# Supplementary material for: Comparison of SIV and HIV-1 Genomic RNA Structures Reveals Impact of Sequence Evolution on Conserved and Non-Conserved Structural Motifs
Source: PubMed Central journal article supplement (PMC3616985; doi:10.1371/journal.ppat.1003294), 2013-04-04
Supplement: ppat.1003294.s004.pdf [file ppat.1003294.s004.pdf]

## Text S1

**SHAPE-directed RNA structure modeling.** Inclusion of SHAPE information provides an experimental adjustment to the well-established nearest neighbor model for RNA folding [1]. For secondary structure prediction, SHAPE data are incorporated as a pseudo-free energy change term,  $\Delta G_{\text{SHAPE}}$ , implemented in *RNAstructure* [2]:

$$\Delta G_{\text{SHAPE}} = m \ln[\text{SHAPE} + 1] + b \quad (1)$$

The slope,  $m$ , corresponds to a penalty for base pairing that increases with the experimental SHAPE reactivity, and the intercept,  $b$ , reflects a favorable pseudo-free energy change term for base pairing at nucleotides with low SHAPE reactivities. These two parameters must be determined empirically. When Watts *et al.* analyzed the HIV-1<sub>NL4-3</sub> genome,  $m = 3.0$  and  $b = -0.6$  were the optimal parameters [3]; in general, these parameters still perform well. The recently updated parameters are  $m = 1.9$  and  $b = -0.7$  give the highest sensitivities in a bootstrapping statistical analysis of multiple RNAs [4]. Changing the slope and intercept parameters from  $m = 3.0$ ,  $b = -0.6$  to  $m = 1.9$ ,  $b = -0.7$  results in a reduction of 34% in the number of base pairs that were predicted in the HIV-1<sub>NL4-3</sub> genome, most were in weakly structured regions.

## References

1. Mathews DH, Disney MD, Childs JL, Schroeder SJ, Zuker M, et al. (2004) Incorporating chemical modification constraints into a dynamic programming algorithm for prediction of RNA secondary structure. *Proc Natl Acad Sci U S A* 101: 7287-7292.
2. Deigan KE, Li TW, Mathews DH, Weeks KM (2009) Accurate SHAPE-directed RNA structure determination. *Proc Natl Acad Sci U S A* 106: 97-102.
3. Watts JM, Dang KK, Gorelick RJ, Leonard CW, Bess JW, Jr., et al. (2009) Architecture and secondary structure of an entire HIV-1 RNA genome. *Nature* 460: 711-716.
4. Hajdin CE, Bellaousov S, Huggins W, Leonard CW, Mathews DH, et al. (2013) Accurate SHAPE-directed RNA Secondary Structure Modeling, Including Pseudoknots. *Proc Natl Acad Sci U S A* 110: in press.
