# Supplementary material for: Comparison of SIV and HIV-1 Genomic RNA Structures Reveals Impact of Sequence Evolution on Conserved and Non-Conserved Structural Motifs
Source: PubMed Central journal article supplement (PMC3616985; doi:10.1371/journal.ppat.1003294), 2013-04-04
Supplement: ppat.1003294.s005.pdf [file ppat.1003294.s005.pdf]

**DATASET S1** Helix file for the SIVmac239 RNA genome structure model folded with parameters  $m = 1.9$  and  $b = -0.7$ .

| First nucleotide in helix | Last nucleotide in helix | Number of base pairs in helix |
|---------------------------|--------------------------|-------------------------------|
| 1                         | 124                      | 11                            |
| 13                        | 91                       | 5                             |
| 18                        | 52                       | 5                             |
| 24                        | 47                       | 3                             |
| 29                        | 44                       | 5                             |
| 54                        | 85                       | 8                             |
| 64                        | 77                       | 4                             |
| 93                        | 113                      | 8                             |
| 126                       | 186                      | 6                             |
| 133                       | 179                      | 8                             |
| 142                       | 151                      | 3                             |
| 191                       | 539                      | 8                             |
| 199                       | 380                      | 4                             |
| 204                       | 376                      | 6                             |
| 210                       | 364                      | 4                             |
| 216                       | 360                      | 2                             |
| 219                       | 358                      | 7                             |
| 226                       | 348                      | 5                             |
| 244                       | 328                      | 3                             |
| 249                       | 302                      | 9                             |
| 264                       | 287                      | 10                            |
| 330                       | 342                      | 4                             |
| 386                       | 531                      | 4                             |
| 392                       | 460                      | 5                             |
| 397                       | 441                      | 7                             |
| 411                       | 434                      | 4                             |
| 417                       | 430                      | 3                             |
| 461                       | 478                      | 6                             |
| 494                       | 526                      | 7                             |
| 501                       | 518                      | 6                             |
| 541                       | 549                      | 2                             |
| 550                       | 609                      | 5                             |
| 562                       | 603                      | 3                             |
| 570                       | 596                      | 3                             |
| 619                       | 636                      | 7                             |
| 679                       | 748                      | 10                            |
| 697                       | 730                      | 2                             |
| 699                       | 725                      | 5                             |
| 765                       | 932                      | 5                             |

|      |      |   |
|------|------|---|
| 776  | 926  | 3 |
| 780  | 923  | 4 |
| 790  | 915  | 6 |
| 797  | 818  | 5 |
| 820  | 846  | 3 |
| 824  | 840  | 3 |
| 853  | 864  | 4 |
| 884  | 902  | 4 |
| 936  | 1009 | 8 |
| 954  | 974  | 6 |
| 975  | 984  | 2 |
| 1036 | 1077 | 4 |
| 1043 | 1065 | 7 |
| 1079 | 1601 | 7 |
| 1087 | 1103 | 6 |
| 1111 | 1562 | 6 |
| 1120 | 1468 | 4 |
| 1128 | 1403 | 4 |
| 1161 | 1190 | 2 |
| 1165 | 1186 | 7 |
| 1198 | 1225 | 5 |
| 1227 | 1291 | 3 |
| 1256 | 1270 | 5 |
| 1273 | 1283 | 4 |
| 1297 | 1346 | 7 |
| 1309 | 1339 | 2 |
| 1312 | 1336 | 2 |
| 1317 | 1331 | 4 |
| 1357 | 1389 | 3 |
| 1360 | 1385 | 7 |
| 1409 | 1423 | 3 |
| 1425 | 1441 | 6 |
| 1469 | 1503 | 7 |
| 1514 | 1549 | 3 |
| 1518 | 1545 | 3 |
| 1526 | 1537 | 3 |
| 1577 | 1589 | 4 |
| 1605 | 1636 | 3 |
| 1615 | 1628 | 4 |
| 1644 | 1901 | 6 |
| 1651 | 1891 | 4 |
| 1659 | 1883 | 4 |
| 1664 | 1788 | 3 |

|      |      |    |
|------|------|----|
| 1671 | 1780 | 1  |
| 1673 | 1778 | 5  |
| 1679 | 1772 | 3  |
| 1688 | 1760 | 4  |
| 1693 | 1725 | 2  |
| 1702 | 1716 | 5  |
| 1737 | 1756 | 6  |
| 1793 | 1851 | 7  |
| 1806 | 1843 | 4  |
| 1814 | 1833 | 4  |
| 1852 | 1879 | 8  |
| 1863 | 1869 | 2  |
| 1903 | 2433 | 4  |
| 1909 | 2065 | 4  |
| 1913 | 2059 | 4  |
| 1918 | 2054 | 3  |
| 1926 | 1964 | 9  |
| 1935 | 1951 | 2  |
| 1938 | 1948 | 3  |
| 1968 | 1984 | 2  |
| 1996 | 2050 | 8  |
| 2014 | 2040 | 6  |
| 2021 | 2034 | 3  |
| 2067 | 2406 | 9  |
| 2076 | 2396 | 2  |
| 2088 | 2121 | 6  |
| 2094 | 2113 | 3  |
| 2099 | 2107 | 3  |
| 2123 | 2150 | 10 |
| 2151 | 2389 | 6  |
| 2159 | 2187 | 4  |
| 2164 | 2182 | 2  |
| 2166 | 2179 | 2  |
| 2189 | 2367 | 4  |
| 2211 | 2222 | 4  |
| 2237 | 2354 | 4  |
| 2253 | 2336 | 4  |
| 2268 | 2326 | 7  |
| 2275 | 2318 | 5  |
| 2303 | 2311 | 3  |
| 2373 | 2382 | 2  |
| 2408 | 2428 | 6  |
| 2442 | 2455 | 4  |

|      |      |   |
|------|------|---|
| 2462 | 2497 | 3 |
| 2465 | 2493 | 5 |
| 2474 | 2485 | 4 |
| 2505 | 2581 | 4 |
| 2510 | 2555 | 2 |
| 2512 | 2552 | 5 |
| 2518 | 2546 | 4 |
| 2564 | 2573 | 3 |
| 2588 | 2604 | 6 |
| 2610 | 2617 | 2 |
| 2618 | 2938 | 2 |
| 2620 | 2935 | 6 |
| 2626 | 2928 | 2 |
| 2630 | 2906 | 6 |
| 2641 | 2895 | 3 |
| 2649 | 2888 | 3 |
| 2653 | 2885 | 2 |
| 2655 | 2882 | 9 |
| 2666 | 2871 | 4 |
| 2671 | 2866 | 2 |
| 2673 | 2835 | 6 |
| 2680 | 2828 | 4 |
| 2685 | 2824 | 3 |
| 2689 | 2788 | 4 |
| 2694 | 2734 | 4 |
| 2700 | 2728 | 3 |
| 2706 | 2721 | 6 |
| 2745 | 2781 | 8 |
| 2790 | 2815 | 7 |
| 2797 | 2807 | 3 |
| 2845 | 2863 | 2 |
| 2848 | 2860 | 3 |
| 2909 | 2921 | 4 |
| 2950 | 2978 | 3 |
| 2953 | 2974 | 6 |
| 2980 | 3481 | 7 |
| 2996 | 3038 | 3 |
| 3007 | 3026 | 7 |
| 3039 | 3050 | 3 |
| 3052 | 3430 | 4 |
| 3057 | 3425 | 2 |
| 3066 | 3138 | 8 |
| 3075 | 3130 | 3 |

|      |      |    |
|------|------|----|
| 3085 | 3118 | 4  |
| 3089 | 3112 | 3  |
| 3146 | 3422 | 4  |
| 3150 | 3416 | 5  |
| 3166 | 3400 | 4  |
| 3171 | 3395 | 8  |
| 3193 | 3331 | 7  |
| 3210 | 3273 | 4  |
| 3218 | 3267 | 8  |
| 3228 | 3235 | 2  |
| 3285 | 3323 | 7  |
| 3297 | 3314 | 3  |
| 3334 | 3382 | 2  |
| 3338 | 3378 | 6  |
| 3344 | 3368 | 5  |
| 3436 | 3473 | 3  |
| 3440 | 3467 | 3  |
| 3487 | 3526 | 5  |
| 3496 | 3517 | 3  |
| 3528 | 3597 | 1  |
| 3529 | 3595 | 8  |
| 3551 | 3565 | 4  |
| 3570 | 3584 | 6  |
| 3607 | 3961 | 5  |
| 3613 | 3953 | 4  |
| 3618 | 3945 | 3  |
| 3623 | 3940 | 2  |
| 3626 | 3637 | 4  |
| 3645 | 3937 | 6  |
| 3653 | 3929 | 3  |
| 3657 | 3704 | 4  |
| 3662 | 3699 | 3  |
| 3666 | 3695 | 3  |
| 3712 | 3860 | 6  |
| 3725 | 3749 | 4  |
| 3733 | 3742 | 3  |
| 3759 | 3772 | 2  |
| 3775 | 3843 | 12 |
| 3792 | 3826 | 2  |
| 3795 | 3823 | 2  |
| 3800 | 3808 | 3  |
| 3877 | 3916 | 4  |
| 3883 | 3910 | 7  |

|      |      |   |
|------|------|---|
| 3977 | 4406 | 5 |
| 3988 | 4194 | 6 |
| 3997 | 4185 | 4 |
| 4002 | 4047 | 2 |
| 4005 | 4044 | 2 |
| 4009 | 4042 | 8 |
| 4051 | 4081 | 7 |
| 4085 | 4175 | 5 |
| 4095 | 4166 | 4 |
| 4104 | 4159 | 6 |
| 4111 | 4140 | 4 |
| 4142 | 4151 | 2 |
| 4203 | 4400 | 4 |
| 4208 | 4395 | 6 |
| 4228 | 4255 | 3 |
| 4231 | 4251 | 8 |
| 4257 | 4385 | 3 |
| 4263 | 4378 | 9 |
| 4272 | 4296 | 2 |
| 4276 | 4293 | 4 |
| 4301 | 4367 | 9 |
| 4310 | 4357 | 5 |
| 4321 | 4345 | 2 |
| 4325 | 4337 | 4 |
| 4407 | 4948 | 3 |
| 4417 | 4942 | 4 |
| 4422 | 4937 | 3 |
| 4425 | 4933 | 4 |
| 4429 | 4928 | 4 |
| 4434 | 4860 | 4 |
| 4442 | 4740 | 7 |
| 4449 | 4732 | 2 |
| 4458 | 4627 | 7 |
| 4467 | 4556 | 9 |
| 4481 | 4508 | 5 |
| 4489 | 4499 | 3 |
| 4520 | 4529 | 3 |
| 4531 | 4545 | 4 |
| 4575 | 4597 | 4 |
| 4581 | 4591 | 3 |
| 4661 | 4730 | 4 |
| 4679 | 4726 | 8 |
| 4689 | 4714 | 5 |

|      |      |    |
|------|------|----|
| 4698 | 4707 | 2  |
| 4744 | 4854 | 5  |
| 4752 | 4847 | 2  |
| 4756 | 4842 | 7  |
| 4770 | 4793 | 3  |
| 4773 | 4789 | 2  |
| 4777 | 4786 | 2  |
| 4814 | 4824 | 2  |
| 4862 | 4907 | 5  |
| 4872 | 4896 | 7  |
| 4950 | 5365 | 6  |
| 4958 | 5357 | 5  |
| 4965 | 5244 | 6  |
| 4973 | 5234 | 2  |
| 4976 | 5232 | 12 |
| 4988 | 5219 | 2  |
| 4994 | 5012 | 6  |
| 5015 | 5195 | 3  |
| 5029 | 5077 | 2  |
| 5032 | 5074 | 8  |
| 5040 | 5065 | 2  |
| 5048 | 5063 | 4  |
| 5079 | 5098 | 4  |
| 5083 | 5092 | 3  |
| 5110 | 5127 | 3  |
| 5130 | 5153 | 8  |
| 5154 | 5187 | 5  |
| 5161 | 5182 | 5  |
| 5168 | 5177 | 3  |
| 5202 | 5216 | 2  |
| 5205 | 5213 | 2  |
| 5246 | 5272 | 5  |
| 5252 | 5264 | 4  |
| 5275 | 5292 | 2  |
| 5277 | 5288 | 4  |
| 5295 | 5344 | 4  |
| 5302 | 5337 | 2  |
| 5304 | 5334 | 3  |
| 5307 | 5319 | 4  |
| 5322 | 5331 | 3  |
| 5393 | 5923 | 4  |
| 5398 | 5919 | 7  |
| 5410 | 5419 | 3  |

|      |      |   |
|------|------|---|
| 5421 | 5911 | 4 |
| 5431 | 5889 | 7 |
| 5439 | 5882 | 3 |
| 5445 | 5878 | 3 |
| 5449 | 5874 | 4 |
| 5458 | 5853 | 3 |
| 5461 | 5846 | 5 |
| 5471 | 5798 | 6 |
| 5478 | 5792 | 4 |
| 5483 | 5787 | 2 |
| 5486 | 5527 | 4 |
| 5491 | 5520 | 4 |
| 5495 | 5514 | 8 |
| 5535 | 5758 | 4 |
| 5541 | 5750 | 5 |
| 5548 | 5743 | 3 |
| 5551 | 5636 | 4 |
| 5557 | 5630 | 3 |
| 5561 | 5627 | 4 |
| 5570 | 5619 | 3 |
| 5576 | 5615 | 4 |
| 5581 | 5611 | 7 |
| 5589 | 5604 | 4 |
| 5643 | 5701 | 7 |
| 5663 | 5671 | 2 |
| 5675 | 5689 | 4 |
| 5703 | 5713 | 3 |
| 5801 | 5840 | 5 |
| 5806 | 5826 | 4 |
| 5855 | 5870 | 2 |
| 5858 | 5867 | 3 |
| 5890 | 5905 | 6 |
| 5925 | 6155 | 1 |
| 5927 | 5946 | 6 |
| 5957 | 6021 | 3 |
| 5960 | 6017 | 5 |
| 5965 | 6008 | 2 |
| 5968 | 6004 | 3 |
| 5972 | 6000 | 4 |
| 5980 | 5996 | 5 |
| 6026 | 6039 | 3 |
| 6047 | 6056 | 3 |
| 6062 | 6144 | 5 |



|      |      |   |
|------|------|---|
| 6069 | 6135 | 4 |
| 6078 | 6127 | 7 |
| 6086 | 6120 | 4 |
| 6090 | 6115 | 4 |
| 6098 | 6108 | 2 |
| 6160 | 6202 | 4 |
| 6165 | 6197 | 2 |
| 6168 | 6194 | 6 |
| 6176 | 6187 | 3 |
| 6205 | 6762 | 4 |
| 6210 | 6677 | 8 |
| 6218 | 6667 | 3 |
| 6221 | 6663 | 5 |
| 6232 | 6257 | 2 |
| 6235 | 6255 | 3 |
| 6239 | 6252 | 4 |
| 6259 | 6271 | 4 |
| 6272 | 6279 | 2 |
| 6285 | 6610 | 7 |
| 6294 | 6600 | 5 |
| 6301 | 6308 | 2 |
| 6310 | 6481 | 6 |
| 6316 | 6329 | 3 |
| 6331 | 6389 | 4 |
| 6339 | 6385 | 4 |
| 6347 | 6375 | 4 |
| 6352 | 6360 | 3 |
| 6362 | 6370 | 3 |
| 6397 | 6452 | 9 |
| 6407 | 6425 | 6 |
| 6494 | 6589 | 5 |
| 6499 | 6582 | 4 |
| 6517 | 6529 | 4 |
| 6531 | 6575 | 8 |
| 6541 | 6563 | 4 |
| 6628 | 6652 | 7 |
| 6684 | 6737 | 1 |
| 6685 | 6735 | 3 |
| 6688 | 6731 | 4 |
| 6695 | 6727 | 2 |
| 6698 | 6724 | 2 |
| 6701 | 6722 | 7 |
| 6739 | 6748 | 3 |

|      |      |   |
|------|------|---|
| 6764 | 7358 | 3 |
| 6777 | 7165 | 3 |
| 6781 | 7162 | 4 |
| 6786 | 7156 | 6 |
| 6793 | 6803 | 4 |
| 6804 | 6815 | 3 |
| 6820 | 6859 | 3 |
| 6827 | 6849 | 4 |
| 6832 | 6844 | 4 |
| 6861 | 6894 | 2 |
| 6863 | 6891 | 6 |
| 6869 | 6884 | 4 |
| 6897 | 7128 | 6 |
| 6903 | 7029 | 7 |
| 6929 | 6956 | 2 |
| 6931 | 6953 | 2 |
| 6934 | 6950 | 5 |
| 6957 | 7000 | 6 |
| 6973 | 6986 | 5 |
| 7003 | 7021 | 3 |
| 7007 | 7018 | 3 |
| 7045 | 7121 | 5 |
| 7051 | 7116 | 5 |
| 7059 | 7097 | 4 |
| 7065 | 7090 | 8 |
| 7099 | 7110 | 3 |
| 7167 | 7223 | 8 |
| 7179 | 7191 | 4 |
| 7204 | 7214 | 4 |
| 7224 | 7238 | 5 |
| 7240 | 7262 | 4 |
| 7244 | 7255 | 4 |
| 7268 | 7292 | 5 |
| 7274 | 7286 | 4 |
| 7300 | 7349 | 8 |
| 7313 | 7341 | 3 |
| 7317 | 7337 | 3 |
| 7373 | 7411 | 6 |
| 7379 | 7392 | 4 |
| 7417 | 7438 | 7 |
| 7444 | 8024 | 5 |
| 7451 | 8017 | 5 |
| 7458 | 8010 | 3 |

|      |      |   |
|------|------|---|
| 7466 | 8006 | 5 |
| 7476 | 7501 | 7 |
| 7527 | 7954 | 5 |
| 7533 | 7949 | 6 |
| 7539 | 7942 | 2 |
| 7541 | 7939 | 7 |
| 7549 | 7932 | 3 |
| 7556 | 7567 | 4 |
| 7583 | 7928 | 2 |
| 7587 | 7924 | 4 |
| 7591 | 7919 | 3 |
| 7594 | 7915 | 3 |
| 7601 | 7909 | 3 |
| 7606 | 7666 | 6 |
| 7624 | 7647 | 5 |
| 7630 | 7640 | 4 |
| 7668 | 7900 | 7 |
| 7677 | 7892 | 7 |
| 7684 | 7884 | 4 |
| 7688 | 7879 | 7 |
| 7699 | 7870 | 5 |
| 7707 | 7774 | 5 |
| 7713 | 7743 | 6 |
| 7719 | 7735 | 7 |
| 7744 | 7767 | 6 |
| 7752 | 7760 | 2 |
| 7775 | 7792 | 7 |
| 7793 | 7864 | 3 |
| 7798 | 7831 | 4 |
| 7803 | 7827 | 2 |
| 7808 | 7822 | 5 |
| 7832 | 7857 | 8 |
| 7961 | 7997 | 2 |
| 7963 | 7994 | 6 |
| 7971 | 7980 | 3 |
| 8026 | 8399 | 5 |
| 8042 | 8058 | 1 |
| 8044 | 8057 | 5 |
| 8063 | 8104 | 7 |
| 8106 | 8122 | 6 |
| 8127 | 8135 | 3 |
| 8138 | 8169 | 5 |
| 8175 | 8231 | 5 |

|      |      |   |
|------|------|---|
| 8180 | 8225 | 3 |
| 8190 | 8218 | 6 |
| 8198 | 8210 | 3 |
| 8233 | 8378 | 7 |
| 8240 | 8370 | 7 |
| 8251 | 8359 | 4 |
| 8256 | 8354 | 3 |
| 8262 | 8351 | 4 |
| 8267 | 8346 | 5 |
| 8273 | 8340 | 4 |
| 8278 | 8336 | 4 |
| 8284 | 8315 | 4 |
| 8290 | 8309 | 2 |
| 8295 | 8304 | 3 |
| 8319 | 8328 | 2 |
| 8404 | 8853 | 1 |
| 8406 | 8851 | 4 |
| 8418 | 8432 | 3 |
| 8435 | 8450 | 3 |
| 8439 | 8446 | 2 |
| 8452 | 8838 | 6 |
| 8458 | 8831 | 3 |
| 8470 | 8820 | 3 |
| 8474 | 8694 | 7 |
| 8489 | 8647 | 4 |
| 8493 | 8642 | 1 |
| 8496 | 8639 | 2 |
| 8498 | 8636 | 9 |
| 8508 | 8625 | 3 |
| 8515 | 8533 | 7 |
| 8548 | 8566 | 6 |
| 8568 | 8607 | 2 |
| 8571 | 8603 | 7 |
| 8581 | 8596 | 6 |
| 8649 | 8658 | 3 |
| 8660 | 8686 | 2 |
| 8663 | 8684 | 3 |
| 8669 | 8680 | 2 |
| 8702 | 8713 | 4 |
| 8715 | 8728 | 5 |
| 8744 | 8764 | 3 |
| 8766 | 8777 | 3 |
| 8778 | 8800 | 5 |

|      |      |    |
|------|------|----|
| 8854 | 9061 | 7  |
| 8862 | 9016 | 4  |
| 8867 | 9011 | 3  |
| 8873 | 8944 | 9  |
| 8888 | 8922 | 6  |
| 8896 | 8916 | 3  |
| 8902 | 8913 | 2  |
| 8949 | 8983 | 7  |
| 8962 | 8973 | 2  |
| 9018 | 9026 | 3  |
| 9028 | 9039 | 3  |
| 9072 | 9625 | 3  |
| 9076 | 9622 | 4  |
| 9081 | 9368 | 5  |
| 9089 | 9363 | 9  |
| 9101 | 9354 | 3  |
| 9105 | 9350 | 4  |
| 9120 | 9153 | 3  |
| 9128 | 9148 | 3  |
| 9131 | 9144 | 5  |
| 9157 | 9183 | 8  |
| 9166 | 9175 | 3  |
| 9185 | 9246 | 3  |
| 9188 | 9242 | 7  |
| 9196 | 9214 | 2  |
| 9199 | 9212 | 4  |
| 9216 | 9232 | 4  |
| 9221 | 9228 | 2  |
| 9252 | 9345 | 6  |
| 9266 | 9332 | 4  |
| 9271 | 9328 | 3  |
| 9274 | 9324 | 3  |
| 9293 | 9320 | 9  |
| 9371 | 9611 | 5  |
| 9382 | 9427 | 9  |
| 9392 | 9406 | 4  |
| 9409 | 9418 | 3  |
| 9444 | 9452 | 2  |
| 9462 | 9585 | 11 |
| 9474 | 9552 | 5  |
| 9479 | 9513 | 5  |
| 9485 | 9508 | 3  |
| 9490 | 9505 | 5  |

|      |      |   |
|------|------|---|
| 9515 | 9546 | 8 |
| 9525 | 9538 | 4 |
| 9554 | 9574 | 8 |
| 9594 | 9606 | 4 |
| 9627 | 9640 | 5 |
