# Supplementary material for: Comparison of SIV and HIV-1 Genomic RNA Structures Reveals Impact of Sequence Evolution on Conserved and Non-Conserved Structural Motifs
Source: PubMed Central journal article supplement (PMC3616985; doi:10.1371/journal.ppat.1003294), 2013-04-04
Supplement: ppat.1003294.s006.pdf [file ppat.1003294.s006.pdf]

**DATASET S2** SHAPE reactivities and pairing probabilities for the SIVmac239 genome.

| Nucleotide position | Nucleotide identity | SHAPE reactivity | Pairing probability |
|---------------------|---------------------|------------------|---------------------|
| 1                   | A                   |                  | 0.99                |
| 2                   | G                   |                  | 1                   |
| 3                   | U                   | 0.014            | 0.99                |
| 4                   | C                   | 0.163            | 1                   |
| 5                   | G                   | 0.203            | 1                   |
| 6                   | C                   | 0.122            | 1                   |
| 7                   | U                   | 0.122            | 1                   |
| 8                   | C                   | 0.095            | 1                   |
| 9                   | U                   | 0.136            | 1                   |
| 10                  | G                   | 0.244            | 1                   |
| 11                  | C                   | 0.122            | 0.96                |
| 12                  | G                   | 0.76             | 0.04                |
| 13                  | G                   | 0.041            | 0.97                |
| 14                  | A                   | 0.095            | 1                   |
| 15                  | G                   | 0.068            | 1                   |
| 16                  | A                   | 0.176            | 1                   |
| 17                  | G                   | 0.203            | 0.97                |
| 18                  | G                   | 0.068            | 0.97                |
| 19                  | C                   | 0.163            | 1                   |
| 20                  | U                   | 0.597            | 1                   |
| 21                  | G                   | 0.068            | 1                   |
| 22                  | G                   | 0.149            | 0.97                |
| 23                  | C                   | 0.258            | 0.02                |
| 24                  | A                   | 0.095            | 0.95                |
| 25                  | G                   | 0.095            | 0.99                |
| 26                  | A                   | 0.271            | 0.94                |
| 27                  | U                   | 0.271            | 0                   |
| 28                  | U                   | 0.203            | 5.40E-05            |
| 29                  | G                   | 0.095            | 0.97                |
| 30                  | A                   | 0.095            | 0.99                |
| 31                  | G                   | 0.095            | 0.97                |
| 32                  | C                   | 0.068            | 0.97                |
| 33                  | C                   | 0.068            | 0.97                |
| 34                  | C                   | 0.068            | 0.04                |
| 35                  | U                   | 0.434            | 0.01                |
| 36                  | G                   | 0.258            | 0.01                |
| 37                  | G                   | 0.244            | 0                   |
| 38                  | G                   | 0.014            | 0                   |
| 39                  | A                   | 0.651            | 0.02                |
| 40                  | G                   | 0.081            | 0.97                |

|    |   |       |      |
|----|---|-------|------|
| 41 | G | 0.163 | 0.99 |
| 42 | U | 0.122 | 0.97 |
| 43 | U | 0.081 | 0.99 |
| 44 | C | 0.136 | 0.97 |
| 45 | U | 0.109 | 0.95 |
| 46 | C | 0.136 | 0.99 |
| 47 | U | 0.109 | 0.95 |
| 48 | C | 0.095 | 0.97 |
| 49 | C | 0.217 | 1    |
| 50 | A | 0.054 | 1    |
| 51 | G | 0.095 | 1    |
| 52 | C | 0.136 | 0.97 |
| 53 | A | 0.407 | 0.03 |
| 54 | C | 0.109 | 0.96 |
| 55 | U | 0.095 | 0.98 |
| 56 | A | 0.081 | 0.99 |
| 57 | G | 0.068 | 1    |
| 58 | C | 0.081 | 1    |
| 59 | A | 0.068 | 1    |
| 60 | G | 0.081 | 1    |
| 61 | G | 0.122 | 0.97 |
| 62 | U | 0.38  | 0    |
| 63 | A | 0.285 | 0.01 |
| 64 | G | 0.027 | 0.94 |
| 65 | A | 0.081 | 0.96 |
| 66 | G | 0.081 | 0.95 |
| 67 | C | 0.095 | 0.95 |
| 68 | C | 0.068 | 0.04 |
| 69 | U | 0.461 | 0.02 |
| 70 | G | 0.461 | 0.04 |
| 71 | G | 0.244 | 0.04 |
| 72 | G | 0.136 | 0.05 |
| 73 | U | 0.176 | 0.02 |
| 74 | G | 0.068 | 0.91 |
| 75 | U | 0.109 | 0.93 |
| 76 | U | 0.095 | 0.96 |
| 77 | C | 0.081 | 0.97 |
| 78 | C | 0.095 | 0.96 |
| 79 | C | 0.434 | 1    |
| 80 | U | 0.122 | 0.99 |
| 81 | G | 0.109 | 1    |
| 82 | C | 0.285 | 1    |
| 83 | U | 0.109 | 1    |

|     |   |       |          |
|-----|---|-------|----------|
| 84  | A | 0.027 | 0.99     |
| 85  | G | 0.068 | 0.97     |
| 86  | A | 0.081 | 0.87     |
| 87  | C | 0.136 | 0.97     |
| 88  | U | 0.081 | 1        |
| 89  | C | 0.095 | 1        |
| 90  | U | 0.095 | 1        |
| 91  | C | 0.19  | 0.96     |
| 92  | A | 0.122 | 0.04     |
| 93  | C | 0.163 | 0.98     |
| 94  | C | 0.095 | 1        |
| 95  | A | 0.054 | 1        |
| 96  | G | 0.149 | 1        |
| 97  | C | 0.095 | 1        |
| 98  | A | 0.081 | 1        |
| 99  | C | 0.054 | 0.99     |
| 100 | U | 0.203 | 0.58     |
| 101 | U | 0.624 | 0        |
| 102 | G | 0.176 | 0        |
| 103 | G | 0.149 | 0        |
| 104 | C | 0.109 | 0        |
| 105 | C | 0.095 | 2.00E-06 |
| 106 | G | 0.014 | 0.58     |
| 107 | G | 0.068 | 0.99     |
| 108 | U | 0.068 | 1        |
| 109 | G | 0.068 | 1        |
| 110 | C | 0.014 | 1        |
| 111 | U | 0.054 | 1        |
| 112 | G | 0.746 | 1        |
| 113 | G | 1.478 | 0.98     |
| 114 | G | 0.095 | 0.96     |
| 115 | C | 0.041 | 1        |
| 116 | A | 0.8   | 1        |
| 117 | G | 0.746 | 1        |
| 118 | A | 2.658 | 1        |
| 119 | G | 0.353 | 1        |
| 120 | U | 1.506 | 1        |
| 121 | G | 0.163 | 1        |
| 122 | A | 0.217 | 0.99     |
| 123 | C | 2.672 | 1        |
| 124 | U | 0.054 | 0.99     |
| 125 | C | 0.217 | 0.2      |
| 126 | C | 0.054 | 0.97     |

|     |   |       |      |
|-----|---|-------|------|
| 127 | A | 0.203 | 1    |
| 128 | C | 0.122 | 1    |
| 129 | G | 0.068 | 0.98 |
| 130 | C | 0.027 | 0.99 |
| 131 | U | 0.081 | 0.94 |
| 132 | U | 0.068 | 0.77 |
| 133 | G | 0     | 0.89 |
| 134 | C | 0.041 | 0.99 |
| 135 | U | 0.014 | 1    |
| 136 | U | 0.122 | 0.99 |
| 137 | G | 0.19  | 0.96 |
| 138 | C | 0.136 | 0.97 |
| 139 | U | 0.041 | 0.98 |
| 140 | U | 0.054 | 0.73 |
| 141 | A | 0.366 | 0.12 |
| 142 | A | 0.597 | 0.08 |
| 143 | A | 0.244 | 0.06 |
| 144 | G | 0.163 | 0.04 |
| 145 | C | 0.163 | 0.05 |
| 146 | C | 0.095 | 0.04 |
| 147 | C | 0.068 | 0.5  |
| 148 | U | 0.081 | 0.77 |
| 149 | C | 0.041 | 0.89 |
| 150 | U | 0.054 | 0.83 |
| 151 | U | 0.041 | 0.58 |
| 152 | C | 0.081 | 0.57 |
| 153 | A | 0.163 | 0.56 |
| 154 | A | 0.434 | 0.42 |
| 155 | U | 0.502 | 0.67 |
| 156 | A | 0.949 | 0.55 |
| 157 | A | 0.543 | 0.5  |
| 158 | A | 0.502 | 0.42 |
| 159 | G | 0.665 | 0.58 |
| 160 | C | 0.054 | 0.59 |
| 161 | U | 0.027 | 0.67 |
| 162 | G | 0.109 | 0.67 |
| 163 | C | 0.149 | 0.57 |
| 164 | C | 0.068 | 0.56 |
| 165 | A | 0.298 | 0.14 |
| 166 | U | 0.882 | 0.22 |
| 167 | U | 0.42  | 0.9  |
| 168 | U | 0.475 | 0.94 |
| 169 | U | 0.583 | 0.91 |

|     |   |       |      |
|-----|---|-------|------|
| 170 | A | 2.089 | 0.98 |
| 171 | G | 1.031 | 0.93 |
| 172 | A | 1.153 | 0.97 |
| 173 | A | 0.312 | 0.98 |
| 174 | G | 0.068 | 1    |
| 175 | U | 0.081 | 1    |
| 176 | A | 0.122 | 1    |
| 177 | A | 0.244 | 0.99 |
| 178 | G | 0.136 | 0.98 |
| 179 | C | 0.068 | 0.67 |
| 180 | U | 0.041 | 0.4  |
| 181 | A | 0.19  | 0.79 |
| 182 | G | 0.231 | 0.82 |
| 183 | U | 0.095 | 0.8  |
| 184 | G | 0.312 | 0.96 |
| 185 | U | 0.109 | 0.96 |
| 186 | G | 0.366 | 0.96 |
| 187 | U | 0.19  | 0.69 |
| 188 | G | 0.285 | 0.76 |
| 189 | U | 0.407 | 0.73 |
| 190 | U | 0.19  | 0.62 |
| 191 | C | 0.231 | 0.95 |
| 192 | C | 0     | 0.99 |
| 193 | C | 0     | 1    |
| 194 | A | 0.217 | 1    |
| 195 | U | 0.122 | 1    |
| 196 | C | 0.081 | 1    |
| 197 | U | 0.041 | 1    |
| 198 | C | 0.054 | 0.98 |
| 199 | U | 0.244 | 0.97 |
| 200 | C | 0.068 | 1    |
| 201 | C | 0     | 1    |
| 202 | U | 0.122 | 0.96 |
| 203 | A | 0.8   | 0    |
| 204 | G | 0.855 | 0.78 |
| 205 | C | 0     | 0.79 |
| 206 | C | 0     | 0.8  |
| 207 | G | 0.014 | 1    |
| 208 | C | 0     | 1    |
| 209 | C | 0.014 | 0.98 |
| 210 | G | 0.258 | 0.85 |
| 211 | C | 0.448 | 0.87 |
| 212 | C | 0.041 | 0.99 |

|     |   |       |      |
|-----|---|-------|------|
| 213 | U | 0.122 | 0.77 |
| 214 | G | 0.176 | 0.31 |
| 215 | G | 0.434 | 0.01 |
| 216 | U | 1.302 | 0.96 |
| 217 | C | 0.407 | 0.99 |
| 218 | A | 0.732 | 0.97 |
| 219 | A | 1.099 | 0.38 |
| 220 | C | 0.095 | 0.51 |
| 221 | U | 0.014 | 0.9  |
| 222 | C | 0.014 | 0.89 |
| 223 | G | 0.027 | 0.51 |
| 224 | G | 0.068 | 0.54 |
| 225 | U | 0.027 | 0.98 |
| 226 | A | 0     | 0.98 |
| 227 | C | 0.068 | 0.97 |
| 228 | U | 0.041 | 0.95 |
| 229 | C | 0.068 | 0.81 |
| 230 | A | 0.163 | 0.1  |
| 231 | A | 0.556 | 0    |
| 232 | U | 0.99  | 0    |
| 233 | A | 5.968 | 0    |
| 234 | A | 1.017 | 0    |
| 235 | U | 0.909 | 0.04 |
| 236 | A | 8.206 | 0.06 |
| 237 | A | 1.601 | 0.05 |
| 238 | G | 1.234 | 0.3  |
| 239 | A | 1.248 | 0.81 |
| 240 | A | 1.533 | 0.83 |
| 241 | G | 1.628 | 0.84 |
| 242 | A | 0.407 | 0.59 |
| 243 | C | 0.203 | 0.98 |
| 244 | C | 0.041 | 1    |
| 245 | C | 0.136 | 1    |
| 246 | U | 0.027 | 0.99 |
| 247 | G | 0.19  | 0.93 |
| 248 | G | 0.19  | 0.23 |
| 249 | U | 0.122 | 0.71 |
| 250 | C | 0.122 | 0.99 |
| 251 | U | 1.234 | 1    |
| 252 | G | 0.543 | 1    |
| 253 | U | 0.42  | 0.99 |
| 254 | U | 0.041 | 1    |
| 255 | A | 0.095 | 0.99 |

|     |   |       |      |
|-----|---|-------|------|
| 256 | G | 0.434 | 1    |
| 257 | G | 0.068 | 0.98 |
| 258 | A | 0.027 | 0.36 |
| 259 | C | 0.109 | 0.42 |
| 260 | C | 0.176 | 0.84 |
| 261 | C | 0.149 | 0.46 |
| 262 | U | 1.533 | 0.16 |
| 263 | U | 0.109 | 0.12 |
| 264 | U | 0.203 | 0.05 |
| 265 | C | 0.095 | 0.04 |
| 266 | U | 0.041 | 0.06 |
| 267 | G | 0.014 | 0.97 |
| 268 | C | 0.054 | 0.99 |
| 269 | U | 0.719 | 0.98 |
| 270 | U | 0.081 | 0.98 |
| 271 | U | 0.054 | 0.98 |
| 272 | G | 0.068 | 0.99 |
| 273 | G | 0.027 | 0.93 |
| 274 | G | 0.203 | 0    |
| 275 | A | 0.041 | 0    |
| 276 | A | 0.014 | 0    |
| 277 | A | 0.461 | 0    |
| 278 | C | 0.244 | 0.94 |
| 279 | C | 0.42  | 0.99 |
| 280 | G | 0.014 | 0.98 |
| 281 | A | 0.081 | 0.97 |
| 282 | A | 0.095 | 0.97 |
| 283 | G | 0.163 | 0.99 |
| 284 | C | 0.231 | 0.97 |
| 285 | A | 0.027 | 0.11 |
| 286 | G | 0.014 | 0.91 |
| 287 | G | 3.201 | 0.91 |
| 288 | A | 5.344 | 0.08 |
| 289 | A | 0.217 | 0.09 |
| 290 | A | 0.129 | 0.06 |
| 291 | A | 0.136 | 0.03 |
| 292 | U | 0.176 | 0.35 |
| 293 | C | 0.434 | 0.37 |
| 294 | C | 0.109 | 0.81 |
| 295 | C | 0.42  | 0.81 |
| 296 | U | 0.109 | 0.99 |
| 297 | A | 0.095 | 1    |
| 298 | G | 0.19  | 0.99 |

|     |   |       |      |
|-----|---|-------|------|
| 299 | C | 0.081 | 1    |
| 300 | A | 0.041 | 1    |
| 301 | G | 0     | 0.96 |
| 302 | A | 0.041 | 0.58 |
| 303 | U | 0.217 | 0.83 |
| 304 | U | 0.109 | 0.82 |
| 305 | G | 0.176 | 0.44 |
| 306 | G | 0.041 | 0.03 |
| 307 | C | 0.109 | 0.03 |
| 308 | G | 0.258 | 0.02 |
| 309 | C | 0.326 | 0.05 |
| 310 | C | 0.271 | 0.05 |
| 311 | U | 0.326 | 0.44 |
| 312 | G | 0.244 | 0.47 |
| 313 | A | 0.353 | 0.83 |
| 314 | A | 0.624 | 0.48 |
| 315 | C | 0.488 | 0.94 |
| 316 | A | 0.42  | 0.99 |
| 317 | G | 0.163 | 1    |
| 318 | G | 0.095 | 1    |
| 319 | G | 0.176 | 0.99 |
| 320 | A | 0.271 | 0.56 |
| 321 | C | 0.61  | 0.81 |
| 322 | U | 0.353 | 0.91 |
| 323 | U | 0.231 | 0.9  |
| 324 | G | 0.122 | 0.44 |
| 325 | A | 0.122 | 0.14 |
| 326 | A | 0.095 | 0.01 |
| 327 | G | 0.203 | 0.03 |
| 328 | G | 0.149 | 0.1  |
| 329 | A | 0.014 | 0.91 |
| 330 | G | 0.041 | 0.94 |
| 331 | A | 0.176 | 0.74 |
| 332 | G | 0.326 | 0.95 |
| 333 | U | 0.353 | 0.75 |
| 334 | G | 0.109 | 0.01 |
| 335 | A | 0.217 | 0.01 |
| 336 | G | 0.081 | 0    |
| 337 | A | 0.095 | 0    |
| 338 | G | 0.136 | 0.75 |
| 339 | A | 0.041 | 0.95 |
| 340 | C | 0.041 | 0.72 |
| 341 | U | 0.054 | 0.91 |



|     |   |       |      |
|-----|---|-------|------|
| 342 | C | 0.109 | 0.91 |
| 343 | C | 0.014 | 0.1  |
| 344 | U | 0.176 | 0.11 |
| 345 | G | 0.122 | 0.64 |
| 346 | A | 0.244 | 0.77 |
| 347 | G | 1.275 | 0.97 |
| 348 | U | 0.407 | 0.99 |
| 349 | A | 0.122 | 0.98 |
| 350 | C | 1.695 | 0.43 |
| 351 | G | 0.61  | 0.09 |
| 352 | G | 0.366 | 0.06 |
| 353 | C | 0.136 | 0.2  |
| 354 | U | 0.244 | 0.45 |
| 355 | G | 0.271 | 0.86 |
| 356 | A | 0     | 0.88 |
| 357 | G | 0.285 | 0.82 |
| 358 | U | 0.393 | 0.97 |
| 359 | G | 0.448 | 0.99 |
| 360 | A | 0.217 | 0.95 |
| 361 | A | 0.258 | 0.43 |
| 362 | G | 0.353 | 0.66 |
| 363 | G | 0.244 | 0.66 |
| 364 | C | 0.217 | 0.96 |
| 365 | A | 0.203 | 0.32 |
| 366 | G | 0.163 | 0.22 |
| 367 | U | 0.149 | 0.01 |
| 368 | A | 0.19  | 0.01 |
| 369 | A | 0.624 | 0.02 |
| 370 | G | 0.393 | 0.04 |
| 371 | G | 0.149 | 0.89 |
| 372 | G | 0.326 | 0.98 |
| 373 | C | 0.298 | 1    |
| 374 | G | 0.217 | 1    |
| 375 | G | 0     | 0.99 |
| 376 | C | 0.014 | 0.97 |
| 377 | A | 0.258 | 0.96 |
| 378 | G | 0.529 | 1    |
| 379 | G | 0.244 | 1    |
| 380 | A | 0.339 | 0.96 |
| 381 | A | 0.258 | 0    |
| 382 | C | 0.231 | 0    |
| 383 | C | 0.217 | 0    |
| 384 | A | 0.19  | 0    |

|     |   |       |      |
|-----|---|-------|------|
| 385 | A | 0.285 | 0    |
| 386 | C | 0.122 | 0.98 |
| 387 | C | 0.258 | 1    |
| 388 | A | 0.244 | 0.99 |
| 389 | C | 0.38  | 0.95 |
| 390 | G | 0.176 | 0.64 |
| 391 | A | 0.258 | 0.69 |
| 392 | C | 0.326 | 0.98 |
| 393 | G | 0.258 | 0.98 |
| 394 | G | 0.366 | 0.97 |
| 395 | A | 0.258 | 0.95 |
| 396 | G | 0.095 | 0.88 |
| 397 | U | 0.556 | 0.39 |
| 398 | G | 0     | 0.97 |
| 399 | C | 0.231 | 1    |
| 400 | U | 0.298 | 1    |
| 401 | C | 0.312 | 1    |
| 402 | C | 0.176 | 0.99 |
| 403 | U | 0     | 0.65 |
| 404 | A | 0.014 | 0    |
| 405 | U | 0.156 | 0.06 |
| 406 | A | 0.054 | 0.07 |
| 407 | A | 0.149 | 0.07 |
| 408 | A | 0.068 | 0.01 |
| 409 | G | 0.054 | 0    |
| 410 | G | 0.732 | 0.54 |
| 411 | C | 0.346 | 0.99 |
| 412 | G | 0     | 1    |
| 413 | C | 0.041 | 0.98 |
| 414 | G | 0     | 0    |
| 415 | G | 0.285 | 0.08 |
| 416 | G | 0.699 | 0.98 |
| 417 | U | 0.17  | 0.92 |
| 418 | C | 0.142 | 0.81 |
| 419 | G | 0.136 | 0.01 |
| 420 | G | 0.434 | 0    |
| 421 | U | 0.515 | 0    |
| 422 | A | 0.488 | 0    |
| 423 | C | 0.76  | 0.08 |
| 424 | C | 0.326 | 0.08 |
| 425 | A | 0.38  | 0.01 |
| 426 | G | 6.144 | 0.81 |
| 427 | A | 0.353 | 0.92 |

|     |   |       |      |
|-----|---|-------|------|
| 428 | C | 0.217 | 0.91 |
| 429 | G | 0.081 | 0    |
| 430 | G | 0.732 | 0.97 |
| 431 | C | 0.109 | 0.99 |
| 432 | G | 0     | 0.99 |
| 433 | U | 0.163 | 0.62 |
| 434 | G | 0.285 | 0.09 |
| 435 | A | 1.967 | 0.71 |
| 436 | G | 0.665 | 0.99 |
| 437 | G | 0.095 | 1    |
| 438 | A | 0.163 | 1    |
| 439 | G | 0.163 | 1    |
| 440 | C | 0.136 | 0.98 |
| 441 | G | 0     | 0.22 |
| 442 | G | 2.618 | 0.26 |
| 443 | G | 0.692 | 0.2  |
| 444 | A | 0.841 | 0.17 |
| 445 | G | 0.692 | 0.16 |
| 446 | A | 0.583 | 0.03 |
| 447 | G | 0.814 | 0.01 |
| 448 | G | 1.112 | 0    |
| 449 | A | 0.285 | 0    |
| 450 | A | 0.515 | 0.02 |
| 451 | G | 0.434 | 0.03 |
| 452 | A | 0.298 | 0.02 |
| 453 | G | 0.312 | 0.02 |
| 454 | G | 0.176 | 0.51 |
| 455 | C | 0.149 | 0.62 |
| 456 | C | 0.041 | 0.98 |
| 457 | U | 0.068 | 0.99 |
| 458 | C | 0     | 1    |
| 459 | C | 0.203 | 1    |
| 460 | G | 1.56  | 0.95 |
| 461 | G | 0.081 | 0.43 |
| 462 | U | 0.041 | 0.99 |
| 463 | U | 0.027 | 1    |
| 464 | G | 0.014 | 1    |
| 465 | C | 0     | 0.89 |
| 466 | A | 0.149 | 0.79 |
| 467 | G | 0.488 | 0    |
| 468 | G | 0.868 | 0    |
| 469 | U | 0.027 | 0    |
| 470 | A | 1.424 | 0    |

|     |   |       |          |
|-----|---|-------|----------|
| 471 | A | 1.18  | 0        |
| 472 | G | 2.224 | 0        |
| 473 | U | 0.163 | 0.79     |
| 474 | G | 0.027 | 0.89     |
| 475 | C | 0.014 | 1        |
| 476 | A | 0.068 | 1        |
| 477 | A | 0.068 | 0.99     |
| 478 | C | 0.027 | 0.43     |
| 479 | A | 0.99  | 0.19     |
| 480 | C | 0     | 0.15     |
| 481 | A | 1.153 | 0.11     |
| 482 | A | 0.99  | 0.3      |
| 483 | A | 1.194 | 1        |
| 484 | A | 1.031 | 1        |
| 485 | A | 1.126 | 0.24     |
| 486 | A | 1.261 | 0.24     |
| 487 | G | 1.397 | 0        |
| 488 | A | 1.356 | 0        |
| 489 | A | 1.139 | 0        |
| 490 | A | 1.261 | 6.90E-05 |
| 491 | U | 0.42  | 2.10E-05 |
| 492 | A | 1.994 | 0        |
| 493 | G | 1.004 | 0.46     |
| 494 | C | 0.054 | 1        |
| 495 | U | 0.014 | 1        |
| 496 | G | 0     | 1        |
| 497 | U | 0     | 1        |
| 498 | C | 0     | 0.04     |
| 499 | U | 0.014 | 0.22     |
| 500 | U | 0.014 | 0.64     |
| 501 | U | 0.041 | 0.51     |
| 502 | U | 0.027 | 0.01     |
| 503 | A | 0.054 | 0.02     |
| 504 | U | 0.014 | 0.07     |
| 505 | C | 0     | 0.1      |
| 506 | C | 0     | 0.04     |
| 507 | A | 1.492 | 0.01     |
| 508 | G | 0.719 | 0.56     |
| 509 | G | 1.343 | 0.62     |
| 510 | A | 1.126 | 0.19     |
| 511 | A | 0.705 | 0.12     |
| 512 | G | 1.56  | 0.08     |
| 513 | G | 0.054 | 0.06     |

|     |   |       |      |
|-----|---|-------|------|
| 514 | G | 0     | 0.04 |
| 515 | G | 0     | 1    |
| 516 | U | 0     | 1    |
| 517 | A | 0.109 | 1    |
| 518 | A | 0.448 | 1    |
| 519 | U | 0.515 | 0.66 |
| 520 | A | 0.109 | 0.2  |
| 521 | A | 0.081 | 0    |
| 522 | G | 0.081 | 0    |
| 523 | A | 0.081 | 0    |
| 524 | U | 0.014 | 0.03 |
| 525 | A | 0.149 | 0.04 |
| 526 | G | 0.231 | 1    |
| 527 | A | 1.248 | 1    |
| 528 | G | 0.448 | 0.97 |
| 529 | U | 0.298 | 1    |
| 530 | G | 0.203 | 1    |
| 531 | G | 0.095 | 0.98 |
| 532 | G | 0.041 | 0.98 |
| 533 | A | 0.081 | 1    |
| 534 | G | 0.041 | 1    |
| 535 | A | 0.095 | 1    |
| 536 | U | 0.054 | 1    |
| 537 | G | 0.027 | 1    |
| 538 | G | 0     | 0.98 |
| 539 | G |       | 0.85 |
| 540 | C | 0.095 | 0.71 |
| 541 | G | 0.556 | 0.5  |
| 542 | U | 0.393 | 0.41 |
| 543 | G | 0.895 | 0.7  |
| 544 | A | 0.787 | 0.61 |
| 545 | G | 0.787 | 0.39 |
| 546 | A | 1.194 | 0.3  |
| 547 | A | 1.75  | 0.32 |
| 548 | A | 0.068 | 0.53 |
| 549 | C | 0.014 | 0.94 |
| 550 | U | 0.014 | 0.93 |
| 551 | C | 0.014 | 0.86 |
| 552 | C | 0     | 0.95 |
| 553 | G | 0.027 | 0.89 |
| 554 | U | 0.054 | 0.96 |
| 555 | C | 0.095 | 0.95 |
| 556 | U | 0.726 | 0.82 |

|     |   |       |      |
|-----|---|-------|------|
| 557 | U | 0.624 | 0.73 |
| 558 | G | 0.61  | 0.47 |
| 559 | U | 0.38  | 0.1  |
| 560 | C | 0.244 | 0.02 |
| 561 | A | 0.739 | 0.07 |
| 562 | G | 0.115 | 0.37 |
| 563 | G | 0.075 | 0.79 |
| 564 | G | 0.149 | 0.82 |
| 565 | A | 0.237 | 0.73 |
| 566 | A | 0.346 | 0.15 |
| 567 | G | 0.292 | 0.13 |
| 568 | A | 0.637 | 0.18 |
| 569 | A | 0.651 | 0.18 |
| 570 | A | 0.346 | 0.17 |
| 571 | G | 0.19  | 0.3  |
| 572 | C | 0     | 0.63 |
| 573 | A | 0.637 | 0.75 |
| 574 | G | 0.583 | 0.62 |
| 575 | A | 0.712 | 0.47 |
| 576 | U | 0.543 | 0.45 |
| 577 | G | 0.495 | 0.43 |
| 578 | A | 0.346 | 0.7  |
| 579 | A | 0.441 | 0.76 |
| 580 | U | 0.305 | 0.86 |
| 581 | U | 0.665 | 0.83 |
| 582 | A | 0.949 | 0.24 |
| 583 | G | 0.482 | 0.17 |
| 584 | A | 0.746 | 0.18 |
| 585 | A | 0.556 | 0.16 |
| 586 | A | 0.692 | 0.09 |
| 587 | A | 1.004 | 0.06 |
| 588 | A | 0.882 | 0.67 |
| 589 | A | 0.732 | 0.73 |
| 590 | U | 0.488 | 0.87 |
| 591 | U | 0.787 | 0.79 |
| 592 | A | 1.017 | 0.42 |
| 593 | G | 0.705 | 0.79 |
| 594 | G | 0.136 | 0.97 |
| 595 | C | 0.081 | 0.99 |
| 596 | U | 0.203 | 1    |
| 597 | A | 0.597 | 1    |
| 598 | C | 0.231 | 1    |
| 599 | G | 0.244 | 0.97 |

|     |   |       |      |
|-----|---|-------|------|
| 600 | A | 0.448 | 0.99 |
| 601 | C | 0.122 | 0.98 |
| 602 | C | 0.095 | 0.94 |
| 603 | C | 0.068 | 0.81 |
| 604 | A | 0.488 | 0.8  |
| 605 | A | 0.543 | 0.8  |
| 606 | C | 0     | 0.89 |
| 607 | G | 0.19  | 0.92 |
| 608 | G | 0.8   | 0.91 |
| 609 | A | 0.909 | 0.89 |
| 610 | A | 0.977 | 0.8  |
| 611 | A | 1.044 | 0.81 |
| 612 | G | 1.044 | 0.81 |
| 613 | A | 1.261 | 0.75 |
| 614 | A | 1.234 | 0.75 |
| 615 | A | 1.356 | 0.75 |
| 616 | A | 1.017 | 0.75 |
| 617 | A | 1.221 | 0.74 |
| 618 | G | 1.18  | 0.75 |
| 619 | U | 1.329 | 0.76 |
| 620 | A | 0.203 | 0.76 |
| 621 | C | 0.122 | 0.68 |
| 622 | A | 0.027 | 0.68 |
| 623 | U | 0.081 | 0.68 |
| 624 | G | 0     | 0.68 |
| 625 | U | 0     | 0.84 |
| 626 | U | 0.57  | 0.99 |
| 627 | G | 1.953 | 0.96 |
| 628 | A | 1.465 | 0.45 |
| 629 | A | 0.8   | 0.22 |
| 630 | G | 1.194 | 0.14 |
| 631 | C | 0.543 | 0.4  |
| 632 | A | 0.081 | 0.51 |
| 633 | U | 0.095 | 0.67 |
| 634 | G | 0.095 | 0.68 |
| 635 | U | 0.054 | 0.65 |
| 636 | A | 0.149 | 0.49 |
| 637 | G | 0.448 | 0.52 |
| 638 | U | 0.99  | 0.65 |
| 639 | A | 0.949 | 0.59 |
| 640 | U | 1.587 | 0.8  |
| 641 | G | 0.583 | 0.75 |
| 642 | G | 0.855 | 0.9  |

|     |   |       |      |
|-----|---|-------|------|
| 643 | G | 0.054 | 0.87 |
| 644 | C | 0.027 | 0.9  |
| 645 | A | 0.081 | 0.78 |
| 646 | G | 0.163 | 0.65 |
| 647 | C | 0.231 | 0.69 |
| 648 | A | 0.149 | 0.4  |
| 649 | A | 0.692 | 0.42 |
| 650 | A | 0.637 | 0.42 |
| 651 | U | 0.909 | 0.61 |
| 652 | G | 0.651 | 0.76 |
| 653 | A | 1.166 | 0.86 |
| 654 | A | 1.085 | 0.91 |
| 655 | U | 0.855 | 0.97 |
| 656 | U | 0.502 | 0.77 |
| 657 | A | 1.56  | 0.24 |
| 658 | G | 1.275 | 0.22 |
| 659 | A | 1.126 | 0.22 |
| 660 | U | 1.302 | 0.21 |
| 661 | A | 1.411 | 0.27 |
| 662 | G | 1.221 | 0.72 |
| 663 | A | 0.868 | 0.89 |
| 664 | U | 0.827 | 0.96 |
| 665 | U | 0.434 | 0.93 |
| 666 | U | 0.61  | 0.8  |
| 667 | G | 0.488 | 0.58 |
| 668 | G | 0.719 | 0.42 |
| 669 | A | 0.719 | 0.59 |
| 670 | U | 0.8   | 0.91 |
| 671 | U | 0.488 | 0.63 |
| 672 | A | 1.072 | 0.36 |
| 673 | G | 0.882 | 0.4  |
| 674 | C | 0.868 | 0.41 |
| 675 | A | 0.678 | 0.37 |
| 676 | G | 1.587 | 0.37 |
| 677 | A | 0.895 | 0.38 |
| 678 | A | 1.912 | 0.37 |
| 679 | A | 1.424 | 0.33 |
| 680 | G | 0.393 | 0.13 |
| 681 | C | 0.122 | 0.9  |
| 682 | C | 0.054 | 0.98 |
| 683 | U | 0.054 | 0.99 |
| 684 | G | 0.041 | 0.99 |
| 685 | U | 0.041 | 0.99 |



|     |   |       |      |
|-----|---|-------|------|
| 686 | U | 0.109 | 0.99 |
| 687 | G | 0.068 | 0.97 |
| 688 | G | 0.041 | 0.89 |
| 689 | A | 0.122 | 0.76 |
| 690 | G | 0.366 | 0.85 |
| 691 | A | 1.112 | 0.77 |
| 692 | A | 1.031 | 0.61 |
| 693 | C | 0.99  | 0.4  |
| 694 | A | 0.434 | 0.36 |
| 695 | A | 0.868 | 0.41 |
| 696 | A | 1.207 | 0.73 |
| 697 | G | 1.546 | 0.75 |
| 698 | A | 0.76  | 0.76 |
| 699 | A | 0.746 | 0.62 |
| 700 | G | 0.855 | 0.18 |
| 701 | G | 0.271 | 0.29 |
| 702 | A | 0.258 | 0.56 |
| 703 | U | 0.502 | 0.66 |
| 704 | G | 0.231 | 0.4  |
| 705 | U | 0.597 | 0.24 |
| 706 | C | 0.732 | 0.2  |
| 707 | A | 0.326 | 0.24 |
| 708 | A | 1.085 | 0.27 |
| 709 | A | 0.827 | 0.24 |
| 710 | A | 1.044 | 0.23 |
| 711 | A | 0.963 | 0.26 |
| 712 | A | 0.922 | 0.41 |
| 713 | U | 1.112 | 0.84 |
| 714 | A | 0.841 | 0.91 |
| 715 | C | 0.448 | 0.83 |
| 716 | U | 0.136 | 0.77 |
| 717 | U | 0.271 | 0.33 |
| 718 | U | 0.326 | 0.28 |
| 719 | C | 0.448 | 0.27 |
| 720 | G | 0.298 | 0.18 |
| 721 | G | 0.366 | 0.67 |
| 722 | U | 0.041 | 0.75 |
| 723 | C | 0.203 | 0.75 |
| 724 | U | 0.149 | 0.57 |
| 725 | U | 0.326 | 0.54 |
| 726 | A | 0.624 | 0.18 |
| 727 | G | 1.234 | 0.24 |
| 728 | C | 0.42  | 0.63 |

|     |   |       |      |
|-----|---|-------|------|
| 729 | U | 0.054 | 0.79 |
| 730 | C | 0     | 0.74 |
| 731 | C | 0     | 0.23 |
| 732 | A | 0.068 | 0.63 |
| 733 | U | 0.624 | 0.79 |
| 734 | U | 0.529 | 0.72 |
| 735 | A | 1.072 | 0.21 |
| 736 | G | 1.031 | 0.42 |
| 737 | U | 1.478 | 0.43 |
| 738 | G | 1.397 | 0.16 |
| 739 | C | 0.081 | 0.87 |
| 740 | C | 0     | 0.96 |
| 741 | A | 0.081 | 0.96 |
| 742 | A | 0.027 | 0.97 |
| 743 | C | 0.122 | 0.97 |
| 744 | A | 0.095 | 0.96 |
| 745 | G | 0     | 0.95 |
| 746 | G | 0     | 0.92 |
| 747 | C | 0     | 0.95 |
| 748 | U |       | 0.97 |
| 749 | C | 0     | 0.68 |
| 750 | A | 0.665 | 0.46 |
| 751 | G | 1.506 | 0.35 |
| 752 | A | 0.76  | 0.26 |
| 753 | A | 1.139 | 0.43 |
| 754 | A | 0.922 | 0.53 |
| 755 | A | 0.624 | 0.66 |
| 756 | U | 0.61  | 0.89 |
| 757 | U | 0.353 | 0.93 |
| 758 | U | 0.448 | 0.78 |
| 759 | A | 1.166 | 0.66 |
| 760 | A | 1.343 | 0.8  |
| 761 | A | 1.072 | 0.78 |
| 762 | A | 1.112 | 0.64 |
| 763 | A | 1.044 | 0.31 |
| 764 | G | 0.543 | 0.26 |
| 765 | C | 0.271 | 0.25 |
| 766 | C | 0.068 | 0.27 |
| 767 | U | 0     | 0.65 |
| 768 | U | 0     | 0.93 |
| 769 | U | 0.543 | 0.97 |
| 770 | A | 1.194 | 0.89 |
| 771 | U | 1.465 | 0.79 |

|     |   |       |      |
|-----|---|-------|------|
| 772 | A | 1.261 | 0.74 |
| 773 | A | 1.221 | 0.72 |
| 774 | U | 1.207 | 0.84 |
| 775 | A | 1.356 | 0.55 |
| 776 | C | 0.407 | 0.56 |
| 777 | U | 0.109 | 0.57 |
| 778 | G | 0.068 | 0.61 |
| 779 | U | 0.312 | 0.89 |
| 780 | C | 0.149 | 0.99 |
| 781 | U | 0.014 | 0.99 |
| 782 | G |       | 0.99 |
| 783 | C | 0.136 | 0.98 |
| 784 | G | 0.014 | 0.97 |
| 785 | U | 0.298 | 0.8  |
| 786 | C | 0.258 | 0.64 |
| 787 | A | 0.19  | 0.64 |
| 788 | U | 0.353 | 0.08 |
| 789 | C | 0.163 | 0.07 |
| 790 | U | 0.081 | 0.09 |
| 791 | G | 0.041 | 0.06 |
| 792 | G | 0.203 | 0.02 |
| 793 | U | 0.163 | 0.71 |
| 794 | G | 0.041 | 0.71 |
| 795 | C | 0.19  | 0.04 |
| 796 | A | 0.122 | 0.03 |
| 797 | U | 0.515 | 0.05 |
| 798 | U | 0.176 | 0.04 |
| 799 | C | 0.326 | 0.1  |
| 800 | A | 0.149 | 0.86 |
| 801 | C | 0.448 | 0.97 |
| 802 | G | 0.163 | 0.98 |
| 803 | C | 0.61  | 0.98 |
| 804 | A | 0.339 | 0.93 |
| 805 | G | 0.637 | 0.89 |
| 806 | A | 0.57  | 0.74 |
| 807 | A | 0.882 | 0.34 |
| 808 | G | 0.543 | 0.46 |
| 809 | A | 1.004 | 0.58 |
| 810 | G | 1.017 | 0.62 |
| 811 | A | 0.882 | 0.44 |
| 812 | A | 0.936 | 0.41 |
| 813 | A | 1.221 | 0.68 |
| 814 | G | 1.18  | 0.77 |

|     |   |       |      |
|-----|---|-------|------|
| 815 | U | 0.258 | 0.76 |
| 816 | G | 0.041 | 0.47 |
| 817 | A | 0.258 | 0.26 |
| 818 | A | 0.624 | 0.35 |
| 819 | A | 0.556 | 0.24 |
| 820 | C | 0.678 | 0.18 |
| 821 | A | 0.339 | 0.26 |
| 822 | C | 0.407 | 0.63 |
| 823 | A | 0.136 | 0.73 |
| 824 | C | 0.353 | 0.83 |
| 825 | U | 0.095 | 0.88 |
| 826 | G | 0.203 | 0.57 |
| 827 | A | 1.207 | 0.36 |
| 828 | G | 0.529 | 0.23 |
| 829 | G | 0.42  | 0.33 |
| 830 | A | 0.448 | 0.42 |
| 831 | A | 0.515 | 0.56 |
| 832 | G | 0.529 | 0.68 |
| 833 | C | 0.407 | 0.71 |
| 834 | A | 0.42  | 0.69 |
| 835 | A | 0.949 | 0.62 |
| 836 | A | 2.814 | 0.65 |
| 837 | A | 1.77  | 0.67 |
| 838 | C | 0.916 | 0.88 |
| 839 | A | 0.244 | 0.86 |
| 840 | G | 0.549 | 0.83 |
| 841 | A | 0.597 | 0.7  |
| 842 | U | 0.861 | 0.74 |
| 843 | A | 0.529 | 0.72 |
| 844 | G | 0.902 | 0.67 |
| 845 | U | 0.522 | 0.56 |
| 846 | G | 0.339 | 0.21 |
| 847 | C | 0.583 | 0.23 |
| 848 | A | 0.414 | 0.65 |
| 849 | G | 1.051 | 0.89 |
| 850 | A | 0.76  | 0.85 |
| 851 | G | 1.051 | 0.68 |
| 852 | A | 0.861 | 0.45 |
| 853 | C | 1.356 | 0.07 |
| 854 | A | 0.366 | 0.17 |
| 855 | C | 0.285 | 0.94 |
| 856 | C | 0.156 | 0.99 |
| 857 | U | 1.478 | 0.95 |

|     |   |       |      |
|-----|---|-------|------|
| 858 | A | 1.519 | 0.71 |
| 859 | G | 0.848 | 0.86 |
| 860 | U | 0.597 | 0.91 |
| 861 | G | 0.448 | 0.85 |
| 862 | G | 0.203 | 0.91 |
| 863 | U | 0.244 | 0.76 |
| 864 | G | 0.047 | 0.64 |
| 865 | G | 0.19  | 0.31 |
| 866 | A | 0.732 | 0.04 |
| 867 | A | 0.875 | 0.03 |
| 868 | A | 0.983 | 0.03 |
| 869 | C | 0.929 | 0.16 |
| 870 | A | 0.678 | 0.17 |
| 871 | G | 0.841 | 0.14 |
| 872 | G | 0.536 | 0.09 |
| 873 | A | 0.665 | 0.08 |
| 874 | A | 0.855 | 0.16 |
| 875 | C | 0.922 | 0.71 |
| 876 | A | 0.285 | 0.83 |
| 877 | A | 1.261 | 0.83 |
| 878 | C | 1.316 | 0.76 |
| 879 | A | 0.203 | 0.47 |
| 880 | G | 1.356 | 0.32 |
| 881 | A | 1.194 | 0.22 |
| 882 | A | 1.478 | 0.07 |
| 883 | A | 1.37  | 0.17 |
| 884 | C | 0.855 | 0.24 |
| 885 | U | 0.163 | 0.24 |
| 886 | A | 0.231 | 0.21 |
| 887 | U | 1.424 | 0.85 |
| 888 | G | 0.543 | 0.93 |
| 889 | C | 0.285 | 0.88 |
| 890 | C | 0.081 | 0.82 |
| 891 | A | 0.258 | 0.59 |
| 892 | A | 0.719 | 0.56 |
| 893 | A | 0.841 | 0.57 |
| 894 | A | 1.438 | 0.77 |
| 895 | A | 1.221 | 0.79 |
| 896 | C | 1.289 | 0.74 |
| 897 | A | 0.231 | 0.42 |
| 898 | A | 0.977 | 0.48 |
| 899 | G | 0.814 | 0.61 |
| 900 | U | 0.814 | 0.4  |

|     |   |       |      |
|-----|---|-------|------|
| 901 | A | 0.054 | 0.29 |
| 902 | G | 1.044 | 0.07 |
| 903 | A | 0.841 | 0.06 |
| 904 | C | 0.705 | 0.16 |
| 905 | C | 0.149 | 0.28 |
| 906 | A | 0     | 0.29 |
| 907 | A | 1.085 | 0.34 |
| 908 | C | 1.017 | 0.4  |
| 909 | A | 0.461 | 0.39 |
| 910 | G | 0.895 | 0.31 |
| 911 | C | 0.515 | 0.19 |
| 912 | A | 0.203 | 0.17 |
| 913 | C | 0.434 | 0.1  |
| 914 | C | 0.122 | 0.11 |
| 915 | A | 0.068 | 0.16 |
| 916 | U | 0.38  | 0.12 |
| 917 | C | 0.149 | 0.78 |
| 918 | U | 0.298 | 0.96 |
| 919 | A | 0.461 | 0.9  |
| 920 | G | 0.882 | 0.52 |
| 921 | C | 0.8   | 0.34 |
| 922 | G | 0.231 | 0.22 |
| 923 | G | 0.149 | 0.02 |
| 924 | C | 0.271 | 0.01 |
| 925 | A | 0     | 0.03 |
| 926 | G | 0.488 | 0.09 |
| 927 | A | 0.827 | 0.14 |
| 928 | G | 1.017 | 0.53 |
| 929 | G | 0.42  | 0.51 |
| 930 | A | 0.732 | 0.21 |
| 931 | G | 0.705 | 0.29 |
| 932 | G | 0.448 | 0.17 |
| 933 | A | 0.882 | 0.02 |
| 934 | A | 0.787 | 0.02 |
| 935 | A | 0.8   | 0.03 |
| 936 | U | 0.827 | 0.26 |
| 937 | U | 0.488 | 0.33 |
| 938 | A | 0.339 | 0.21 |
| 939 | C | 0.42  | 0.47 |
| 940 | C | 0.109 | 0.55 |
| 941 | C | 0.014 | 0.17 |
| 942 | A | 0.109 | 0.02 |
| 943 | G | 0.787 | 0.01 |

|     |   |       |      |
|-----|---|-------|------|
| 944 | U | 0.719 | 0.01 |
| 945 | A | 0.637 | 0    |
| 946 | C | 1.058 | 0    |
| 947 | A | 0.244 | 0    |
| 948 | A | 0.977 | 0    |
| 949 | C | 1.031 | 0    |
| 950 | A | 0     | 0    |
| 951 | A | 1.031 | 0    |
| 952 | A | 1.248 | 0    |
| 953 | U | 1.465 | 0.02 |
| 954 | A | 1.275 | 0.08 |
| 955 | G | 0.895 | 0.07 |
| 956 | G | 0.353 | 0    |
| 957 | U | 0.258 | 0.01 |
| 958 | G | 0.271 | 0.03 |
| 959 | G | 0.068 | 0.02 |
| 960 | U | 0.136 | 0    |
| 961 | A | 0.475 | 0    |
| 962 | A | 0.814 | 0    |
| 963 | C | 0.583 | 0.07 |
| 964 | U | 0.258 | 0.09 |
| 965 | A | 0.366 | 0.03 |
| 966 | U | 1.248 | 0    |
| 967 | G | 0.61  | 0    |
| 968 | U | 0.692 | 0.01 |
| 969 | C | 0.298 | 0.02 |
| 970 | C | 0.054 | 0.03 |
| 971 | A | 0.122 | 0.04 |
| 972 | C | 0.163 | 0.01 |
| 973 | C | 0     | 0    |
| 974 | U | 0.014 | 0.92 |
| 975 | G | 0.231 | 0.93 |
| 976 | C | 0.393 | 0.49 |
| 977 | C | 0.163 | 0.46 |
| 978 | A | 0     | 0.14 |
| 979 | U | 0.76  | 0.31 |
| 980 | U | 0.882 | 0.88 |
| 981 | A | 0.42  | 0.9  |
| 982 | A | 1.126 | 0.46 |
| 983 | G | 0.895 | 0.47 |
| 984 | C | 0.298 | 0.07 |
| 985 | C | 0.081 | 0.02 |
| 986 | C | 0.081 | 0.53 |

|      |   |       |      |
|------|---|-------|------|
| 987  | G | 0     | 0.53 |
| 988  | A | 0.76  | 0.53 |
| 989  | G | 0.692 | 0.54 |
| 990  | A | 0.61  | 0.55 |
| 991  | A | 0.705 | 0.55 |
| 992  | C | 0.57  | 0.54 |
| 993  | A | 0.081 | 0.55 |
| 994  | U | 0.949 | 0.72 |
| 995  | U | 0.8   | 0.9  |
| 996  | A | 0.502 | 0.84 |
| 997  | A | 1.438 | 0.45 |
| 998  | A | 1.017 | 0.11 |
| 999  | U | 0.99  | 0.44 |
| 1000 | G | 0.326 | 0.42 |
| 1001 | C | 0.393 | 0.36 |
| 1002 | C | 0.122 | 0.05 |
| 1003 | U | 0.095 | 0.16 |
| 1004 | G | 0.217 | 0.19 |
| 1005 | G | 0.095 | 0.5  |
| 1006 | G | 0.041 | 0.61 |
| 1007 | U | 0.149 | 0.82 |
| 1008 | A | 0.176 | 0.82 |
| 1009 | A | 0.692 | 0.37 |
| 1010 | A | 0.76  | 0.31 |
| 1011 | A | 0.814 | 0.29 |
| 1012 | U | 0.814 | 0.48 |
| 1013 | U | 0.692 | 0.55 |
| 1014 | G | 0.61  | 0.47 |
| 1015 | A | 0.773 | 0.3  |
| 1016 | U | 1.248 | 0.05 |
| 1017 | A | 0.461 | 0.05 |
| 1018 | G | 1.329 | 0.04 |
| 1019 | A | 1.166 | 0.03 |
| 1020 | G | 1.072 | 0.03 |
| 1021 | G | 1.031 | 0.02 |
| 1022 | A | 0.814 | 0.01 |
| 1023 | A | 1.261 | 0.01 |
| 1024 | A | 1.221 | 0.01 |
| 1025 | A | 1.18  | 0.01 |
| 1026 | G | 1.316 | 0.01 |
| 1027 | A | 1.085 | 0.04 |
| 1028 | A | 1.126 | 0.05 |
| 1029 | A | 0.909 | 0.08 |



|      |   |       |      |
|------|---|-------|------|
| 1030 | U | 0.827 | 0.29 |
| 1031 | U | 0.583 | 0.31 |
| 1032 | U | 0.637 | 0.29 |
| 1033 | G | 0.42  | 0.17 |
| 1034 | G | 0.529 | 0.21 |
| 1035 | A | 0.719 | 0.21 |
| 1036 | G | 0.651 | 0.69 |
| 1037 | C | 0.353 | 0.76 |
| 1038 | A | 0.122 | 0.74 |
| 1039 | G | 0.895 | 0.58 |
| 1040 | A | 0.949 | 0.56 |
| 1041 | A | 1.139 | 0.36 |
| 1042 | G | 1.044 | 0.33 |
| 1043 | U | 0.76  | 0.33 |
| 1044 | A | 0.8   | 0.73 |
| 1045 | G | 0.515 | 0.81 |
| 1046 | U | 0.203 | 0.84 |
| 1047 | G | 0.149 | 0.81 |
| 1048 | C | 0.041 | 0.9  |
| 1049 | C | 0     | 0.86 |
| 1050 | A | 0.054 | 0.05 |
| 1051 | G | 0.109 | 0.08 |
| 1052 | G | 0.488 | 0.07 |
| 1053 | A | 0.515 | 0.11 |
| 1054 | U | 0.8   | 0.13 |
| 1055 | U | 1.017 | 0.13 |
| 1056 | U | 0.488 | 0.11 |
| 1057 | C | 0.665 | 0.11 |
| 1058 | A | 0.692 | 0.07 |
| 1059 | G | 0.271 | 0.83 |
| 1060 | G | 0.936 | 0.9  |
| 1061 | C | 0.136 | 0.83 |
| 1062 | A | 0.095 | 0.89 |
| 1063 | C | 0.068 | 0.91 |
| 1064 | U | 0.326 | 0.83 |
| 1065 | G | 0.054 | 0.26 |
| 1066 | U | 0.285 | 0.6  |
| 1067 | C | 0.746 | 0.67 |
| 1068 | A | 0.556 | 0.44 |
| 1069 | G | 0.271 | 0.23 |
| 1070 | A | 1.438 | 0.31 |
| 1071 | A | 1.072 | 0.38 |
| 1072 | G | 1.072 | 0.5  |

|      |   |       |      |
|------|---|-------|------|
| 1073 | G | 1.275 | 0.49 |
| 1074 | U | 0.258 | 0.36 |
| 1075 | U | 0.217 | 0.86 |
| 1076 | G | 0.258 | 0.89 |
| 1077 | C | 0.19  | 0.86 |
| 1078 | A | 0.692 | 0.59 |
| 1079 | C | 0.434 | 0.59 |
| 1080 | C | 0.149 | 0.32 |
| 1081 | C | 0.081 | 0.43 |
| 1082 | C | 0.068 | 0.48 |
| 1083 | C | 0.054 | 0.35 |
| 1084 | U | 0.041 | 0.36 |
| 1085 | A | 0.122 | 0.18 |
| 1086 | U | 0.434 | 0.78 |
| 1087 | G | 0.665 | 0.78 |
| 1088 | A | 0.42  | 0.54 |
| 1089 | C | 0.298 | 0.22 |
| 1090 | A | 0.231 | 0.11 |
| 1091 | U | 0.081 | 0.1  |
| 1092 | U | 0.339 | 0.08 |
| 1093 | A | 0.312 | 0.06 |
| 1094 | A | 1.411 | 0.16 |
| 1095 | U | 1.194 | 0.19 |
| 1096 | C | 1.085 | 0.21 |
| 1097 | A | 0.651 | 0.2  |
| 1098 | G | 0.393 | 0.02 |
| 1099 | A | 0.99  | 0.07 |
| 1100 | U | 0.665 | 0.22 |
| 1101 | G | 0.583 | 0.19 |
| 1102 | U | 0.258 | 0.12 |
| 1103 | U | 0.353 | 0.84 |
| 1104 | A | 0.271 | 0.95 |
| 1105 | A | 0.705 | 0.83 |
| 1106 | A | 1.37  | 0.31 |
| 1107 | U | 1.085 | 0.64 |
| 1108 | U | 1.044 | 0.9  |
| 1109 | G | 0.624 | 0.83 |
| 1110 | U | 0.461 | 0.59 |
| 1111 | G | 0.502 | 0.55 |
| 1112 | U | 0.176 | 0.4  |
| 1113 | G | 0.353 | 0.06 |
| 1114 | G | 0.312 | 0.43 |
| 1115 | G | 0.136 | 0.41 |

|      |   |       |      |
|------|---|-------|------|
| 1116 | A | 0.068 | 0.11 |
| 1117 | G | 0.217 | 0.02 |
| 1118 | A | 0.353 | 0.03 |
| 1119 | C | 0.244 | 0.04 |
| 1120 | C | 0.326 | 0.22 |
| 1121 | A | 0.054 | 0.23 |
| 1122 | U | 0.095 | 0.11 |
| 1123 | C | 0.407 | 0.22 |
| 1124 | A | 0.434 | 0.21 |
| 1125 | A | 0.312 | 0.11 |
| 1126 | G | 0.841 | 0.29 |
| 1127 | C | 0.895 | 0.35 |
| 1128 | G | 0.461 | 0.31 |
| 1129 | G | 0.041 | 0.11 |
| 1130 | C | 0.217 | 0.41 |
| 1131 | U | 0.407 | 0.45 |
| 1132 | A | 0.122 | 0.45 |
| 1133 | U | 0.326 | 0.77 |
| 1134 | G | 0.977 | 0.84 |
| 1135 | C | 0.475 | 0.85 |
| 1136 | A | 0.488 | 0.62 |
| 1137 | G | 0.203 | 0.55 |
| 1138 | A | 0.814 | 0.38 |
| 1139 | U | 0.773 | 0.92 |
| 1140 | U | 0.949 | 0.98 |
| 1141 | A | 0.651 | 0.84 |
| 1142 | U | 1.072 | 0.11 |
| 1143 | C | 1.099 | 0.1  |
| 1144 | A | 0.515 | 0.1  |
| 1145 | G | 0.556 | 0.02 |
| 1146 | A | 1.126 | 0.01 |
| 1147 | G | 1.614 | 0    |
| 1148 | A | 1.207 | 0    |
| 1149 | U | 1.004 | 0    |
| 1150 | A | 1.207 | 0.08 |
| 1151 | U | 1.166 | 0.1  |
| 1152 | U | 1.261 | 0.04 |
| 1153 | A | 0.583 | 0.04 |
| 1154 | U | 0.76  | 0.04 |
| 1155 | A | 1.695 | 0.05 |
| 1156 | A | 1.316 | 0.02 |
| 1157 | A | 1.736 | 0.08 |
| 1158 | C | 1.166 | 0.39 |

|      |   |       |      |
|------|---|-------|------|
| 1159 | G | 1.058 | 0.32 |
| 1160 | A | 0.597 | 0.02 |
| 1161 | G | 1.017 | 0    |
| 1162 | G | 1.506 | 0.01 |
| 1163 | A | 0.271 | 0.01 |
| 1164 | G | 0.597 | 0.02 |
| 1165 | G | 0.583 | 0.02 |
| 1166 | C | 0.515 | 0.4  |
| 1167 | U | 0.014 | 0.45 |
| 1168 | G | 0.027 | 0.34 |
| 1169 | C | 0.068 | 0.18 |
| 1170 | A | 0.258 | 0.18 |
| 1171 | G | 0.176 | 0.01 |
| 1172 | A | 0.434 | 0.02 |
| 1173 | U | 0.434 | 0.35 |
| 1174 | U | 1.078 | 0.39 |
| 1175 | G | 0.807 | 0.32 |
| 1176 | G | 1.044 | 0.02 |
| 1177 | G | 1.207 | 0.02 |
| 1178 | A | 0.637 | 0    |
| 1179 | C | 0.522 | 0    |
| 1180 | U | 0.488 | 0    |
| 1181 | U | 0.298 | 0    |
| 1182 | G | 0.298 | 0.01 |
| 1183 | C | 0.719 | 0.02 |
| 1184 | A | 1.004 | 0.02 |
| 1185 | G | 0.583 | 0    |
| 1186 | C | 0.434 | 0.01 |
| 1187 | A | 0.393 | 0.01 |
| 1188 | C | 0.217 | 0.08 |
| 1189 | C | 0.488 | 0.56 |
| 1190 | C | 0.936 | 0.49 |
| 1191 | A | 0.217 | 0.01 |
| 1192 | C | 0.42  | 0    |
| 1193 | A | 0.407 | 0    |
| 1194 | A | 0.271 | 0.02 |
| 1195 | C | 0     | 0.59 |
| 1196 | C | 0.719 | 0.59 |
| 1197 | A | 0.936 | 0.01 |
| 1198 | G | 0.217 | 0.01 |
| 1199 | C | 0.461 | 0.01 |
| 1200 | U | 0.285 | 0    |
| 1201 | C | 0.231 | 0.01 |

|      |   |       |      |
|------|---|-------|------|
| 1202 | C | 0.339 | 0.01 |
| 1203 | A | 0     | 0    |
| 1204 | C | 1.343 | 0.95 |
| 1205 | A | 0.909 | 0.95 |
| 1206 | A | 0.393 | 0.01 |
| 1207 | C | 1.194 | 0.01 |
| 1208 | A | 0.936 | 0.01 |
| 1209 | A | 0.692 | 0    |
| 1210 | G | 0.882 | 0.92 |
| 1211 | G | 1.343 | 0.93 |
| 1212 | A | 0.461 | 0.01 |
| 1213 | C | 0.855 | 0    |
| 1214 | A | 0.515 | 0    |
| 1215 | A | 0.014 | 0    |
| 1216 | C | 0.312 | 0.01 |
| 1217 | U | 0.855 | 0.05 |
| 1218 | U | 2.143 | 0.04 |
| 1219 | A | 0.339 | 0.02 |
| 1220 | G | 0.122 | 0.01 |
| 1221 | G | 0.217 | 0.92 |
| 1222 | G | 0.231 | 0.94 |
| 1223 | A | 0.109 | 0.95 |
| 1224 | G | 0.57  | 0.95 |
| 1225 | C | 0.109 | 0.95 |
| 1226 | C | 0.353 | 0.84 |
| 1227 | G | 0.502 | 0    |
| 1228 | U | 0.027 | 0    |
| 1229 | C | 0.366 | 0    |
| 1230 | A | 1.044 | 0    |
| 1231 | G | 0.963 | 0.84 |
| 1232 | G | 0.393 | 0.95 |
| 1233 | A | 0.176 | 0.96 |
| 1234 | U | 1.885 | 0.97 |
| 1235 | C | 0.787 | 0.96 |
| 1236 | A | 0.624 | 0.94 |
| 1237 | G | 1.736 | 0.04 |
| 1238 | A | 0.42  | 0.03 |
| 1239 | U | 0.855 | 0.03 |
| 1240 | A | 0.665 | 0.08 |
| 1241 | U | 0.461 | 0.16 |
| 1242 | U | 0.651 | 0.1  |
| 1243 | G | 0.054 | 0.11 |
| 1244 | C | 1.072 | 0.08 |

|      |   |       |      |
|------|---|-------|------|
| 1245 | A | 1.031 | 0.02 |
| 1246 | G | 1.18  | 0.02 |
| 1247 | G | 1.044 | 0.03 |
| 1248 | A | 0.868 | 0.02 |
| 1249 | A | 0     | 0.02 |
| 1250 | C | 1.248 | 0.08 |
| 1251 | A | 0.922 | 0.07 |
| 1252 | A | 0.38  | 0.07 |
| 1253 | C | 0.461 | 0.08 |
| 1254 | U | 1.451 | 0.06 |
| 1255 | A | 0.014 | 0.03 |
| 1256 | G | 0.041 | 0.09 |
| 1257 | U | 0.122 | 0.21 |
| 1258 | U | 0.014 | 0.14 |
| 1259 | C | 0.231 | 0.04 |
| 1260 | A | 0.543 | 0.04 |
| 1261 | G | 0.895 | 0.08 |
| 1262 | U | 1.736 | 0.14 |
| 1263 | A | 1.302 | 0.08 |
| 1264 | G | 1.478 | 0.04 |
| 1265 | A | 0.583 | 0.09 |
| 1266 | U | 0.326 | 0.25 |
| 1267 | G | 0.543 | 0.19 |
| 1268 | A | 0.42  | 0.01 |
| 1269 | A | 0     | 0    |
| 1270 | C | 1.18  | 0.01 |
| 1271 | A | 1.126 | 0.01 |
| 1272 | A | 0.787 | 0    |
| 1273 | A | 0.448 | 0.03 |
| 1274 | U | 0.122 | 0.04 |
| 1275 | C | 0     | 0.02 |
| 1276 | C | 0.882 | 0.02 |
| 1277 | A | 0.461 | 0.02 |
| 1278 | G | 0.271 | 0.02 |
| 1279 | U | 0.298 | 0.11 |
| 1280 | G | 0.42  | 0.11 |
| 1281 | G | 0.543 | 0.02 |
| 1282 | A | 0.068 | 0.02 |
| 1283 | U | 0.556 | 0.04 |
| 1284 | G | 0.312 | 0.04 |
| 1285 | U | 0.99  | 0.06 |
| 1286 | A | 0.054 | 0.09 |
| 1287 | C | 1.058 | 0.06 |

|      |   |       |      |
|------|---|-------|------|
| 1288 | A | 0.732 | 0.06 |
| 1289 | G | 0.827 | 0.02 |
| 1290 | A | 0     | 0.02 |
| 1291 | C | 0.909 | 0.01 |
| 1292 | A | 0.922 | 0.01 |
| 1293 | A | 0     | 0.01 |
| 1294 | C | 0.936 | 0.01 |
| 1295 | A | 0.773 | 0.01 |
| 1296 | G | 0.678 | 0    |
| 1297 | A | 0.285 | 0.01 |
| 1298 | A | 0.068 | 0.01 |
| 1299 | C | 0.122 | 0.01 |
| 1300 | C | 0.163 | 0.01 |
| 1301 | C | 0     | 0.01 |
| 1302 | C | 0.583 | 0.01 |
| 1303 | A | 0.529 | 0.01 |
| 1304 | U | 1.031 | 0.01 |
| 1305 | A | 0.298 | 0    |
| 1306 | C | 0.014 | 0.01 |
| 1307 | C | 0.651 | 0.01 |
| 1308 | A | 0.732 | 0.01 |
| 1309 | G | 0.393 | 0.01 |
| 1310 | U | 0.827 | 0.01 |
| 1311 | A | 0.461 | 0.01 |
| 1312 | G | 0.488 | 0.01 |
| 1313 | G | 0.231 | 0.01 |
| 1314 | C | 0.515 | 0    |
| 1315 | A | 0.448 | 0    |
| 1316 | A | 0.081 | 0    |
| 1317 | C | 0.461 | 0.2  |
| 1318 | A | 0.312 | 0.25 |
| 1319 | U | 0.515 | 0.26 |
| 1320 | U | 0.814 | 0.26 |
| 1321 | U | 1.166 | 0.24 |
| 1322 | A | 0     | 0.01 |
| 1323 | C | 0.922 | 0    |
| 1324 | A | 0.475 | 0    |
| 1325 | G | 0.855 | 0.01 |
| 1326 | G | 0.868 | 0.01 |
| 1327 | A | 0.624 | 0.24 |
| 1328 | G | 0.868 | 0.28 |
| 1329 | A | 0.448 | 0.28 |
| 1330 | U | 0.42  | 0.27 |

|      |   |       |      |
|------|---|-------|------|
| 1331 | G | 0.271 | 0.22 |
| 1332 | G | 0.61  | 0.01 |
| 1333 | A | 0.176 | 0.01 |
| 1334 | U | 0.149 | 0.03 |
| 1335 | C | 0     | 0.05 |
| 1336 | C | 0.461 | 0.04 |
| 1337 | A | 0.529 | 0.02 |
| 1338 | A | 0.149 | 0    |
| 1339 | C | 0.203 | 0    |
| 1340 | U | 0.149 | 0.01 |
| 1341 | G | 0.054 | 0.01 |
| 1342 | G | 0.081 | 0.02 |
| 1343 | G | 0.109 | 0.02 |
| 1344 | G | 0.38  | 0    |
| 1345 | U | 0.081 | 0    |
| 1346 | U | 0.963 | 0.01 |
| 1347 | G | 0.068 | 0.01 |
| 1348 | C | 1.099 | 0.02 |
| 1349 | A | 1.044 | 0.02 |
| 1350 | A | 1.099 | 0    |
| 1351 | A | 1.072 | 0    |
| 1352 | A | 1.438 | 0    |
| 1353 | A | 0.583 | 0    |
| 1354 | U | 0.827 | 0.02 |
| 1355 | G | 0.353 | 0.02 |
| 1356 | U | 0.203 | 0.01 |
| 1357 | G | 0.068 | 0.01 |
| 1358 | U | 0.054 | 0    |
| 1359 | C | 0.312 | 0    |
| 1360 | A | 0.285 | 0    |
| 1361 | G | 0.732 | 0    |
| 1362 | A | 0.38  | 0    |
| 1363 | A | 0.054 | 0    |
| 1364 | U | 0.068 | 0.01 |
| 1365 | G | 0.109 | 0.01 |
| 1366 | U | 1.044 | 0.01 |
| 1367 | A | 0.719 | 0    |
| 1368 | U | 1.031 | 0    |
| 1369 | A | 0.502 | 0    |
| 1370 | A | 0.109 | 0    |
| 1371 | C | 0.149 | 0    |
| 1372 | C | 0.149 | 0    |
| 1373 | C | 0.624 | 0    |



|      |   |       |          |
|------|---|-------|----------|
| 1374 | A | 0.773 | 0        |
| 1375 | A | 0.339 | 0        |
| 1376 | C | 1.017 | 0        |
| 1377 | A | 0.936 | 0        |
| 1378 | A | 0.271 | 0        |
| 1379 | A | 0.054 | 0        |
| 1380 | C | 0.203 | 0        |
| 1381 | A | 0.136 | 0        |
| 1382 | U | 0.312 | 0.02     |
| 1383 | U | 0.068 | 0.02     |
| 1384 | C | 0.326 | 0.19     |
| 1385 | U | 1.397 | 0.97     |
| 1386 | A | 0.543 | 0.93     |
| 1387 | G | 0.624 | 0        |
| 1388 | A | 0.109 | 0        |
| 1389 | U | 0.922 | 2.70E-05 |
| 1390 | G | 0.841 | 0.01     |
| 1391 | U | 1.628 | 0.94     |
| 1392 | A | 1.017 | 0.95     |
| 1393 | A | 1.248 | 0.16     |
| 1394 | A | 1.085 | 0.01     |
| 1395 | A | 0.705 | 0        |
| 1396 | C | 1.356 | 0        |
| 1397 | A | 1.004 | 0        |
| 1398 | A | 0.868 | 0.01     |
| 1399 | G | 0.163 | 0.01     |
| 1400 | G | 0.041 | 0.01     |
| 1401 | G | 0.014 | 0        |
| 1402 | C | 0.203 | 0        |
| 1403 | C | 1.207 | 0        |
| 1404 | A | 1.411 | 0        |
| 1405 | A | 1.383 | 0        |
| 1406 | A | 1.234 | 0        |
| 1407 | A | 0.705 | 0        |
| 1408 | G | 1.383 | 0        |
| 1409 | A | 0.041 | 0        |
| 1410 | G | 0.054 | 0        |
| 1411 | C | 0.271 | 0.01     |
| 1412 | C | 0.773 | 0.01     |
| 1413 | A | 0.515 | 0.01     |
| 1414 | U | 0.692 | 0.19     |
| 1415 | U | 0.8   | 0.22     |
| 1416 | U | 1.126 | 0.32     |

|      |   |       |      |
|------|---|-------|------|
| 1417 | C | 1.37  | 0.32 |
| 1418 | A | 1.112 | 0.21 |
| 1419 | G | 0.855 | 0.46 |
| 1420 | A | 0.326 | 0.35 |
| 1421 | G | 0.109 | 0.51 |
| 1422 | C | 0.624 | 0.55 |
| 1423 | U | 0.963 | 0.59 |
| 1424 | A | 0.434 | 0.1  |
| 1425 | U | 0.366 | 0.9  |
| 1426 | G | 0.42  | 0.98 |
| 1427 | U | 0.543 | 0.99 |
| 1428 | A | 0.488 | 0.99 |
| 1429 | G | 0.203 | 0.99 |
| 1430 | A | 0.149 | 0.87 |
| 1431 | C | 0.922 | 0    |
| 1432 | A | 0.8   | 0    |
| 1433 | G | 0.42  | 0    |
| 1434 | G | 0.597 | 0    |
| 1435 | U | 0.041 | 0    |
| 1436 | U | 0.014 | 0.87 |
| 1437 | C | 0.041 | 0.99 |
| 1438 | U | 0.122 | 1    |
| 1439 | A | 0.014 | 0.99 |
| 1440 | C | 0.76  | 0.98 |
| 1441 | A | 0.787 | 0.9  |
| 1442 | A | 1.004 | 0.1  |
| 1443 | A | 0.787 | 0.09 |
| 1444 | A | 0.21  | 0.5  |
| 1445 | G | 0.597 | 0.55 |
| 1446 | U | 1.533 | 0.51 |
| 1447 | U | 1.458 | 0.64 |
| 1448 | U | 0.97  | 0.58 |
| 1449 | A | 1.2   | 0.04 |
| 1450 | A | 0.556 | 0.03 |
| 1451 | G | 0.366 | 0.39 |
| 1452 | A | 0.658 | 0.4  |
| 1453 | G | 1.004 | 0.08 |
| 1454 | C | 1.017 | 0.2  |
| 1455 | A | 0.787 | 0.25 |
| 1456 | G | 0.644 | 0.17 |
| 1457 | A | 0.109 | 0.06 |
| 1458 | A | 0.895 | 0.06 |
| 1459 | C | 0.529 | 0.11 |

|      |   |       |      |
|------|---|-------|------|
| 1460 | A | 0.583 | 0.17 |
| 1461 | G | 0     | 0.19 |
| 1462 | A | 0.515 | 0.13 |
| 1463 | C | 0.136 | 0.21 |
| 1464 | A | 0.895 | 0.22 |
| 1465 | G | 0.42  | 0.17 |
| 1466 | A | 0.488 | 0.06 |
| 1467 | U | 0     | 0.11 |
| 1468 | G | 0.326 | 0.16 |
| 1469 | C | 0.095 | 0.13 |
| 1470 | A | 0.326 | 0.11 |
| 1471 | G | 0     | 0.03 |
| 1472 | C | 0.258 | 0.13 |
| 1473 | A | 0.678 | 0.15 |
| 1474 | G | 0.285 | 0.17 |
| 1475 | U | 0.895 | 0.17 |
| 1476 | A | 0.99  | 0.06 |
| 1477 | A | 0.583 | 0.04 |
| 1478 | A | 0.38  | 0    |
| 1479 | G | 0.909 | 0    |
| 1480 | A | 0.651 | 0.01 |
| 1481 | A | 0.515 | 0.03 |
| 1482 | U | 0.529 | 0.24 |
| 1483 | U | 0.922 | 0.34 |
| 1484 | G | 0.692 | 0.24 |
| 1485 | G | 0.393 | 0.1  |
| 1486 | A | 0.665 | 0.02 |
| 1487 | U | 0.285 | 0.17 |
| 1488 | G | 0.326 | 0.24 |
| 1489 | A | 0.76  | 0.07 |
| 1490 | C | 0.231 | 0.01 |
| 1491 | U | 0.637 | 0.01 |
| 1492 | C | 0.176 | 0.01 |
| 1493 | A | 0.678 | 0.01 |
| 1494 | A | 0.176 | 0    |
| 1495 | A | 0.461 | 0    |
| 1496 | C | 0.244 | 0    |
| 1497 | A | 0     | 0    |
| 1498 | C | 0.353 | 0    |
| 1499 | U | 0     | 0    |
| 1500 | G | 0.353 | 0    |
| 1501 | C | 0.136 | 0.01 |
| 1502 | U | 0.448 | 0.01 |

|      |   |       |      |
|------|---|-------|------|
| 1503 | G | 1.044 | 0.01 |
| 1504 | A | 0.244 | 0.05 |
| 1505 | U | 1.397 | 0.07 |
| 1506 | U | 0.461 | 0.04 |
| 1507 | C | 0.827 | 0.04 |
| 1508 | A | 0.963 | 0.01 |
| 1509 | A | 1.099 | 0    |
| 1510 | A | 0.448 | 0    |
| 1511 | A | 0.339 | 0.06 |
| 1512 | U | 0.963 | 0.76 |
| 1513 | G | 1.465 | 0.7  |
| 1514 | C | 0.963 | 0.01 |
| 1515 | U | 0.597 | 0    |
| 1516 | A | 0.095 | 0.02 |
| 1517 | A | 0     | 0.01 |
| 1518 | C | 0.61  | 0    |
| 1519 | C | 0.461 | 0.01 |
| 1520 | C | 0.57  | 0.7  |
| 1521 | A | 1.56  | 0.7  |
| 1522 | G | 0.678 | 0.04 |
| 1523 | A | 1.56  | 0.03 |
| 1524 | U | 0.814 | 0.01 |
| 1525 | U | 0.732 | 0.02 |
| 1526 | G | 0.895 | 0.03 |
| 1527 | C | 0.136 | 0.01 |
| 1528 | A | 0     | 0.02 |
| 1529 | A | 0.109 | 0.01 |
| 1530 | G | 0.42  | 0.01 |
| 1531 | C | 0.637 | 0.1  |
| 1532 | U | 0.746 | 0.11 |
| 1533 | A | 0.407 | 0.08 |
| 1534 | G | 0.719 | 0.02 |
| 1535 | U | 0.583 | 0.01 |
| 1536 | G | 0.705 | 0.01 |
| 1537 | C | 0.624 | 0.03 |
| 1538 | U | 0.909 | 0.09 |
| 1539 | G | 1.166 | 0.1  |
| 1540 | A | 0.285 | 0.13 |
| 1541 | A | 0.651 | 0.06 |
| 1542 | G | 0.312 | 0    |
| 1543 | G | 0.38  | 0.01 |
| 1544 | G | 0.705 | 0.02 |
| 1545 | G | 0.461 | 0.01 |

|      |   |       |      |
|------|---|-------|------|
| 1546 | C | 1.18  | 0.13 |
| 1547 | U | 0.366 | 0.37 |
| 1548 | G | 0.217 | 0.33 |
| 1549 | G | 0.597 | 0.42 |
| 1550 | G | 7.352 | 0.32 |
| 1551 | U | 1.261 | 0.02 |
| 1552 | G | 1.818 | 0    |
| 1553 | U | 1.356 | 0.06 |
| 1554 | G | 1.356 | 0.06 |
| 1555 | A | 0.773 | 0.01 |
| 1556 | A | 0.19  | 0.01 |
| 1557 | U | 0     | 0.05 |
| 1558 | C | 0     | 0.14 |
| 1559 | C | 0.136 | 0.12 |
| 1560 | C | 0.19  | 0.08 |
| 1561 | A | 0.014 | 0.07 |
| 1562 | C | 1.261 | 0.01 |
| 1563 | C | 1.261 | 0.17 |
| 1564 | C | 1.655 | 0.3  |
| 1565 | U | 1.194 | 0.34 |
| 1566 | A | 1.329 | 0.33 |
| 1567 | G | 1.492 | 0.09 |
| 1568 | A | 0.841 | 0.01 |
| 1569 | A | 1.506 | 0.01 |
| 1570 | G | 0.963 | 0.01 |
| 1571 | A | 0.99  | 0.04 |
| 1572 | A | 0.637 | 0.04 |
| 1573 | A | 0.543 | 0    |
| 1574 | U | 0.054 | 0    |
| 1575 | G | 0.176 | 0    |
| 1576 | C | 0.922 | 0.02 |
| 1577 | U | 0.76  | 0.02 |
| 1578 | G | 0.556 | 0    |
| 1579 | A | 0.271 | 0    |
| 1580 | C | 0.475 | 0    |
| 1581 | G | 0.203 | 0    |
| 1582 | G | 0.407 | 0    |
| 1583 | C | 0.732 | 0.12 |
| 1584 | U | 1.153 | 0.14 |
| 1585 | U | 1.004 | 0.13 |
| 1586 | G | 0.787 | 0.1  |
| 1587 | U | 1.112 | 0.1  |
| 1588 | C | 0.719 | 0.1  |

|      |   |       |      |
|------|---|-------|------|
| 1589 | A | 0.543 | 0.1  |
| 1590 | A | 0.258 | 0.13 |
| 1591 | G | 0.57  | 0.14 |
| 1592 | G | 0.217 | 0.12 |
| 1593 | A | 1.017 | 0.01 |
| 1594 | G | 0.583 | 0.02 |
| 1595 | U | 0.787 | 0.97 |
| 1596 | A | 0     | 0.97 |
| 1597 | G | 0.176 | 0.13 |
| 1598 | G | 0.597 | 0.11 |
| 1599 | G | 0.19  | 0.94 |
| 1600 | G | 0.163 | 0.95 |
| 1601 | G | 0.271 | 0.82 |
| 1602 | G | 0.298 | 0.02 |
| 1603 | C | 0.882 | 0.76 |
| 1604 | C | 0.502 | 0.84 |
| 1605 | G | 0.787 | 0.8  |
| 1606 | G | 0.231 | 0.26 |
| 1607 | G | 0.149 | 0.17 |
| 1608 | A | 0.271 | 0.01 |
| 1609 | C | 0.665 | 0.06 |
| 1610 | A | 0.163 | 0.06 |
| 1611 | G | 0.787 | 0.08 |
| 1612 | A | 0.393 | 0.12 |
| 1613 | A | 2.889 | 0.09 |
| 1614 | G | 0.339 | 0.43 |
| 1615 | G | 0.665 | 0.43 |
| 1616 | C | 1.139 | 0.02 |
| 1617 | U | 0.502 | 0.01 |
| 1618 | A | 0.448 | 0.01 |
| 1619 | G | 0.597 | 0.01 |
| 1620 | A | 0.488 | 0.01 |
| 1621 | U | 0     | 0.85 |
| 1622 | U | 0.909 | 0.86 |
| 1623 | A | 1.261 | 0.04 |
| 1624 | A | 0.76  | 0.02 |
| 1625 | U | 0.339 | 0.77 |
| 1626 | G | 0.339 | 0.89 |
| 1627 | G | 0.38  | 0.8  |
| 1628 | C | 0.719 | 0.08 |
| 1629 | A | 0.732 | 0.02 |
| 1630 | G | 0.624 | 0.01 |
| 1631 | A | 0.57  | 0    |

|      |   |       |      |
|------|---|-------|------|
| 1632 | A | 0.231 | 0.02 |
| 1633 | G | 0.841 | 0.07 |
| 1634 | C | 0.597 | 0.86 |
| 1635 | C | 0.57  | 0.98 |
| 1636 | C | 1.112 | 0.98 |
| 1637 | U | 0.949 | 0.98 |
| 1638 | G | 0.773 | 0.96 |
| 1639 | A | 0.746 | 0.05 |
| 1640 | A | 1.261 | 0.05 |
| 1641 | A | 1.261 | 0.06 |
| 1642 | G | 0.312 | 0.06 |
| 1643 | A | 0.353 | 0.04 |
| 1644 | G | 0.285 | 0.04 |
| 1645 | G | 0.298 | 0.04 |
| 1646 | C | 0.339 | 0.04 |
| 1647 | C | 0.326 | 0.06 |
| 1648 | C | 0.244 | 0.06 |
| 1649 | U | 1.546 | 0.13 |
| 1650 | C | 0.895 | 0.12 |
| 1651 | G | 0.407 | 0.18 |
| 1652 | C | 0.258 | 0.38 |
| 1653 | A | 0.122 | 0.42 |
| 1654 | C | 0.515 | 0.79 |
| 1655 | C | 0.827 | 0.89 |
| 1656 | A | 0.909 | 0.85 |
| 1657 | G | 0.339 | 0.64 |
| 1658 | U | 0.407 | 0.41 |
| 1659 | G | 0.203 | 0.47 |
| 1660 | C | 0.054 | 0.48 |
| 1661 | C | 0.434 | 0.5  |
| 1662 | A | 0.258 | 0.51 |
| 1663 | A | 0.176 | 0.32 |
| 1664 | U | 0.176 | 0.54 |
| 1665 | C | 0.163 | 0.52 |
| 1666 | C | 0.407 | 0.5  |
| 1667 | C | 0.393 | 0.5  |
| 1668 | U | 0.787 | 0.51 |
| 1669 | U | 1.18  | 0.85 |
| 1670 | U | 1.044 | 0.95 |
| 1671 | U | 0.556 | 0.87 |
| 1672 | G | 0.068 | 0.77 |
| 1673 | C | 0.678 | 0.68 |
| 1674 | A | 0.203 | 0.62 |

|      |   |       |      |
|------|---|-------|------|
| 1675 | G | 0.203 | 0.64 |
| 1676 | C | 0.543 | 0.63 |
| 1677 | A | 0.109 | 0.89 |
| 1678 | G | 0.095 | 1    |
| 1679 | C | 0.217 | 1    |
| 1680 | C | 0.203 | 0.01 |
| 1681 | C | 0.298 | 0.08 |
| 1682 | A | 0.61  | 0.09 |
| 1683 | A | 0.502 | 0.06 |
| 1684 | C | 0     | 0.59 |
| 1685 | A | 0.407 | 0.71 |
| 1686 | G | 0.651 | 0.74 |
| 1687 | A | 0.922 | 0.78 |
| 1688 | G | 0.136 | 0.28 |
| 1689 | G | 0.203 | 0.36 |
| 1690 | G | 0.339 | 0.47 |
| 1691 | G | 0.814 | 0.4  |
| 1692 | A | 0.258 | 0.73 |
| 1693 | C | 0     | 0.82 |
| 1694 | C | 0.882 | 0.79 |
| 1695 | A | 1.601 | 0.05 |
| 1696 | A | 1.397 | 0.01 |
| 1697 | G | 1.072 | 0.01 |
| 1698 | A | 1.085 | 0    |
| 1699 | A | 0.868 | 0    |
| 1700 | A | 0.787 | 0.01 |
| 1701 | G | 0.543 | 0.01 |
| 1702 | C | 0.366 | 0.01 |
| 1703 | C | 0.271 | 0.98 |
| 1704 | A | 0.366 | 0.99 |
| 1705 | A | 0.339 | 0.24 |
| 1706 | U | 1.628 | 0.14 |
| 1707 | U | 0.97  | 0    |
| 1708 | A | 1.512 | 0    |
| 1709 | A | 0.556 | 0    |
| 1710 | G | 0.536 | 0.03 |
| 1711 | U | 0.156 | 0.72 |
| 1712 | G | 0.176 | 0.84 |
| 1713 | U | 0.271 | 0.21 |
| 1714 | U | 0.163 | 0.27 |
| 1715 | G | 0.326 | 0.26 |
| 1716 | G | 0.448 | 0.01 |
| 1717 | A | 0.563 | 0    |



|      |   |       |      |
|------|---|-------|------|
| 1718 | A | 0.726 | 0.02 |
| 1719 | U | 0.827 | 0.02 |
| 1720 | U | 0.814 | 0.02 |
| 1721 | G | 0.651 | 0.02 |
| 1722 | U | 0.827 | 0    |
| 1723 | G | 0.651 | 0    |
| 1724 | G | 0.705 | 0    |
| 1725 | G | 0.604 | 0    |
| 1726 | A | 0.814 | 0    |
| 1727 | A | 1.241 | 0    |
| 1728 | A | 1.295 | 0    |
| 1729 | G | 1.316 | 0    |
| 1730 | A | 0.814 | 0    |
| 1731 | G | 1.153 | 0    |
| 1732 | G | 0.665 | 0    |
| 1733 | G | 0.597 | 0    |
| 1734 | A | 0.393 | 0    |
| 1735 | C | 0.081 | 0    |
| 1736 | A | 0.19  | 0    |
| 1737 | C | 0.068 | 0    |
| 1738 | U | 0.122 | 0.01 |
| 1739 | C | 0.176 | 0.01 |
| 1740 | U | 0.122 | 0.01 |
| 1741 | G | 0.488 | 0.01 |
| 1742 | C | 1.37  | 0.01 |
| 1743 | A | 1.356 | 0    |
| 1744 | A | 1.506 | 0    |
| 1745 | G | 0.773 | 0.01 |
| 1746 | G | 0.882 | 0    |
| 1747 | C | 1.994 | 0    |
| 1748 | A | 0.448 | 0    |
| 1749 | A | 0.136 | 0    |
| 1750 | U | 0.136 | 0.01 |
| 1751 | G | 0.203 | 0.02 |
| 1752 | C | 0.244 | 0.09 |
| 1753 | A | 0.203 | 0.19 |
| 1754 | G | 0.42  | 0.18 |
| 1755 | A | 0.339 | 0.16 |
| 1756 | G | 0.163 | 0.18 |
| 1757 | C | 0.149 | 0.16 |
| 1758 | C | 0.014 | 0.03 |
| 1759 | C | 0.081 | 0.32 |
| 1760 | C | 0.99  | 0.5  |

|      |   |       |      |
|------|---|-------|------|
| 1761 | A | 1.275 | 0.43 |
| 1762 | A | 1.275 | 0.38 |
| 1763 | G | 1.533 | 0.46 |
| 1764 | A | 1.248 | 0.33 |
| 1765 | A | 1.275 | 0.31 |
| 1766 | G | 0.922 | 0.21 |
| 1767 | A | 1.926 | 0.09 |
| 1768 | C | 1.194 | 0.44 |
| 1769 | A | 0.353 | 0.44 |
| 1770 | G | 0.258 | 0.45 |
| 1771 | G | 0.258 | 0.22 |
| 1772 | G | 0.488 | 0.16 |
| 1773 | A | 0.271 | 0.03 |
| 1774 | U | 0.244 | 0.32 |
| 1775 | G | 0.136 | 0.48 |
| 1776 | C | 0.244 | 0.82 |
| 1777 | U | 0.38  | 0.82 |
| 1778 | G | 0.8   | 0.67 |
| 1779 | G | 0.61  | 0.4  |
| 1780 | A | 0.76  | 0.2  |
| 1781 | A | 0.787 | 0.17 |
| 1782 | A | 0.353 | 0.71 |
| 1783 | U | 0.515 | 0.8  |
| 1784 | G | 0.515 | 0.83 |
| 1785 | U | 0.407 | 0.8  |
| 1786 | G | 0.366 | 0.71 |
| 1787 | G | 0.8   | 0.11 |
| 1788 | A | 1.397 | 0.02 |
| 1789 | A | 1.533 | 0.01 |
| 1790 | A | 1.261 | 0    |
| 1791 | A | 1.289 | 0.01 |
| 1792 | A | 0.624 | 0.07 |
| 1793 | U | 0.366 | 0.12 |
| 1794 | G | 0.122 | 0.15 |
| 1795 | G | 1.302 | 0.1  |
| 1796 | A | 0     | 0.07 |
| 1797 | C | 0.054 | 0.18 |
| 1798 | C | 0.081 | 0.77 |
| 1799 | A | 0.42  | 0.86 |
| 1800 | U | 0.353 | 0.83 |
| 1801 | G | 1.316 | 0.76 |
| 1802 | U | 0.637 | 0.7  |
| 1803 | U | 1.397 | 0.15 |

|      |   |       |      |
|------|---|-------|------|
| 1804 | A | 1.777 | 0.18 |
| 1805 | U | 0.814 | 0.25 |
| 1806 | G | 0.095 | 0.25 |
| 1807 | G | 0.054 | 0.15 |
| 1808 | C | 0.014 | 0.11 |
| 1809 | C | 0.203 | 0.31 |
| 1810 | A | 1.031 | 0.38 |
| 1811 | A | 0.895 | 0.35 |
| 1812 | A | 1.139 | 0.3  |
| 1813 | U | 0.814 | 0.79 |
| 1814 | G | 0.393 | 0.8  |
| 1815 | C | 0.122 | 0.76 |
| 1816 | C | 0.095 | 0.85 |
| 1817 | C | 0.217 | 0.2  |
| 1818 | A | 1.153 | 0.12 |
| 1819 | G | 1.234 | 0.1  |
| 1820 | A | 1.058 | 0.06 |
| 1821 | C | 1.56  | 0.06 |
| 1822 | A | 1.818 | 0.06 |
| 1823 | G | 0.651 | 0.05 |
| 1824 | A | 0.637 | 0.05 |
| 1825 | C | 0.556 | 0.09 |
| 1826 | A | 0.76  | 0.11 |
| 1827 | G | 0.258 | 0.81 |
| 1828 | G | 0.366 | 0.83 |
| 1829 | C | 0.393 | 0.83 |
| 1830 | G | 0.271 | 0.79 |
| 1831 | G | 0.624 | 0.26 |
| 1832 | G | 0.109 | 0.38 |
| 1833 | U | 0.298 | 0.7  |
| 1834 | U | 0.678 | 0.79 |
| 1835 | U | 0.909 | 0.81 |
| 1836 | U | 0.841 | 0.82 |
| 1837 | U | 1.044 | 0.79 |
| 1838 | U | 2.862 | 0.63 |
| 1839 | A | 2.306 | 0.26 |
| 1840 | G | 1.112 | 0.49 |
| 1841 | G | 0.095 | 0.49 |
| 1842 | C | 0.041 | 0.32 |
| 1843 | C | 0.095 | 0.41 |
| 1844 | U | 0.136 | 0.81 |
| 1845 | U | 0.176 | 0.95 |
| 1846 | G | 0.041 | 0.47 |

|      |   |       |      |
|------|---|-------|------|
| 1847 | G | 0.014 | 0.07 |
| 1848 | U | 0.163 | 0.05 |
| 1849 | C | 0.068 | 0.04 |
| 1850 | C | 0     | 0.04 |
| 1851 | A | 0.041 | 0.33 |
| 1852 | U | 0.095 | 0.88 |
| 1853 | G | 0.014 | 0.85 |
| 1854 | G | 0.054 | 0.72 |
| 1855 | G | 0.027 | 0.72 |
| 1856 | G | 0.027 | 0.78 |
| 1857 | A | 0.041 | 0.87 |
| 1858 | A | 0.122 | 0.83 |
| 1859 | A | 0.38  | 0.32 |
| 1860 | G | 0.597 | 0.36 |
| 1861 | A | 0.882 | 0.34 |
| 1862 | A | 0.285 | 0.27 |
| 1863 | G | 0.122 | 0.23 |
| 1864 | C | 0.407 | 0.2  |
| 1865 | C | 0     | 0.24 |
| 1866 | C | 0.054 | 0.23 |
| 1867 | C | 0.244 | 0.12 |
| 1868 | G | 0.217 | 0.13 |
| 1869 | C | 0.312 | 0.15 |
| 1870 | A | 0.475 | 0.14 |
| 1871 | A | 0.109 | 0.03 |
| 1872 | U | 0.068 | 0.17 |
| 1873 | U | 0.014 | 0.79 |
| 1874 | U | 0.041 | 0.84 |
| 1875 | C | 0.054 | 0.84 |
| 1876 | C | 0.027 | 0.76 |
| 1877 | C | 0     | 0.73 |
| 1878 | C | 0.041 | 0.65 |
| 1879 | A | 0     | 0.52 |
| 1880 | U | 0.095 | 0.25 |
| 1881 | G | 0     | 0.27 |
| 1882 | G | 0.014 | 0.67 |
| 1883 | C | 0.42  | 0.72 |
| 1884 | U | 0.095 | 0.34 |
| 1885 | C | 0.203 | 0.31 |
| 1886 | A | 0.068 | 0.68 |
| 1887 | A | 0.149 | 0.64 |
| 1888 | G | 0.122 | 0.62 |
| 1889 | U | 0.109 | 0.61 |

|      |   |       |      |
|------|---|-------|------|
| 1890 | G | 0.665 | 0.13 |
| 1891 | C | 0.075 | 0.56 |
| 1892 | A | 0.929 | 0.56 |
| 1893 | U | 0.644 | 0.19 |
| 1894 | C | 0.712 | 0.22 |
| 1895 | A | 1.194 | 0.22 |
| 1896 | G | 0.359 | 0.39 |
| 1897 | G | 0.163 | 0.73 |
| 1898 | G | 0.109 | 0.69 |
| 1899 | G | 0.244 | 0.19 |
| 1900 | C | 0.068 | 0.19 |
| 1901 | U | 0.142 | 0.51 |
| 1902 | G | 0.224 | 0.5  |
| 1903 | A | 0.42  | 0.15 |
| 1904 | U | 0.393 | 0.33 |
| 1905 | G | 0.217 | 0.4  |
| 1906 | C | 0.224 | 0.17 |
| 1907 | C | 0.61  | 0.15 |
| 1908 | A | 0.807 | 0.12 |
| 1909 | A | 0.936 | 0.06 |
| 1910 | C | 0.136 | 0.16 |
| 1911 | U | 0.156 | 0.42 |
| 1912 | G | 0.136 | 0.47 |
| 1913 | C | 0.054 | 0.43 |
| 1914 | U | 0.075 | 0.32 |
| 1915 | C | 0.068 | 0.22 |
| 1916 | C | 0.081 | 0.25 |
| 1917 | C | 0.047 | 0.2  |
| 1918 | C | 0.156 | 0.19 |
| 1919 | C | 0.183 | 0.12 |
| 1920 | A | 0.807 | 0.01 |
| 1921 | G | 0.983 | 0    |
| 1922 | A | 1.017 | 0    |
| 1923 | G | 0.631 | 0.05 |
| 1924 | G | 0.536 | 0.47 |
| 1925 | A | 0.841 | 0.53 |
| 1926 | C | 0.088 | 0.24 |
| 1927 | C | 0.054 | 0.15 |
| 1928 | C | 0.088 | 0.01 |
| 1929 | A | 0.373 | 0    |
| 1930 | G | 0.292 | 0.02 |
| 1931 | C | 0.136 | 0.05 |
| 1932 | U | 0.224 | 0.06 |

|      |   |       |          |
|------|---|-------|----------|
| 1933 | G | 0.285 | 0.45     |
| 1934 | U | 0.224 | 0.45     |
| 1935 | G | 0.414 | 0.14     |
| 1936 | G | 0.312 | 0.14     |
| 1937 | A | 0.604 | 0.1      |
| 1938 | U | 0.176 | 0.2      |
| 1939 | C | 0.088 | 0.13     |
| 1940 | U | 0.278 | 0.01     |
| 1941 | G | 0.366 | 0.03     |
| 1942 | C | 0.251 | 0.04     |
| 1943 | U | 0.943 | 0.04     |
| 1944 | A | 1.126 | 0.12     |
| 1945 | A | 1.146 | 0.09     |
| 1946 | A | 0.875 | 0.01     |
| 1947 | G | 0.807 | 0        |
| 1948 | A | 0.875 | 0        |
| 1949 | A | 0.529 | 0        |
| 1950 | C | 0.251 | 0.01     |
| 1951 | U | 0.685 | 0.01     |
| 1952 | A | 1.051 | 0        |
| 1953 | C | 0.332 | 0        |
| 1954 | A | 1.363 | 0        |
| 1955 | U | 0.78  | 0        |
| 1956 | G | 0.251 | 2.04E-05 |
| 1957 | C | 0.095 | 0        |
| 1958 | A | 0.237 | 0        |
| 1959 | G | 0.156 | 1.96E-05 |
| 1960 | U | 0.115 | 8.97E-05 |
| 1961 | U | 0.17  | 0        |
| 1962 | G | 0.441 | 0        |
| 1963 | G | 0.047 | 0        |
| 1964 | G | 0.17  | 0        |
| 1965 | C | 0.047 | 6.76E-05 |
| 1966 | A | 0.746 | 5.97E-05 |
| 1967 | A | 0.563 | 1.76E-05 |
| 1968 | G | 0.366 | 1.78E-05 |
| 1969 | C | 0.231 | 3.09E-05 |
| 1970 | A | 0.61  | 0        |
| 1971 | G | 0.624 | 0        |
| 1972 | C | 0.482 | 0        |
| 1973 | A | 0.495 | 0        |
| 1974 | G | 0.488 | 0        |
| 1975 | A | 0.753 | 0        |

|      |   |       |          |
|------|---|-------|----------|
| 1976 | G | 0.793 | 0        |
| 1977 | A | 1.153 | 0        |
| 1978 | G | 0.353 | 0        |
| 1979 | A | 0.827 | 0        |
| 1980 | A | 0.793 | 6.78E-06 |
| 1981 | A | 0.909 | 0        |
| 1982 | A | 1.004 | 0        |
| 1983 | G | 0.454 | 0        |
| 1984 | C | 0.387 | 0        |
| 1985 | A | 0.563 | 0        |
| 1986 | G | 0.42  | 0        |
| 1987 | A | 0.705 | 0        |
| 1988 | G | 0.834 | 0        |
| 1989 | A | 0.99  | 3.17E-05 |
| 1990 | G | 0.861 | 0        |
| 1991 | A | 0.943 | 0        |
| 1992 | A | 1.038 | 0        |
| 1993 | A | 1.017 | 0        |
| 1994 | G | 0.821 | 0        |
| 1995 | C | 0.414 | 0        |
| 1996 | A | 0.366 | 0.02     |
| 1997 | G | 0.366 | 0.07     |
| 1998 | A | 0.454 | 0.05     |
| 1999 | G | 0.556 | 0.05     |
| 2000 | A | 0.665 | 0.04     |
| 2001 | G | 0.543 | 0.05     |
| 2002 | A | 0.665 | 0.02     |
| 2003 | A | 0.773 | 0        |
| 2004 | G | 0.495 | 0.54     |
| 2005 | C | 0.21  | 0.59     |
| 2006 | C | 0.17  | 0.14     |
| 2007 | U | 0.461 | 0.17     |
| 2008 | U | 1.044 | 0.51     |
| 2009 | A | 2.179 | 0.48     |
| 2010 | C | 0.875 | 0.54     |
| 2011 | A | 1.261 | 0.64     |
| 2012 | A | 1.194 | 0.72     |
| 2013 | G | 1.958 | 0.7      |
| 2014 | G | 0.217 | 0.72     |
| 2015 | A | 0.104 | 0.58     |
| 2016 | G | 0.104 | 0.42     |
| 2017 | G | 0.298 | 0.08     |
| 2018 | U | 0.09  | 0.02     |

|      |   |       |      |
|------|---|-------|------|
| 2019 | G | 0.33  | 0.1  |
| 2020 | A | 1.885 | 0.26 |
| 2021 | C | 0.321 | 0.22 |
| 2022 | A | 0.289 | 0.41 |
| 2023 | G | 0.511 | 0.78 |
| 2024 | A | 0.538 | 0.89 |
| 2025 | G | 0.624 | 0.85 |
| 2026 | G | 1.13  | 0.64 |
| 2027 | A | 1.546 | 0.36 |
| 2028 | U | 0.61  | 0.11 |
| 2029 | U | 0.995 | 0.66 |
| 2030 | U | 0.606 | 0.68 |
| 2031 | G | 0.425 | 0.66 |
| 2032 | C | 0.09  | 0.03 |
| 2033 | U | 0.063 | 0.06 |
| 2034 | G | 0.226 | 0.05 |
| 2035 | C | 0.208 | 0.01 |
| 2036 | A | 0.181 | 0.01 |
| 2037 | C | 0.131 | 0.23 |
| 2038 | C | 0     | 0.25 |
| 2039 | U | 0.099 | 0.25 |
| 2040 | C | 0.172 | 0.88 |
| 2041 | A | 1.456 | 0.73 |
| 2042 | A | 1.275 | 0.7  |
| 2043 | U | 0.095 | 0.46 |
| 2044 | U | 0.081 | 0.72 |
| 2045 | C | 0.045 | 0.84 |
| 2046 | U | 0.086 | 0.79 |
| 2047 | C | 0.045 | 0.89 |
| 2048 | U | 0.099 | 0.9  |
| 2049 | C | 0.118 | 0.88 |
| 2050 | U | 0.497 | 0.91 |
| 2051 | U | 1.397 | 0.9  |
| 2052 | U | 0.999 | 0.9  |
| 2053 | G | 0.493 | 0.62 |
| 2054 | G | 0.583 | 0.38 |
| 2055 | A | 0.606 | 0.06 |
| 2056 | G | 0.434 | 0.03 |
| 2057 | G | 0.42  | 0.09 |
| 2058 | A | 0.502 | 0.13 |
| 2059 | G | 0.52  | 0.37 |
| 2060 | A | 0.665 | 0.39 |
| 2061 | C | 0.357 | 0.61 |



|      |   |       |      |
|------|---|-------|------|
| 2062 | C | 0.353 | 0.26 |
| 2063 | A | 0.244 | 0.19 |
| 2064 | G | 0.538 | 0.31 |
| 2065 | U | 0.741 | 0.37 |
| 2066 | A | 0.651 | 0.29 |
| 2067 | G | 0.316 | 0.84 |
| 2068 | U | 0.185 | 0.87 |
| 2069 | C | 0.172 | 0.39 |
| 2070 | A | 0.181 | 0.08 |
| 2071 | C | 0.14  | 0.05 |
| 2072 | U | 0.075 | 0.11 |
| 2073 | G | 0.109 | 0.13 |
| 2074 | C | 0.054 | 0.07 |
| 2075 | U | 0.163 | 0.07 |
| 2076 | C | 0.142 | 0.29 |
| 2077 | A | 0.78  | 0.27 |
| 2078 | U | 0.685 | 0.09 |
| 2079 | A | 0.8   | 0.36 |
| 2080 | U | 0.448 | 0.6  |
| 2081 | U | 0.576 | 0.43 |
| 2082 | G | 0.929 | 0.26 |
| 2083 | A | 0.875 | 0.08 |
| 2084 | A | 1.072 | 0.08 |
| 2085 | G | 0.631 | 0.09 |
| 2086 | G | 0.617 | 0.27 |
| 2087 | A | 0.461 | 0.26 |
| 2088 | C | 0.102 | 0.25 |
| 2089 | A | 0.258 | 0.24 |
| 2090 | G | 0.305 | 0.16 |
| 2091 | C | 0.095 | 0.37 |
| 2092 | C | 0.081 | 0.34 |
| 2093 | U | 0.068 | 0.64 |
| 2094 | G | 0.59  | 0.75 |
| 2095 | U | 0.556 | 0.8  |
| 2096 | A | 0.793 | 0.74 |
| 2097 | G | 0.827 | 0.63 |
| 2098 | A | 1.017 | 0.04 |
| 2099 | A | 0.773 | 0.05 |
| 2100 | G | 0.292 | 0.09 |
| 2101 | U | 0.427 | 0.26 |
| 2102 | A | 0.61  | 0.21 |
| 2103 | U | 0.319 | 0.9  |
| 2104 | U | 0.746 | 0.98 |

|      |   |       |      |
|------|---|-------|------|
| 2105 | A | 1.038 | 0.98 |
| 2106 | C | 0.163 | 0.98 |
| 2107 | U | 0.21  | 0.91 |
| 2108 | G | 0.407 | 0.29 |
| 2109 | G | 0.576 | 0.04 |
| 2110 | A | 0.827 | 0.03 |
| 2111 | U | 0.393 | 0.04 |
| 2112 | A | 0.475 | 0.04 |
| 2113 | C | 0.068 | 0.02 |
| 2114 | A | 0.549 | 0.02 |
| 2115 | G | 1.472 | 0.14 |
| 2116 | G | 0.041 | 0.3  |
| 2117 | G | 0.068 | 0.19 |
| 2118 | G | 0.19  | 0.24 |
| 2119 | C | 0.027 | 0.61 |
| 2120 | U | 0.217 | 0.87 |
| 2121 | G | 0.407 | 0.68 |
| 2122 | A | 0.895 | 0.36 |
| 2123 | U | 0.57  | 0.26 |
| 2124 | G | 0.298 | 0.05 |
| 2125 | A | 0.271 | 0.38 |
| 2126 | U | 0.122 | 0.6  |
| 2127 | U | 0     | 0.8  |
| 2128 | C | 0     | 0.28 |
| 2129 | U | 0.068 | 0.28 |
| 2130 | A | 0.19  | 0.25 |
| 2131 | U | 0.312 | 0.36 |
| 2132 | U | 0.393 | 0.57 |
| 2133 | G | 2.455 | 0.59 |
| 2134 | U | 0.868 | 0.63 |
| 2135 | A | 0.61  | 0.38 |
| 2136 | A | 0.814 | 0.28 |
| 2137 | C | 0     | 0.35 |
| 2138 | A | 0.705 | 0.25 |
| 2139 | G | 0.746 | 0.31 |
| 2140 | G | 1.072 | 0.15 |
| 2141 | A | 0.353 | 0.07 |
| 2142 | A | 0.203 | 0.17 |
| 2143 | U | 0.217 | 0.44 |
| 2144 | A | 0.258 | 0.4  |
| 2145 | G | 0.231 | 0.15 |
| 2146 | A | 0.19  | 0.29 |
| 2147 | G | 0.136 | 0.68 |

|      |   |       |      |
|------|---|-------|------|
| 2148 | U | 0.149 | 0.79 |
| 2149 | U | 0.285 | 0.83 |
| 2150 | A | 1.438 | 0.46 |
| 2151 | G | 0.244 | 0.35 |
| 2152 | G | 0.109 | 0.16 |
| 2153 | U | 0.122 | 0.03 |
| 2154 | C | 0.041 | 0.04 |
| 2155 | C | 0.027 | 0.04 |
| 2156 | A | 0.461 | 0.05 |
| 2157 | C | 0     | 0.25 |
| 2158 | A | 0.814 | 0.55 |
| 2159 | U | 0.38  | 0.75 |
| 2160 | U | 0.231 | 0.76 |
| 2161 | A | 0.882 | 0.3  |
| 2162 | U | 0.298 | 0.13 |
| 2163 | A | 0.42  | 0.08 |
| 2164 | C | 0.068 | 0.09 |
| 2165 | C | 0.014 | 0.46 |
| 2166 | C | 0     | 0.6  |
| 2167 | C | 0.014 | 0.28 |
| 2168 | A | 0.651 | 0.11 |
| 2169 | A | 0.705 | 0.1  |
| 2170 | A | 0.637 | 0.06 |
| 2171 | A | 0.719 | 0.12 |
| 2172 | A | 1.072 | 0.14 |
| 2173 | U | 0.244 | 0.45 |
| 2174 | A | 0.936 | 0.39 |
| 2175 | G | 0.773 | 0.43 |
| 2176 | U | 0.298 | 0.52 |
| 2177 | A | 0.855 | 0.38 |
| 2178 | G | 0.285 | 0.48 |
| 2179 | G | 0.583 | 0.46 |
| 2180 | A | 0.705 | 0.23 |
| 2181 | G | 0.298 | 0.18 |
| 2182 | G | 0.326 | 0.38 |
| 2183 | A | 0.583 | 0.6  |
| 2184 | A | 0.637 | 0.63 |
| 2185 | U | 0.231 | 0.7  |
| 2186 | A | 0.909 | 0.68 |
| 2187 | G | 0.42  | 0.52 |
| 2188 | G | 0.719 | 0.53 |
| 2189 | A | 0.556 | 0.5  |
| 2190 | G | 0.163 | 0.44 |

|      |   |       |      |
|------|---|-------|------|
| 2191 | G | 0.19  | 0.44 |
| 2192 | U | 0.136 | 0.59 |
| 2193 | U | 0.353 | 0.77 |
| 2194 | U | 0.502 | 0.79 |
| 2195 | U | 0.244 | 0.41 |
| 2196 | A | 0.827 | 0.35 |
| 2197 | U | 0.393 | 0.5  |
| 2198 | U | 0.393 | 0.4  |
| 2199 | A | 0.922 | 0.27 |
| 2200 | A | 1.004 | 0.21 |
| 2201 | U | 0.515 | 0.19 |
| 2202 | A | 0.665 | 0.24 |
| 2203 | C | 0.136 | 0.24 |
| 2204 | U | 0.597 | 0.15 |
| 2205 | A | 1.031 | 0.16 |
| 2206 | A | 0.99  | 0.18 |
| 2207 | A | 1.031 | 0.18 |
| 2208 | G | 0.99  | 0.18 |
| 2209 | A | 1.031 | 0.22 |
| 2210 | A | 1.438 | 0.41 |
| 2211 | U | 0.597 | 0.72 |
| 2212 | A | 0.732 | 0.58 |
| 2213 | C | 0.244 | 0.53 |
| 2214 | A | 1.044 | 0.46 |
| 2215 | A | 0.76  | 0.1  |
| 2216 | A | 1.017 | 0.09 |
| 2217 | A | 0.909 | 0.1  |
| 2218 | A | 1.044 | 0.32 |
| 2219 | U | 0.488 | 0.87 |
| 2220 | G | 0.461 | 0.73 |
| 2221 | U | 0.285 | 0.77 |
| 2222 | A | 0.895 | 0.55 |
| 2223 | G | 1.044 | 0.12 |
| 2224 | A | 0.99  | 0.1  |
| 2225 | A | 0.882 | 0.13 |
| 2226 | A | 0.963 | 0.37 |
| 2227 | U | 0.787 | 0.63 |
| 2228 | A | 1.356 | 0.44 |
| 2229 | G | 1.072 | 0.18 |
| 2230 | A | 1.234 | 0.23 |
| 2231 | A | 1.18  | 0.25 |
| 2232 | G | 0.705 | 0.49 |
| 2233 | U | 0.434 | 0.55 |

|      |   |       |      |
|------|---|-------|------|
| 2234 | U | 0.393 | 0.15 |
| 2235 | U | 0.76  | 0.19 |
| 2236 | U | 0.977 | 0.25 |
| 2237 | A | 1.058 | 0.18 |
| 2238 | G | 0.515 | 0.06 |
| 2239 | G | 0.543 | 0.1  |
| 2240 | C | 0.434 | 0.46 |
| 2241 | A | 0.949 | 0.47 |
| 2242 | A | 0.868 | 0.15 |
| 2243 | A | 1.221 | 0.17 |
| 2244 | A | 1.248 | 0.16 |
| 2245 | G | 0.949 | 0.12 |
| 2246 | G | 0.76  | 0.09 |
| 2247 | A | 0.855 | 0.16 |
| 2248 | U | 1.004 | 0.81 |
| 2249 | U | 1.573 | 0.78 |
| 2250 | A | 1.533 | 0.25 |
| 2251 | A | 1.37  | 0.09 |
| 2252 | A | 1.465 | 0.04 |
| 2253 | G | 0.298 | 0.04 |
| 2254 | G | 0.231 | 0.05 |
| 2255 | G | 0.244 | 0.05 |
| 2256 | A | 0.42  | 0.06 |
| 2257 | C | 0.326 | 0.09 |
| 2258 | A | 0.678 | 0.11 |
| 2259 | A | 0.61  | 0.15 |
| 2260 | U | 0.543 | 0.73 |
| 2261 | C | 0.692 | 0.74 |
| 2262 | A | 1.37  | 0.25 |
| 2263 | U | 0.732 | 0.22 |
| 2264 | G | 1.289 | 0.17 |
| 2265 | A | 1.356 | 0.17 |
| 2266 | C | 0.787 | 0.17 |
| 2267 | A | 1.451 | 0.18 |
| 2268 | G | 0.515 | 0.19 |
| 2269 | G | 0.068 | 0.18 |
| 2270 | G | 0.041 | 0.14 |
| 2271 | G | 0.095 | 0.14 |
| 2272 | A | 0.298 | 0.14 |
| 2273 | C | 0.122 | 0.14 |
| 2274 | A | 0.231 | 0.14 |
| 2275 | C | 0.054 | 0.14 |
| 2276 | C | 0.027 | 0.15 |

|      |   |       |      |
|------|---|-------|------|
| 2277 | C | 0.014 | 0.2  |
| 2278 | C | 0.122 | 0.21 |
| 2279 | G | 0.773 | 0.22 |
| 2280 | A | 1.058 | 0.13 |
| 2281 | U | 0.637 | 0.1  |
| 2282 | U | 1.031 | 0.05 |
| 2283 | A | 0.787 | 0.09 |
| 2284 | A | 0.57  | 0.11 |
| 2285 | C | 0.42  | 0.08 |
| 2286 | A | 0.393 | 0.06 |
| 2287 | U | 0.353 | 0.14 |
| 2288 | U | 0.203 | 0.13 |
| 2289 | U | 0.258 | 0.39 |
| 2290 | U | 0.448 | 0.75 |
| 2291 | U | 0.732 | 0.91 |
| 2292 | G | 0.8   | 0.77 |
| 2293 | G | 1.139 | 0.75 |
| 2294 | U | 0.99  | 0.32 |
| 2295 | A | 1.397 | 0.53 |
| 2296 | G | 1.628 | 0.49 |
| 2297 | A | 1.112 | 0.27 |
| 2298 | A | 0.895 | 0.41 |
| 2299 | A | 0.624 | 0.3  |
| 2300 | U | 0.393 | 0.11 |
| 2301 | U | 0.448 | 0.18 |
| 2302 | U | 0.271 | 0.27 |
| 2303 | G | 0.136 | 0.48 |
| 2304 | C | 0.095 | 0.79 |
| 2305 | U | 0.434 | 0.8  |
| 2306 | A | 0.732 | 0.6  |
| 2307 | A | 1.004 | 0.5  |
| 2308 | C | 0.705 | 0.05 |
| 2309 | A | 0.787 | 0.05 |
| 2310 | G | 0.692 | 0.03 |
| 2311 | C | 0.488 | 0.05 |
| 2312 | U | 0.38  | 0.04 |
| 2313 | C | 0.312 | 0.46 |
| 2314 | U | 0.515 | 0.63 |
| 2315 | G | 0.122 | 0.58 |
| 2316 | G | 0.014 | 0.53 |
| 2317 | G | 0     | 0.16 |
| 2318 | G | 0.041 | 0.06 |
| 2319 | A | 1.126 | 0.17 |

|      |   |       |      |
|------|---|-------|------|
| 2320 | U | 0.136 | 0.23 |
| 2321 | G | 0.136 | 0.21 |
| 2322 | U | 0.109 | 0.08 |
| 2323 | C | 0.109 | 0.04 |
| 2324 | U | 0.271 | 0.1  |
| 2325 | C | 0.217 | 0.59 |
| 2326 | U | 0.841 | 0.69 |
| 2327 | A | 1.533 | 0.71 |
| 2328 | A | 1.058 | 0.58 |
| 2329 | A | 0.882 | 0.43 |
| 2330 | U | 0.461 | 0.32 |
| 2331 | U | 0.231 | 0.81 |
| 2332 | U | 0.19  | 0.68 |
| 2333 | U | 0.095 | 0.28 |
| 2334 | C | 0.054 | 0.48 |
| 2335 | C | 0.041 | 0.53 |
| 2336 | C | 0.109 | 0.54 |
| 2337 | A | 0.502 | 0.38 |
| 2338 | U | 0.597 | 0.22 |
| 2339 | A | 0.624 | 0.28 |
| 2340 | G | 0.298 | 0.22 |
| 2341 | C | 0.109 | 0.18 |
| 2342 | U | 1.031 | 0.25 |
| 2343 | A | 1.377 | 0.36 |
| 2344 | A | 1.234 | 0.39 |
| 2345 | A | 1.268 | 0.26 |
| 2346 | G | 0.692 | 0.05 |
| 2347 | U | 0.977 | 0.96 |
| 2348 | A | 1.194 | 0.94 |
| 2349 | G | 0.936 | 0.02 |
| 2350 | A | 0.99  | 0.01 |
| 2351 | G | 0.264 | 0.01 |
| 2352 | C | 0.136 | 0.01 |
| 2353 | C | 0.17  | 0.01 |
| 2354 | U | 0.041 | 0.02 |
| 2355 | G | 0.956 | 0.02 |
| 2356 | U | 1.004 | 0.94 |
| 2357 | A | 1.79  | 0.94 |
| 2358 | A | 1.289 | 0.02 |
| 2359 | A | 1.39  | 0.02 |
| 2360 | A | 1.336 | 0.01 |
| 2361 | G | 0.536 | 0.01 |
| 2362 | U | 0.353 | 0.03 |

|      |   |       |      |
|------|---|-------|------|
| 2363 | C | 0.38  | 0.03 |
| 2364 | G | 0.319 | 0    |
| 2365 | C | 0.136 | 0    |
| 2366 | C | 0.034 | 0.03 |
| 2367 | U | 0.448 | 0.74 |
| 2368 | U | 1.397 | 0.98 |
| 2369 | A | 1.546 | 0.28 |
| 2370 | A | 1.35  | 0.02 |
| 2371 | A | 1.194 | 0.01 |
| 2372 | G | 0.366 | 0.01 |
| 2373 | C | 0.176 | 0.02 |
| 2374 | C | 0.136 | 0.09 |
| 2375 | A | 0.583 | 0.33 |
| 2376 | G | 0.895 | 0.44 |
| 2377 | G | 0.909 | 0.45 |
| 2378 | A | 1.18  | 0.33 |
| 2379 | A | 1.329 | 0.14 |
| 2380 | A | 0.855 | 0.08 |
| 2381 | G | 0.624 | 0.01 |
| 2382 | G | 0.543 | 0.02 |
| 2383 | A | 1.18  | 0.02 |
| 2384 | U | 0.393 | 0.02 |
| 2385 | G | 0.38  | 0.08 |
| 2386 | G | 0.285 | 0.28 |
| 2387 | A | 1.004 | 0.27 |
| 2388 | C | 0     | 0.92 |
| 2389 | C | 0.271 | 0.95 |
| 2390 | A | 0.732 | 0.89 |
| 2391 | A | 0.787 | 0.02 |
| 2392 | A | 0.922 | 0.02 |
| 2393 | A | 0.719 | 0.01 |
| 2394 | U | 0.637 | 0.03 |
| 2395 | U | 0.434 | 0.03 |
| 2396 | G | 0.651 | 0    |
| 2397 | A | 1.139 | 0.01 |
| 2398 | A | 0.895 | 0.01 |
| 2399 | G | 0.366 | 0    |
| 2400 | C | 0.339 | 0    |
| 2401 | A | 0.298 | 0.02 |
| 2402 | G | 0.38  | 0.03 |
| 2403 | U | 0.203 | 0.9  |
| 2404 | G | 0.122 | 0.95 |
| 2405 | G | 0.109 | 0.92 |



|      |   |       |      |
|------|---|-------|------|
| 2406 | C | 0.081 | 0.29 |
| 2407 | C | 0     | 0.26 |
| 2408 | A | 0.502 | 0.07 |
| 2409 | U | 0.271 | 0.23 |
| 2410 | U | 0.448 | 0.93 |
| 2411 | A | 0.868 | 0.77 |
| 2412 | U | 0.054 | 0.21 |
| 2413 | C | 0.081 | 0.04 |
| 2414 | A | 0.963 | 0    |
| 2415 | A | 0.787 | 0.05 |
| 2416 | A | 1.139 | 0.06 |
| 2417 | A | 1.383 | 0.07 |
| 2418 | G | 1.194 | 0.09 |
| 2419 | A | 1.424 | 0.04 |
| 2420 | A | 1.004 | 0.01 |
| 2421 | A | 0.963 | 0.01 |
| 2422 | A | 1.465 | 0.01 |
| 2423 | G | 0.868 | 0.02 |
| 2424 | A | 0.977 | 0.2  |
| 2425 | U | 0.678 | 0.78 |
| 2426 | A | 0.773 | 0.78 |
| 2427 | G | 0.461 | 0.06 |
| 2428 | U | 0.42  | 0    |
| 2429 | U | 0.258 | 0.01 |
| 2430 | G | 0.543 | 0.01 |
| 2431 | C | 0.027 | 0.02 |
| 2432 | A | 0.597 | 0.02 |
| 2433 | U | 0.461 | 0.14 |
| 2434 | U | 0.637 | 0.18 |
| 2435 | A | 1.302 | 0.06 |
| 2436 | A | 1.126 | 0.05 |
| 2437 | G | 1.017 | 0.04 |
| 2438 | A | 0.963 | 0.02 |
| 2439 | G | 0.624 | 0.02 |
| 2440 | A | 0.841 | 0.01 |
| 2441 | A | 0.936 | 0    |
| 2442 | A | 0.475 | 0.03 |
| 2443 | U | 0.149 | 0.19 |
| 2444 | C | 0.041 | 0.24 |
| 2445 | U | 0     | 0.83 |
| 2446 | G | 0.434 | 0.81 |
| 2447 | U | 0.163 | 0.8  |
| 2448 | G | 0.827 | 0.04 |

|      |   |       |      |
|------|---|-------|------|
| 2449 | A | 0.855 | 0    |
| 2450 | A | 0.895 | 0    |
| 2451 | A | 1.072 | 0    |
| 2452 | A | 0.773 | 0.02 |
| 2453 | G | 0.502 | 0.02 |
| 2454 | A | 0.515 | 0.21 |
| 2455 | U | 0.231 | 0.22 |
| 2456 | G | 0.488 | 0.11 |
| 2457 | G | 1.112 | 0.09 |
| 2458 | A | 1.641 | 0.1  |
| 2459 | A | 0.99  | 0.61 |
| 2460 | A | 1.031 | 0.77 |
| 2461 | A | 1.465 | 0.76 |
| 2462 | G | 0.393 | 0.09 |
| 2463 | G | 0.271 | 0.07 |
| 2464 | A | 0.38  | 0.05 |
| 2465 | U | 0.095 | 0.01 |
| 2466 | G | 0.027 | 0.01 |
| 2467 | G | 0.054 | 0.01 |
| 2468 | U | 0.081 | 0    |
| 2469 | C | 0.068 | 0.02 |
| 2470 | A | 0.488 | 0.02 |
| 2471 | G | 0.326 | 0.01 |
| 2472 | U | 0.366 | 0.05 |
| 2473 | U | 0.244 | 0.06 |
| 2474 | G | 0.176 | 0.02 |
| 2475 | G | 0.244 | 0.02 |
| 2476 | A | 0.19  | 0.01 |
| 2477 | G | 0.081 | 0    |
| 2478 | G | 0.271 | 0    |
| 2479 | A | 0.475 | 0.01 |
| 2480 | A | 0.434 | 0.01 |
| 2481 | G | 0.543 | 0.01 |
| 2482 | C | 0.054 | 0    |
| 2483 | U | 0.027 | 0    |
| 2484 | C | 0.014 | 0    |
| 2485 | C | 0.041 | 0    |
| 2486 | C | 0.041 | 0.02 |
| 2487 | C | 0.081 | 0.02 |
| 2488 | C | 0.122 | 0.02 |
| 2489 | G | 0.081 | 0.03 |
| 2490 | A | 0.136 | 0.02 |
| 2491 | C | 0     | 0.02 |

|      |   |       |          |
|------|---|-------|----------|
| 2492 | C | 0     | 0.2      |
| 2493 | A | 0.407 | 0.2      |
| 2494 | A | 0.624 | 0.01     |
| 2495 | U | 0.122 | 0        |
| 2496 | C | 0     | 0        |
| 2497 | C | 0     | 0.01     |
| 2498 | A | 0.556 | 0.01     |
| 2499 | U | 0.231 | 0.19     |
| 2500 | A | 1.031 | 0.19     |
| 2501 | C | 0     | 0        |
| 2502 | A | 0.515 | 0        |
| 2503 | A | 0.475 | 0        |
| 2504 | C | 0.163 | 0        |
| 2505 | A | 0.109 | 0        |
| 2506 | C | 0.041 | 0        |
| 2507 | C | 0.027 | 8.26E-05 |
| 2508 | C | 0.014 | 0        |
| 2509 | C | 0.014 | 0        |
| 2510 | C | 0     | 0.01     |
| 2511 | A | 0.773 | 0.01     |
| 2512 | C | 0     | 0        |
| 2513 | A | 0.38  | 0.01     |
| 2514 | U | 0.217 | 0.14     |
| 2515 | U | 0.339 | 0.16     |
| 2516 | U | 0.149 | 0.04     |
| 2517 | G | 0.217 | 0.02     |
| 2518 | C | 0.081 | 0        |
| 2519 | U | 0     | 0        |
| 2520 | A | 0.353 | 0        |
| 2521 | U | 0.502 | 0        |
| 2522 | A | 1.126 | 0.02     |
| 2523 | A | 0.949 | 0.12     |
| 2524 | A | 0.949 | 0.11     |
| 2525 | G | 1.058 | 0.02     |
| 2526 | A | 1.18  | 0.03     |
| 2527 | A | 1.004 | 0.02     |
| 2528 | A | 0.936 | 0.02     |
| 2529 | A | 0.977 | 0.01     |
| 2530 | A | 0.936 | 0.01     |
| 2531 | G | 0.732 | 0        |
| 2532 | G | 0.868 | 0        |
| 2533 | A | 0.963 | 0        |
| 2534 | U | 0     | 0.01     |

|      |   |       |      |
|------|---|-------|------|
| 2535 | A | 1.356 | 0.01 |
| 2536 | A | 1.166 | 0    |
| 2537 | G | 1.424 | 0    |
| 2538 | A | 1.044 | 0.01 |
| 2539 | A | 0.502 | 0.01 |
| 2540 | C | 0     | 0.01 |
| 2541 | A | 0.732 | 0.02 |
| 2542 | A | 0.705 | 0.01 |
| 2543 | A | 0.597 | 0.07 |
| 2544 | U | 0.136 | 0.09 |
| 2545 | G | 0.237 | 0.03 |
| 2546 | G | 0.502 | 0.02 |
| 2547 | A | 0.651 | 0.03 |
| 2548 | G | 0.57  | 0.03 |
| 2549 | A | 0.78  | 0.01 |
| 2550 | A | 0.855 | 0.1  |
| 2551 | U | 0.454 | 0.32 |
| 2552 | G | 0.285 | 0.32 |
| 2553 | C | 0.122 | 0.44 |
| 2554 | U | 0.373 | 0.47 |
| 2555 | G | 0.604 | 0.18 |
| 2556 | A | 0.773 | 0.1  |
| 2557 | U | 0.617 | 0.52 |
| 2558 | A | 1.166 | 0.54 |
| 2559 | G | 0.766 | 0.48 |
| 2560 | A | 0.956 | 0.19 |
| 2561 | U | 0.543 | 0.66 |
| 2562 | U | 0.475 | 0.79 |
| 2563 | U | 0.509 | 0.43 |
| 2564 | U | 0.678 | 0.18 |
| 2565 | A | 0.705 | 0.21 |
| 2566 | G | 0.373 | 0.2  |
| 2567 | G | 0.359 | 0.09 |
| 2568 | G | 0.8   | 0.3  |
| 2569 | A | 0.678 | 0.62 |
| 2570 | A | 0.631 | 0.64 |
| 2571 | C | 0.183 | 0.94 |
| 2572 | U | 0.76  | 0.94 |
| 2573 | A | 0.787 | 0.71 |
| 2574 | A | 0.787 | 0.46 |
| 2575 | A | 0.97  | 0.43 |
| 2576 | U | 0.895 | 0.36 |
| 2577 | A | 0.807 | 0.49 |

|      |   |       |      |
|------|---|-------|------|
| 2578 | G | 0.427 | 0.43 |
| 2579 | G | 0.088 | 0.25 |
| 2580 | G | 0.054 | 0.07 |
| 2581 | U | 0.041 | 0.17 |
| 2582 | C | 0.068 | 0.15 |
| 2583 | A | 0.38  | 0.08 |
| 2584 | C | 0.109 | 0.07 |
| 2585 | U | 0.597 | 0.02 |
| 2586 | C | 0.373 | 0.02 |
| 2587 | A | 1.465 | 0.01 |
| 2588 | G | 0.142 | 0.01 |
| 2589 | G | 0.122 | 0.12 |
| 2590 | A | 0.149 | 0.19 |
| 2591 | C | 0.081 | 0.23 |
| 2592 | U | 0.068 | 0.27 |
| 2593 | U | 0.305 | 0.23 |
| 2594 | U | 2.109 | 0    |
| 2595 | A | 1.207 | 0.01 |
| 2596 | C | 0.339 | 0.02 |
| 2597 | G | 0.793 | 0.15 |
| 2598 | G | 1.289 | 0.14 |
| 2599 | A | 0.217 | 0.19 |
| 2600 | A | 0.115 | 0.59 |
| 2601 | G | 0.034 | 0.82 |
| 2602 | U | 0.02  | 0.87 |
| 2603 | C | 0     | 0.85 |
| 2604 | C | 0.529 | 0.67 |
| 2605 | A | 0.543 | 0.14 |
| 2606 | A | 0.665 | 0.76 |
| 2607 | U | 0.556 | 0.8  |
| 2608 | U | 0.671 | 0.82 |
| 2609 | A | 1.282 | 0.33 |
| 2610 | G | 0.617 | 0.82 |
| 2611 | G | 0.441 | 0.78 |
| 2612 | A | 0.522 | 0.1  |
| 2613 | A | 0.766 | 0.01 |
| 2614 | U | 0.488 | 0.1  |
| 2615 | A | 0.597 | 0.13 |
| 2616 | C | 0.075 | 0.17 |
| 2617 | C | 0.156 | 0.17 |
| 2618 | A | 0.434 | 0.02 |
| 2619 | C | 0.19  | 0.01 |
| 2620 | A | 0.366 | 0.09 |

|      |   |       |      |
|------|---|-------|------|
| 2621 | C | 0.068 | 0.44 |
| 2622 | C | 0.041 | 0.63 |
| 2623 | C | 0.034 | 0.46 |
| 2624 | U | 0.047 | 0.84 |
| 2625 | G | 0.264 | 0.85 |
| 2626 | C | 0.081 | 0.74 |
| 2627 | A | 0.617 | 0.14 |
| 2628 | G | 0.637 | 0.67 |
| 2629 | G | 0.61  | 0.73 |
| 2630 | A | 0.353 | 0.71 |
| 2631 | C | 0.068 | 0.78 |
| 2632 | U | 0.081 | 0.55 |
| 2633 | A | 0.339 | 0.06 |
| 2634 | G | 0.149 | 0.04 |
| 2635 | C | 0.142 | 0.01 |
| 2636 | A | 1.017 | 0.01 |
| 2637 | A | 0.373 | 0.02 |
| 2638 | A | 0.78  | 0.03 |
| 2639 | A | 0.827 | 0.04 |
| 2640 | A | 0.861 | 0.02 |
| 2641 | G | 0.719 | 0.01 |
| 2642 | G | 0.841 | 0.01 |
| 2643 | A | 1.017 | 0.02 |
| 2644 | A | 0.848 | 0.03 |
| 2645 | A | 0.936 | 0.39 |
| 2646 | A | 0.943 | 0.84 |
| 2647 | G | 0.848 | 0.78 |
| 2648 | A | 0.936 | 0.15 |
| 2649 | A | 0.793 | 0.53 |
| 2650 | U | 0.502 | 0.43 |
| 2651 | U | 0.529 | 0.09 |
| 2652 | A | 1.234 | 0.03 |
| 2653 | C | 0.109 | 0.03 |
| 2654 | A | 0.522 | 0.09 |
| 2655 | G | 0.271 | 0.26 |
| 2656 | U | 0.149 | 0.29 |
| 2657 | A | 0.163 | 0.18 |
| 2658 | C | 0.027 | 0.28 |
| 2659 | U | 0.041 | 0.37 |
| 2660 | G | 0.095 | 0.21 |
| 2661 | G | 0.231 | 0.13 |
| 2662 | A | 0.448 | 0.43 |
| 2663 | U | 0.176 | 0.53 |

|      |   |       |      |
|------|---|-------|------|
| 2664 | A | 0.99  | 0.16 |
| 2665 | U | 0.543 | 0.7  |
| 2666 | A | 0.895 | 0.76 |
| 2667 | G | 0.258 | 0.77 |
| 2668 | G | 0.149 | 0.61 |
| 2669 | U | 0.068 | 0.04 |
| 2670 | G | 0.339 | 0.05 |
| 2671 | A | 0.515 | 0.21 |
| 2672 | U | 0.19  | 0.23 |
| 2673 | G | 0.461 | 0.05 |
| 2674 | C | 0.068 | 0.6  |
| 2675 | A | 0.57  | 0.75 |
| 2676 | U | 0     | 0.83 |
| 2677 | A | 0.963 | 0.69 |
| 2678 | U | 0.407 | 0.46 |
| 2679 | U | 0.231 | 0.62 |
| 2680 | U | 0.163 | 0.5  |
| 2681 | C | 0.081 | 0.12 |
| 2682 | U | 0.122 | 0.17 |
| 2683 | C | 0.041 | 0.18 |
| 2684 | C | 0     | 0.28 |
| 2685 | A | 0.407 | 0.67 |
| 2686 | U | 0.203 | 0.65 |
| 2687 | A | 0.556 | 0.2  |
| 2688 | C | 0.054 | 0.03 |
| 2689 | C | 0.095 | 0.02 |
| 2690 | U | 0.081 | 0.01 |
| 2691 | C | 0.136 | 0.12 |
| 2692 | U | 0.068 | 0.13 |
| 2693 | A | 0.882 | 0.05 |
| 2694 | G | 0.19  | 0.19 |
| 2695 | A | 0.203 | 0.73 |
| 2696 | U | 0.176 | 0.75 |
| 2697 | G | 0.217 | 0.37 |
| 2698 | A | 0.475 | 0.18 |
| 2699 | A | 0.678 | 0.09 |
| 2700 | G | 0.393 | 0.14 |
| 2701 | A | 0.42  | 0.18 |
| 2702 | A | 0.434 | 0.18 |
| 2703 | U | 0.285 | 0.35 |
| 2704 | U | 0.285 | 0.34 |
| 2705 | U | 0.095 | 0.04 |
| 2706 | A | 0.095 | 0.06 |

|      |   |       |      |
|------|---|-------|------|
| 2707 | G | 0.014 | 0.06 |
| 2708 | G | 0.014 | 0.02 |
| 2709 | C | 0     | 0.02 |
| 2710 | A | 0.014 | 0.48 |
| 2711 | G | 0.041 | 0.61 |
| 2712 | U | 0.665 | 0.39 |
| 2713 | A | 0.827 | 0.09 |
| 2714 | C | 0.095 | 0.05 |
| 2715 | A | 0.624 | 0.04 |
| 2716 | C | 0.041 | 0.06 |
| 2717 | U | 0     | 0.1  |
| 2718 | G | 0.027 | 0.12 |
| 2719 | C | 0.054 | 0.1  |
| 2720 | C | 0.068 | 0.41 |
| 2721 | U | 0.095 | 0.48 |
| 2722 | U | 0.393 | 0.43 |
| 2723 | U | 0     | 0.17 |
| 2724 | A | 0.366 | 0.03 |
| 2725 | C | 0.163 | 0    |
| 2726 | U | 0.136 | 0.01 |
| 2727 | U | 0.38  | 0.97 |
| 2728 | U | 0.041 | 0.97 |
| 2729 | A | 0.773 | 0.04 |
| 2730 | C | 0.109 | 0.01 |
| 2731 | C | 0     | 0.02 |
| 2732 | A | 0.163 | 0.03 |
| 2733 | U | 0.109 | 0.03 |
| 2734 | C | 0     | 0.04 |
| 2735 | A | 0.665 | 0.95 |
| 2736 | G | 0.57  | 0.95 |
| 2737 | U | 0.122 | 0.02 |
| 2738 | A | 0.814 | 0.02 |
| 2739 | A | 0.556 | 0.01 |
| 2740 | A | 0.448 | 0.01 |
| 2741 | U | 0.393 | 0    |
| 2742 | A | 0.855 | 0.06 |
| 2743 | A | 0.773 | 0.64 |
| 2744 | U | 0.624 | 0.98 |
| 2745 | G | 0.027 | 0.51 |
| 2746 | C | 0     | 0.14 |
| 2747 | A | 0.095 | 0.12 |
| 2748 | G | 0.136 | 0.05 |
| 2749 | A | 0.136 | 0    |



|      |   |       |      |
|------|---|-------|------|
| 2750 | G | 0.014 | 0    |
| 2751 | C | 0.014 | 0    |
| 2752 | C | 0     | 0.27 |
| 2753 | A | 0.326 | 0.28 |
| 2754 | G | 0.57  | 0.02 |
| 2755 | G | 0.637 | 0.04 |
| 2756 | A | 0.773 | 0.04 |
| 2757 | A | 0.624 | 0.03 |
| 2758 | A | 0.556 | 0.01 |
| 2759 | A | 0.624 | 0.01 |
| 2760 | C | 0.312 | 0.01 |
| 2761 | G | 0.515 | 0.03 |
| 2762 | A | 0.719 | 0.5  |
| 2763 | U | 0.38  | 0.61 |
| 2764 | A | 0.841 | 0.12 |
| 2765 | C | 0.122 | 0.12 |
| 2766 | A | 0.61  | 0.12 |
| 2767 | U | 0.339 | 0.09 |
| 2768 | U | 0.461 | 0    |
| 2769 | U | 0.407 | 0    |
| 2770 | A | 1.275 | 0    |
| 2771 | U | 0.665 | 0    |
| 2772 | A | 0.949 | 0    |
| 2773 | A | 1.18  | 0    |
| 2774 | G | 0.095 | 0    |
| 2775 | G | 0.054 | 0    |
| 2776 | U | 0.041 | 0    |
| 2777 | U | 0.041 | 0.05 |
| 2778 | C | 0.014 | 0.09 |
| 2779 | U | 0.027 | 0.09 |
| 2780 | G | 0.041 | 0.01 |
| 2781 | C | 0.095 | 0.31 |
| 2782 | C | 0.366 | 0.31 |
| 2783 | U | 0.081 | 0.01 |
| 2784 | C | 0.258 | 0.01 |
| 2785 | A | 0.773 | 0    |
| 2786 | G | 0.475 | 0.4  |
| 2787 | G | 0.434 | 0.4  |
| 2788 | G | 0.298 | 0.36 |
| 2789 | A | 0.461 | 0.03 |
| 2790 | U | 0.19  | 0.41 |
| 2791 | G | 0.176 | 0.45 |
| 2792 | G | 0.163 | 0.55 |

|      |   |       |      |
|------|---|-------|------|
| 2793 | A | 0.366 | 0.51 |
| 2794 | A | 0.407 | 0.52 |
| 2795 | G | 0.258 | 0.44 |
| 2796 | G | 0.068 | 0.39 |
| 2797 | G | 0.041 | 0.39 |
| 2798 | G | 0.081 | 0.27 |
| 2799 | U | 0.122 | 0.29 |
| 2800 | C | 0.136 | 0.04 |
| 2801 | A | 0.488 | 0.01 |
| 2802 | C | 0.068 | 0.13 |
| 2803 | C | 0.095 | 0.14 |
| 2804 | A | 0.434 | 0.25 |
| 2805 | G | 0.203 | 0.25 |
| 2806 | C | 0.041 | 0.01 |
| 2807 | C | 0.014 | 0.05 |
| 2808 | A | 0.353 | 0.28 |
| 2809 | U | 0.203 | 0.39 |
| 2810 | C | 0.027 | 0.66 |
| 2811 | U | 0.041 | 0.85 |
| 2812 | U | 0.054 | 0.69 |
| 2813 | C | 0.014 | 0.61 |
| 2814 | C | 0     | 0.61 |
| 2815 | A | 0.38  | 0.36 |
| 2816 | A | 0.678 | 0.01 |
| 2817 | U | 0.448 | 0.1  |
| 2818 | A | 0.909 | 0.09 |
| 2819 | C | 0.054 | 0.01 |
| 2820 | A | 0.61  | 0.01 |
| 2821 | C | 0.163 | 0.01 |
| 2822 | U | 0.068 | 0.01 |
| 2823 | A | 0.705 | 0.02 |
| 2824 | U | 0.231 | 0.24 |
| 2825 | G | 0.543 | 0.25 |
| 2826 | A | 0.448 | 0.23 |
| 2827 | G | 0.475 | 0.21 |
| 2828 | A | 0.312 | 0.19 |
| 2829 | C | 0.041 | 0.01 |
| 2830 | A | 0.502 | 0.02 |
| 2831 | U | 0.298 | 0.02 |
| 2832 | G | 0.203 | 0.03 |
| 2833 | U | 0.136 | 0.68 |
| 2834 | G | 0.258 | 0.71 |
| 2835 | C | 0.027 | 0.77 |

|      |   |       |      |
|------|---|-------|------|
| 2836 | U | 0.095 | 0.65 |
| 2837 | A | 0.475 | 0.28 |
| 2838 | G | 0.597 | 0.35 |
| 2839 | A | 0.502 | 0.26 |
| 2840 | A | 0.258 | 0    |
| 2841 | C | 0.041 | 0    |
| 2842 | C | 0.014 | 0.01 |
| 2843 | C | 0.068 | 0.08 |
| 2844 | U | 0.203 | 0.27 |
| 2845 | U | 0.271 | 0.38 |
| 2846 | C | 0.068 | 0.21 |
| 2847 | A | 0.977 | 0.46 |
| 2848 | G | 0.814 | 0.53 |
| 2849 | G | 0.936 | 0.56 |
| 2850 | A | 0.936 | 0.52 |
| 2851 | A | 1.092 | 0.13 |
| 2852 | G | 0.59  | 0.05 |
| 2853 | G | 0.461 | 0.03 |
| 2854 | C | 0.57  | 0.01 |
| 2855 | A | 0.814 | 0.02 |
| 2856 | A | 0.882 | 0.05 |
| 2857 | A | 0.922 | 0.03 |
| 2858 | U | 0.298 | 0    |
| 2859 | C | 0.244 | 0    |
| 2860 | C | 0.292 | 0    |
| 2861 | A | 0.59  | 0.02 |
| 2862 | G | 0.604 | 0.8  |
| 2863 | A | 0.868 | 0.99 |
| 2864 | U | 0.414 | 0.92 |
| 2865 | G | 0.502 | 0.71 |
| 2866 | U | 0.346 | 0.41 |
| 2867 | G | 0.637 | 0.34 |
| 2868 | A | 0.8   | 0.27 |
| 2869 | C | 0.115 | 0.2  |
| 2870 | C | 0.17  | 0.16 |
| 2871 | U | 0.515 | 0.15 |
| 2872 | U | 1.038 | 0.3  |
| 2873 | A | 2.028 | 0.6  |
| 2874 | G | 0.38  | 0.94 |
| 2875 | U | 0.197 | 0.96 |
| 2876 | C | 0.197 | 0.89 |
| 2877 | C | 0.102 | 0.59 |
| 2878 | A | 0.244 | 0.59 |

|      |   |       |      |
|------|---|-------|------|
| 2879 | G | 0.42  | 0.6  |
| 2880 | U | 0.983 | 0.02 |
| 2881 | A | 1.051 | 0.01 |
| 2882 | U | 0.658 | 0.03 |
| 2883 | A | 1.716 | 0.19 |
| 2884 | U | 0.237 | 0.71 |
| 2885 | G | 0.359 | 0.77 |
| 2886 | G | 0.237 | 0.63 |
| 2887 | A | 0.488 | 0.64 |
| 2888 | U | 0.244 | 0.65 |
| 2889 | G | 0.902 | 0.61 |
| 2890 | A | 0.631 | 0.53 |
| 2891 | C | 0.19  | 0.48 |
| 2892 | A | 0.407 | 0.55 |
| 2893 | U | 0.136 | 0.6  |
| 2894 | C | 0.149 | 0.3  |
| 2895 | U | 0.387 | 0.56 |
| 2896 | U | 1.139 | 0.63 |
| 2897 | A | 1.255 | 0.32 |
| 2898 | A | 1.078 | 0.1  |
| 2899 | U | 0.827 | 0.14 |
| 2900 | A | 1.058 | 0.06 |
| 2901 | G | 0.312 | 0.04 |
| 2902 | C | 0.17  | 0.01 |
| 2903 | U | 0.407 | 0.29 |
| 2904 | A | 0.977 | 0.56 |
| 2905 | G | 0.461 | 0.49 |
| 2906 | U | 0.203 | 0.01 |
| 2907 | G | 0.644 | 0.03 |
| 2908 | A | 1.072 | 0.03 |
| 2909 | C | 0.217 | 0.04 |
| 2910 | A | 0.285 | 0.41 |
| 2911 | G | 0.231 | 0.46 |
| 2912 | G | 0.231 | 0.33 |
| 2913 | A | 0.997 | 0.06 |
| 2914 | C | 0.359 | 0.02 |
| 2915 | A | 0.875 | 0.01 |
| 2916 | G | 1.031 | 0.01 |
| 2917 | A | 0.855 | 0.03 |
| 2918 | C | 0.081 | 0.34 |
| 2919 | C | 0.068 | 0.54 |
| 2920 | U | 0     | 0.47 |
| 2921 | G | 0.176 | 0.09 |

|      |   |       |      |
|------|---|-------|------|
| 2922 | G | 0.461 | 0.03 |
| 2923 | A | 0.78  | 0.01 |
| 2924 | A | 0.814 | 0.02 |
| 2925 | C | 0.258 | 0.05 |
| 2926 | A | 1.316 | 0.06 |
| 2927 | U | 0.488 | 0.08 |
| 2928 | G | 0.895 | 0.05 |
| 2929 | A | 1.119 | 0.01 |
| 2930 | C | 0.387 | 0.01 |
| 2931 | A | 0.597 | 0.01 |
| 2932 | G | 0.326 | 0.02 |
| 2933 | G | 0.251 | 0.03 |
| 2934 | G | 0.19  | 0.05 |
| 2935 | U | 0.312 | 0.75 |
| 2936 | A | 1.383 | 0.93 |
| 2937 | G | 0.298 | 0.91 |
| 2938 | U | 0.353 | 0.68 |
| 2939 | U | 0.373 | 0.03 |
| 2940 | U | 0.556 | 0.03 |
| 2941 | U | 0.699 | 0.03 |
| 2942 | A | 0.895 | 0.01 |
| 2943 | C | 0.312 | 0.01 |
| 2944 | A | 0.855 | 0.03 |
| 2945 | G | 0.42  | 0.67 |
| 2946 | U | 0.326 | 0.89 |
| 2947 | C | 0.448 | 0.91 |
| 2948 | A | 1.072 | 0.73 |
| 2949 | A | 1.058 | 0.02 |
| 2950 | A | 1.18  | 0.01 |
| 2951 | G | 0.488 | 0.05 |
| 2952 | G | 0.461 | 0.06 |
| 2953 | A | 0.583 | 0.07 |
| 2954 | A | 0.298 | 0.07 |
| 2955 | C | 0.068 | 0.03 |
| 2956 | U | 0.122 | 0.23 |
| 2957 | C | 0.054 | 0.39 |
| 2958 | U | 0.271 | 0.59 |
| 2959 | U | 0.556 | 0.67 |
| 2960 | G | 1.858 | 0.58 |
| 2961 | A | 1.478 | 0.04 |
| 2962 | A | 1.465 | 0.01 |
| 2963 | U | 0.583 | 0.01 |
| 2964 | A | 1.275 | 0.04 |

|      |   |       |      |
|------|---|-------|------|
| 2965 | G | 0.895 | 0.05 |
| 2966 | C | 0     | 0.02 |
| 2967 | A | 1.18  | 0.03 |
| 2968 | U | 0.665 | 0.58 |
| 2969 | A | 1.004 | 0.76 |
| 2970 | G | 0.244 | 0.79 |
| 2971 | G | 0.244 | 0.5  |
| 2972 | G | 0.041 | 0.3  |
| 2973 | U | 0.041 | 0.22 |
| 2974 | U | 0.502 | 0.24 |
| 2975 | U | 0.76  | 0.31 |
| 2976 | U | 0.515 | 0.27 |
| 2977 | C | 0.176 | 0.07 |
| 2978 | U | 0.149 | 0.02 |
| 2979 | A | 0.285 | 0.01 |
| 2980 | C | 0.122 | 0.01 |
| 2981 | C | 0.081 | 0.01 |
| 2982 | C | 0.136 | 0.03 |
| 2983 | C | 0.149 | 0.03 |
| 2984 | A | 0.773 | 0.07 |
| 2985 | G | 0.841 | 0.09 |
| 2986 | A | 0.963 | 0.07 |
| 2987 | A | 0.963 | 0.02 |
| 2988 | G | 0.827 | 0.11 |
| 2989 | A | 0.936 | 0.11 |
| 2990 | G | 0.773 | 0.13 |
| 2991 | A | 1.072 | 0.04 |
| 2992 | A | 1.221 | 0.17 |
| 2993 | A | 0.719 | 0.21 |
| 2994 | U | 0.298 | 0.25 |
| 2995 | U | 0.38  | 0.29 |
| 2996 | C | 0     | 0.26 |
| 2997 | C | 0     | 0.21 |
| 2998 | A | 1.031 | 0.13 |
| 2999 | A | 1.139 | 0.02 |
| 3000 | A | 1.166 | 0.04 |
| 3001 | A | 1.112 | 0.05 |
| 3002 | A | 1.234 | 0.05 |
| 3003 | G | 1.058 | 0.03 |
| 3004 | A | 1.18  | 0.01 |
| 3005 | U | 0.081 | 0.31 |
| 3006 | C | 0.122 | 0.34 |
| 3007 | C | 0.014 | 0.29 |

|      |   |       |      |
|------|---|-------|------|
| 3008 | C | 0.027 | 0.15 |
| 3009 | C | 0.014 | 0.39 |
| 3010 | C | 0.054 | 0.4  |
| 3011 | A | 0.231 | 0.37 |
| 3012 | U | 0.19  | 0.12 |
| 3013 | U | 0.583 | 0.01 |
| 3014 | U | 1.356 | 0.02 |
| 3015 | C | 1.261 | 0.07 |
| 3016 | A | 1.316 | 0.1  |
| 3017 | A | 1.044 | 0.23 |
| 3018 | U | 0.692 | 0.89 |
| 3019 | G | 0.61  | 0.87 |
| 3020 | G | 0.393 | 0.81 |
| 3021 | A | 0.271 | 0.54 |
| 3022 | U | 0.136 | 0.45 |
| 3023 | G | 0.109 | 0.5  |
| 3024 | G | 0.041 | 0.47 |
| 3025 | G | 0.054 | 0.31 |
| 3026 | G | 0.054 | 0.04 |
| 3027 | U | 0.271 | 0.22 |
| 3028 | A | 0.977 | 0.43 |
| 3029 | C | 0.298 | 0.44 |
| 3030 | G | 0.814 | 0.18 |
| 3031 | A | 0.827 | 0.14 |
| 3032 | A | 0.936 | 0.17 |
| 3033 | U | 0.61  | 0.4  |
| 3034 | U | 0.42  | 0.46 |
| 3035 | G | 0.285 | 0.35 |
| 3036 | U | 0.081 | 0.45 |
| 3037 | G | 0.122 | 0.25 |
| 3038 | G | 0.136 | 0.18 |
| 3039 | C | 0.217 | 0.75 |
| 3040 | C | 0.163 | 0.8  |
| 3041 | A | 0.353 | 0.75 |
| 3042 | A | 0.109 | 0.06 |
| 3043 | C | 0     | 0.02 |
| 3044 | A | 0.895 | 0.01 |
| 3045 | A | 0.827 | 0.03 |
| 3046 | A | 0.678 | 0.08 |
| 3047 | A | 0.773 | 0.1  |
| 3048 | U | 0.231 | 0.52 |
| 3049 | G | 0.488 | 0.51 |
| 3050 | G | 0.529 | 0.44 |

|      |   |       |      |
|------|---|-------|------|
| 3051 | A | 0.76  | 0.07 |
| 3052 | A | 0.719 | 0.27 |
| 3053 | G | 0.583 | 0.52 |
| 3054 | U | 0.353 | 0.65 |
| 3055 | U | 0.326 | 0.67 |
| 3056 | G | 0.122 | 0.21 |
| 3057 | C | 0     | 0.08 |
| 3058 | A | 0.909 | 0.08 |
| 3059 | A | 0.583 | 0.02 |
| 3060 | A | 1.058 | 0.07 |
| 3061 | A | 1.085 | 0.08 |
| 3062 | G | 1.099 | 0.26 |
| 3063 | A | 1.207 | 0.39 |
| 3064 | U | 0.868 | 0.45 |
| 3065 | A | 0.719 | 0.29 |
| 3066 | G | 0.258 | 0.29 |
| 3067 | A | 0.244 | 0.28 |
| 3068 | G | 0.014 | 0.06 |
| 3069 | U | 0.027 | 0.25 |
| 3070 | U | 0.014 | 0.26 |
| 3071 | G | 0.054 | 0.06 |
| 3072 | C | 0.027 | 0.1  |
| 3073 | C | 0.068 | 0.1  |
| 3074 | A | 0.366 | 0.02 |
| 3075 | C | 0.054 | 0.01 |
| 3076 | A | 0.597 | 0.01 |
| 3077 | A | 0.475 | 0.02 |
| 3078 | A | 0.841 | 0.09 |
| 3079 | G | 1.031 | 0.1  |
| 3080 | A | 0.827 | 0.12 |
| 3081 | G | 0.868 | 0.12 |
| 3082 | A | 0.977 | 0.02 |
| 3083 | G | 0.868 | 0.03 |
| 3084 | A | 0.515 | 0.05 |
| 3085 | C | 0     | 0.09 |
| 3086 | C | 0.014 | 0.48 |
| 3087 | U | 0.095 | 0.98 |
| 3088 | G | 0.366 | 0.87 |
| 3089 | G | 0.244 | 0.58 |
| 3090 | A | 0.339 | 0.51 |
| 3091 | C | 0.027 | 0.64 |
| 3092 | A | 0.515 | 0.66 |
| 3093 | G | 0.597 | 0.14 |



|      |   |       |      |
|------|---|-------|------|
| 3094 | U | 0.326 | 0.15 |
| 3095 | G | 0.678 | 0.06 |
| 3096 | A | 0.665 | 0.04 |
| 3097 | A | 0.787 | 0.14 |
| 3098 | U | 0.366 | 0.74 |
| 3099 | G | 0.637 | 0.67 |
| 3100 | A | 0.949 | 0.09 |
| 3101 | U | 0.312 | 0.37 |
| 3102 | A | 1.153 | 0.37 |
| 3103 | U | 0.366 | 0.8  |
| 3104 | A | 0.773 | 0.57 |
| 3105 | C | 0.122 | 0.6  |
| 3106 | A | 0.787 | 0.58 |
| 3107 | G | 0.76  | 0.01 |
| 3108 | A | 0.99  | 0.01 |
| 3109 | A | 0.8   | 0.01 |
| 3110 | G | 0.597 | 0    |
| 3111 | U | 0.556 | 0.2  |
| 3112 | U | 0.339 | 0.91 |
| 3113 | A | 1.017 | 0.94 |
| 3114 | G | 0.936 | 0.94 |
| 3115 | U | 0.231 | 0.91 |
| 3116 | A | 0.949 | 0.9  |
| 3117 | G | 0.461 | 0.07 |
| 3118 | G | 0.624 | 0.02 |
| 3119 | A | 0.705 | 0.01 |
| 3120 | G | 0.61  | 0.02 |
| 3121 | U | 0.264 | 0.85 |
| 3122 | A | 0.99  | 0.86 |
| 3123 | U | 0.509 | 0.99 |
| 3124 | U | 0.875 | 0.99 |
| 3125 | A | 1.519 | 0.93 |
| 3126 | A | 1.35  | 0.23 |
| 3127 | A | 0.848 | 0.06 |
| 3128 | U | 0.658 | 0.27 |
| 3129 | U | 0.482 | 0.96 |
| 3130 | G | 0.475 | 0.96 |
| 3131 | G | 0.251 | 0.94 |
| 3132 | G | 0.251 | 0.71 |
| 3133 | C | 0.149 | 0.02 |
| 3134 | A | 0.434 | 0.21 |
| 3135 | G | 0.224 | 0.2  |
| 3136 | C | 0.142 | 0.01 |

|      |   |       |      |
|------|---|-------|------|
| 3137 | U | 0.183 | 0    |
| 3138 | C | 0.224 | 0.01 |
| 3139 | A | 1.051 | 0.01 |
| 3140 | A | 0.99  | 0    |
| 3141 | A | 0.855 | 0.02 |
| 3142 | U | 0.515 | 0.04 |
| 3143 | U | 0.658 | 0.22 |
| 3144 | U | 0.502 | 0.22 |
| 3145 | A | 0.631 | 0.02 |
| 3146 | U | 0.115 | 0.71 |
| 3147 | C | 0.115 | 0.94 |
| 3148 | C | 0.054 | 0.94 |
| 3149 | A | 0.414 | 0.96 |
| 3150 | G | 0.075 | 0.29 |
| 3151 | G | 0.061 | 0.06 |
| 3152 | U | 0.027 | 0.05 |
| 3153 | A | 0.617 | 0.08 |
| 3154 | U | 0.475 | 0.09 |
| 3155 | A | 1.519 | 0.08 |
| 3156 | A | 0.827 | 0.07 |
| 3157 | A | 0.99  | 0.07 |
| 3158 | A | 1.031 | 0.07 |
| 3159 | A | 0.61  | 0.07 |
| 3160 | C | 0.027 | 0.08 |
| 3161 | C | 0.122 | 0.29 |
| 3162 | A | 0.793 | 0.57 |
| 3163 | A | 0.8   | 0.54 |
| 3164 | A | 0.732 | 0.53 |
| 3165 | C | 0.231 | 0.61 |
| 3166 | A | 0.787 | 0.6  |
| 3167 | U | 0.441 | 0.31 |
| 3168 | C | 0.047 | 0.36 |
| 3169 | U | 0.136 | 0.4  |
| 3170 | C | 0.061 | 0.37 |
| 3171 | U | 0.027 | 0.7  |
| 3172 | G | 0.224 | 0.71 |
| 3173 | U | 0.142 | 0.59 |
| 3174 | A | 0.61  | 0.56 |
| 3175 | G | 0.326 | 0.56 |
| 3176 | G | 0.305 | 0.55 |
| 3177 | U | 0.244 | 0.97 |
| 3178 | U | 0.237 | 0.98 |
| 3179 | A | 1.187 | 0.94 |

|      |   |       |      |
|------|---|-------|------|
| 3180 | A | 0.882 | 0.02 |
| 3181 | U | 0.624 | 0.03 |
| 3182 | U | 0.909 | 0.02 |
| 3183 | A | 0.956 | 0.9  |
| 3184 | G | 1.004 | 0.9  |
| 3185 | A | 0.977 | 0.02 |
| 3186 | G | 0.936 | 0.03 |
| 3187 | G | 0.977 | 0.02 |
| 3188 | A | 1.261 | 0.01 |
| 3189 | A | 1.207 | 0.01 |
| 3190 | A | 1.316 | 0.01 |
| 3191 | A | 1.105 | 0.03 |
| 3192 | A | 1.37  | 0.04 |
| 3193 | U | 0.4   | 0.04 |
| 3194 | G | 0.604 | 0.02 |
| 3195 | A | 0.454 | 0.01 |
| 3196 | C | 0.014 | 0    |
| 3197 | U | 0.027 | 0.01 |
| 3198 | C | 0.02  | 0.03 |
| 3199 | U | 0.509 | 0.03 |
| 3200 | A | 1.051 | 0    |
| 3201 | A | 0.549 | 0    |
| 3202 | C | 0     | 0.01 |
| 3203 | A | 0.346 | 0.01 |
| 3204 | G | 0.631 | 0    |
| 3205 | A | 1.092 | 0    |
| 3206 | G | 0.888 | 0.02 |
| 3207 | G | 0.719 | 0.02 |
| 3208 | A | 0.929 | 0    |
| 3209 | A | 1.146 | 0.02 |
| 3210 | G | 0.712 | 0.07 |
| 3211 | U | 0.088 | 0.07 |
| 3212 | U | 0.034 | 0.01 |
| 3213 | C | 0.129 | 0.02 |
| 3214 | A | 1.248 | 0.31 |
| 3215 | G | 8.477 | 0.4  |
| 3216 | U | 0.515 | 0.57 |
| 3217 | G | 0.746 | 0.21 |
| 3218 | G | 0.095 | 0.01 |
| 3219 | A | 0.136 | 0.01 |
| 3220 | C | 0.081 | 0.02 |
| 3221 | U | 0.068 | 0.03 |
| 3222 | G | 0.109 | 0.02 |

|      |   |       |      |
|------|---|-------|------|
| 3223 | A | 0.068 | 0.02 |
| 3224 | G | 0     | 0.43 |
| 3225 | A | 0.095 | 0.55 |
| 3226 | U | 0.298 | 0.44 |
| 3227 | G | 0.678 | 0.04 |
| 3228 | G | 0.488 | 0.13 |
| 3229 | C | 0     | 0.32 |
| 3230 | A | 0.949 | 0.2  |
| 3231 | G | 1.072 | 0.01 |
| 3232 | A | 1.004 | 0.05 |
| 3233 | A | 1.017 | 0.06 |
| 3234 | G | 0.651 | 0.13 |
| 3235 | C | 0.081 | 0.13 |
| 3236 | A | 1.139 | 0.03 |
| 3237 | G | 0.895 | 0.01 |
| 3238 | A | 1.017 | 0.01 |
| 3239 | A | 1.112 | 0.03 |
| 3240 | U | 0     | 0.03 |
| 3241 | A | 1.492 | 0.03 |
| 3242 | U | 0.515 | 0.01 |
| 3243 | G | 1.478 | 0    |
| 3244 | A | 0.882 | 0    |
| 3245 | G | 1.329 | 0    |
| 3246 | G | 0.936 | 0    |
| 3247 | A | 1.139 | 0    |
| 3248 | A | 0.977 | 0    |
| 3249 | A | 0.99  | 0    |
| 3250 | A | 0.977 | 0    |
| 3251 | U | 0.448 | 0    |
| 3252 | A | 1.478 | 0.08 |
| 3253 | A | 1.085 | 0.11 |
| 3254 | A | 1.139 | 0.07 |
| 3255 | A | 1.18  | 0.41 |
| 3256 | U | 0.353 | 0.67 |
| 3257 | A | 1.424 | 0.66 |
| 3258 | A | 1.139 | 0.01 |
| 3259 | U | 0.461 | 0.05 |
| 3260 | U | 0.095 | 0.06 |
| 3261 | C | 0.041 | 0.21 |
| 3262 | U | 0.027 | 0.21 |
| 3263 | C | 0.054 | 0.01 |
| 3264 | A | 0.149 | 0.64 |
| 3265 | G | 0.068 | 0.66 |

|      |   |       |      |
|------|---|-------|------|
| 3266 | U | 0.095 | 0.39 |
| 3267 | C | 0.081 | 0.02 |
| 3268 | A | 0.515 | 0.03 |
| 3269 | G | 0.475 | 0.04 |
| 3270 | G | 0.19  | 0.04 |
| 3271 | A | 0.217 | 0.03 |
| 3272 | A | 0.19  | 0.01 |
| 3273 | C | 0.014 | 0.01 |
| 3274 | A | 0.8   | 0.03 |
| 3275 | A | 1.031 | 0.04 |
| 3276 | G | 1.004 | 0.04 |
| 3277 | A | 1.058 | 0.03 |
| 3278 | A | 1.044 | 0.02 |
| 3279 | G | 0.705 | 0.02 |
| 3280 | G | 0.665 | 0.01 |
| 3281 | A | 0.922 | 0.01 |
| 3282 | U | 0.326 | 0    |
| 3283 | G | 0.488 | 0.01 |
| 3284 | U | 0.176 | 0.09 |
| 3285 | U | 0.136 | 0.19 |
| 3286 | A | 0.109 | 0.12 |
| 3287 | U | 0.041 | 0.09 |
| 3288 | U | 0.054 | 0.02 |
| 3289 | A | 0.095 | 0    |
| 3290 | C | 0.027 | 0    |
| 3291 | C | 0.068 | 0.03 |
| 3292 | A | 0.624 | 0.04 |
| 3293 | A | 0.841 | 0.12 |
| 3294 | G | 1.099 | 0.12 |
| 3295 | A | 1.424 | 0.08 |
| 3296 | A | 1.709 | 0.04 |
| 3297 | G | 0     | 0.04 |
| 3298 | G | 0.068 | 0.01 |
| 3299 | C | 0.027 | 0    |
| 3300 | A | 0.529 | 0    |
| 3301 | A | 0.855 | 0    |
| 3302 | G | 0.678 | 0    |
| 3303 | C | 0.203 | 0    |
| 3304 | C | 0.068 | 0.04 |
| 3305 | A | 0.583 | 0.97 |
| 3306 | U | 0.407 | 0.98 |
| 3307 | U | 0.258 | 0.83 |
| 3308 | A | 0.99  | 0.02 |

|      |   |       |      |
|------|---|-------|------|
| 3309 | G | 0.787 | 0.01 |
| 3310 | A | 0.855 | 0.01 |
| 3311 | A | 0.909 | 0    |
| 3312 | G | 0.054 | 0    |
| 3313 | C | 0.041 | 0    |
| 3314 | C | 0.027 | 0    |
| 3315 | A | 0.258 | 0    |
| 3316 | C | 0.163 | 0.01 |
| 3317 | G | 0.122 | 0.82 |
| 3318 | G | 0.109 | 0.99 |
| 3319 | U | 0.041 | 0.97 |
| 3320 | A | 0.203 | 0.05 |
| 3321 | A | 0.19  | 0.01 |
| 3322 | U | 0.231 | 0.01 |
| 3323 | A | 0.651 | 0.01 |
| 3324 | A | 0.827 | 0.01 |
| 3325 | A | 0.665 | 0.01 |
| 3326 | G | 0.529 | 0.01 |
| 3327 | A | 0.38  | 0.02 |
| 3328 | G | 0.136 | 0.16 |
| 3329 | U | 0.095 | 0.28 |
| 3330 | C | 0     | 0.28 |
| 3331 | A | 0.407 | 0.39 |
| 3332 | G | 0.502 | 0.52 |
| 3333 | G | 0.556 | 0.24 |
| 3334 | A | 0.149 | 0.01 |
| 3335 | C | 0     | 0.02 |
| 3336 | A | 0.502 | 0.03 |
| 3337 | A | 0.461 | 0.2  |
| 3338 | U | 0.163 | 0.61 |
| 3339 | C | 0     | 0.42 |
| 3340 | A | 0.285 | 0    |
| 3341 | G | 0.61  | 0.03 |
| 3342 | U | 0.163 | 0.29 |
| 3343 | G | 0.312 | 0.28 |
| 3344 | G | 0.027 | 0.62 |
| 3345 | U | 0.027 | 0.51 |
| 3346 | C | 0     | 0.09 |
| 3347 | U | 0.149 | 0.32 |
| 3348 | U | 0.312 | 0.42 |
| 3349 | A | 1.153 | 0.17 |
| 3350 | U | 0.475 | 0.02 |
| 3351 | A | 0.99  | 0.02 |

|      |   |       |      |
|------|---|-------|------|
| 3352 | A | 0.651 | 0    |
| 3353 | A | 0.678 | 0    |
| 3354 | A | 0.624 | 0    |
| 3355 | U | 0.407 | 0.93 |
| 3356 | U | 0.339 | 0.94 |
| 3357 | C | 0.041 | 0.7  |
| 3358 | A | 0.448 | 0    |
| 3359 | C | 0.068 | 0    |
| 3360 | C | 0     | 0    |
| 3361 | A | 0.583 | 0.01 |
| 3362 | A | 0.665 | 0.04 |
| 3363 | G | 0.732 | 0.73 |
| 3364 | A | 0.298 | 0.79 |
| 3365 | A | 0.271 | 0.73 |
| 3366 | G | 0.203 | 0.15 |
| 3367 | A | 0.149 | 0.14 |
| 3368 | C | 0.068 | 0    |
| 3369 | A | 0.732 | 0.01 |
| 3370 | A | 0.61  | 0.01 |
| 3371 | A | 0.827 | 0.01 |
| 3372 | A | 0.895 | 0.05 |
| 3373 | U | 1.044 | 0.16 |
| 3374 | A | 0.434 | 0.53 |
| 3375 | C | 0.081 | 0.84 |
| 3376 | U | 0.136 | 1    |
| 3377 | G | 0.271 | 0.98 |
| 3378 | A | 0.366 | 0    |
| 3379 | A | 0.515 | 0    |
| 3380 | A | 0.515 | 0    |
| 3381 | G | 0.285 | 0    |
| 3382 | U | 0     | 0.97 |
| 3383 | A | 0.807 | 0.99 |
| 3384 | G | 0.76  | 0.84 |
| 3385 | G | 0.298 | 0.53 |
| 3386 | A | 0.678 | 0.17 |
| 3387 | A | 0.685 | 0.06 |
| 3388 | A | 0.454 | 0.07 |
| 3389 | A | 0.475 | 0.17 |
| 3390 | U | 0.244 | 0.45 |
| 3391 | U | 0.448 | 0.41 |
| 3392 | U | 0.271 | 0.5  |
| 3393 | G | 0.224 | 0.26 |
| 3394 | C | 0.176 | 0.02 |

|      |   |       |      |
|------|---|-------|------|
| 3395 | A | 0.834 | 0.01 |
| 3396 | A | 0.502 | 0.02 |
| 3397 | A | 0.536 | 0.07 |
| 3398 | G | 0.59  | 0.08 |
| 3399 | A | 0.359 | 0.57 |
| 3400 | U | 0.583 | 0.61 |
| 3401 | A | 0.936 | 0.12 |
| 3402 | A | 0.875 | 0.12 |
| 3403 | A | 1.092 | 0.12 |
| 3404 | G | 0.8   | 0.13 |
| 3405 | A | 0.895 | 0.05 |
| 3406 | A | 0.855 | 0.43 |
| 3407 | U | 0.4   | 0.49 |
| 3408 | A | 0.787 | 0.12 |
| 3409 | C | 0.041 | 0.02 |
| 3410 | A | 0.509 | 0.02 |
| 3411 | C | 0.142 | 0.15 |
| 3412 | A | 0.726 | 0.16 |
| 3413 | U | 0.366 | 0.12 |
| 3414 | A | 0.482 | 0.1  |
| 3415 | C | 0.054 | 0.01 |
| 3416 | C | 0.068 | 0.02 |
| 3417 | A | 0.353 | 0.01 |
| 3418 | A | 0.61  | 0    |
| 3419 | U | 0.441 | 0    |
| 3420 | G | 0.576 | 0.01 |
| 3421 | G | 0.624 | 0.01 |
| 3422 | A | 0.549 | 0.03 |
| 3423 | G | 0.346 | 0.03 |
| 3424 | U | 0.136 | 0.02 |
| 3425 | G | 0.543 | 0    |
| 3426 | A | 0.427 | 0.01 |
| 3427 | G | 0.59  | 0.34 |
| 3428 | A | 0.495 | 0.74 |
| 3429 | C | 0.088 | 0.85 |
| 3430 | U | 0.156 | 0.91 |
| 3431 | A | 0.665 | 0.94 |
| 3432 | U | 0.319 | 0.86 |
| 3433 | U | 0.298 | 0.29 |
| 3434 | A | 0.543 | 0.05 |
| 3435 | G | 0.353 | 0.01 |
| 3436 | C | 0.047 | 0.01 |
| 3437 | A | 0.387 | 0.01 |



|      |   |       |      |
|------|---|-------|------|
| 3438 | C | 0.088 | 0.01 |
| 3439 | A | 0.766 | 0    |
| 3440 | U | 0.244 | 0.22 |
| 3441 | G | 0.549 | 0.81 |
| 3442 | U | 0.332 | 0.95 |
| 3443 | A | 1.126 | 0.95 |
| 3444 | A | 1.051 | 0.87 |
| 3445 | U | 0.576 | 0.78 |
| 3446 | A | 1.017 | 0.34 |
| 3447 | C | 0.17  | 0.01 |
| 3448 | A | 1.282 | 0    |
| 3449 | G | 0.793 | 0    |
| 3450 | A | 1.329 | 0.01 |
| 3451 | A | 1.261 | 0.03 |
| 3452 | A | 1.01  | 0.03 |
| 3453 | A | 0.712 | 0.05 |
| 3454 | U | 0.461 | 0.43 |
| 3455 | A | 1.411 | 0.82 |
| 3456 | G | 0.956 | 0.84 |
| 3457 | G | 0.882 | 0.64 |
| 3458 | A | 1.187 | 0.07 |
| 3459 | A | 1.322 | 0.05 |
| 3460 | A | 1.275 | 0.05 |
| 3461 | G | 0.834 | 0.08 |
| 3462 | G | 1.024 | 0.11 |
| 3463 | A | 1.119 | 0.05 |
| 3464 | A | 1.166 | 0.04 |
| 3465 | G | 0.529 | 0.04 |
| 3466 | C | 0.339 | 0.05 |
| 3467 | A | 0.76  | 0.59 |
| 3468 | A | 0.963 | 0.82 |
| 3469 | U | 0.922 | 0.83 |
| 3470 | A | 1.051 | 0.43 |
| 3471 | G | 0.637 | 0.09 |
| 3472 | U | 0.529 | 0.13 |
| 3473 | G | 0.651 | 0.15 |
| 3474 | A | 0.916 | 0.65 |
| 3475 | U | 0.278 | 0.84 |
| 3476 | C | 0.407 | 0.98 |
| 3477 | U | 0.556 | 0.94 |
| 3478 | G | 0.393 | 0.95 |
| 3479 | G | 0.231 | 0.96 |
| 3480 | G | 0.068 | 0.76 |

|      |   |       |      |
|------|---|-------|------|
| 3481 | G | 0.38  | 0.27 |
| 3482 | A | 0.678 | 0.09 |
| 3483 | C | 0.068 | 0    |
| 3484 | A | 1.085 | 0    |
| 3485 | G | 0.705 | 0.01 |
| 3486 | G | 0.407 | 0.01 |
| 3487 | U | 0.203 | 0.08 |
| 3488 | C | 0.461 | 0.09 |
| 3489 | C | 0.054 | 0.88 |
| 3490 | C | 1.451 | 0.94 |
| 3491 | A | 0.963 | 0.83 |
| 3492 | A | 1.085 | 0.89 |
| 3493 | A | 1.356 | 0.93 |
| 3494 | A | 1.139 | 0.83 |
| 3495 | U | 0.488 | 0.76 |
| 3496 | U | 0.122 | 0.17 |
| 3497 | C | 0.122 | 0.08 |
| 3498 | C | 0.109 | 0.05 |
| 3499 | A | 0.244 | 0.02 |
| 3500 | C | 0.068 | 0.11 |
| 3501 | U | 0.529 | 0.19 |
| 3502 | U | 0.787 | 0.21 |
| 3503 | A | 0.692 | 0.13 |
| 3504 | C | 0.19  | 0.06 |
| 3505 | C | 0.407 | 0.07 |
| 3506 | A | 1.207 | 0.06 |
| 3507 | G | 0.57  | 0.04 |
| 3508 | U | 0.936 | 0.09 |
| 3509 | U | 0.814 | 0.09 |
| 3510 | G | 1.044 | 0.07 |
| 3511 | A | 1.031 | 0.01 |
| 3512 | G | 0.949 | 0.01 |
| 3513 | A | 1.79  | 0.02 |
| 3514 | A | 1.994 | 0.02 |
| 3515 | G | 0.475 | 0.02 |
| 3516 | G | 0.366 | 0.01 |
| 3517 | A | 0.637 | 0    |
| 3518 | U | 0.312 | 0    |
| 3519 | G | 0.665 | 0.02 |
| 3520 | U | 0.393 | 0.03 |
| 3521 | A | 1.099 | 0.41 |
| 3522 | U | 0.312 | 0.83 |
| 3523 | G | 0.353 | 0.82 |

|      |   |       |      |
|------|---|-------|------|
| 3524 | G | 0.326 | 0.71 |
| 3525 | G | 0.556 | 0.67 |
| 3526 | A | 0.855 | 0.63 |
| 3527 | A | 1.017 | 0.4  |
| 3528 | C | 0.719 | 0.82 |
| 3529 | A | 0.909 | 0.76 |
| 3530 | G | 1.383 | 0.71 |
| 3531 | U | 0.326 | 0.81 |
| 3532 | G | 0.203 | 0.83 |
| 3533 | G | 0.339 | 0.92 |
| 3534 | U | 0.326 | 0.88 |
| 3535 | G | 0.258 | 0.06 |
| 3536 | G | 0.448 | 0.05 |
| 3537 | A | 0.922 | 0.01 |
| 3538 | C | 0.434 | 0    |
| 3539 | A | 1.356 | 0    |
| 3540 | G | 1.126 | 0.01 |
| 3541 | A | 1.383 | 0.78 |
| 3542 | C | 0.326 | 0.89 |
| 3543 | U | 1.126 | 0.93 |
| 3544 | A | 1.261 | 0.91 |
| 3545 | U | 0.583 | 0.77 |
| 3546 | U | 0.732 | 0.74 |
| 3547 | G | 0.936 | 0.46 |
| 3548 | G | 1.139 | 0.02 |
| 3549 | C | 0.515 | 0.43 |
| 3550 | A | 1.709 | 0.43 |
| 3551 | G | 0.231 | 0.14 |
| 3552 | G | 0.244 | 0.12 |
| 3553 | U | 0.298 | 0.11 |
| 3554 | A | 0.624 | 0.08 |
| 3555 | A | 0.855 | 0.07 |
| 3556 | C | 0.19  | 0.09 |
| 3557 | C | 0.109 | 0.07 |
| 3558 | U | 0.231 | 0.44 |
| 3559 | G | 0.339 | 0.44 |
| 3560 | G | 0.556 | 0.32 |
| 3561 | A | 0.746 | 0.4  |
| 3562 | U | 0.597 | 0.88 |
| 3563 | A | 0.624 | 0.97 |
| 3564 | C | 0.163 | 0.98 |
| 3565 | C | 0.176 | 0.94 |
| 3566 | G | 0.827 | 0.67 |

|      |   |       |      |
|------|---|-------|------|
| 3567 | G | 1.424 | 0.38 |
| 3568 | A | 1.465 | 0.01 |
| 3569 | A | 1.655 | 0    |
| 3570 | U | 0.61  | 0    |
| 3571 | G | 0.122 | 0.29 |
| 3572 | G | 0.041 | 0.33 |
| 3573 | G | 0.176 | 0.31 |
| 3574 | A | 0.624 | 0.25 |
| 3575 | U | 0.529 | 0.02 |
| 3576 | U | 0.855 | 0.02 |
| 3577 | U | 0.665 | 0.02 |
| 3578 | U | 0.977 | 0.02 |
| 3579 | A | 0.936 | 0.02 |
| 3580 | U | 0.149 | 0.02 |
| 3581 | C | 0.081 | 0    |
| 3582 | U | 0.149 | 0    |
| 3583 | C | 0.163 | 0    |
| 3584 | A | 0.787 | 0    |
| 3585 | A | 1.248 | 0.01 |
| 3586 | C | 0.665 | 0.01 |
| 3587 | A | 0.732 | 0.01 |
| 3588 | C | 0.068 | 0.01 |
| 3589 | C | 0.095 | 0.01 |
| 3590 | A | 0.298 | 0.02 |
| 3591 | C | 0.136 | 0.01 |
| 3592 | C | 0.109 | 0.02 |
| 3593 | G | 0.095 | 0.03 |
| 3594 | C | 0.027 | 0.23 |
| 3595 | U | 0.203 | 0.24 |
| 3596 | A | 0.787 | 0.02 |
| 3597 | G | 0.624 | 0.02 |
| 3598 | U | 0.597 | 0.01 |
| 3599 | A | 1.289 | 0.01 |
| 3600 | A | 1.316 | 0.17 |
| 3601 | G | 0.692 | 0.28 |
| 3602 | A | 0.773 | 0.26 |
| 3603 | U | 0.475 | 0.5  |
| 3604 | U | 0.855 | 0.79 |
| 3605 | A | 1.275 | 0.68 |
| 3606 | G | 0.298 | 0.36 |
| 3607 | U | 0.163 | 0.02 |
| 3608 | C | 0.081 | 0.02 |
| 3609 | U | 0.19  | 0.04 |

|      |   |       |      |
|------|---|-------|------|
| 3610 | U | 0.312 | 0.03 |
| 3611 | C | 0.353 | 0.04 |
| 3612 | A | 1.139 | 0.17 |
| 3613 | A | 1.058 | 0.15 |
| 3614 | U | 0.312 | 0    |
| 3615 | C | 0.149 | 0.36 |
| 3616 | U | 0.298 | 0.6  |
| 3617 | A | 0.949 | 0.54 |
| 3618 | G | 0.827 | 0.38 |
| 3619 | U | 0.366 | 0.33 |
| 3620 | G | 1.004 | 0.15 |
| 3621 | A | 1.126 | 0.14 |
| 3622 | A | 1.18  | 0.14 |
| 3623 | G | 0.99  | 0.27 |
| 3624 | G | 1.031 | 0.28 |
| 3625 | A | 0.692 | 0.05 |
| 3626 | C | 0.027 | 0.05 |
| 3627 | C | 0.027 | 0.06 |
| 3628 | C | 0.027 | 0.04 |
| 3629 | U | 0.556 | 0.01 |
| 3630 | A | 1.309 | 0.25 |
| 3631 | U | 0.563 | 0.34 |
| 3632 | A | 1.974 | 0.12 |
| 3633 | G | 1.492 | 0.02 |
| 3634 | A | 1.451 | 0.02 |
| 3635 | G | 0.19  | 0.01 |
| 3636 | G | 0.163 | 0    |
| 3637 | G | 0.373 | 0    |
| 3638 | A | 1.478 | 0    |
| 3639 | G | 1.173 | 0    |
| 3640 | A | 1.662 | 0.03 |
| 3641 | A | 2.068 | 0.99 |
| 3642 | G | 0.97  | 0.99 |
| 3643 | A | 1.16  | 0.1  |
| 3644 | A | 0.977 | 0    |
| 3645 | A | 0.76  | 0    |
| 3646 | C | 0.231 | 0    |
| 3647 | C | 0.047 | 0.5  |
| 3648 | U | 0.102 | 0.52 |
| 3649 | A | 0.671 | 0.12 |
| 3650 | U | 0.353 | 0.49 |
| 3651 | U | 0.529 | 0.49 |
| 3652 | A | 1.784 | 0.02 |

|      |   |       |          |
|------|---|-------|----------|
| 3653 | U | 0.658 | 0.01     |
| 3654 | A | 0.99  | 0.01     |
| 3655 | C | 0.109 | 0.03     |
| 3656 | A | 1.56  | 0.05     |
| 3657 | G | 0.719 | 0.05     |
| 3658 | A | 1.051 | 0.03     |
| 3659 | U | 0.739 | 0        |
| 3660 | G | 0.719 | 0.01     |
| 3661 | G | 0.38  | 0        |
| 3662 | A | 0.339 | 0        |
| 3663 | U | 0.21  | 0.03     |
| 3664 | C | 0.007 | 0.03     |
| 3665 | A | 0.61  | 0.01     |
| 3666 | U | 0.502 | 0.04     |
| 3667 | G | 0.19  | 0.04     |
| 3668 | U | 0.129 | 0        |
| 3669 | A | 0.732 | 0        |
| 3670 | A | 0.848 | 7.88E-05 |
| 3671 | U | 0.556 | 0        |
| 3672 | A | 1.2   | 0        |
| 3673 | A | 0.997 | 0        |
| 3674 | A | 0.732 | 0        |
| 3675 | C | 0.298 | 1.68E-05 |
| 3676 | A | 1.085 | 0        |
| 3677 | G | 0.604 | 0        |
| 3678 | U | 0.237 | 0.78     |
| 3679 | C | 0.339 | 0.78     |
| 3680 | A | 1.099 | 0        |
| 3681 | A | 1.078 | 0        |
| 3682 | A | 1.16  | 0        |
| 3683 | A | 1.519 | 0        |
| 3684 | G | 0.909 | 0.66     |
| 3685 | A | 1.078 | 0.66     |
| 3686 | A | 1.37  | 0.12     |
| 3687 | G | 0.888 | 0.12     |
| 3688 | G | 0.712 | 0.12     |
| 3689 | G | 0.407 | 0.12     |
| 3690 | A | 0.576 | 0.12     |
| 3691 | A | 0.617 | 0.12     |
| 3692 | A | 1.105 | 0.19     |
| 3693 | G | 0.346 | 0.19     |
| 3694 | C | 0     | 0.2      |
| 3695 | A | 0.868 | 0.21     |

|      |   |       |      |
|------|---|-------|------|
| 3696 | G | 0.644 | 0.17 |
| 3697 | G | 0.387 | 0.1  |
| 3698 | A | 0.651 | 0.5  |
| 3699 | U | 0.298 | 0.56 |
| 3700 | A | 0.875 | 0.21 |
| 3701 | U | 0.427 | 0.46 |
| 3702 | A | 0.746 | 0.48 |
| 3703 | U | 0.339 | 0.45 |
| 3704 | C | 0.068 | 0.05 |
| 3705 | A | 0.8   | 0.02 |
| 3706 | C | 0.217 | 0.11 |
| 3707 | A | 1.2   | 0.22 |
| 3708 | G | 0.624 | 0.19 |
| 3709 | A | 0.658 | 0.45 |
| 3710 | U | 0.244 | 0.5  |
| 3711 | A | 1.038 | 0.49 |
| 3712 | G | 0.427 | 0.23 |
| 3713 | G | 0.156 | 0.22 |
| 3714 | G | 0.21  | 0.17 |
| 3715 | G | 0.136 | 0.08 |
| 3716 | C | 0.19  | 0.08 |
| 3717 | A | 0.78  | 0.03 |
| 3718 | A | 0.916 | 0.04 |
| 3719 | A | 1.39  | 0.08 |
| 3720 | G | 0.882 | 0.06 |
| 3721 | A | 0.319 | 0.02 |
| 3722 | C | 0.407 | 0.01 |
| 3723 | A | 0.922 | 0.01 |
| 3724 | A | 1.038 | 0.01 |
| 3725 | A | 0.97  | 0.02 |
| 3726 | G | 0.292 | 0.02 |
| 3727 | U | 0.739 | 0.04 |
| 3728 | A | 1.56  | 0.02 |
| 3729 | A | 1.105 | 0.01 |
| 3730 | A | 1.248 | 0    |
| 3731 | A | 1.322 | 0    |
| 3732 | G | 0.766 | 0    |
| 3733 | U | 0.332 | 0.01 |
| 3734 | G | 0.387 | 0.03 |
| 3735 | U | 0.387 | 0.16 |
| 3736 | U | 0.617 | 0.78 |
| 3737 | A | 1.282 | 0.84 |
| 3738 | G | 0.909 | 0.57 |

|      |   |       |      |
|------|---|-------|------|
| 3739 | A | 1.078 | 0.65 |
| 3740 | A | 0.78  | 0.45 |
| 3741 | C | 0.332 | 0.19 |
| 3742 | A | 1.051 | 0.23 |
| 3743 | G | 1.038 | 0.26 |
| 3744 | A | 0.617 | 0.23 |
| 3745 | C | 0.21  | 0.83 |
| 3746 | U | 0.264 | 0.91 |
| 3747 | A | 0.502 | 0.68 |
| 3748 | C | 0.109 | 0.1  |
| 3749 | U | 0.475 | 0.11 |
| 3750 | A | 0.658 | 0.11 |
| 3751 | A | 0.658 | 0.09 |
| 3752 | U | 0.454 | 0.07 |
| 3753 | C | 0.339 | 0.07 |
| 3754 | A | 0.909 | 0.08 |
| 3755 | A | 0.651 | 0.08 |
| 3756 | C | 0.264 | 0.1  |
| 3757 | A | 0.888 | 0.11 |
| 3758 | A | 0.875 | 0.25 |
| 3759 | G | 0.617 | 0.28 |
| 3760 | C | 0.366 | 0.09 |
| 3761 | A | 1.343 | 0.07 |
| 3762 | G | 1.044 | 0.07 |
| 3763 | A | 0.963 | 0.07 |
| 3764 | A | 0.949 | 0.02 |
| 3765 | U | 0.678 | 0.24 |
| 3766 | U | 0.637 | 0.84 |
| 3767 | G | 0.827 | 0.9  |
| 3768 | G | 0.651 | 0.82 |
| 3769 | A | 0.882 | 0.04 |
| 3770 | A | 0.882 | 0.04 |
| 3771 | G | 0.488 | 0.07 |
| 3772 | C | 0.231 | 0.06 |
| 3773 | A | 0.597 | 0.05 |
| 3774 | U | 0.231 | 0.86 |
| 3775 | U | 0.136 | 0.91 |
| 3776 | U | 0.054 | 0.91 |
| 3777 | C | 0     | 0.81 |
| 3778 | U | 0.122 | 0.45 |
| 3779 | C | 0     | 0.41 |
| 3780 | A | 0.461 | 0.09 |
| 3781 | U | 0.366 | 0.23 |



|      |   |       |      |
|------|---|-------|------|
| 3782 | G | 0.136 | 0.21 |
| 3783 | G | 0     | 0.21 |
| 3784 | C | 0     | 0.12 |
| 3785 | A | 0.19  | 0.07 |
| 3786 | U | 0.19  | 0.26 |
| 3787 | U | 0.678 | 0.3  |
| 3788 | G | 0.475 | 0.27 |
| 3789 | A | 0.298 | 0.01 |
| 3790 | C | 0.285 | 0.01 |
| 3791 | A | 1.072 | 0.02 |
| 3792 | G | 0.448 | 0.6  |
| 3793 | A | 0.366 | 0.89 |
| 3794 | C | 0.203 | 0.91 |
| 3795 | U | 0.244 | 0.8  |
| 3796 | C | 0.041 | 0.05 |
| 3797 | A | 0.746 | 0.02 |
| 3798 | G | 0.597 | 0.03 |
| 3799 | G | 0.61  | 0.07 |
| 3800 | G | 0     | 0.06 |
| 3801 | C | 0     | 0.07 |
| 3802 | C | 0.19  | 0.03 |
| 3803 | A | 0.827 | 0.03 |
| 3804 | A | 1.058 | 0.01 |
| 3805 | A | 1.031 | 0.01 |
| 3806 | G | 0.231 | 0.75 |
| 3807 | G | 0.109 | 0.87 |
| 3808 | C | 0     | 0.88 |
| 3809 | A | 0.515 | 0.59 |
| 3810 | A | 0.665 | 0.01 |
| 3811 | A | 1.031 | 0.03 |
| 3812 | U | 0.231 | 0.04 |
| 3813 | A | 0.963 | 0.1  |
| 3814 | U | 0.42  | 0.18 |
| 3815 | U | 0.678 | 0.2  |
| 3816 | A | 1.438 | 0.22 |
| 3817 | U | 0.42  | 0.47 |
| 3818 | A | 1.126 | 0.44 |
| 3819 | G | 0.583 | 0.15 |
| 3820 | U | 0.407 | 0.15 |
| 3821 | A | 1.072 | 0.07 |
| 3822 | G | 0.285 | 0.16 |
| 3823 | A | 0.42  | 0.4  |
| 3824 | U | 0.258 | 0.47 |

|      |   |       |      |
|------|---|-------|------|
| 3825 | U | 0.285 | 0.59 |
| 3826 | C | 0.149 | 0.56 |
| 3827 | A | 0.285 | 0.45 |
| 3828 | C | 0.326 | 0.47 |
| 3829 | A | 0.705 | 0.36 |
| 3830 | A | 0.909 | 0.12 |
| 3831 | U | 0.38  | 0.27 |
| 3832 | A | 1.085 | 0.22 |
| 3833 | U | 0.231 | 0.41 |
| 3834 | G | 0.231 | 0.36 |
| 3835 | U | 0.244 | 0.18 |
| 3836 | U | 0     | 0.04 |
| 3837 | A | 0.434 | 0.17 |
| 3838 | U | 0.176 | 0.75 |
| 3839 | G | 0.312 | 0.72 |
| 3840 | G | 0.203 | 0.57 |
| 3841 | G | 0.326 | 0.54 |
| 3842 | A | 0.366 | 0.5  |
| 3843 | A | 0.244 | 0.48 |
| 3844 | U | 0.556 | 0.53 |
| 3845 | A | 1.37  | 0.3  |
| 3846 | A | 0.882 | 0.2  |
| 3847 | U | 0.543 | 0.46 |
| 3848 | A | 1.139 | 0.32 |
| 3849 | A | 0.597 | 0.17 |
| 3850 | C | 0.068 | 0.18 |
| 3851 | A | 0.746 | 0.11 |
| 3852 | G | 0.515 | 0.09 |
| 3853 | G | 0.339 | 0.02 |
| 3854 | A | 0.746 | 0.04 |
| 3855 | U | 0.366 | 0.12 |
| 3856 | G | 0.122 | 0.12 |
| 3857 | C | 0     | 0.11 |
| 3858 | C | 0     | 0.23 |
| 3859 | C | 0.041 | 0.17 |
| 3860 | U | 0.231 | 0.14 |
| 3861 | A | 0.61  | 0.08 |
| 3862 | C | 0.136 | 0.12 |
| 3863 | A | 0.895 | 0.12 |
| 3864 | G | 0.855 | 0.07 |
| 3865 | A | 0.461 | 0.06 |
| 3866 | A | 0.678 | 0.05 |
| 3867 | U | 0.502 | 0.07 |

|      |   |       |      |
|------|---|-------|------|
| 3868 | C | 0.081 | 0.08 |
| 3869 | A | 0.949 | 0.1  |
| 3870 | G | 1.031 | 0.1  |
| 3871 | A | 1.004 | 0.08 |
| 3872 | G | 1.072 | 0    |
| 3873 | A | 0.882 | 0    |
| 3874 | G | 0.57  | 0    |
| 3875 | C | 0.42  | 0    |
| 3876 | A | 0.773 | 0    |
| 3877 | G | 0.041 | 0    |
| 3878 | G | 0     | 0.01 |
| 3879 | C | 0.014 | 0.56 |
| 3880 | U | 0.014 | 0.97 |
| 3881 | A | 0.231 | 0.46 |
| 3882 | G | 0.19  | 0.05 |
| 3883 | U | 0     | 0.08 |
| 3884 | U | 0.109 | 0.05 |
| 3885 | A | 0.014 | 0.53 |
| 3886 | A | 0.054 | 0.5  |
| 3887 | U | 0     | 0.01 |
| 3888 | C | 0.014 | 0.01 |
| 3889 | A | 0.339 | 0.11 |
| 3890 | A | 0.637 | 0.11 |
| 3891 | A | 0.597 | 0.2  |
| 3892 | U | 0.583 | 0.3  |
| 3893 | A | 0.936 | 0.22 |
| 3894 | A | 0.882 | 0.28 |
| 3895 | U | 0.57  | 0.82 |
| 3896 | A | 1.261 | 0.76 |
| 3897 | G | 1.044 | 0.12 |
| 3898 | A | 1.139 | 0.01 |
| 3899 | A | 1.166 | 0    |
| 3900 | G | 1.302 | 0.01 |
| 3901 | A | 1.004 | 0.02 |
| 3902 | A | 0.732 | 0.1  |
| 3903 | A | 0.977 | 0.19 |
| 3904 | U | 0.326 | 0.23 |
| 3905 | G | 0     | 0.18 |
| 3906 | A | 0.122 | 0.22 |
| 3907 | U | 0.041 | 0.24 |
| 3908 | U | 0.244 | 0.16 |
| 3909 | A | 0.285 | 0.14 |
| 3910 | A | 0.298 | 0.02 |

|      |   |       |      |
|------|---|-------|------|
| 3911 | A | 0.353 | 0    |
| 3912 | A | 0.38  | 0.01 |
| 3913 | A | 0.19  | 0.01 |
| 3914 | G | 0.041 | 0.01 |
| 3915 | U | 0.122 | 0.01 |
| 3916 | C | 0.095 | 0.07 |
| 3917 | A | 0.909 | 0.23 |
| 3918 | G | 1.112 | 0.21 |
| 3919 | A | 1.085 | 0.67 |
| 3920 | A | 0.882 | 0.66 |
| 3921 | A | 0.746 | 0.42 |
| 3922 | U | 0.529 | 0.24 |
| 3923 | U | 0.841 | 0.05 |
| 3924 | U | 0.665 | 0.13 |
| 3925 | A | 1.601 | 0.13 |
| 3926 | U | 0.57  | 0.24 |
| 3927 | G | 0.909 | 0.36 |
| 3928 | U | 0.475 | 0.7  |
| 3929 | A | 0.787 | 0.78 |
| 3930 | G | 0.407 | 0.4  |
| 3931 | C | 0.38  | 0.01 |
| 3932 | A | 0.746 | 0.09 |
| 3933 | U | 0.271 | 0.67 |
| 3934 | G | 0.176 | 0.71 |
| 3935 | G | 0     | 0.61 |
| 3936 | G | 0     | 0.51 |
| 3937 | U | 0.203 | 0.2  |
| 3938 | A | 0.624 | 0    |
| 3939 | C | 0.027 | 0    |
| 3940 | C | 0.122 | 0.04 |
| 3941 | A | 0.434 | 0.04 |
| 3942 | G | 0.475 | 0.19 |
| 3943 | C | 0.332 | 0.52 |
| 3944 | A | 0.366 | 0.58 |
| 3945 | C | 0     | 0.59 |
| 3946 | A | 0.176 | 0.53 |
| 3947 | C | 0.461 | 0.06 |
| 3948 | A | 0.922 | 0.04 |
| 3949 | A | 0.882 | 0.01 |
| 3950 | A | 1.031 | 0    |
| 3951 | G | 0.285 | 0.01 |
| 3952 | G | 0.373 | 0.01 |
| 3953 | U | 0.122 | 0.01 |

|      |   |       |      |
|------|---|-------|------|
| 3954 | A | 0.99  | 0.01 |
| 3955 | U | 0.461 | 0.05 |
| 3956 | A | 1.248 | 0.05 |
| 3957 | G | 0.482 | 0.04 |
| 3958 | G | 0.543 | 0.04 |
| 3959 | A | 0.387 | 0.04 |
| 3960 | G | 0.271 | 0.04 |
| 3961 | G | 0.339 | 0.03 |
| 3962 | A | 0.509 | 0.02 |
| 3963 | A | 0.712 | 0.02 |
| 3964 | A | 0.583 | 0.02 |
| 3965 | C | 0.237 | 0.04 |
| 3966 | C | 0.149 | 0.04 |
| 3967 | A | 0.766 | 0.01 |
| 3968 | A | 0.821 | 0.01 |
| 3969 | G | 1.099 | 0    |
| 3970 | A | 1.18  | 0    |
| 3971 | A | 0.888 | 0.02 |
| 3972 | A | 1.146 | 0.02 |
| 3973 | U | 0.644 | 0.55 |
| 3974 | A | 0.977 | 0.57 |
| 3975 | G | 0.509 | 0.53 |
| 3976 | A | 0.509 | 0.02 |
| 3977 | C | 0     | 0.03 |
| 3978 | C | 0.197 | 0.03 |
| 3979 | A | 0.278 | 0.03 |
| 3980 | C | 0     | 0.02 |
| 3981 | C | 0.075 | 0.58 |
| 3982 | U | 0.393 | 0.63 |
| 3983 | A | 0.916 | 0.56 |
| 3984 | G | 0.78  | 0.01 |
| 3985 | U | 0.468 | 0.01 |
| 3986 | U | 0.773 | 0.03 |
| 3987 | A | 1.044 | 0.02 |
| 3988 | G | 0.393 | 0.03 |
| 3989 | U | 0.326 | 0    |
| 3990 | C | 0.129 | 0    |
| 3991 | A | 0.719 | 0    |
| 3992 | A | 0.8   | 0.01 |
| 3993 | G | 0.319 | 0.02 |
| 3994 | G | 0.305 | 0.05 |
| 3995 | G | 0.631 | 0.05 |
| 3996 | A | 0.699 | 0.05 |

|      |   |       |      |
|------|---|-------|------|
| 3997 | U | 0.448 | 0.04 |
| 3998 | U | 0.475 | 0.04 |
| 3999 | A | 1.078 | 0.24 |
| 4000 | G | 0.719 | 0.24 |
| 4001 | A | 0.916 | 0.03 |
| 4002 | C | 0.231 | 0.02 |
| 4003 | A | 0.963 | 0.02 |
| 4004 | A | 0.997 | 0.02 |
| 4005 | G | 0.434 | 0.04 |
| 4006 | U | 0.353 | 0.05 |
| 4007 | U | 0.488 | 0.07 |
| 4008 | C | 0.339 | 0.31 |
| 4009 | U | 0.19  | 0.3  |
| 4010 | C | 0.136 | 0.08 |
| 4011 | U | 0.176 | 0.09 |
| 4012 | U | 0.285 | 0.07 |
| 4013 | C | 0.231 | 0.01 |
| 4014 | U | 0.163 | 0.05 |
| 4015 | U | 0.014 | 0.06 |
| 4016 | G | 0.068 | 0.04 |
| 4017 | G | 0.583 | 0    |
| 4018 | A | 1.777 | 0    |
| 4019 | A | 0.773 | 0.01 |
| 4020 | A | 1.275 | 0.01 |
| 4021 | A | 1.017 | 0.02 |
| 4022 | G | 0.705 | 0.03 |
| 4023 | A | 1.004 | 0.13 |
| 4024 | U | 0.57  | 0.21 |
| 4025 | A | 1.641 | 0.21 |
| 4026 | G | 1.248 | 0.09 |
| 4027 | A | 0.922 | 0.02 |
| 4028 | G | 0.773 | 0.02 |
| 4029 | C | 0.231 | 0.01 |
| 4030 | C | 0.271 | 0.01 |
| 4031 | A | 0.502 | 0.12 |
| 4032 | G | 0.678 | 0.16 |
| 4033 | C | 0.176 | 0.16 |
| 4034 | A | 1.451 | 0.17 |
| 4035 | C | 0     | 0.04 |
| 4036 | A | 0.366 | 0.04 |
| 4037 | A | 0.366 | 0.01 |
| 4038 | G | 0.543 | 0.01 |
| 4039 | A | 0.366 | 0    |

|      |   |       |      |
|------|---|-------|------|
| 4040 | A | 0.488 | 0.04 |
| 4041 | G | 0.42  | 0.04 |
| 4042 | A | 0.773 | 0.01 |
| 4043 | A | 0.705 | 0.01 |
| 4044 | C |       | 0.02 |
| 4045 | A | 1.112 | 0.24 |
| 4046 | U | 0.217 | 0.28 |
| 4047 | G | 1.058 | 0.24 |
| 4048 | A | 1.831 | 0.03 |
| 4049 | U | 1.329 | 0.02 |
| 4050 | A | 2.414 | 0.03 |
| 4051 | A | 0.42  | 0.03 |
| 4052 | A | 0.461 | 0.07 |
| 4053 | U | 0.19  | 0.38 |
| 4054 | A | 0.298 | 0.37 |
| 4055 | C | 0     | 0.3  |
| 4056 | C | 0     | 0.25 |
| 4057 | A | 0     | 0.77 |
| 4058 | U | 0.298 | 0.85 |
| 4059 | A | 0.597 | 0.26 |
| 4060 | G | 0.095 | 0.18 |
| 4061 | U | 0.624 | 0.16 |
| 4062 | A | 0.963 | 0.15 |
| 4063 | A | 1.112 | 0.63 |
| 4064 | U | 0.461 | 0.74 |
| 4065 | G | 0.882 | 0.49 |
| 4066 | U | 0.977 | 0.57 |
| 4067 | A | 1.614 | 0.45 |
| 4068 | A | 1.058 | 0.09 |
| 4069 | A | 1.329 | 0.08 |
| 4070 | A | 0.949 | 0.09 |
| 4071 | G | 0.909 | 0.08 |
| 4072 | A | 1.004 | 0.05 |
| 4073 | A | 1.112 | 0.05 |
| 4074 | U | 0.42  | 0.2  |
| 4075 | U | 0.163 | 0.21 |
| 4076 | G | 0.014 | 0.05 |
| 4077 | G | 0.258 | 0    |
| 4078 | U | 0.176 | 0.01 |
| 4079 | A | 0.339 | 0.05 |
| 4080 | U | 0.122 | 0.85 |
| 4081 | U | 1.194 | 0.87 |
| 4082 | C | 0.787 | 0.65 |

|      |   |       |      |
|------|---|-------|------|
| 4083 | A | 1.356 | 0.45 |
| 4084 | A | 1.112 | 0.1  |
| 4085 | A | 0.651 | 0.48 |
| 4086 | U | 0.353 | 0.72 |
| 4087 | U | 0.556 | 0.69 |
| 4088 | U | 0.244 | 0.75 |
| 4089 | G | 0.231 | 0.74 |
| 4090 | G | 0.651 | 0.25 |
| 4091 | A | 0.556 | 0.17 |
| 4092 | U | 0.583 | 0.45 |
| 4093 | U | 0.448 | 0.43 |
| 4094 | A | 0.285 | 0.12 |
| 4095 | C | 0.326 | 0.18 |
| 4096 | C | 0     | 0.14 |
| 4097 | C | 0.095 | 0.04 |
| 4098 | A | 0.543 | 0.11 |
| 4099 | G | 0.76  | 0.45 |
| 4100 | A | 1.126 | 0.52 |
| 4101 | A | 1.139 | 0.83 |
| 4102 | U | 0.353 | 0.8  |
| 4103 | A | 1.451 | 0.21 |
| 4104 | G | 0.827 | 0.17 |
| 4105 | U | 0.434 | 0.27 |
| 4106 | G | 0.149 | 0.15 |
| 4107 | G | 0.203 | 0.04 |
| 4108 | C | 0.081 | 0.05 |
| 4109 | C | 0.285 | 0.11 |
| 4110 | A | 0.855 | 0.55 |
| 4111 | G | 0.855 | 0.5  |
| 4112 | A | 0.583 | 0.22 |
| 4113 | C | 0.068 | 0.6  |
| 4114 | A | 1.126 | 0.55 |
| 4115 | G | 0.732 | 0.56 |
| 4116 | A | 0.936 | 0.6  |
| 4117 | U | 0.407 | 0.68 |
| 4118 | A | 1.234 | 0.29 |
| 4119 | G | 0.827 | 0.23 |
| 4120 | U | 0.787 | 0.62 |
| 4121 | A | 1.37  | 0.59 |
| 4122 | G | 0.692 | 0.24 |
| 4123 | A | 1.044 | 0.3  |
| 4124 | C | 0.529 | 0.22 |
| 4125 | A | 0.502 | 0.07 |



|      |   |       |      |
|------|---|-------|------|
| 4126 | C | 0.217 | 0.1  |
| 4127 | C | 0.244 | 0.15 |
| 4128 | U | 0.244 | 0.42 |
| 4129 | G | 0.922 | 0.57 |
| 4130 | U | 0.326 | 0.4  |
| 4131 | G | 0.543 | 0.11 |
| 4132 | A | 0.868 | 0.04 |
| 4133 | U | 0.597 | 0.01 |
| 4134 | A | 1.397 | 0.06 |
| 4135 | A | 1.261 | 0.21 |
| 4136 | A | 0.827 | 0.48 |
| 4137 | U | 0.434 | 0.87 |
| 4138 | G | 0.339 | 0.78 |
| 4139 | U | 0.176 | 0.04 |
| 4140 | C | 0.163 | 0.03 |
| 4141 | A | 0.57  | 0.02 |
| 4142 | U | 0.42  | 0.01 |
| 4143 | C | 0     | 0.11 |
| 4144 | A | 1.072 | 0.11 |
| 4145 | G | 1.221 | 0.02 |
| 4146 | A | 1.424 | 0.03 |
| 4147 | A | 1.275 | 0.02 |
| 4148 | A | 1.451 | 0.02 |
| 4149 | G | 0.787 | 0.03 |
| 4150 | G | 0.746 | 0.03 |
| 4151 | A | 0.773 | 0.01 |
| 4152 | G | 0.922 | 0.03 |
| 4153 | A | 1.356 | 0.03 |
| 4154 | G | 0.326 | 0.03 |
| 4155 | G | 0.224 | 0.05 |
| 4156 | C | 0     | 0.21 |
| 4157 | U | 0.319 | 0.23 |
| 4158 | A | 1.173 | 0.32 |
| 4159 | U | 0.773 | 0.2  |
| 4160 | A | 1.424 | 0.1  |
| 4161 | C | 0.814 | 0.26 |
| 4162 | A | 1.567 | 0.31 |
| 4163 | U | 0.848 | 0.83 |
| 4164 | G | 0.597 | 0.61 |
| 4165 | G | 0.353 | 0.26 |
| 4166 | G | 0.475 | 0.06 |
| 4167 | C | 0.102 | 0.22 |
| 4168 | A | 0.387 | 0.23 |

|      |   |       |      |
|------|---|-------|------|
| 4169 | G | 0.359 | 0.09 |
| 4170 | G | 0.393 | 0.15 |
| 4171 | C | 0.183 | 0.27 |
| 4172 | A | 0.563 | 0.23 |
| 4173 | A | 0.482 | 0.31 |
| 4174 | A | 0.515 | 0.41 |
| 4175 | U | 0.366 | 0.7  |
| 4176 | U | 0.787 | 0.42 |
| 4177 | C | 0.434 | 0.37 |
| 4178 | A | 1.268 | 0.31 |
| 4179 | G | 0.977 | 0.3  |
| 4180 | A | 1.133 | 0.26 |
| 4181 | U | 0.556 | 0.62 |
| 4182 | C | 0.373 | 0.76 |
| 4183 | U | 0     | 0.66 |
| 4184 | A | 0.719 | 0.28 |
| 4185 | G | 0.549 | 0.1  |
| 4186 | G | 0.949 | 0.08 |
| 4187 | G | 1.207 | 0.02 |
| 4188 | A | 1.085 | 0.17 |
| 4189 | C | 0.678 | 0.2  |
| 4190 | U | 0.258 | 0.31 |
| 4191 | U | 0.4   | 0.76 |
| 4192 | G | 0.292 | 0.78 |
| 4193 | G | 0.203 | 0.7  |
| 4194 | C | 0.109 | 0.71 |
| 4195 | A | 0.766 | 0.5  |
| 4196 | A | 0.943 | 0.49 |
| 4197 | A | 0.76  | 0.83 |
| 4198 | U | 0.488 | 0.87 |
| 4199 | G | 0.475 | 0.76 |
| 4200 | G | 0.719 | 0.26 |
| 4201 | A | 0.821 | 0.63 |
| 4202 | U | 0.468 | 0.8  |
| 4203 | U | 0.224 | 0.85 |
| 4204 | G | 0.258 | 0.83 |
| 4205 | U | 0.034 | 0.67 |
| 4206 | A | 0.461 | 0.3  |
| 4207 | C | 0.868 | 0.2  |
| 4208 | C | 0.841 | 0.2  |
| 4209 | C | 0.841 | 0.2  |
| 4210 | A | 0.468 | 0.31 |
| 4211 | U | 0.231 | 0.47 |

|      |   |       |      |
|------|---|-------|------|
| 4212 | C | 0.285 | 0.72 |
| 4213 | U | 0.163 | 0.51 |
| 4214 | A | 0.359 | 0.15 |
| 4215 | G | 0.821 | 0.06 |
| 4216 | A | 0.665 | 0.05 |
| 4217 | G | 0.549 | 0.16 |
| 4218 | G | 0.536 | 0.19 |
| 4219 | G | 1.207 | 0.25 |
| 4220 | A | 1.336 | 0.37 |
| 4221 | A | 1.316 | 0.31 |
| 4222 | A | 1.044 | 0.21 |
| 4223 | A | 1.146 | 0.14 |
| 4224 | A | 0.855 | 0.2  |
| 4225 | U | 1.194 | 0.42 |
| 4226 | A | 0.699 | 0.27 |
| 4227 | A | 0.732 | 0.16 |
| 4228 | U | 0.536 | 0.23 |
| 4229 | C | 0.271 | 0.14 |
| 4230 | A | 0.916 | 0.2  |
| 4231 | U | 0.766 | 0.35 |
| 4232 | A | 0.624 | 0.32 |
| 4233 | G | 0.556 | 0.54 |
| 4234 | U | 0.298 | 0.51 |
| 4235 | U | 0.19  | 0.18 |
| 4236 | G | 0.258 | 0.66 |
| 4237 | C | 0.454 | 0.78 |
| 4238 | A | 0.278 | 0.79 |
| 4239 | G | 0.502 | 0.74 |
| 4240 | U | 1.024 | 0.67 |
| 4241 | A | 0.8   | 0.26 |
| 4242 | C | 0.346 | 0.68 |
| 4243 | A | 1.099 | 0.73 |
| 4244 | U | 0.088 | 0.87 |
| 4245 | G | 0.109 | 0.25 |
| 4246 | U | 0.19  | 0.55 |
| 4247 | A | 0.285 | 0.59 |
| 4248 | G | 0.115 | 0.79 |
| 4249 | C | 0.081 | 0.81 |
| 4250 | U | 0.034 | 0.81 |
| 4251 | A | 0.007 | 0.77 |
| 4252 | G | 4.469 | 0.38 |
| 4253 | U | 0.278 | 0.43 |
| 4254 | G | 1.058 | 0.38 |

|      |   |       |      |
|------|---|-------|------|
| 4255 | G | 0.461 | 0.29 |
| 4256 | A | 0.244 | 0.32 |
| 4257 | U | 0.597 | 0.51 |
| 4258 | U | 0.448 | 0.53 |
| 4259 | C | 0.855 | 0.49 |
| 4260 | A | 0.875 | 0.19 |
| 4261 | U | 1.39  | 0.26 |
| 4262 | A | 1.16  | 0.14 |
| 4263 | G | 0.556 | 0.08 |
| 4264 | A | 0.427 | 0.07 |
| 4265 | A | 0.366 | 0.06 |
| 4266 | G | 0.176 | 0.11 |
| 4267 | C | 0.258 | 0.22 |
| 4268 | A | 0.109 | 0.21 |
| 4269 | G | 0.339 | 0.18 |
| 4270 | A | 0.475 | 0.16 |
| 4271 | G | 0     | 0.12 |
| 4272 | G | 0     | 0.13 |
| 4273 | U | 0.936 | 0.14 |
| 4274 | A | 0.909 | 0.08 |
| 4275 | A | 1.316 | 0.14 |
| 4276 | U | 0.258 | 0.16 |
| 4277 | U | 0     | 0.06 |
| 4278 | C | 0     | 0.07 |
| 4279 | C | 1.546 | 0.06 |
| 4280 | A | 0     | 0.04 |
| 4281 | C | 0.665 | 0.05 |
| 4282 | A | 1.072 | 0.1  |
| 4283 | A | 0.203 | 0.13 |
| 4284 | G | 1.451 | 0.24 |
| 4285 | A | 0.76  | 0.49 |
| 4286 | G | 1.112 | 0.78 |
| 4287 | A | 0.407 | 0.49 |
| 4288 | C | 0.814 | 0.33 |
| 4289 | A | 1.302 | 0.87 |
| 4290 | G | 0     | 0.97 |
| 4291 | G | 0.827 | 0.98 |
| 4292 | A | 1.519 | 0.97 |
| 4293 | A | 0.637 | 0.97 |
| 4294 | G | 0.705 | 0.91 |
| 4295 | A | 0.99  | 0.76 |
| 4296 | C | 0.719 | 0.04 |
| 4297 | A | 1.072 | 0.11 |

|      |   |       |      |
|------|---|-------|------|
| 4298 | G | 1.153 | 0.13 |
| 4299 | A | 1.424 | 0.06 |
| 4300 | C | 1.044 | 0.03 |
| 4301 | A | 0     | 0.03 |
| 4302 | G | 0     | 0.03 |
| 4303 | C | 0.407 | 0.03 |
| 4304 | A | 0.61  | 0.1  |
| 4305 | C | 0.624 | 0.16 |
| 4306 | U | 0.258 | 0.84 |
| 4307 | A | 0.203 | 0.9  |
| 4308 | U | 0.109 | 0.97 |
| 4309 | U | 0.014 | 0.99 |
| 4310 | U | 0     | 0.99 |
| 4311 | C | 0.081 | 0.97 |
| 4312 | U | 0.122 | 0.87 |
| 4313 | G | 0     | 0.45 |
| 4314 | U | 0.217 | 0.81 |
| 4315 | U | 1.112 | 0.79 |
| 4316 | A | 1.017 | 0.39 |
| 4317 | A | 0.895 | 0.28 |
| 4318 | A | 0.787 | 0.28 |
| 4319 | A | 1.207 | 0.29 |
| 4320 | U | 0.977 | 0.36 |
| 4321 | U | 1.126 | 0.44 |
| 4322 | G | 0.081 | 0.32 |
| 4323 | G | 0.136 | 0.29 |
| 4324 | C | 0.081 | 0.26 |
| 4325 | A | 0.488 | 0.26 |
| 4326 | G | 0.312 | 0.33 |
| 4327 | G | 0.285 | 0.28 |
| 4328 | C | 0.529 | 0.22 |
| 4329 | A | 0.963 | 0.46 |
| 4330 | G | 0.773 | 0.49 |
| 4331 | A | 0.366 | 0.37 |
| 4332 | U | 0.543 | 0.73 |
| 4333 | G | 0.57  | 0.86 |
| 4334 | G | 0.231 | 0.64 |
| 4335 | C | 0.027 | 0.37 |
| 4336 | C | 0.543 | 0.28 |
| 4337 | U | 0.868 | 0.27 |
| 4338 | A | 0.76  | 0.33 |
| 4339 | U | 1.058 | 0.27 |
| 4340 | U | 2.048 | 0.13 |

|      |   |       |      |
|------|---|-------|------|
| 4341 | A | 1.139 | 0.11 |
| 4342 | C | 1.194 | 0.2  |
| 4343 | A | 0.353 | 0.17 |
| 4344 | C | 0.814 | 0.36 |
| 4345 | A | 0.475 | 0.34 |
| 4346 | U | 0.217 | 0.44 |
| 4347 | C | 0.882 | 0.77 |
| 4348 | U | 1.831 | 0.62 |
| 4349 | A | 0.502 | 0.33 |
| 4350 | C | 2.021 | 0.25 |
| 4351 | A | 0.827 | 0.19 |
| 4352 | C | 0.326 | 0.2  |
| 4353 | A | 0.271 | 0.21 |
| 4354 | C | 0.366 | 0.27 |
| 4355 | A | 0.041 | 0.43 |
| 4356 | G | 0.529 | 0.45 |
| 4357 | A | 1.004 | 0.22 |
| 4358 | U | 0.38  | 0.21 |
| 4359 | A | 0     | 0.22 |
| 4360 | A | 0.326 | 0.25 |
| 4361 | U | 0.122 | 0.34 |
| 4362 | G | 0.529 | 0.43 |
| 4363 | G | 0     | 0.36 |
| 4364 | U | 0.231 | 0.42 |
| 4365 | G | 0     | 0.39 |
| 4366 | C | 0.42  | 0.49 |
| 4367 | U | 0.827 | 0.55 |
| 4368 | A | 1.112 | 0.5  |
| 4369 | A | 0.787 | 0.34 |
| 4370 | C | 0.285 | 0.51 |
| 4371 | U | 0.339 | 0.53 |
| 4372 | U | 0.502 | 0.43 |
| 4373 | U | 1.044 | 0.42 |
| 4374 | G | 0     | 0.39 |
| 4375 | C | 0.556 | 0.38 |
| 4376 | U | 0.583 | 0.39 |
| 4377 | U | 0.081 | 0.44 |
| 4378 | C | 0.719 | 0.44 |
| 4379 | G | 0.868 | 0.44 |
| 4380 | C | 0     | 0.24 |
| 4381 | A | 0.515 | 0.03 |
| 4382 | A | 0.136 | 0.04 |
| 4383 | G | 0.515 | 0.15 |

|      |   |       |      |
|------|---|-------|------|
| 4384 | A | 0.217 | 0.14 |
| 4385 | A | 0.38  | 0.07 |
| 4386 | G | 0.163 | 0.33 |
| 4387 | U | 0.502 | 0.34 |
| 4388 | A | 0.448 | 0.3  |
| 4389 | A | 0.475 | 0.28 |
| 4390 | A | 0.719 | 0.13 |
| 4391 | G | 0.475 | 0.23 |
| 4392 | A | 0.624 | 0.17 |
| 4393 | U | 0     | 0.47 |
| 4394 | G | 0.271 | 0.55 |
| 4395 | G | 0.068 | 0.5  |
| 4396 | U | 0.651 | 0.5  |
| 4397 | U | 0.597 | 0.4  |
| 4398 | G | 0.515 | 0.05 |
| 4399 | C | 0.19  | 0.09 |
| 4400 | A | 0.475 | 0.08 |
| 4401 | U | 0.637 | 0.31 |
| 4402 | G | 0.176 | 0.35 |
| 4403 | G | 0.19  | 0.6  |
| 4404 | U | 0.176 | 0.66 |
| 4405 | G | 0.271 | 0.64 |
| 4406 | G | 0.665 | 0.48 |
| 4407 | G | 1.397 | 0.55 |
| 4408 | C | 0.041 | 0.87 |
| 4409 | A | 1.207 | 0.79 |
| 4410 | G | 0.909 | 0.51 |
| 4411 | G | 0.922 | 0.46 |
| 4412 | G | 0.244 | 0.04 |
| 4413 | A | 0.705 | 0.06 |
| 4414 | U | 0.57  | 0.48 |
| 4415 | A | 1.085 | 0.48 |
| 4416 | G | 0.977 | 0.22 |
| 4417 | A | 0.855 | 0.25 |
| 4418 | G | 1.234 | 0.25 |
| 4419 | C | 0.353 | 0.09 |
| 4420 | A | 0.651 | 0.07 |
| 4421 | C | 0.475 | 0.04 |
| 4422 | A | 0.529 | 0.07 |
| 4423 | C | 0.543 | 0.15 |
| 4424 | C | 0.882 | 0.23 |
| 4425 | U | 0.977 | 0.44 |
| 4426 | U | 0.326 | 0.32 |

|      |   |       |      |
|------|---|-------|------|
| 4427 | U | 0.787 | 0.21 |
| 4428 | G | 0.502 | 0.24 |
| 4429 | G | 0.203 | 0.23 |
| 4430 | G | 0     | 0.07 |
| 4431 | G | 0.068 | 0.15 |
| 4432 | U | 0.285 | 0.2  |
| 4433 | A | 0.42  | 0.12 |
| 4434 | C | 0.068 | 0.31 |
| 4435 | C | 0.149 | 0.42 |
| 4436 | A | 0.678 | 0.24 |
| 4437 | U | 0.407 | 0.32 |
| 4438 | A | 0.543 | 0.25 |
| 4439 | C | 1.072 | 0.09 |
| 4440 | A | 1.166 | 0.03 |
| 4441 | A | 0.543 | 0.29 |
| 4442 | U | 0.231 | 0.43 |
| 4443 | C | 0.149 | 0.45 |
| 4444 | C | 0.176 | 0.42 |
| 4445 | A | 0.285 | 0.39 |
| 4446 | C | 0.027 | 0.37 |
| 4447 | A | 0.543 | 0.08 |
| 4448 | G | 0.692 | 0.05 |
| 4449 | A | 0.583 | 0.02 |
| 4450 | G | 0.38  | 0.14 |
| 4451 | U | 0.515 | 0.17 |
| 4452 | C | 0.448 | 0.24 |
| 4453 | A | 0.678 | 0.2  |
| 4454 | G | 0.448 | 0.04 |
| 4455 | G | 0.543 | 0.2  |
| 4456 | G | 0.61  | 0.21 |
| 4457 | A | 0.814 | 0.07 |
| 4458 | G | 0.448 | 0.24 |
| 4459 | U | 0.081 | 0.46 |
| 4460 | A | 0.665 | 0.45 |
| 4461 | G | 0.285 | 0.51 |
| 4462 | U | 0.393 | 0.32 |
| 4463 | G | 0.515 | 0.15 |
| 4464 | G | 0.393 | 0.15 |
| 4465 | A | 0.637 | 0.1  |
| 4466 | A | 0.8   | 0.09 |
| 4467 | G | 0.393 | 0.26 |
| 4468 | C | 0.068 | 0.44 |
| 4469 | A | 0.231 | 0.43 |



|      |   |       |      |
|------|---|-------|------|
| 4470 | A | 0.298 | 0.4  |
| 4471 | U | 0.149 | 0.42 |
| 4472 | G | 0.217 | 0.31 |
| 4473 | A | 0.163 | 0.03 |
| 4474 | A | 0.095 | 0.05 |
| 4475 | U | 0.746 | 0.14 |
| 4476 | C | 0.231 | 0.13 |
| 4477 | A | 0.909 | 0.1  |
| 4478 | C | 0.699 | 0.12 |
| 4479 | C | 0.719 | 0.21 |
| 4480 | A | 0.8   | 0.14 |
| 4481 | C | 0.414 | 0.08 |
| 4482 | C | 0.705 | 0.15 |
| 4483 | U | 0.488 | 0.15 |
| 4484 | G | 0.387 | 0.07 |
| 4485 | A | 0.482 | 0    |
| 4486 | A | 0.868 | 0    |
| 4487 | A | 0.766 | 0    |
| 4488 | A | 0.468 | 0    |
| 4489 | A | 0.339 | 0    |
| 4490 | U | 1.038 | 0    |
| 4491 | C | 0.38  | 0.01 |
| 4492 | A | 1.065 | 0.01 |
| 4493 | A | 1.268 | 0.02 |
| 4494 | A | 2.13  | 0.39 |
| 4495 | U | 0.461 | 0.41 |
| 4496 | A | 0.861 | 0.13 |
| 4497 | G | 0.285 | 0.12 |
| 4498 | A | 0.4   | 0.11 |
| 4499 | U | 1.241 | 0.12 |
| 4500 | A | 1.241 | 0.3  |
| 4501 | G | 0.888 | 0.35 |
| 4502 | A | 1.051 | 0.17 |
| 4503 | A | 0.414 | 0.54 |
| 4504 | U | 0.197 | 0.54 |
| 4505 | C | 0.203 | 0.21 |
| 4506 | A | 0.427 | 0.22 |
| 4507 | G | 0.264 | 0.22 |
| 4508 | G | 0.19  | 0.28 |
| 4509 | G | 0.482 | 0.28 |
| 4510 | A | 0.61  | 0.29 |
| 4511 | A | 0.495 | 0.3  |
| 4512 | C | 0.617 | 0.35 |

|      |   |       |      |
|------|---|-------|------|
| 4513 | A | 0.644 | 0.33 |
| 4514 | A | 0.536 | 0.21 |
| 4515 | G | 0.434 | 0.36 |
| 4516 | C | 0.414 | 0.64 |
| 4517 | A | 0.583 | 0.66 |
| 4518 | A | 0.549 | 0.39 |
| 4519 | A | 0.563 | 0.21 |
| 4520 | U | 0.332 | 0.75 |
| 4521 | U | 0.366 | 0.69 |
| 4522 | C | 0.353 | 0.37 |
| 4523 | A | 0.305 | 0.49 |
| 4524 | G | 0.536 | 0.51 |
| 4525 | U | 0.509 | 0.51 |
| 4526 | A | 1.031 | 0.43 |
| 4527 | G | 0.576 | 0.31 |
| 4528 | A | 0.814 | 0.05 |
| 4529 | A | 1.146 | 0.03 |
| 4530 | A | 0.353 | 0.18 |
| 4531 | C | 0.468 | 0.21 |
| 4532 | C | 0.42  | 0.07 |
| 4533 | A | 0.4   | 0.09 |
| 4534 | U | 0.42  | 0.71 |
| 4535 | A | 1.295 | 0.75 |
| 4536 | G | 1.031 | 0.35 |
| 4537 | U | 0.834 | 0.43 |
| 4538 | A | 1.173 | 0.29 |
| 4539 | U | 0.963 | 0.66 |
| 4540 | U | 0.753 | 0.65 |
| 4541 | A | 1.16  | 0.3  |
| 4542 | A | 0.705 | 0.34 |
| 4543 | U | 0.244 | 0.71 |
| 4544 | G | 0.095 | 0.66 |
| 4545 | G | 0.244 | 0.58 |
| 4546 | C | 0.176 | 0.74 |
| 4547 | A | 0.434 | 0.73 |
| 4548 | G | 0.203 | 0.36 |
| 4549 | U | 0.122 | 0.24 |
| 4550 | U | 0.19  | 0.22 |
| 4551 | C | 0.081 | 0.41 |
| 4552 | A | 0.393 | 0.4  |
| 4553 | U | 0.461 | 0.45 |
| 4554 | U | 0.095 | 0.91 |
| 4555 | G | 0.339 | 0.93 |

|      |   |       |      |
|------|---|-------|------|
| 4556 | C | 0.38  | 0.88 |
| 4557 | A | 1.397 | 0.73 |
| 4558 | U | 0.705 | 0.95 |
| 4559 | G | 1.099 | 0.96 |
| 4560 | A | 0.882 | 0.97 |
| 4561 | A | 0.977 | 0.97 |
| 4562 | U | 0.502 | 0.99 |
| 4563 | U | 0.502 | 1    |
| 4564 | U | 0.841 | 0.99 |
| 4565 | U | 0.977 | 0.95 |
| 4566 | A | 1.261 | 0.06 |
| 4567 | A | 1.424 | 0.04 |
| 4568 | A | 1.668 | 0.05 |
| 4569 | A | 1.343 | 0.04 |
| 4570 | G | 1.126 | 0.03 |
| 4571 | A | 1.424 | 0.05 |
| 4572 | A | 1.126 | 0.05 |
| 4573 | G | 0.651 | 0.09 |
| 4574 | G | 0.366 | 0.13 |
| 4575 | G | 0     | 0.87 |
| 4576 | G | 0.014 | 0.92 |
| 4577 | A | 0.163 | 0.96 |
| 4578 | G | 0     | 0.98 |
| 4579 | G | 0.38  | 0.98 |
| 4580 | A | 0.556 | 0.97 |
| 4581 | A | 0.732 | 0.97 |
| 4582 | U | 0.692 | 0.89 |
| 4583 | A | 0.746 | 0.2  |
| 4584 | G | 0.529 | 0.38 |
| 4585 | G | 0.38  | 0.6  |
| 4586 | G | 0.665 | 0.61 |
| 4587 | G | 0.543 | 0.38 |
| 4588 | A | 0.963 | 0.15 |
| 4589 | U | 0.38  | 0.37 |
| 4590 | A | 0.746 | 0.29 |
| 4591 | U | 0.353 | 0.41 |
| 4592 | G | 0.814 | 0.28 |
| 4593 | A | 0.556 | 0.04 |
| 4594 | C | 0.231 | 0.35 |
| 4595 | U | 0.258 | 0.5  |
| 4596 | C | 0.081 | 0.55 |
| 4597 | C | 0.081 | 0.43 |
| 4598 | A | 0.61  | 0.13 |

|      |   |       |      |
|------|---|-------|------|
| 4599 | G | 0.868 | 0.08 |
| 4600 | C | 0.054 | 0.26 |
| 4601 | A | 1.031 | 0.31 |
| 4602 | G | 0.841 | 0.16 |
| 4603 | A | 0.922 | 0.1  |
| 4604 | A | 0.814 | 0.03 |
| 4605 | A | 1.058 | 0.05 |
| 4606 | G | 0.665 | 0.23 |
| 4607 | A | 0.705 | 0.32 |
| 4608 | U | 0.231 | 0.4  |
| 4609 | U | 0.855 | 0.48 |
| 4610 | A | 1.017 | 0.26 |
| 4611 | A | 1.017 | 0.24 |
| 4612 | U | 0.475 | 0.56 |
| 4613 | U | 1.112 | 0.4  |
| 4614 | A | 1.411 | 0.08 |
| 4615 | A | 1.099 | 0.06 |
| 4616 | C | 0.678 | 0.07 |
| 4617 | A | 1.465 | 0.22 |
| 4618 | U | 0.705 | 0.78 |
| 4619 | G | 0.475 | 0.75 |
| 4620 | A | 0.448 | 0.37 |
| 4621 | U | 0.163 | 0.41 |
| 4622 | C | 0.054 | 0.23 |
| 4623 | A | 0.095 | 0.12 |
| 4624 | C | 0.081 | 0.18 |
| 4625 | U | 0.244 | 0.15 |
| 4626 | A | 0.339 | 0.06 |
| 4627 | C | 0.203 | 0.3  |
| 4628 | A | 1.356 | 0.3  |
| 4629 | G | 1.248 | 0.13 |
| 4630 | A | 1.112 | 0.09 |
| 4631 | A | 0.76  | 0.03 |
| 4632 | C | 0.19  | 0.19 |
| 4633 | A | 0.895 | 0.19 |
| 4634 | A | 1.072 | 0.04 |
| 4635 | G | 1.465 | 0.14 |
| 4636 | A | 0.977 | 0.12 |
| 4637 | G | 0.841 | 0.14 |
| 4638 | A | 0.963 | 0.4  |
| 4639 | U | 0.705 | 0.57 |
| 4640 | A | 0.705 | 0.3  |
| 4641 | C | 0.068 | 0.17 |

|      |   |       |      |
|------|---|-------|------|
| 4642 | A | 0.692 | 0.14 |
| 4643 | A | 0.76  | 0.77 |
| 4644 | U | 0.61  | 0.97 |
| 4645 | U | 0.624 | 1    |
| 4646 | U | 0.461 | 0.99 |
| 4647 | C | 0.19  | 0.99 |
| 4648 | A | 0.556 | 0.98 |
| 4649 | A | 0.42  | 0.98 |
| 4650 | C | 0.353 | 0.89 |
| 4651 | A | 0.529 | 0.02 |
| 4652 | A | 0.8   | 0.02 |
| 4653 | U | 1.533 | 0.01 |
| 4654 | C | 0.041 | 0.01 |
| 4655 | A | 1.329 | 0.01 |
| 4656 | A | 0.773 | 0.07 |
| 4657 | A | 1.153 | 0.9  |
| 4658 | A | 0.977 | 0.94 |
| 4659 | A | 0.76  | 0.95 |
| 4660 | A | 0.434 | 0.96 |
| 4661 | C | 0.081 | 0.99 |
| 4662 | U | 0     | 0.99 |
| 4663 | C | 0.109 | 0.96 |
| 4664 | A | 0.8   | 0.92 |
| 4665 | A | 0.773 | 0.86 |
| 4666 | A | 0.787 | 0.96 |
| 4667 | A | 0.597 | 1    |
| 4668 | U | 0.326 | 0.99 |
| 4669 | U | 0.936 | 0.85 |
| 4670 | U | 1.628 | 0    |
| 4671 | A | 1.438 | 0    |
| 4672 | A | 1.004 | 0    |
| 4673 | A | 1.112 | 0    |
| 4674 | A | 1.072 | 0.85 |
| 4675 | A | 0.678 | 0.99 |
| 4676 | U | 0.326 | 1    |
| 4677 | U | 0.57  | 0.99 |
| 4678 | U | 0.57  | 0.96 |
| 4679 | U | 0.8   | 0.9  |
| 4680 | C | 0.203 | 0.92 |
| 4681 | G | 0.244 | 0.92 |
| 4682 | G | 0.109 | 0.95 |
| 4683 | G | 0.041 | 0.95 |
| 4684 | U | 0.014 | 0.97 |

|      |   |       |      |
|------|---|-------|------|
| 4685 | C | 0.027 | 0.97 |
| 4686 | U | 0.637 | 0.55 |
| 4687 | A | 0.719 | 0.11 |
| 4688 | U | 0.678 | 0.78 |
| 4689 | U | 0.583 | 0.84 |
| 4690 | A | 0.38  | 0.39 |
| 4691 | C | 0     | 0.58 |
| 4692 | A | 0.258 | 0.39 |
| 4693 | G | 0.339 | 0.15 |
| 4694 | A | 0.407 | 0.18 |
| 4695 | G | 0.583 | 0.18 |
| 4696 | A | 0.678 | 0.21 |
| 4697 | A | 0.76  | 0.28 |
| 4698 | G | 0.298 | 0.18 |
| 4699 | G | 0.095 | 0.11 |
| 4700 | C | 0     | 0.34 |
| 4701 | A | 0.543 | 0.47 |
| 4702 | G | 0.746 | 0.31 |
| 4703 | A | 0.909 | 0.36 |
| 4704 | G | 0.271 | 0.34 |
| 4705 | A | 1.397 | 0.05 |
| 4706 | U | 0.163 | 0.15 |
| 4707 | C | 0.109 | 0.19 |
| 4708 | A | 0.393 | 0.1  |
| 4709 | A | 0.543 | 0.02 |
| 4710 | C | 0.203 | 0.75 |
| 4711 | U | 0.217 | 0.76 |
| 4712 | G | 0.244 | 0.21 |
| 4713 | U | 0.109 | 0.73 |
| 4714 | G | 0.597 | 0.75 |
| 4715 | G | 0.705 | 0.47 |
| 4716 | A | 0.665 | 0.62 |
| 4717 | A | 0.448 | 0.63 |
| 4718 | G | 0.922 | 0.4  |
| 4719 | G | 0.217 | 0.45 |
| 4720 | G | 0.244 | 0.79 |
| 4721 | A | 0.176 | 0.86 |
| 4722 | C | 0.109 | 0.95 |
| 4723 | C | 0     | 0.95 |
| 4724 | C | 0     | 0.89 |
| 4725 | G | 0.163 | 0.89 |
| 4726 | G | 0.543 | 0.82 |
| 4727 | U | 0.149 | 0.29 |

|      |   |       |      |
|------|---|-------|------|
| 4728 | G | 0.407 | 0.31 |
| 4729 | A | 0     | 0.45 |
| 4730 | G | 0.203 | 0.36 |
| 4731 | C | 0.203 | 0.49 |
| 4732 | U | 0.109 | 0.53 |
| 4733 | A | 0.326 | 0.4  |
| 4734 | U | 0.244 | 0.69 |
| 4735 | U | 0.298 | 0.78 |
| 4736 | G | 0.624 | 0.63 |
| 4737 | U | 0.149 | 0.47 |
| 4738 | G | 0.434 | 0.42 |
| 4739 | G | 0.61  | 0.1  |
| 4740 | A | 0.637 | 0.04 |
| 4741 | A | 0.746 | 0.01 |
| 4742 | A | 0.827 | 0.04 |
| 4743 | G | 0.407 | 0.04 |
| 4744 | G | 0.258 | 0.01 |
| 4745 | G | 0.231 | 0.01 |
| 4746 | G | 0.122 | 0.06 |
| 4747 | A | 0.922 | 0.11 |
| 4748 | A | 0.678 | 0.72 |
| 4749 | G | 0.42  | 0.73 |
| 4750 | G | 0.448 | 0.83 |
| 4751 | A | 0.434 | 0.75 |
| 4752 | G | 0.271 | 0.01 |
| 4753 | C | 0     | 0.01 |
| 4754 | A | 0.38  | 0.01 |
| 4755 | G | 0.285 | 0.02 |
| 4756 | U | 0.054 | 0.83 |
| 4757 | C | 0.312 | 0.9  |
| 4758 | A | 0.732 | 0.74 |
| 4759 | U | 0.122 | 0.71 |
| 4760 | C | 0.19  | 0.03 |
| 4761 | U | 0.502 | 0.01 |
| 4762 | U | 0.787 | 0.05 |
| 4763 | A | 0.773 | 0.04 |
| 4764 | A | 1.044 | 0.01 |
| 4765 | A | 0.949 | 0.01 |
| 4766 | G | 0.461 | 0.86 |
| 4767 | G | 0.19  | 0.94 |
| 4768 | U | 0.19  | 0.94 |
| 4769 | A | 0.678 | 0.8  |
| 4770 | G | 0.122 | 0.02 |

|      |   |       |          |
|------|---|-------|----------|
| 4771 | G | 0.42  | 0.02     |
| 4772 | G | 0.312 | 0.01     |
| 4773 | A | 0.42  | 0.06     |
| 4774 | C | 0.122 | 0.06     |
| 4775 | A | 0.583 | 0.01     |
| 4776 | G | 0.8   | 0.01     |
| 4777 | A | 0.529 | 0.02     |
| 4778 | C | 0.407 | 0.11     |
| 4779 | A | 1.044 | 0.39     |
| 4780 | U | 0.543 | 0.38     |
| 4781 | U | 1.316 | 0.02     |
| 4782 | A | 1.438 | 0        |
| 4783 | A | 0.936 | 0        |
| 4784 | G | 0.61  | 0.01     |
| 4785 | G | 0.543 | 0.3      |
| 4786 | U | 0.895 | 0.34     |
| 4787 | A | 0.773 | 0.14     |
| 4788 | G | 0.475 | 0.15     |
| 4789 | U | 0.448 | 0.91     |
| 4790 | A | 0.109 | 0.93     |
| 4791 | C | 0.203 | 0.94     |
| 4792 | C | 0.122 | 0.88     |
| 4793 | C | 0     | 0.01     |
| 4794 | A | 0.556 | 0.02     |
| 4795 | G | 0.658 | 0.01     |
| 4796 | A | 1.343 | 0        |
| 4797 | A | 1.953 | 0        |
| 4798 | G | 0.258 | 0        |
| 4799 | A | 1.126 | 0        |
| 4800 | A | 1.255 | 0        |
| 4801 | A | 1.051 | 0        |
| 4802 | G | 0.305 | 8.37E-05 |
| 4803 | G | 0.142 | 0        |
| 4804 | C | 0.922 | 0        |
| 4805 | U | 0.237 | 0        |
| 4806 | A | 1.445 | 0        |
| 4807 | A | 1.072 | 6.30E-05 |
| 4808 | A | 0.712 | 4.83E-05 |
| 4809 | A | 0.624 | 0        |
| 4810 | U | 0.38  | 0        |
| 4811 | U | 1.974 | 0        |
| 4812 | A | 0.861 | 0        |
| 4813 | U | 1.255 | 0        |



|      |   |       |      |
|------|---|-------|------|
| 4814 | C | 0.529 | 0    |
| 4815 | A | 0.719 | 0    |
| 4816 | A | 0.773 | 0    |
| 4817 | A | 0.814 | 0    |
| 4818 | G | 0.515 | 0.01 |
| 4819 | A | 0.57  | 0.34 |
| 4820 | U | 0.312 | 0.8  |
| 4821 | U | 2.998 | 0.95 |
| 4822 | A | 1.451 | 0.92 |
| 4823 | U | 0.19  | 0.89 |
| 4824 | G | 0.095 | 0.01 |
| 4825 | G | 0.42  | 0.01 |
| 4826 | A | 0.393 | 0.09 |
| 4827 | G | 0.027 | 0.09 |
| 4828 | G | 0.597 | 0.01 |
| 4829 | A | 0.543 | 0.02 |
| 4830 | G | 0.434 | 0.05 |
| 4831 | G | 0.244 | 0.06 |
| 4832 | A | 0.692 | 0.51 |
| 4833 | A | 0.814 | 0.5  |
| 4834 | A | 0.692 | 0.01 |
| 4835 | A | 0.827 | 0.01 |
| 4836 | G | 0.665 | 0.01 |
| 4837 | A | 0.529 | 0    |
| 4838 | G | 0.014 | 0    |
| 4839 | G | 0.258 | 0.67 |
| 4840 | U | 0.217 | 0.67 |
| 4841 | G | 0.149 | 0.01 |
| 4842 | G | 0.217 | 0.01 |
| 4843 | A | 0.651 | 0.89 |
| 4844 | U | 1.56  | 0.93 |
| 4845 | A | 1.085 | 0.67 |
| 4846 | G | 0.176 | 0.45 |
| 4847 | C | 0.556 | 0.01 |
| 4848 | A | 0.448 | 0.28 |
| 4849 | G | 0.041 | 0.37 |
| 4850 | U | 0.109 | 0.45 |
| 4851 | U | 0.163 | 0.09 |
| 4852 | C | 0.068 | 0.08 |
| 4853 | C | 0.027 | 0.16 |
| 4854 | C | 0.109 | 0.12 |
| 4855 | A | 0.339 | 0.14 |
| 4856 | C | 0.515 | 0.25 |

|      |   |       |      |
|------|---|-------|------|
| 4857 | A | 0.285 | 0.25 |
| 4858 | U | 0.149 | 0.89 |
| 4859 | G | 0.095 | 1    |
| 4860 | G | 0.149 | 0.88 |
| 4861 | A | 0.339 | 0.05 |
| 4862 | G | 0.014 | 0    |
| 4863 | G | 0.068 | 0    |
| 4864 | A | 0.312 | 0    |
| 4865 | U | 0.624 | 0.02 |
| 4866 | A | 0.42  | 0.06 |
| 4867 | C | 0.109 | 0.89 |
| 4868 | C | 0.298 | 0.98 |
| 4869 | G | 0.42  | 0.87 |
| 4870 | G | 0.827 | 0.29 |
| 4871 | A | 0.732 | 0.28 |
| 4872 | G | 0.054 | 0.09 |
| 4873 | A | 0.149 | 0.13 |
| 4874 | G | 0.054 | 0.06 |
| 4875 | G | 0.041 | 0.06 |
| 4876 | C | 0.027 | 0.1  |
| 4877 | U | 0.38  | 0.26 |
| 4878 | A | 0.366 | 0.18 |
| 4879 | G | 0.475 | 0.14 |
| 4880 | A | 0.8   | 0.03 |
| 4881 | G | 0.827 | 0.01 |
| 4882 | A | 0.692 | 0.07 |
| 4883 | G | 0.217 | 0.08 |
| 4884 | G | 0.244 | 0.02 |
| 4885 | U | 0.448 | 0.27 |
| 4886 | G | 0.298 | 0.87 |
| 4887 | G | 0     | 0.76 |
| 4888 | C | 0.136 | 0.05 |
| 4889 | A | 0.692 | 0.11 |
| 4890 | U | 0.095 | 0.09 |
| 4891 | A | 0.231 | 0.04 |
| 4892 | G | 0.014 | 0.02 |
| 4893 | C | 0     | 0.7  |
| 4894 | C | 0.027 | 0.79 |
| 4895 | U | 0.054 | 0.2  |
| 4896 | C | 0     | 0.09 |
| 4897 | A | 1.438 | 0.09 |
| 4898 | U | 0.841 | 0.13 |
| 4899 | A | 0.855 | 0.16 |

|      |   |       |      |
|------|---|-------|------|
| 4900 | A | 0.543 | 0.15 |
| 4901 | A | 0.488 | 0.02 |
| 4902 | A | 0.488 | 0.01 |
| 4903 | U | 0.895 | 0.02 |
| 4904 | A | 0.353 | 0.01 |
| 4905 | U | 0.176 | 0    |
| 4906 | C | 0.176 | 0.02 |
| 4907 | U | 0.298 | 0.03 |
| 4908 | G | 0.624 | 0.01 |
| 4909 | A | 0.543 | 0    |
| 4910 | A | 0.488 | 0.01 |
| 4911 | A | 0.678 | 0.01 |
| 4912 | U | 1.017 | 0.22 |
| 4913 | A | 1.899 | 0.22 |
| 4914 | U | 0.597 | 0.02 |
| 4915 | A | 0.936 | 0.03 |
| 4916 | A | 0.705 | 0.03 |
| 4917 | A | 0.787 | 0.39 |
| 4918 | A | 0.556 | 0.44 |
| 4919 | C | 0.543 | 0.14 |
| 4920 | U | 1.777 | 0.12 |
| 4921 | A | 0.963 | 0.08 |
| 4922 | A | 1.316 | 0.03 |
| 4923 | A | 0.949 | 0.03 |
| 4924 | G | 0.597 | 0.08 |
| 4925 | A | 0.57  | 0.07 |
| 4926 | U | 0.068 | 0.05 |
| 4927 | C | 0.122 | 0.45 |
| 4928 | U | 0.461 | 0.64 |
| 4929 | A | 0.746 | 0.22 |
| 4930 | C | 0.665 | 0.01 |
| 4931 | A | 1.031 | 0.01 |
| 4932 | A | 0.651 | 0.01 |
| 4933 | A | 1.112 | 0.02 |
| 4934 | A | 0.895 | 0.02 |
| 4935 | G | 0.597 | 0.02 |
| 4936 | G | 0.027 | 0.03 |
| 4937 | U | 0.163 | 0.03 |
| 4938 | U | 0.271 | 0.02 |
| 4939 | U | 0.285 | 0.02 |
| 4940 | G | 0.163 | 0.08 |
| 4941 | C | 0.054 | 0.56 |
| 4942 | U | 0.407 | 0.68 |

|      |   |       |      |
|------|---|-------|------|
| 4943 | A | 0.76  | 0.66 |
| 4944 | U | 0.393 | 0.84 |
| 4945 | G | 0.61  | 0.82 |
| 4946 | U | 0.231 | 0.27 |
| 4947 | G | 0.203 | 0.11 |
| 4948 | C | 0.109 | 0.14 |
| 4949 | C | 0.027 | 0.43 |
| 4950 | C | 0.081 | 0.44 |
| 4951 | C | 0.298 | 0.73 |
| 4952 | A | 0.515 | 0.74 |
| 4953 | U | 0.38  | 0.45 |
| 4954 | U | 0.475 | 0.48 |
| 4955 | U | 1.099 | 0.31 |
| 4956 | U | 1.736 | 0.24 |
| 4957 | A | 1.343 | 0.23 |
| 4958 | A | 1.017 | 0.14 |
| 4959 | G | 0.366 | 0.19 |
| 4960 | G | 0.298 | 0.19 |
| 4961 | U | 0.339 | 0.25 |
| 4962 | C | 0.339 | 0.3  |
| 4963 | G | 0.678 | 0.31 |
| 4964 | G | 0.76  | 0.44 |
| 4965 | A | 0.353 | 0.46 |
| 4966 | U | 0.203 | 0.67 |
| 4967 | G | 0.041 | 0.8  |
| 4968 | G | 0.014 | 0.81 |
| 4969 | G | 0     | 0.73 |
| 4970 | C | 0.136 | 0.51 |
| 4971 | A | 1.546 | 0.55 |
| 4972 | U | 0.868 | 0.68 |
| 4973 | G | 0.366 | 0.73 |
| 4974 | G | 0.298 | 0.8  |
| 4975 | U | 0.407 | 0.78 |
| 4976 | G | 0     | 0.81 |
| 4977 | G | 0     | 0.81 |
| 4978 | A | 0     | 0.8  |
| 4979 | C | 0.014 | 0.85 |
| 4980 | C | 0     | 0.76 |
| 4981 | U | 0.027 | 0.94 |
| 4982 | G | 0.095 | 0.96 |
| 4983 | C | 0.081 | 0.97 |
| 4984 | A | 0.095 | 0.92 |
| 4985 | G | 0.027 | 0.91 |

|      |   |       |      |
|------|---|-------|------|
| 4986 | C | 0.054 | 0.92 |
| 4987 | A | 0.339 | 0.91 |
| 4988 | G | 0.61  | 0.9  |
| 4989 | A | 0.448 | 0.66 |
| 4990 | G | 0.502 | 0.72 |
| 4991 | U | 1.275 | 0.74 |
| 4992 | A | 0.922 | 0.88 |
| 4993 | A | 1.004 | 0.89 |
| 4994 | U | 0.353 | 0.88 |
| 4995 | C | 0     | 0.82 |
| 4996 | U | 0.054 | 0.58 |
| 4997 | U | 0.054 | 0.65 |
| 4998 | C | 0.027 | 0.44 |
| 4999 | C | 0.027 | 0.14 |
| 5000 | C | 0.176 | 0.12 |
| 5001 | A | 0.393 | 0.24 |
| 5002 | C | 0.326 | 0.56 |
| 5003 | U | 1.166 | 0.56 |
| 5004 | A | 0.963 | 0.11 |
| 5005 | C | 0.719 | 0.08 |
| 5006 | A | 0.705 | 0.06 |
| 5007 | G | 0.339 | 0.15 |
| 5008 | G | 0.38  | 0.4  |
| 5009 | A | 0.529 | 0.38 |
| 5010 | A | 0.502 | 0.59 |
| 5011 | G | 0.353 | 0.55 |
| 5012 | G | 0.529 | 0.5  |
| 5013 | A | 0.543 | 0.35 |
| 5014 | A | 0.515 | 0.07 |
| 5015 | G | 0.163 | 0.34 |
| 5016 | C | 0.095 | 0.41 |
| 5017 | C | 0.448 | 0.51 |
| 5018 | A | 0.42  | 0.52 |
| 5019 | U | 0.298 | 0.77 |
| 5020 | U | 0.543 | 0.87 |
| 5021 | U | 1.085 | 0.76 |
| 5022 | A | 1.533 | 0.55 |
| 5023 | G | 1.024 | 0.66 |
| 5024 | A | 0.861 | 0.61 |
| 5025 | A | 0.482 | 0.81 |
| 5026 | G | 0.339 | 0.58 |
| 5027 | U | 0.651 | 0.48 |
| 5028 | A | 0.699 | 0.11 |

|      |   |       |      |
|------|---|-------|------|
| 5029 | C | 0.271 | 0.2  |
| 5030 | A | 0.882 | 0.2  |
| 5031 | A | 0.556 | 0.64 |
| 5032 | G | 0.244 | 0.65 |
| 5033 | G | 0.203 | 0.64 |
| 5034 | G | 0.298 | 0.23 |
| 5035 | U | 0.298 | 0.41 |
| 5036 | A | 0.298 | 0.45 |
| 5037 | U | 0.17  | 0.6  |
| 5038 | U | 0.393 | 0.67 |
| 5039 | G | 0.61  | 0.48 |
| 5040 | G | 0.129 | 0.38 |
| 5041 | C | 0.102 | 0.11 |
| 5042 | A | 0.244 | 0.08 |
| 5043 | U | 0.231 | 0.06 |
| 5044 | U | 0.692 | 0.69 |
| 5045 | U | 0.529 | 0.69 |
| 5046 | G | 0.495 | 0.04 |
| 5047 | A | 0.583 | 0.02 |
| 5048 | C | 0.231 | 0.02 |
| 5049 | A | 0.312 | 0.01 |
| 5050 | C | 0.109 | 0.37 |
| 5051 | C | 0.264 | 0.38 |
| 5052 | A | 0.949 | 0.26 |
| 5053 | G | 1.017 | 0.1  |
| 5054 | A | 1.241 | 0.04 |
| 5055 | A | 1.275 | 0.06 |
| 5056 | A | 0.875 | 0.53 |
| 5057 | A | 1.065 | 0.51 |
| 5058 | A | 0.963 | 0.09 |
| 5059 | G | 1.119 | 0.2  |
| 5060 | G | 0.19  | 0.34 |
| 5061 | G | 0.312 | 0.57 |
| 5062 | U | 0.075 | 0.68 |
| 5063 | G | 0.373 | 0.35 |
| 5064 | G | 0.231 | 0.65 |
| 5065 | C | 0.007 | 0.71 |
| 5066 | U | 0.42  | 0.63 |
| 5067 | C | 0.278 | 0.24 |
| 5068 | A | 0.407 | 0.24 |
| 5069 | G | 0.482 | 0.09 |
| 5070 | U | 0.719 | 0.14 |
| 5071 | A | 0.38  | 0.22 |

|      |   |       |      |
|------|---|-------|------|
| 5072 | C | 0.109 | 0.15 |
| 5073 | U | 0.461 | 0.37 |
| 5074 | U | 0.827 | 0.44 |
| 5075 | A | 1.044 | 0.45 |
| 5076 | U | 0.366 | 0.74 |
| 5077 | G | 0.475 | 0.77 |
| 5078 | C | 0.468 | 0.69 |
| 5079 | A | 0.4   | 0.5  |
| 5080 | G | 0.509 | 0.6  |
| 5081 | U | 0.298 | 0.75 |
| 5082 | G | 0.671 | 0.41 |
| 5083 | A | 0.76  | 0.15 |
| 5084 | G | 1.166 | 0.14 |
| 5085 | G | 0.353 | 0.02 |
| 5086 | A | 0.556 | 0.03 |
| 5087 | U | 0.787 | 0.26 |
| 5088 | A | 1.411 | 0.25 |
| 5089 | A | 0.543 | 0.36 |
| 5090 | C | 0.176 | 0.5  |
| 5091 | C | 0     | 0.55 |
| 5092 | U | 0.095 | 0.34 |
| 5093 | G | 0.42  | 0.31 |
| 5094 | G | 0.366 | 0.76 |
| 5095 | U | 0.366 | 0.83 |
| 5096 | A | 0.054 | 0.81 |
| 5097 | C | 0.19  | 0.59 |
| 5098 | U | 0.678 | 0.22 |
| 5099 | C | 0.678 | 0.24 |
| 5100 | A | 1.302 | 0.32 |
| 5101 | A | 0.827 | 0.5  |
| 5102 | A | 1.221 | 0.5  |
| 5103 | G | 0.705 | 0.08 |
| 5104 | A | 0.814 | 0.28 |
| 5105 | A | 0.57  | 0.67 |
| 5106 | C | 0.163 | 0.61 |
| 5107 | U | 0.298 | 0.65 |
| 5108 | U | 0.543 | 0.94 |
| 5109 | U | 0.448 | 0.92 |
| 5110 | U | 0.597 | 0.85 |
| 5111 | G | 0.583 | 0.34 |
| 5112 | G | 0.461 | 0.14 |
| 5113 | A | 0.732 | 0.17 |
| 5114 | C | 0.231 | 0.16 |

|      |   |       |      |
|------|---|-------|------|
| 5115 | A | 0.841 | 0.47 |
| 5116 | G | 0.57  | 0.59 |
| 5117 | A | 1.085 | 0.6  |
| 5118 | U | 0.461 | 0.78 |
| 5119 | G | 0.597 | 0.89 |
| 5120 | U | 0.515 | 0.68 |
| 5121 | A | 1.316 | 0.44 |
| 5122 | A | 0.936 | 0.11 |
| 5123 | C | 0.461 | 0.09 |
| 5124 | A | 1.112 | 0.05 |
| 5125 | C | 0.353 | 0.12 |
| 5126 | C | 0.461 | 0.51 |
| 5127 | A | 1.004 | 0.57 |
| 5128 | A | 1.424 | 0.21 |
| 5129 | A | 1.18  | 0.11 |
| 5130 | C | 0.19  | 0.1  |
| 5131 | U | 0.217 | 0.15 |
| 5132 | A | 0.353 | 0.13 |
| 5133 | U | 0.326 | 0.45 |
| 5134 | G | 0.014 | 0.54 |
| 5135 | C | 0.339 | 0.32 |
| 5136 | A | 0.285 | 0.45 |
| 5137 | G | 0     | 0.35 |
| 5138 | A | 1.044 | 0.2  |
| 5139 | C | 0.543 | 0.14 |
| 5140 | A | 1.628 | 0.66 |
| 5141 | U | 0.882 | 0.65 |
| 5142 | U | 0.719 | 0.13 |
| 5143 | U | 1.18  | 0.23 |
| 5144 | U | 1.18  | 0.34 |
| 5145 | A | 1.533 | 0.28 |
| 5146 | C | 0.027 | 0.79 |
| 5147 | U | 0.38  | 0.79 |
| 5148 | G | 0.285 | 0.25 |
| 5149 | C | 0.312 | 0.25 |
| 5150 | A | 0.122 | 0.26 |
| 5151 | U | 0     | 0.2  |
| 5152 | A | 0.054 | 0.26 |
| 5153 | G | 0.068 | 0.24 |
| 5154 | C | 0.434 | 0.05 |
| 5155 | A | 0.868 | 0.98 |
| 5156 | C | 0.298 | 0.98 |
| 5157 | U | 0.217 | 0.91 |



|      |   |       |      |
|------|---|-------|------|
| 5158 | U | 0.556 | 0.52 |
| 5159 | A | 1.316 | 0.06 |
| 5160 | U | 0.732 | 0.62 |
| 5161 | U | 0.407 | 0.91 |
| 5162 | U | 0.19  | 0.94 |
| 5163 | C | 0.109 | 0.91 |
| 5164 | C | 0.231 | 0.87 |
| 5165 | C | 0.109 | 0.92 |
| 5166 | U | 0.407 | 0.96 |
| 5167 | U | 0.746 | 0.97 |
| 5168 | G | 0.814 | 0.95 |
| 5169 | C | 0.543 | 0.97 |
| 5170 | U | 1.017 | 0.97 |
| 5171 | U | 1.356 | 0.92 |
| 5172 | U | 1.424 | 0.57 |
| 5173 | A | 1.058 | 0.53 |
| 5174 | C | 0.353 | 0.27 |
| 5175 | A | 0.502 | 0.11 |
| 5176 | G | 0.434 | 0.02 |
| 5177 | C | 0.42  | 0.02 |
| 5178 | G | 0.176 | 0.01 |
| 5179 | G | 0.312 | 0    |
| 5180 | G | 0.407 | 0.16 |
| 5181 | A | 0.637 | 0.59 |
| 5182 | G | 0.705 | 0.61 |
| 5183 | A | 0.461 | 0.89 |
| 5184 | A | 0.732 | 0.94 |
| 5185 | G | 0.488 | 0.96 |
| 5186 | U | 0.339 | 0.94 |
| 5187 | G | 0.855 | 0.94 |
| 5188 | A | 1.112 | 0.91 |
| 5189 | G | 1.072 | 0.71 |
| 5190 | A | 1.682 | 0.34 |
| 5191 | A | 2.007 | 0.16 |
| 5192 | G | 0.692 | 0.63 |
| 5193 | G | 0.014 | 0.63 |
| 5194 | G | 0.014 | 0.08 |
| 5195 | C | 0.217 | 0.2  |
| 5196 | C | 0.57  | 0.21 |
| 5197 | A | 0.787 | 0.04 |
| 5198 | U | 0.719 | 0.66 |
| 5199 | C | 1.031 | 0.64 |
| 5200 | A | 1.926 | 0.07 |

|      |   |       |      |
|------|---|-------|------|
| 5201 | G | 0.773 | 0.07 |
| 5202 | G | 0.448 | 0.07 |
| 5203 | G | 0.163 | 0.27 |
| 5204 | G | 0.624 | 0.65 |
| 5205 | A | 0.76  | 0.72 |
| 5206 | G | 0.949 | 0.77 |
| 5207 | A | 1.139 | 0.85 |
| 5208 | A | 1.112 | 0.73 |
| 5209 | C | 0.773 | 0.89 |
| 5210 | A | 1.79  | 0.91 |
| 5211 | A | 1.031 | 0.97 |
| 5212 | C | 0.407 | 0.98 |
| 5213 | U | 0.488 | 0.68 |
| 5214 | G | 0.732 | 0.78 |
| 5215 | C | 0.217 | 0.84 |
| 5216 | U | 0.407 | 0.89 |
| 5217 | G | 1.289 | 0.76 |
| 5218 | U | 0.583 | 0.75 |
| 5219 | C | 0.407 | 0.67 |
| 5220 | U | 1.194 | 0.91 |
| 5221 | U | 1.234 | 0.94 |
| 5222 | G | 0.529 | 0.94 |
| 5223 | C | 0.298 | 0.92 |
| 5224 | U | 0.203 | 0.94 |
| 5225 | G | 0.122 | 0.95 |
| 5226 | C | 0.42  | 0.95 |
| 5227 | A | 0.339 | 0.92 |
| 5228 | G | 0.244 | 0.77 |
| 5229 | G | 0.203 | 0.43 |
| 5230 | U | 0.353 | 0.58 |
| 5231 | U | 0.271 | 0.52 |
| 5232 | C | 0.285 | 0.4  |
| 5233 | C | 0.163 | 0.52 |
| 5234 | C | 0.434 | 0.32 |
| 5235 | G | 2.414 | 0.18 |
| 5236 | A | 2.591 | 0.14 |
| 5237 | G | 1.709 | 0.12 |
| 5238 | A | 1.438 | 0.12 |
| 5239 | G | 0.109 | 0.28 |
| 5240 | C | 0.068 | 0.31 |
| 5241 | U | 0.298 | 0.3  |
| 5242 | C | 0     | 0.37 |
| 5243 | A | 0.895 | 0.37 |

|      |   |       |      |
|------|---|-------|------|
| 5244 | U | 0.99  | 0.28 |
| 5245 | A | 1.763 | 0.24 |
| 5246 | A | 0.8   | 0.21 |
| 5247 | G | 0.285 | 0.29 |
| 5248 | U | 0.393 | 0.28 |
| 5249 | A | 0.326 | 0.17 |
| 5250 | C | 0.393 | 0.24 |
| 5251 | C | 0.19  | 0.27 |
| 5252 | A | 0.271 | 0.64 |
| 5253 | G | 0.57  | 0.78 |
| 5254 | G | 0.488 | 0.64 |
| 5255 | U | 0     | 0.51 |
| 5256 | A | 1.153 | 0.53 |
| 5257 | C | 0.353 | 0.48 |
| 5258 | C | 0.651 | 0.5  |
| 5259 | A | 0.868 | 0.51 |
| 5260 | A | 0.99  | 0.46 |
| 5261 | G | 0.434 | 0.35 |
| 5262 | C | 0.448 | 0.75 |
| 5263 | C | 0.136 | 0.79 |
| 5264 | U | 0.475 | 0.64 |
| 5265 | A | 1.072 | 0.03 |
| 5266 | C | 0.882 | 0.14 |
| 5267 | A | 0.448 | 0.14 |
| 5268 | G | 0.502 | 0.1  |
| 5269 | U | 0.543 | 0.29 |
| 5270 | A | 0.61  | 0.27 |
| 5271 | C | 0.326 | 0.31 |
| 5272 | U | 0.529 | 0.39 |
| 5273 | U | 0.949 | 0.49 |
| 5274 | A | 1.248 | 0.49 |
| 5275 | G | 0.692 | 0.4  |
| 5276 | C | 0.271 | 0.58 |
| 5277 | A | 0.285 | 0.8  |
| 5278 | C | 0.014 | 0.81 |
| 5279 | U | 0.461 | 0.91 |
| 5280 | G | 1.072 | 0.76 |
| 5281 | A | 1.18  | 0.92 |
| 5282 | A | 1.261 | 0.9  |
| 5283 | A | 0.949 | 0.14 |
| 5284 | G | 0.719 | 0.1  |
| 5285 | U | 0.353 | 0.1  |
| 5286 | A | 0.529 | 0.04 |

|      |   |       |      |
|------|---|-------|------|
| 5287 | G | 0.773 | 0.3  |
| 5288 | U | 0.855 | 0.34 |
| 5289 | A | 1.261 | 0.3  |
| 5290 | A | 1.207 | 0.28 |
| 5291 | G | 1.126 | 0.01 |
| 5292 | C | 0.529 | 0    |
| 5293 | G | 0.949 | 0.01 |
| 5294 | A | 0.746 | 0.01 |
| 5295 | U | 0.326 | 0.04 |
| 5296 | G | 0.38  | 0.06 |
| 5297 | U | 0.366 | 0.05 |
| 5298 | C | 0.461 | 0.02 |
| 5299 | A | 0.705 | 0.01 |
| 5300 | G | 0.665 | 0.01 |
| 5301 | A | 0.475 | 0.8  |
| 5302 | U | 0.258 | 0.65 |
| 5303 | C | 0.041 | 0.57 |
| 5304 | C | 0.176 | 0.1  |
| 5305 | C | 0.217 | 0.06 |
| 5306 | A | 0.149 | 0.07 |
| 5307 | G | 0.665 | 0.06 |
| 5308 | G | 0.122 | 0.03 |
| 5309 | G | 0.339 | 0.04 |
| 5310 | A | 0.502 | 0.03 |
| 5311 | G | 0.963 | 0.02 |
| 5312 | A | 1.438 | 0.01 |
| 5313 | G | 0.895 | 0.02 |
| 5314 | A | 0.637 | 0.03 |
| 5315 | A | 0.705 | 0.6  |
| 5316 | U | 0.109 | 0.68 |
| 5317 | C | 0.014 | 0.17 |
| 5318 | C | 0.122 | 0.41 |
| 5319 | C | 0     | 0.4  |
| 5320 | A | 0.176 | 0.01 |
| 5321 | C | 0.217 | 0.09 |
| 5322 | C | 0.163 | 0.09 |
| 5323 | U | 0.271 | 0.09 |
| 5324 | G | 0.488 | 0.44 |
| 5325 | G | 0.692 | 0.47 |
| 5326 | A | 1.126 | 0.09 |
| 5327 | A | 0.326 | 0.12 |
| 5328 | A | 0.637 | 0.46 |
| 5329 | C | 0.583 | 0.46 |

|      |   |       |      |
|------|---|-------|------|
| 5330 | A | 0.556 | 0.06 |
| 5331 | G | 0.339 | 0.1  |
| 5332 | U | 0.217 | 0.1  |
| 5333 | G | 0.326 | 0.51 |
| 5334 | G | 0.529 | 0.5  |
| 5335 | A | 0.814 | 0.22 |
| 5336 | G | 0.556 | 0.31 |
| 5337 | A | 0.705 | 0.13 |
| 5338 | A | 0.637 | 0.16 |
| 5339 | G | 0.827 | 0.19 |
| 5340 | A | 0.719 | 0.13 |
| 5341 | G | 0.651 | 0.14 |
| 5342 | A | 0.651 | 0.05 |
| 5343 | C | 0.624 | 0.33 |
| 5344 | A | 0.936 | 0.34 |
| 5345 | A | 0.909 | 0.39 |
| 5346 | U | 1.004 | 0.45 |
| 5347 | A | 1.953 | 0.13 |
| 5348 | G | 0.821 | 0.62 |
| 5349 | G | 0.773 | 0.62 |
| 5350 | A | 0.793 | 0.6  |
| 5351 | G | 0.76  | 0.21 |
| 5352 | A | 0.902 | 0.04 |
| 5353 | G | 0.814 | 0.01 |
| 5354 | G | 0.651 | 0.02 |
| 5355 | C | 0.136 | 0.05 |
| 5356 | C | 0.142 | 0.24 |
| 5357 | U | 0.482 | 0.87 |
| 5358 | U | 3.269 | 0.95 |
| 5359 | C | 0.434 | 0.89 |
| 5360 | G | 0.319 | 0.07 |
| 5361 | A | 0.482 | 0.16 |
| 5362 | A | 0.902 | 0.89 |
| 5363 | U | 0.848 | 0.96 |
| 5364 | G | 0.122 | 0.52 |
| 5365 | G | 0.339 | 0.62 |
| 5366 | C | 0.075 | 0.6  |
| 5367 | U | 0.726 | 0.7  |
| 5368 | A | 0.78  | 0.21 |
| 5369 | A | 0.556 | 0.06 |
| 5370 | A | 0.515 | 0.03 |
| 5371 | C | 1.594 | 0.02 |
| 5372 | A | 0.943 | 0.27 |

|      |   |       |      |
|------|---|-------|------|
| 5373 | G | 1.139 | 0.33 |
| 5374 | A | 0.827 | 0.08 |
| 5375 | A | 0.475 | 0.03 |
| 5376 | C | 0.326 | 0.24 |
| 5377 | A | 0.312 | 0.31 |
| 5378 | G | 0.041 | 0.21 |
| 5379 | U | 1.492 | 0.31 |
| 5380 | A | 0.543 | 0.29 |
| 5381 | G | 0.353 | 0.16 |
| 5382 | A | 0.787 | 0.04 |
| 5383 | G | 0.637 | 0.03 |
| 5384 | G | 0.651 | 0.06 |
| 5385 | A | 0.515 | 0.04 |
| 5386 | G | 0.163 | 0.14 |
| 5387 | A | 1.655 | 0.73 |
| 5388 | U | 1.75  | 0.76 |
| 5389 | A | 1.072 | 0.09 |
| 5390 | A | 1.004 | 0.03 |
| 5391 | A | 0.963 | 0.08 |
| 5392 | C | 1.289 | 0.09 |
| 5393 | A | 0.814 | 0.14 |
| 5394 | G | 0.366 | 0.17 |
| 5395 | A | 0.624 | 0.12 |
| 5396 | G | 0.42  | 0.1  |
| 5397 | A | 1.153 | 0.05 |
| 5398 | G | 0.258 | 0.18 |
| 5399 | G | 0.231 | 0.22 |
| 5400 | C | 0.109 | 0.2  |
| 5401 | G | 0.109 | 0.02 |
| 5402 | G | 0.258 | 0.09 |
| 5403 | U | 0.515 | 0.09 |
| 5404 | A | 0.977 | 0.01 |
| 5405 | A | 0.922 | 0.03 |
| 5406 | A | 0.583 | 0.23 |
| 5407 | C | 0.054 | 0.23 |
| 5408 | C | 0.529 | 0    |
| 5409 | A | 0.855 | 0    |
| 5410 | C | 0.041 | 0.01 |
| 5411 | C | 0.19  | 0.48 |
| 5412 | U | 0.529 | 0.48 |
| 5413 | A | 0.597 | 0    |
| 5414 | C | 0.136 | 0    |
| 5415 | C | 0.705 | 0.01 |

|      |   |       |      |
|------|---|-------|------|
| 5416 | A | 0.488 | 0.01 |
| 5417 | A | 0.583 | 0.47 |
| 5418 | G | 0.298 | 0.47 |
| 5419 | G | 0.068 | 0.02 |
| 5420 | G | 0.556 | 0.01 |
| 5421 | A | 0.637 | 0    |
| 5422 | G | 0.326 | 0.01 |
| 5423 | C | 0.109 | 0.01 |
| 5424 | U | 1.017 | 0.01 |
| 5425 | A | 0.936 | 0    |
| 5426 | A | 0.42  | 0.07 |
| 5427 | U | 0.217 | 0.09 |
| 5428 | U | 0.353 | 0.93 |
| 5429 | U | 0.339 | 0.94 |
| 5430 | U | 0.312 | 0.97 |
| 5431 | C | 0.081 | 1    |
| 5432 | C | 0.176 | 1    |
| 5433 | A | 0.136 | 0.99 |
| 5434 | G | 0.19  | 0.93 |
| 5435 | G | 0.176 | 0.71 |
| 5436 | U | 0.271 | 0.03 |
| 5437 | U | 0.502 | 0.05 |
| 5438 | U | 0.448 | 0.06 |
| 5439 | G | 0.515 | 0.18 |
| 5440 | G | 0.271 | 0.28 |
| 5441 | C | 0.326 | 0.24 |
| 5442 | A | 0.855 | 0.01 |
| 5443 | A | 1.302 | 0.01 |
| 5444 | A | 0.814 | 0.05 |
| 5445 | G | 0.502 | 0.05 |
| 5446 | G | 0.149 | 0.26 |
| 5447 | U | 0.095 | 0.28 |
| 5448 | C | 0     | 0.89 |
| 5449 | U | 0.041 | 0.96 |
| 5450 | U | 0.149 | 0.99 |
| 5451 | G | 0.081 | 0.99 |
| 5452 | G | 0.068 | 0.99 |
| 5453 | G | 0.244 | 0.96 |
| 5454 | A | 0.488 | 0.93 |
| 5455 | A | 1.004 | 0.99 |
| 5456 | U | 0.882 | 0.09 |
| 5457 | A | 0.665 | 0.01 |
| 5458 | C | 0.136 | 0    |

|      |   |       |      |
|------|---|-------|------|
| 5459 | U | 0.19  | 0.77 |
| 5460 | G | 0.203 | 0.77 |
| 5461 | G | 0     | 0.71 |
| 5462 | C | 0.231 | 0.75 |
| 5463 | A | 0.217 | 0.74 |
| 5464 | U | 0.136 | 0.86 |
| 5465 | G | 0.326 | 0.3  |
| 5466 | A | 0.882 | 0.12 |
| 5467 | U | 0.76  | 0    |
| 5468 | G | 0.719 | 0    |
| 5469 | A | 0.692 | 0    |
| 5470 | A | 0.827 | 0.11 |
| 5471 | C | 0.529 | 0.29 |
| 5472 | A | 0.285 | 0.28 |
| 5473 | A | 0.475 | 0    |
| 5474 | G | 0.312 | 0    |
| 5475 | G | 0.176 | 0    |
| 5476 | G | 0.109 | 0    |
| 5477 | A | 0.909 | 0.56 |
| 5478 | U | 0.149 | 0.94 |
| 5479 | G | 0.027 | 0.96 |
| 5480 | U | 0.136 | 0.94 |
| 5481 | C | 0.19  | 0.99 |
| 5482 | A | 0.244 | 0.99 |
| 5483 | C | 0     | 0    |
| 5484 | C | 0.203 | 0.09 |
| 5485 | A | 0.244 | 0.94 |
| 5486 | A | 0.366 | 0.89 |
| 5487 | G | 0.19  | 0.45 |
| 5488 | C | 0     | 0.87 |
| 5489 | U | 0.488 | 0.93 |
| 5490 | A | 0.448 | 0.85 |
| 5491 | U | 0.068 | 0.21 |
| 5492 | G | 0.366 | 0.05 |
| 5493 | U | 0.678 | 0.04 |
| 5494 | A | 0.719 | 0.02 |
| 5495 | A | 0.326 | 0.04 |
| 5496 | A | 0.366 | 0.04 |
| 5497 | A | 0.434 | 0.24 |
| 5498 | U | 0.244 | 0.31 |
| 5499 | A | 0.285 | 0.23 |
| 5500 | C | 0.231 | 0.71 |
| 5501 | A | 0.312 | 0.75 |



|      |   |       |      |
|------|---|-------|------|
| 5502 | G | 0.258 | 0.67 |
| 5503 | A | 0.448 | 0.15 |
| 5504 | U | 0.732 | 0.44 |
| 5505 | A | 0.705 | 0.36 |
| 5506 | C | 0.203 | 0.3  |
| 5507 | U | 0.298 | 0.81 |
| 5508 | U | 0.271 | 0.85 |
| 5509 | G | 0.109 | 0.67 |
| 5510 | U | 0.163 | 0.64 |
| 5511 | G | 0.149 | 0.25 |
| 5512 | U | 0.081 | 0.01 |
| 5513 | U | 0.353 | 0.04 |
| 5514 | U | 0.977 | 0.05 |
| 5515 | A | 1.166 | 0.04 |
| 5516 | A | 0.977 | 0.04 |
| 5517 | U | 0.882 | 0.26 |
| 5518 | A | 0.475 | 0.65 |
| 5519 | C | 0.719 | 0.65 |
| 5520 | A | 0.773 | 0.63 |
| 5521 | A | 0.773 | 0.64 |
| 5522 | A | 0.8   | 0.25 |
| 5523 | A | 0.76  | 0.15 |
| 5524 | G | 0.407 | 0.12 |
| 5525 | G | 0.244 | 0.23 |
| 5526 | C | 0.054 | 0.26 |
| 5527 | U | 0.19  | 0.22 |
| 5528 | U | 0.475 | 0.28 |
| 5529 | U | 0.841 | 0.25 |
| 5530 | A | 0.827 | 0.2  |
| 5531 | U | 0.312 | 0.5  |
| 5532 | U | 0.353 | 0.39 |
| 5533 | U | 0.637 | 0.09 |
| 5534 | A | 1.031 | 0.02 |
| 5535 | U | 0.271 | 0.03 |
| 5536 | G | 0.258 | 0.05 |
| 5537 | C | 0.271 | 0.05 |
| 5538 | A | 0.583 | 0.07 |
| 5539 | U | 0.637 | 0.03 |
| 5540 | U | 0.529 | 0    |
| 5541 | G | 0.353 | 0    |
| 5542 | C | 0.298 | 0.01 |
| 5543 | A | 1.004 | 0.02 |
| 5544 | A | 1.424 | 0.02 |

|      |   |       |      |
|------|---|-------|------|
| 5545 | G | 0.176 | 0.06 |
| 5546 | A | 1.004 | 0.77 |
| 5547 | A | 0.963 | 0.77 |
| 5548 | A | 1.221 | 0.17 |
| 5549 | G | 0.76  | 0.17 |
| 5550 | G | 0.298 | 0.17 |
| 5551 | C | 0.041 | 0.03 |
| 5552 | U | 0.258 | 0.06 |
| 5553 | G | 0.692 | 0.33 |
| 5554 | U | 0.882 | 0.33 |
| 5555 | A | 1.275 | 0.02 |
| 5556 | G | 1.004 | 0    |
| 5557 | A | 0.502 | 0.02 |
| 5558 | U | 0.298 | 0.04 |
| 5559 | G | 0.095 | 0.38 |
| 5560 | U | 0.203 | 0.62 |
| 5561 | C | 0     | 0.9  |
| 5562 | U | 0.393 | 0.86 |
| 5563 | A | 0.651 | 0.21 |
| 5564 | G | 0.231 | 0.16 |
| 5565 | G | 0.231 | 0.18 |
| 5566 | G | 0.949 | 0.21 |
| 5567 | G | 0.543 | 0.21 |
| 5568 | A | 1.289 | 0.21 |
| 5569 | A | 1.519 | 0.13 |
| 5570 | G | 0.624 | 0.26 |
| 5571 | G | 0.651 | 0.21 |
| 5572 | A | 0.895 | 0.03 |
| 5573 | C | 1.18  | 0.29 |
| 5574 | A | 2.835 | 0.33 |
| 5575 | U | 1.153 | 0.91 |
| 5576 | G | 0     | 0.8  |
| 5577 | G | 0.054 | 0.76 |
| 5578 | G | 0     | 0.12 |
| 5579 | G | 0.136 | 0.25 |
| 5580 | C | 1.356 | 0.25 |
| 5581 | A | 0.109 | 0.09 |
| 5582 | G | 0     | 0.49 |
| 5583 | G | 0.014 | 0.59 |
| 5584 | G | 0.122 | 0.54 |
| 5585 | G | 0.271 | 0.77 |
| 5586 | G | 0.176 | 0.77 |
| 5587 | A | 0.841 | 0.55 |

|      |   |       |      |
|------|---|-------|------|
| 5588 | U | 2.482 | 0.21 |
| 5589 | G | 0.38  | 0.83 |
| 5590 | G | 0.203 | 0.8  |
| 5591 | A | 0.407 | 0.74 |
| 5592 | G | 1.411 | 0.64 |
| 5593 | A | 0.665 | 0.09 |
| 5594 | C | 3.242 | 0.16 |
| 5595 | C | 3.133 | 0.16 |
| 5596 | A | 3.513 | 0.47 |
| 5597 | G | 2.441 | 0.63 |
| 5598 | G | 0.651 | 0.62 |
| 5599 | A | 0     | 0.11 |
| 5600 | C | 0     | 0.05 |
| 5601 | C | 0.014 | 0.11 |
| 5602 | U | 0.136 | 0.15 |
| 5603 | C | 0.014 | 0.5  |
| 5604 | C | 0     | 0.54 |
| 5605 | U | 0.271 | 0.47 |
| 5606 | C | 0.041 | 0.35 |
| 5607 | C | 0.014 | 0.71 |
| 5608 | U | 0.041 | 0.76 |
| 5609 | C | 0.109 | 0.77 |
| 5610 | C | 0     | 0.74 |
| 5611 | U | 0.027 | 0.64 |
| 5612 | C | 0.014 | 0.74 |
| 5613 | C | 0.176 | 0.71 |
| 5614 | C | 0.38  | 0.6  |
| 5615 | C | 0.882 | 0.64 |
| 5616 | C | 0.326 | 0.56 |
| 5617 | U | 0.827 | 0.25 |
| 5618 | C | 0.949 | 0.76 |
| 5619 | C | 1.031 | 0.84 |
| 5620 | A | 1.058 | 0.9  |
| 5621 | G | 0.604 | 0.46 |
| 5622 | G | 0.42  | 0.43 |
| 5623 | A | 0.624 | 0.16 |
| 5624 | C | 1.044 | 0.26 |
| 5625 | U | 0.014 | 0.25 |
| 5626 | A | 0.163 | 0.02 |
| 5627 | G | 0.203 | 0.02 |
| 5628 | C | 0.529 | 0.09 |
| 5629 | A | 0.359 | 0.97 |
| 5630 | U | 0.393 | 0.97 |

|      |   |       |      |
|------|---|-------|------|
| 5631 | A | 0.312 | 0.02 |
| 5632 | A | 0.732 | 0    |
| 5633 | A | 0.434 | 0    |
| 5634 | U | 0.014 | 0    |
| 5635 | G | 0.827 | 0    |
| 5636 | G | 0.665 | 0    |
| 5637 | A | 0.529 | 0.02 |
| 5638 | A | 0.366 | 0.94 |
| 5639 | G | 0.76  | 0.94 |
| 5640 | A | 0.543 | 0.08 |
| 5641 | A | 1.221 | 0.02 |
| 5642 | A | 0.882 | 0.02 |
| 5643 | G | 0.475 | 0.04 |
| 5644 | A | 0.068 | 0.03 |
| 5645 | C | 0.136 | 0.01 |
| 5646 | C | 0.19  | 0.01 |
| 5647 | U | 0.326 | 0    |
| 5648 | C | 0.637 | 0.01 |
| 5649 | C | 0.719 | 0.01 |
| 5650 | A | 0.515 | 0.03 |
| 5651 | G | 1.275 | 0.05 |
| 5652 | A | 1.424 | 0.03 |
| 5653 | A | 1.112 | 0    |
| 5654 | A | 0.42  | 0    |
| 5655 | A | 0.787 | 0    |
| 5656 | U | 0.434 | 0    |
| 5657 | G | 0.732 | 0    |
| 5658 | A | 1.004 | 0    |
| 5659 | A | 0.922 | 0    |
| 5660 | G | 0.882 | 0    |
| 5661 | G | 0.977 | 0.03 |
| 5662 | A | 1.085 | 0.63 |
| 5663 | C | 0.61  | 0.97 |
| 5664 | C | 0.136 | 0.67 |
| 5665 | A | 0.922 | 0.36 |
| 5666 | C | 0     | 0.29 |
| 5667 | A | 0.448 | 0.28 |
| 5668 | A | 0.502 | 0.03 |
| 5669 | A | 0.651 | 0.03 |
| 5670 | G | 0.326 | 0.06 |
| 5671 | G | 0.109 | 0.04 |
| 5672 | G | 0.19  | 0.04 |
| 5673 | A | 0.922 | 0.01 |

|      |   |       |      |
|------|---|-------|------|
| 5674 | A | 0.719 | 0.01 |
| 5675 | C | 0     | 0.07 |
| 5676 | C | 0.339 | 0.08 |
| 5677 | A | 0.19  | 0.08 |
| 5678 | U | 0     | 0.4  |
| 5679 | G | 1.221 | 0.71 |
| 5680 | G | 0.827 | 0.51 |
| 5681 | G | 1.438 | 0.21 |
| 5682 | A | 0.827 | 0.03 |
| 5683 | U | 0.271 | 0.02 |
| 5684 | G | 1.506 | 0.02 |
| 5685 | A | 1.777 | 0.01 |
| 5686 | A | 0.732 | 0.05 |
| 5687 | U |       | 0.41 |
| 5688 | G | 0.068 | 0.6  |
| 5689 | G | 0.583 | 0.6  |
| 5690 | G | 0.827 | 0.1  |
| 5691 | U | 1.302 | 0.16 |
| 5692 | A | 1.736 | 0.14 |
| 5693 | G | 0.963 | 0.09 |
| 5694 | U | 0.787 | 0.11 |
| 5695 | G | 1.465 | 0.1  |
| 5696 | G | 0.475 | 0.08 |
| 5697 | A | 0     | 0.03 |
| 5698 | G | 0.122 | 0.02 |
| 5699 | G |       | 0.05 |
| 5700 | U | 0.42  | 0.11 |
| 5701 | U | 0.61  | 0.13 |
| 5702 | C | 0.936 | 0.38 |
| 5703 | U | 0.977 | 0.59 |
| 5704 | G | 0.217 | 0.29 |
| 5705 | G | 0.515 | 0.22 |
| 5706 | A | 0.298 | 0.11 |
| 5707 | A | 0.868 | 0.07 |
| 5708 | G | 0.977 | 0.05 |
| 5709 | A | 0.841 | 0.18 |
| 5710 | A | 0.705 | 0.2  |
| 5711 | C | 0.149 | 0.25 |
| 5712 | U | 0.095 | 0.39 |
| 5713 | G | 0.543 | 0.41 |
| 5714 | A | 0.502 | 0.31 |
| 5715 | A | 0.821 | 0.09 |
| 5716 | A | 0.821 | 0.06 |

|      |   |       |      |
|------|---|-------|------|
| 5717 | G | 0.929 | 0.01 |
| 5718 | A | 1.044 | 0.49 |
| 5719 | A | 0.861 | 0.69 |
| 5720 | G | 0.943 | 0.61 |
| 5721 | A | 0.848 | 0.43 |
| 5722 | A | 0.658 | 0.55 |
| 5723 | G | 0.583 | 0.48 |
| 5724 | C | 0.312 | 0.32 |
| 5725 | U | 0.814 | 0.2  |
| 5726 | U | 1.062 | 0.44 |
| 5727 | U | 1.515 | 0.52 |
| 5728 | A | 1.723 | 0.69 |
| 5729 | A | 0.977 | 0.72 |
| 5730 | A | 0.85  | 0.67 |
| 5731 | A | 0.918 | 0.07 |
| 5732 | C | 0.723 | 0.03 |
| 5733 | A | 0.515 | 0.03 |
| 5734 | U | 0.271 | 0.2  |
| 5735 | U | 0.515 | 0.9  |
| 5736 | U | 0.981 | 0.98 |
| 5737 | U | 1.221 | 0.96 |
| 5738 | G | 1.289 | 0.32 |
| 5739 | A | 0.972 | 0.19 |
| 5740 | U | 0.203 | 0    |
| 5741 | C | 0.529 | 0.01 |
| 5742 | C | 0.298 | 0.01 |
| 5743 | U | 0.549 | 0    |
| 5744 | C | 0.563 | 0    |
| 5745 | G | 0.226 | 0.3  |
| 5746 | C | 0.09  | 0.33 |
| 5747 | U | 0.127 | 0.58 |
| 5748 | U | 0.326 | 0.6  |
| 5749 | G | 0.264 | 0.52 |
| 5750 | C | 0.136 | 0.7  |
| 5751 | U | 0.565 | 0.65 |
| 5752 | A | 0.85  | 0.71 |
| 5753 | A | 0.628 | 0.63 |
| 5754 | C | 0.244 | 0.06 |
| 5755 | U | 0.212 | 0.07 |
| 5756 | G | 0.398 | 0.12 |
| 5757 | C | 0.402 | 0.11 |
| 5758 | A | 0.665 | 0.01 |
| 5759 | C | 0.312 | 0.23 |

|      |   |       |      |
|------|---|-------|------|
| 5760 | U | 0.529 | 0.88 |
| 5761 | U | 0.237 | 0.95 |
| 5762 | G | 0.461 | 0.62 |
| 5763 | G | 0.57  | 0.64 |
| 5764 | U | 0.552 | 0.48 |
| 5765 | A | 0.832 | 0.36 |
| 5766 | A | 0.918 | 0.28 |
| 5767 | U | 0.524 | 0.01 |
| 5768 | C | 0.443 | 0.88 |
| 5769 | A | 0.678 | 0.91 |
| 5770 | U | 0.344 | 0.96 |
| 5771 | A | 0.66  | 0.88 |
| 5772 | U | 0.407 | 0.81 |
| 5773 | C | 0.332 | 0.89 |
| 5774 | U | 0.441 | 0.86 |
| 5775 | A | 1.252 | 0.61 |
| 5776 | U | 0.986 | 0.27 |
| 5777 | A | 1.659 | 0.2  |
| 5778 | A | 1.049 | 0.09 |
| 5779 | U | 0.827 | 0.12 |
| 5780 | A | 0.714 | 0.23 |
| 5781 | G | 0.466 | 0.17 |
| 5782 | A | 1.017 | 0.04 |
| 5783 | C | 0.497 | 0.04 |
| 5784 | A | 0.561 | 0.23 |
| 5785 | U | 0.353 | 0.66 |
| 5786 | G | 0.52  | 0.95 |
| 5787 | G | 0.549 | 0.85 |
| 5788 | A | 0.617 | 0.52 |
| 5789 | G | 0.42  | 0.22 |
| 5790 | A | 0.414 | 0.15 |
| 5791 | C | 0.237 | 0.59 |
| 5792 | A | 0.373 | 0.59 |
| 5793 | C | 0.102 | 0.68 |
| 5794 | C | 0.041 | 0.76 |
| 5795 | C | 0.115 | 0.83 |
| 5796 | U | 0.353 | 0.82 |
| 5797 | U | 0.326 | 0.74 |
| 5798 | G | 0.644 | 0.6  |
| 5799 | A | 0.977 | 0.63 |
| 5800 | G | 0.665 | 0.69 |
| 5801 | G | 0.475 | 0.67 |
| 5802 | G | 0.346 | 0.92 |

|      |   |       |      |
|------|---|-------|------|
| 5803 | A | 0.434 | 0.98 |
| 5804 | G | 0.21  | 0.79 |
| 5805 | C | 0.495 | 0.13 |
| 5806 | A | 0.814 | 0.06 |
| 5807 | G | 0.305 | 0.13 |
| 5808 | G | 0.692 | 0.31 |
| 5809 | A | 0.705 | 0.27 |
| 5810 | G | 0.719 | 0.13 |
| 5811 | A | 0.943 | 0.09 |
| 5812 | A | 0.617 | 0.17 |
| 5813 | C | 0.149 | 0.76 |
| 5814 | U | 0.346 | 0.92 |
| 5815 | C | 0.631 | 0.87 |
| 5816 | A | 1.004 | 0.4  |
| 5817 | U | 0.597 | 0.76 |
| 5818 | U | 2.028 | 0.94 |
| 5819 | A | 1.689 | 0.96 |
| 5820 | G | 0.936 | 0.86 |
| 5821 | A | 0.814 | 0.88 |
| 5822 | A | 0.766 | 0.72 |
| 5823 | U | 0.136 | 0.78 |
| 5824 | C | 0.068 | 0.71 |
| 5825 | C | 0.027 | 0.64 |
| 5826 | U | 0.075 | 0.58 |
| 5827 | C | 0.068 | 0.4  |
| 5828 | C | 0.149 | 0.4  |
| 5829 | A | 0.8   | 0.43 |
| 5830 | A | 1.099 | 0.43 |
| 5831 | C | 0.699 | 0.4  |
| 5832 | G | 0.936 | 0.74 |
| 5833 | A | 0.787 | 0.89 |
| 5834 | G | 0.522 | 0.58 |
| 5835 | C | 0.237 | 0.1  |
| 5836 | G | 0.176 | 0.09 |
| 5837 | C | 0.129 | 0.34 |
| 5838 | U | 0.088 | 0.55 |
| 5839 | C | 0.183 | 0.68 |
| 5840 | U | 1.058 | 0.64 |
| 5841 | U | 0.882 | 0.59 |
| 5842 | C | 0.407 | 0.17 |
| 5843 | A | 0.719 | 0.01 |
| 5844 | U | 0.339 | 0.01 |
| 5845 | G | 0.461 | 0.14 |



|      |   |       |          |
|------|---|-------|----------|
| 5846 | C | 0.42  | 0.82     |
| 5847 | A | 0.841 | 0.75     |
| 5848 | U | 0.529 | 0.39     |
| 5849 | U | 0.665 | 0.48     |
| 5850 | U | 0.597 | 0.55     |
| 5851 | C | 0.732 | 0.52     |
| 5852 | A | 0.732 | 0.04     |
| 5853 | G | 0.502 | 0.02     |
| 5854 | A | 0.556 | 0.21     |
| 5855 | G | 0.366 | 0.33     |
| 5856 | G | 0.448 | 0.14     |
| 5857 | C | 0.434 | 0.06     |
| 5858 | G | 0.163 | 0.22     |
| 5859 | G | 0.122 | 0.58     |
| 5860 | A | 0.19  | 0.52     |
| 5861 | U | 0.095 | 0.8      |
| 5862 | G | 0.176 | 0.8      |
| 5863 | C | 0.122 | 0.06     |
| 5864 | A | 0.109 | 0        |
| 5865 | U | 0.081 | 6.43E-05 |
| 5866 | C | 0.081 | 0        |
| 5867 | C | 0.149 | 0.01     |
| 5868 | A | 0.312 | 0.01     |
| 5869 | C | 0.136 | 0.49     |
| 5870 | U | 0.136 | 1        |
| 5871 | C | 0.041 | 0.97     |
| 5872 | C | 0.353 | 0.78     |
| 5873 | A | 0.515 | 0.91     |
| 5874 | G | 0.732 | 0.84     |
| 5875 | A | 0.827 | 0.02     |
| 5876 | A | 0.936 | 0.03     |
| 5877 | U | 0.543 | 0.14     |
| 5878 | C | 0.271 | 0.3      |
| 5879 | G | 0.285 | 0.87     |
| 5880 | G | 0.136 | 0.84     |
| 5881 | C | 0.068 | 0.09     |
| 5882 | C | 0.217 | 0.11     |
| 5883 | A | 0.258 | 0.11     |
| 5884 | A | 0.366 | 0.07     |
| 5885 | C | 0.149 | 0.04     |
| 5886 | C | 0     | 0.02     |
| 5887 | U | 0     | 0.04     |
| 5888 | G | 0     | 0.35     |

|      |   |       |      |
|------|---|-------|------|
| 5889 | G |       | 0.8  |
| 5890 | G | 0.095 | 0.83 |
| 5891 | G | 0.054 | 0.7  |
| 5892 | G | 0.041 | 0.92 |
| 5893 | A | 0.027 | 0.93 |
| 5894 | G | 0.027 | 0.86 |
| 5895 | G | 0.136 | 0.78 |
| 5896 | A | 0.597 | 0.03 |
| 5897 | A | 1.126 | 0    |
| 5898 | A | 0.705 | 0.01 |
| 5899 | U | 0.529 | 0.07 |
| 5900 | C | 0.068 | 0.81 |
| 5901 | C | 0     | 0.84 |
| 5902 | U | 0     | 0.93 |
| 5903 | C | 0     | 0.95 |
| 5904 | U | 0.068 | 0.69 |
| 5905 | C | 0.068 | 0.79 |
| 5906 | U | 0.217 | 0.79 |
| 5907 | C |       | 0.38 |
| 5908 | A | 0.231 | 0.13 |
| 5909 | G | 0.203 | 0.13 |
| 5910 | C | 0.244 | 0.08 |
| 5911 | U | 0.678 | 0.11 |
| 5912 | A | 1.228 | 0.06 |
| 5913 | U | 0.292 | 0.05 |
| 5914 | A | 0.109 | 0.06 |
| 5915 | C | 0.088 | 0.27 |
| 5916 | C | 0.034 | 0.28 |
| 5917 | G | 0.136 | 0.19 |
| 5918 | C | 0.129 | 0.05 |
| 5919 | C | 0.014 | 0.22 |
| 5920 | C | 0     | 0.48 |
| 5921 | U | 0.149 | 0.3  |
| 5922 | C | 0.081 | 0.86 |
| 5923 | U | 1.16  | 0.92 |
| 5924 | A | 1.533 | 0.79 |
| 5925 | G | 1.099 | 0.95 |
| 5926 | A | 1.37  | 0.95 |
| 5927 | A | 0.346 | 0.01 |
| 5928 | G | 0.007 | 0    |
| 5929 | C | 0.081 | 0.24 |
| 5930 | A | 0.095 | 0.25 |
| 5931 | U | 0.034 | 0.71 |

|      |   |       |      |
|------|---|-------|------|
| 5932 | G | 0.047 | 0.73 |
| 5933 | C | 0.183 | 0.74 |
| 5934 | U | 0.943 | 0.68 |
| 5935 | A | 0.977 | 0.46 |
| 5936 | U | 1.234 | 0.55 |
| 5937 | A | 0.855 | 0.41 |
| 5938 | A | 0.712 | 0.03 |
| 5939 | C | 0.217 | 0.03 |
| 5940 | A | 0.19  | 0.34 |
| 5941 | C | 0.041 | 0.46 |
| 5942 | A | 0.081 | 0.24 |
| 5943 | U | 0.068 | 0.27 |
| 5944 | G | 0.027 | 0.27 |
| 5945 | C | 0.034 | 0.12 |
| 5946 | U | 0.366 | 0.61 |
| 5947 | A | 1.078 | 0.63 |
| 5948 | U | 0.644 | 0.33 |
| 5949 | U | 0.42  | 0.7  |
| 5950 | G | 0.902 | 0.78 |
| 5951 | U | 1.77  | 0.67 |
| 5952 | A | 1.194 | 0.64 |
| 5953 | A | 0.929 | 0.02 |
| 5954 | A | 1.051 | 0    |
| 5955 | A | 1.166 | 0    |
| 5956 | A | 1.343 | 0.01 |
| 5957 | G | 0.977 | 0.09 |
| 5958 | U | 0.488 | 0.93 |
| 5959 | G | 0.387 | 0.95 |
| 5960 | U | 0.312 | 0.86 |
| 5961 | U | 1.004 | 0.66 |
| 5962 | G | 0.529 | 0.24 |
| 5963 | C | 0.041 | 0.23 |
| 5964 | U | 0.122 | 0.09 |
| 5965 | A | 0.298 | 0.08 |
| 5966 | C | 0.027 | 0.04 |
| 5967 | C | 0.095 | 0.45 |
| 5968 | A | 0.102 | 0.48 |
| 5969 | U | 0.339 | 0.3  |
| 5970 | U | 0.529 | 0.11 |
| 5971 | G | 0.007 | 0.3  |
| 5972 | C | 0.014 | 0.3  |
| 5973 | C | 0.088 | 0.42 |
| 5974 | A | 0.095 | 0.44 |

|      |   |       |      |
|------|---|-------|------|
| 5975 | G | 0.047 | 0.26 |
| 5976 | U | 0.163 | 0.83 |
| 5977 | U | 0.855 | 0.88 |
| 5978 | U | 0.909 | 0.91 |
| 5979 | U | 0.746 | 0.94 |
| 5980 | G | 0.434 | 0.81 |
| 5981 | U | 0.095 | 0.81 |
| 5982 | U | 0.285 | 0.93 |
| 5983 | U | 0.366 | 0.85 |
| 5984 | U | 0.271 | 0.32 |
| 5985 | C | 0.326 | 0.15 |
| 5986 | U | 1.099 | 0.11 |
| 5987 | U | 0.665 | 0.01 |
| 5988 | A | 1.892 | 0.08 |
| 5989 | A | 1.031 | 0.48 |
| 5990 | A | 1.024 | 0.83 |
| 5991 | A | 1.16  | 0.59 |
| 5992 | A | 1.194 | 0.2  |
| 5993 | A | 0.732 | 0.15 |
| 5994 | G | 0.292 | 0.15 |
| 5995 | G | 0.115 | 0.09 |
| 5996 | C | 0.102 | 0.02 |
| 5997 | U | 0.21  | 0.07 |
| 5998 | U | 0.271 | 0.08 |
| 5999 | G | 0.21  | 0.02 |
| 6000 | G | 0.163 | 0.1  |
| 6001 | G | 0.19  | 0.16 |
| 6002 | G | 0.353 | 0.21 |
| 6003 | A | 0.57  | 0.7  |
| 6004 | U | 0.536 | 0.78 |
| 6005 | A | 0.922 | 0.86 |
| 6006 | U | 0.292 | 0.88 |
| 6007 | G | 0.631 | 0.86 |
| 6008 | U | 0.312 | 0.92 |
| 6009 | U | 0.868 | 0.36 |
| 6010 | A | 1.119 | 0.35 |
| 6011 | U | 0.604 | 0.74 |
| 6012 | G | 0.739 | 0.7  |
| 6013 | A | 0.366 | 0.66 |
| 6014 | G | 0.353 | 0.95 |
| 6015 | C | 0.149 | 0.95 |
| 6016 | A | 0.543 | 0.83 |
| 6017 | A | 0.624 | 0.02 |

|      |   |       |      |
|------|---|-------|------|
| 6018 | U | 0.244 | 0.01 |
| 6019 | C | 0.285 | 0    |
| 6020 | A | 0.719 | 0.02 |
| 6021 | C | 0.38  | 0.08 |
| 6022 | G | 1.139 | 0.1  |
| 6023 | A | 0.936 | 0.04 |
| 6024 | A | 1.004 | 0.06 |
| 6025 | A | 0.977 | 0.11 |
| 6026 | G | 0.651 | 0.09 |
| 6027 | A | 0.8   | 0.04 |
| 6028 | G | 0.651 | 0.59 |
| 6029 | A | 0.963 | 0.59 |
| 6030 | A | 0.868 | 0.34 |
| 6031 | G | 0.739 | 0.38 |
| 6032 | A | 1.01  | 0.09 |
| 6033 | A | 0.814 | 0.03 |
| 6034 | G | 0.983 | 0.03 |
| 6035 | A | 1.383 | 0.02 |
| 6036 | A | 0.712 | 0.02 |
| 6037 | C | 0     | 0.4  |
| 6038 | U | 0.285 | 0.98 |
| 6039 | C | 0.109 | 0.79 |
| 6040 | C | 0.353 | 0.24 |
| 6041 | G | 1.187 | 0.02 |
| 6042 | A | 1.383 | 0.01 |
| 6043 | A | 0.773 | 0.01 |
| 6044 | A | 1.133 | 0.03 |
| 6045 | A | 1.397 | 0.03 |
| 6046 | A | 1.356 | 0.01 |
| 6047 | G | 0.509 | 0.01 |
| 6048 | G | 0.149 | 0.01 |
| 6049 | C | 0     | 0.03 |
| 6050 | U | 0.292 | 0.97 |
| 6051 | A | 0.834 | 0.95 |
| 6052 | A | 1.058 | 0.68 |
| 6053 | G | 0.678 | 0.73 |
| 6054 | G | 0.122 | 0.67 |
| 6055 | C | 0     | 0.16 |
| 6056 | U | 0.38  | 0.16 |
| 6057 | A | 1.35  | 0.05 |
| 6058 | A | 1.2   | 0.02 |
| 6059 | U | 1.051 | 0.01 |
| 6060 | A | 0.529 | 0    |

|      |   |       |          |
|------|---|-------|----------|
| 6061 | C | 0     | 0.01     |
| 6062 | A | 0.414 | 0.01     |
| 6063 | U | 0.034 | 0.56     |
| 6064 | C | 0     | 0.79     |
| 6065 | U | 0.251 | 0.8      |
| 6066 | U | 0.136 | 0.34     |
| 6067 | C | 0.088 | 0.85     |
| 6068 | U | 0.346 | 0.85     |
| 6069 | G | 0.509 | 0.03     |
| 6070 | C | 0.129 | 0.11     |
| 6071 | A | 0.176 | 0.23     |
| 6072 | U | 0.285 | 0.2      |
| 6073 | C | 0.244 | 0.06     |
| 6074 | A | 1.058 | 0.11     |
| 6075 | A | 1.492 | 0.08     |
| 6076 | A | 1.261 | 0.08     |
| 6077 | C | 0.637 | 0.04     |
| 6078 | A | 0.76  | 0.08     |
| 6079 | A | 0.604 | 0.45     |
| 6080 | G | 0.353 | 0.6      |
| 6081 | U | 1.37  | 0.22     |
| 6082 | A | 1.072 | 0.22     |
| 6083 | A | 0.631 | 0.61     |
| 6084 | G | 0.556 | 0.63     |
| 6085 | U | 1.139 | 0.98     |
| 6086 | A | 1.031 | 0.97     |
| 6087 | U | 0.515 | 0.05     |
| 6088 | G | 0.339 | 0.02     |
| 6089 | G | 0.332 | 0        |
| 6090 | G | 0.366 | 7.16E-05 |
| 6091 | A | 0.556 | 7.10E-05 |
| 6092 | U | 0.393 | 0        |
| 6093 | G | 0.509 | 0        |
| 6094 | U | 0.258 | 0        |
| 6095 | C | 0.156 | 0        |
| 6096 | U | 0.217 | 0        |
| 6097 | U | 0.285 | 0.02     |
| 6098 | G | 0.332 | 0.04     |
| 6099 | G | 0.271 | 0.03     |
| 6100 | G | 0.556 | 0        |
| 6101 | A | 0.692 | 0.99     |
| 6102 | A | 0.861 | 0.99     |
| 6103 | U | 0.434 | 0.05     |

|      |   |       |          |
|------|---|-------|----------|
| 6104 | C | 0.414 | 0.04     |
| 6105 | A | 0.868 | 0        |
| 6106 | G | 0.502 | 4.19E-05 |
| 6107 | C | 0.115 | 0        |
| 6108 | U | 0.576 | 0        |
| 6109 | G | 0.285 | 0.05     |
| 6110 | C | 0.509 | 0.05     |
| 6111 | U | 1.078 | 0.99     |
| 6112 | U | 1.153 | 0.98     |
| 6113 | A | 0.482 | 0        |
| 6114 | U | 0.298 | 0.03     |
| 6115 | C | 0.644 | 0.04     |
| 6116 | G | 0     | 0.02     |
| 6117 | C | 0.102 | 0        |
| 6118 | C | 0.149 | 7.98E-05 |
| 6119 | A | 0.427 | 0        |
| 6120 | U | 0.197 | 0        |
| 6121 | C | 0.075 | 0        |
| 6122 | U | 0.387 | 0        |
| 6123 | U | 0.332 | 0.15     |
| 6124 | G | 0.556 | 0.2      |
| 6125 | C | 0.163 | 0.23     |
| 6126 | U | 0.57  | 0.26     |
| 6127 | U | 0.244 | 0.11     |
| 6128 | U | 1.234 | 0.08     |
| 6129 | U | 1.912 | 0.64     |
| 6130 | A | 1.621 | 0.66     |
| 6131 | A | 1.302 | 0.39     |
| 6132 | G | 0.549 | 0.24     |
| 6133 | U | 0.278 | 0.2      |
| 6134 | G | 0.312 | 0.17     |
| 6135 | U | 0.109 | 0.06     |
| 6136 | C | 0.061 | 0.25     |
| 6137 | U | 0.685 | 0.7      |
| 6138 | A | 1.099 | 0.62     |
| 6139 | U | 0.393 | 0.01     |
| 6140 | G | 0.549 | 0.03     |
| 6141 | G | 0.319 | 0.03     |
| 6142 | G | 0.366 | 0.01     |
| 6143 | A | 0.631 | 0.01     |
| 6144 | U | 0.203 | 0.04     |
| 6145 | C | 0.109 | 0.04     |
| 6146 | U | 0.909 | 0.05     |

|      |   |       |      |
|------|---|-------|------|
| 6147 | A | 0.888 | 0.05 |
| 6148 | U | 0.549 | 0.04 |
| 6149 | U | 0.346 | 0.05 |
| 6150 | G | 0.624 | 0.05 |
| 6151 | U | 0.515 | 0.05 |
| 6152 | A | 0.827 | 0.06 |
| 6153 | C | 0.054 | 0.08 |
| 6154 | U | 0.122 | 0.95 |
| 6155 | C | 0.176 | 0.95 |
| 6156 | U | 1.085 | 0.68 |
| 6157 | A | 1.451 | 0.38 |
| 6158 | U | 1.411 | 0.34 |
| 6159 | A | 1.302 | 0.14 |
| 6160 | U | 0.353 | 0.13 |
| 6161 | G | 0.19  | 0.17 |
| 6162 | U | 0.149 | 0.15 |
| 6163 | C | 0.014 | 0.02 |
| 6164 | A | 0.393 | 0.18 |
| 6165 | C | 0.353 | 0.21 |
| 6166 | A | 0.787 | 0.66 |
| 6167 | G | 0.502 | 0.7  |
| 6168 | U | 0     | 0.68 |
| 6169 | C | 0     | 0.29 |
| 6170 | U | 0.258 | 0.75 |
| 6171 | U | 0.461 | 0.79 |
| 6172 | U | 0.529 | 0.58 |
| 6173 | U | 1.004 | 0.74 |
| 6174 | A | 1.438 | 0.81 |
| 6175 | U | 0.448 | 0.65 |
| 6176 | G | 0.271 | 0.61 |
| 6177 | G | 0.312 | 0.29 |
| 6178 | U | 0.027 | 0.15 |
| 6179 | G | 0.407 | 0.2  |
| 6180 | U | 0.543 | 0.22 |
| 6181 | A | 0.963 | 0.17 |
| 6182 | C | 0.515 | 0.2  |
| 6183 | C | 0.488 | 0.27 |
| 6184 | A | 1.072 | 0.08 |
| 6185 | G | 0.081 | 0.09 |
| 6186 | C | 0.041 | 0.47 |
| 6187 | U | 0.244 | 0.67 |
| 6188 | U | 0.366 | 0.76 |
| 6189 | G | 0.122 | 0.81 |



|      |   |       |      |
|------|---|-------|------|
| 6190 | G | 0.244 | 0.74 |
| 6191 | A | 0.407 | 0.66 |
| 6192 | G | 0.109 | 0.64 |
| 6193 | G | 0     | 0.21 |
| 6194 | A | 0.543 | 0.37 |
| 6195 | A | 0.692 | 0.48 |
| 6196 | U | 0.393 | 0.44 |
| 6197 | G | 0.597 | 0.19 |
| 6198 | C | 0.163 | 0.16 |
| 6199 | G | 1.085 | 0.27 |
| 6200 | A | 0.488 | 0.16 |
| 6201 | C | 0     | 0.01 |
| 6202 | A | 0.868 | 0.06 |
| 6203 | A | 0.271 | 0.37 |
| 6204 | U | 0.353 | 0.91 |
| 6205 | U | 0.312 | 0.94 |
| 6206 | C | 0.244 | 0.71 |
| 6207 | C | 0.244 | 0.67 |
| 6208 | C | 0.109 | 0.63 |
| 6209 | C | 0     | 0.62 |
| 6210 | U | 0.231 | 0.15 |
| 6211 | C | 0.122 | 0.09 |
| 6212 | U | 0.231 | 0.36 |
| 6213 | U | 0.027 | 0.51 |
| 6214 | U | 0.651 | 0.56 |
| 6215 | U | 0.326 | 0.77 |
| 6216 | G | 0.556 | 0.76 |
| 6217 | U | 0.665 | 0.8  |
| 6218 | G | 0.298 | 0.35 |
| 6219 | C | 0     | 0.05 |
| 6220 | A | 0.773 | 0.05 |
| 6221 | A | 0.719 | 0.03 |
| 6222 | C | 0.068 | 0.1  |
| 6223 | C | 0.014 | 0.38 |
| 6224 | A | 0.773 | 0.39 |
| 6225 | A | 0.936 | 0.16 |
| 6226 | G | 0.909 | 0.13 |
| 6227 | A | 1.112 | 0.12 |
| 6228 | A | 1.533 | 0.43 |
| 6229 | U | 1.044 | 0.41 |
| 6230 | A | 1.668 | 0.52 |
| 6231 | G | 0.746 | 0.48 |
| 6232 | G | 0.203 | 0.41 |

|      |   |       |      |
|------|---|-------|------|
| 6233 | G | 0.068 | 0.27 |
| 6234 | A | 0.909 | 0.23 |
| 6235 | U | 0.705 | 0.16 |
| 6236 | A | 0.651 | 0.17 |
| 6237 | C | 0.312 | 0.23 |
| 6238 | U | 0.637 | 0.23 |
| 6239 | U | 0.665 | 0.22 |
| 6240 | G | 0.081 | 0.85 |
| 6241 | G | 0.244 | 0.9  |
| 6242 | G | 0.041 | 0.74 |
| 6243 | G | 0.163 | 0.71 |
| 6244 | A | 0.8   | 0.62 |
| 6245 | A | 0.407 | 0.57 |
| 6246 | C | 0.461 | 0.13 |
| 6247 | A | 0.895 | 0.09 |
| 6248 | A | 1.736 | 0.28 |
| 6249 | C | 0.136 | 0.29 |
| 6250 | U | 0.271 | 0.29 |
| 6251 | C | 0.407 | 0.32 |
| 6252 | A | 0.773 | 0.33 |
| 6253 | G | 0.705 | 0.38 |
| 6254 | U | 0.502 | 0.55 |
| 6255 | G | 0.488 | 0.3  |
| 6256 | C | 0.122 | 0.23 |
| 6257 | C | 0.217 | 0.21 |
| 6258 | U | 0.434 | 0.15 |
| 6259 | A | 0.515 | 0.08 |
| 6260 | C | 0.244 | 0.21 |
| 6261 | C | 0.109 | 0.29 |
| 6262 | A | 0.434 | 0.35 |
| 6263 | G | 0.42  | 0.27 |
| 6264 | A | 1.356 | 0.19 |
| 6265 | U | 0.42  | 0.24 |
| 6266 | A | 0.719 | 0.65 |
| 6267 | A | 1.207 | 0.67 |
| 6268 | U | 0.285 | 0.76 |
| 6269 | G | 0.014 | 0.17 |
| 6270 | G | 0.149 | 0.5  |
| 6271 | U | 0.068 | 0.54 |
| 6272 | G | 0.366 | 0.08 |
| 6273 | A | 0.61  | 0.38 |
| 6274 | U | 0.624 | 0.41 |
| 6275 | U | 0.637 | 0.45 |

|      |   |       |      |
|------|---|-------|------|
| 6276 | A | 0.515 | 0.56 |
| 6277 | U | 0.651 | 0.46 |
| 6278 | U | 0.76  | 0.03 |
| 6279 | C | 0.136 | 0.03 |
| 6280 | A | 1.275 | 0.01 |
| 6281 | G | 0.732 | 0.01 |
| 6282 | A | 1.587 | 0    |
| 6283 | A | 0.705 | 0    |
| 6284 | G | 0.909 | 0    |
| 6285 | U | 0.529 | 0    |
| 6286 | G | 0.285 | 0    |
| 6287 | G | 0.203 | 0    |
| 6288 | C | 0     | 0    |
| 6289 | C | 0.353 | 0.04 |
| 6290 | C | 0.163 | 0.1  |
| 6291 | U | 0.366 | 0.78 |
| 6292 | U | 0.665 | 0.9  |
| 6293 | A | 1.017 | 0.25 |
| 6294 | A | 0.719 | 0.17 |
| 6295 | U | 0.407 | 0.02 |
| 6296 | G | 0.42  | 0.02 |
| 6297 | U | 0.014 | 0.65 |
| 6298 | U | 0.217 | 0.66 |
| 6299 | A | 0.814 | 0.15 |
| 6300 | C | 0     | 0.3  |
| 6301 | A | 0.963 | 0.48 |
| 6302 | G | 0.393 | 0.29 |
| 6303 | A | 0.882 | 0.14 |
| 6304 | A | 0.637 | 0.05 |
| 6305 | A | 0.922 | 0.07 |
| 6306 | G | 0.448 | 0.09 |
| 6307 | C | 0.136 | 0.26 |
| 6308 | U | 0.095 | 0.52 |
| 6309 | U | 0.855 | 0.62 |
| 6310 | U | 0.366 | 0.44 |
| 6311 | G | 0.515 | 0.35 |
| 6312 | A | 0.556 | 0.41 |
| 6313 | U | 0.271 | 0.39 |
| 6314 | G | 0.068 | 0.37 |
| 6315 | C | 0.081 | 0.51 |
| 6316 | C | 0.081 | 0.53 |
| 6317 | U | 0.041 | 0.73 |
| 6318 | G | 0.855 | 0.73 |

|      |   |       |      |
|------|---|-------|------|
| 6319 | G | 0.909 | 0.55 |
| 6320 | A | 0.827 | 0.12 |
| 6321 | A | 0.461 | 0.49 |
| 6322 | U | 0.4   | 0.5  |
| 6323 | A | 0.576 | 0.32 |
| 6324 | A | 0.76  | 0.24 |
| 6325 | U | 0.692 | 0.27 |
| 6326 | A | 0.793 | 0.38 |
| 6327 | C | 0.047 | 0.46 |
| 6328 | A | 0.305 | 0.47 |
| 6329 | G | 0.882 | 0.28 |
| 6330 | U | 0.495 | 0.31 |
| 6331 | C | 0.366 | 0.13 |
| 6332 | A | 0.522 | 0.26 |
| 6333 | C | 0.081 | 0.48 |
| 6334 | A | 0.888 | 0.52 |
| 6335 | G | 0.732 | 0.22 |
| 6336 | A | 0.97  | 0.18 |
| 6337 | A | 0.475 | 0.3  |
| 6338 | C | 0.163 | 0.43 |
| 6339 | A | 0.095 | 0.37 |
| 6340 | G | 0.339 | 0.04 |
| 6341 | G | 0.258 | 0.09 |
| 6342 | C | 0.258 | 0.28 |
| 6343 | A | 0.298 | 0.37 |
| 6344 | A | 0.393 | 0.34 |
| 6345 | U | 0.326 | 0.36 |
| 6346 | A | 0.461 | 0.31 |
| 6347 | G | 0.353 | 0.12 |
| 6348 | A | 0.624 | 0.09 |
| 6349 | G | 0.285 | 0.01 |
| 6350 | G | 0.434 | 0.05 |
| 6351 | A | 0.543 | 0.1  |
| 6352 | U | 0.285 | 0.82 |
| 6353 | G | 0.448 | 0.82 |
| 6354 | U | 0     | 0.66 |
| 6355 | A | 0.475 | 0.11 |
| 6356 | U | 0     | 0.69 |
| 6357 | G | 0.366 | 0.71 |
| 6358 | G | 0.42  | 0.45 |
| 6359 | C | 0.244 | 0.19 |
| 6360 | A | 0.461 | 0.29 |
| 6361 | A | 0.556 | 0.43 |

|      |   |       |      |
|------|---|-------|------|
| 6362 | C | 0.353 | 0.37 |
| 6363 | U | 0.244 | 0.73 |
| 6364 | C | 0.203 | 0.64 |
| 6365 | U | 0.624 | 0.79 |
| 6366 | U | 1.221 | 0.66 |
| 6367 | U | 0.895 | 0.1  |
| 6368 | G | 0.556 | 0.47 |
| 6369 | A | 0.203 | 0.53 |
| 6370 | G | 0.461 | 0.1  |
| 6371 | A | 0.529 | 0.15 |
| 6372 | C | 0.136 | 0.14 |
| 6373 | C | 0.217 | 0.05 |
| 6374 | U | 0.109 | 0.59 |
| 6375 | C | 0.258 | 0.57 |
| 6376 | A | 0.57  | 0.29 |
| 6377 | A | 0.692 | 0.6  |
| 6378 | U | 1.072 | 0.62 |
| 6379 | A | 1.316 | 0.48 |
| 6380 | A | 0.434 | 0.23 |
| 6381 | A | 0.461 | 0.23 |
| 6382 | G | 0.122 | 0.21 |
| 6383 | C | 0.163 | 0.81 |
| 6384 | C | 0.122 | 0.81 |
| 6385 | U | 0.176 | 0.81 |
| 6386 | U | 0.203 | 1    |
| 6387 | G | 0.407 | 0.97 |
| 6388 | U | 0.556 | 0.96 |
| 6389 | G | 0.339 | 0.71 |
| 6390 | U | 0.42  | 0.65 |
| 6391 | A | 1.004 | 0.41 |
| 6392 | A | 1.017 | 0.36 |
| 6393 | A | 0.488 | 0.27 |
| 6394 | A | 0.583 | 0.2  |
| 6395 | U | 0.705 | 0.2  |
| 6396 | U | 0.515 | 0.24 |
| 6397 | A | 0.095 | 0.08 |
| 6398 | U | 0.163 | 0.05 |
| 6399 | C | 0.149 | 0.05 |
| 6400 | C | 0.041 | 0.01 |
| 6401 | C | 0.231 | 0.01 |
| 6402 | C | 0     | 0.01 |
| 6403 | A | 0.312 | 0.01 |
| 6404 | U | 0.163 | 0.03 |

|      |   |       |          |
|------|---|-------|----------|
| 6405 | U | 0.882 | 0.06     |
| 6406 | A | 2.184 | 0.06     |
| 6407 | U | 0.42  | 0.13     |
| 6408 | G | 0.19  | 0.12     |
| 6409 | C | 0     | 0.1      |
| 6410 | A | 0.38  | 0.1      |
| 6411 | U | 0.176 | 0.15     |
| 6412 | U | 0.461 | 0.13     |
| 6413 | A | 0.787 | 0.45     |
| 6414 | C | 0.298 | 0.84     |
| 6415 | U | 0.583 | 0.78     |
| 6416 | A | 0.963 | 0.77     |
| 6417 | U | 0.434 | 0.03     |
| 6418 | G | 1.112 | 0.01     |
| 6419 | A | 1.329 | 0.05     |
| 6420 | G | 1.072 | 0.15     |
| 6421 | A | 0.624 | 0.97     |
| 6422 | U | 0.244 | 0.96     |
| 6423 | G | 0     | 0.86     |
| 6424 | C | 0.027 | 0.46     |
| 6425 | A | 0.637 | 0.13     |
| 6426 | A | 1.275 | 0.02     |
| 6427 | U | 0.38  | 0.01     |
| 6428 | A | 1.261 | 0        |
| 6429 | A | 0.936 | 0        |
| 6430 | A | 1.153 | 0.04     |
| 6431 | A | 0.963 | 0.04     |
| 6432 | G | 0.678 | 0.04     |
| 6433 | U | 0.393 | 0.04     |
| 6434 | G | 1.438 | 4.88E-06 |
| 6435 | A | 1.329 | 1.98E-06 |
| 6436 | G | 1.587 | 2.00E-06 |
| 6437 | A | 1.411 | 0        |
| 6438 | C | 0.543 | 0        |
| 6439 | A | 1.004 | 0        |
| 6440 | G | 0.936 | 0        |
| 6441 | A | 1.37  | 0        |
| 6442 | U | 1.031 | 0        |
| 6443 | A | 1.451 | 0        |
| 6444 | G | 0.597 | 0        |
| 6445 | A | 0.149 | 0        |
| 6446 | U | 0.068 | 0        |
| 6447 | G | 0.136 | 0        |

|      |   |       |          |
|------|---|-------|----------|
| 6448 | G | 0.502 | 0        |
| 6449 | G | 0.326 | 0        |
| 6450 | G | 0.054 | 0        |
| 6451 | A | 0.163 | 4.97E-06 |
| 6452 | U | 0.041 | 1.40E-05 |
| 6453 | U | 0.855 | 0        |
| 6454 | G | 1.207 | 0        |
| 6455 | A | 1.017 | 0        |
| 6456 | C | 0.515 | 4.01E-05 |
| 6457 | A | 1.207 | 0        |
| 6458 | A | 0.665 | 0        |
| 6459 | A | 1.194 | 0        |
| 6460 | A | 0.651 | 0        |
| 6461 | U | 0.475 | 0        |
| 6462 | C | 0.583 | 1.09E-05 |
| 6463 | A | 0.882 | 0        |
| 6464 | A | 1.316 | 0        |
| 6465 | U | 1.519 | 3.99E-05 |
| 6466 | A | 2.116 | 4.99E-06 |
| 6467 | A | 1.465 | 0        |
| 6468 | C | 1.017 | 0        |
| 6469 | A | 1.302 | 0        |
| 6470 | A | 0.922 | 0        |
| 6471 | C | 0.732 | 3.89E-06 |
| 6472 | A | 1.194 | 0        |
| 6473 | A | 0.909 | 0        |
| 6474 | C | 0.665 | 7.90E-05 |
| 6475 | A | 0.8   | 0        |
| 6476 | G | 0.339 | 0        |
| 6477 | C | 0.068 | 0        |
| 6478 | A | 0.502 | 0        |
| 6479 | U | 0.149 | 0        |
| 6480 | C | 0.298 | 9.64E-06 |
| 6481 | A | 0.977 | 1.63E-05 |
| 6482 | A | 0.705 | 0        |
| 6483 | C | 0.502 | 0        |
| 6484 | A | 1.126 | 0        |
| 6485 | A | 0.76  | 0        |
| 6486 | C | 0.583 | 4.69E-05 |
| 6487 | A | 1.126 | 0        |
| 6488 | U | 0.285 | 0        |
| 6489 | C | 0.448 | 0        |
| 6490 | A | 0.746 | 0        |

|      |   |       |          |
|------|---|-------|----------|
| 6491 | A | 0.61  | 0        |
| 6492 | C | 0.231 | 0.01     |
| 6493 | G | 0.76  | 0.05     |
| 6494 | A | 0.746 | 0.04     |
| 6495 | C | 0.488 | 0.02     |
| 6496 | A | 0.814 | 0.39     |
| 6497 | G | 0.068 | 0.39     |
| 6498 | C | 0.014 | 0.04     |
| 6499 | A | 0.19  | 0        |
| 6500 | U | 0.109 | 0        |
| 6501 | C | 0.217 | 0.04     |
| 6502 | A | 0.583 | 0.07     |
| 6503 | G | 0.868 | 0.05     |
| 6504 | C | 0.136 | 0.23     |
| 6505 | A | 1.072 | 0.38     |
| 6506 | A | 1.017 | 0.18     |
| 6507 | A | 1.316 | 0        |
| 6508 | A | 0.827 | 0        |
| 6509 | G | 1.004 | 3.91E-06 |
| 6510 | U | 1.519 | 9.96E-07 |
| 6511 | A | 1.302 | 0        |
| 6512 | G | 0.895 | 0        |
| 6513 | A | 0.637 | 9.99E-07 |
| 6514 | C | 0.543 | 9.98E-07 |
| 6515 | A | 1.044 | 5.59E-07 |
| 6516 | U | 0.556 | 0        |
| 6517 | G | 0.244 | 3.79E-06 |
| 6518 | G | 0.081 | 0.01     |
| 6519 | U | 0.054 | 0.01     |
| 6520 | C | 0.027 | 0        |
| 6521 | A | 1.316 | 0        |
| 6522 | A | 1.506 | 2.50E-06 |
| 6523 | U | 0.692 | 0        |
| 6524 | G | 0.949 | 0        |
| 6525 | A | 1.085 | 0.01     |
| 6526 | G | 0.515 | 0.01     |
| 6527 | A | 0.339 | 0        |
| 6528 | C | 0.109 | 0        |
| 6529 | U | 0.814 | 3.59E-06 |
| 6530 | A | 1.221 | 5.99E-07 |
| 6531 | G | 0.244 | 4.75E-07 |
| 6532 | U | 0.217 | 2.13E-07 |
| 6533 | U | 0.054 | 5.06E-05 |



|      |   |       |          |
|------|---|-------|----------|
| 6534 | C | 0.163 | 0        |
| 6535 | U | 0.488 | 0        |
| 6536 | U | 0.244 | 8.33E-05 |
| 6537 | G | 0.366 | 4.60E-07 |
| 6538 | U | 0.787 | 4.24E-07 |
| 6539 | A | 1.316 | 5.09E-05 |
| 6540 | U | 0.434 | 5.21E-05 |
| 6541 | A | 0.38  | 0        |
| 6542 | G | 0.122 | 0        |
| 6543 | C | 0.095 | 1.52E-05 |
| 6544 | C | 0.122 | 1.99E-05 |
| 6545 | C | 0.258 | 1.90E-05 |
| 6546 | A | 1.017 | 3.11E-05 |
| 6547 | G | 0.583 | 0        |
| 6548 | G | 0.434 | 0        |
| 6549 | A | 0.773 | 0.16     |
| 6550 | U | 0.8   | 0.17     |
| 6551 | A | 1.004 | 0.02     |
| 6552 | A | 0.814 | 0.02     |
| 6553 | U | 0.705 | 0.59     |
| 6554 | U | 0.393 | 0.6      |
| 6555 | G | 0.895 | 0.01     |
| 6556 | C | 0.393 | 0        |
| 6557 | A | 0.678 | 0        |
| 6558 | C | 0.258 | 0.01     |
| 6559 | A | 0.38  | 0.57     |
| 6560 | G | 0.217 | 0.58     |
| 6561 | G | 0.176 | 0.2      |
| 6562 | C | 0.027 | 0.18     |
| 6563 | U | 0.075 | 0.01     |
| 6564 | U | 0.543 | 0.03     |
| 6565 | G | 1.662 | 0.03     |
| 6566 | G | 1.716 | 0.01     |
| 6567 | A | 1.024 | 9.19E-06 |
| 6568 | A | 0.298 | 1.51E-07 |
| 6569 | C | 0.068 | 2.15E-06 |
| 6570 | A | 0.482 | 0        |
| 6571 | A | 0.841 | 0        |
| 6572 | G | 0.692 | 7.24E-06 |
| 6573 | A | 0.427 | 2.64E-06 |
| 6574 | G | 0.176 | 3.13E-07 |
| 6575 | C | 0     | 2.49E-07 |
| 6576 | A | 0.692 | 0        |

|      |   |       |          |
|------|---|-------|----------|
| 6577 | A | 0.631 | 0        |
| 6578 | A | 0.895 | 2.34E-05 |
| 6579 | U | 0.766 | 5.57E-05 |
| 6580 | G | 0.604 | 5.53E-05 |
| 6581 | A | 0.685 | 6.35E-05 |
| 6582 | U | 0.339 | 0        |
| 6583 | A | 1.309 | 0        |
| 6584 | A | 0.515 | 0        |
| 6585 | G | 0     | 0.38     |
| 6586 | C | 0     | 0.78     |
| 6587 | U | 0     | 0.76     |
| 6588 | G | 0.197 | 0.09     |
| 6589 | U | 0     | 0.04     |
| 6590 | A | 0.949 | 0.01     |
| 6591 | A | 0.929 | 0.01     |
| 6592 | A | 0.617 | 0.79     |
| 6593 | U | 0.305 | 0.9      |
| 6594 | U | 0.726 | 0.47     |
| 6595 | C | 0     | 0.07     |
| 6596 | A | 0.956 | 0.08     |
| 6597 | A | 0.651 | 0.09     |
| 6598 | C | 0     | 0.07     |
| 6599 | A | 1.051 | 0.19     |
| 6600 | U | 0.271 | 0.19     |
| 6601 | G | 0.427 | 0.01     |
| 6602 | A | 0.631 | 0.02     |
| 6603 | C | 0.305 | 0.02     |
| 6604 | A | 0.509 | 0.02     |
| 6605 | G | 0.115 | 0.02     |
| 6606 | G | 0.264 | 0.02     |
| 6607 | G | 0     | 0.04     |
| 6608 | U | 0.231 | 0.29     |
| 6609 | U | 0.583 | 0.77     |
| 6610 | A | 1.35  | 0.54     |
| 6611 | A | 0.705 | 0.05     |
| 6612 | A | 1.39  | 0.07     |
| 6613 | A | 0.739 | 0.07     |
| 6614 | A | 1.004 | 0.07     |
| 6615 | G | 0.827 | 0.04     |
| 6616 | A | 0.909 | 0.16     |
| 6617 | G | 0.895 | 0.16     |
| 6618 | A | 0.719 | 0.07     |
| 6619 | C | 0     | 0.57     |

|      |   |       |      |
|------|---|-------|------|
| 6620 | A | 0.678 | 0.55 |
| 6621 | A | 1.099 | 0.07 |
| 6622 | G | 0.244 | 0.02 |
| 6623 | A | 1.261 | 0.04 |
| 6624 | A | 1.478 | 0.04 |
| 6625 | A | 1.343 | 0.01 |
| 6626 | A | 1.261 | 0.01 |
| 6627 | A | 2.17  | 0.01 |
| 6628 | A | 0.285 | 0    |
| 6629 | G | 0.231 | 0    |
| 6630 | A | 0.217 | 0.11 |
| 6631 | G | 0.149 | 0.12 |
| 6632 | U | 0.19  | 0.91 |
| 6633 | A | 0.353 | 0.98 |
| 6634 | C | 0.19  | 0.86 |
| 6635 | A | 0.909 | 0.65 |
| 6636 | A | 0.895 | 0.15 |
| 6637 | U | 0.746 | 0.14 |
| 6638 | G | 1.248 | 0.04 |
| 6639 | A | 0.977 | 0    |
| 6640 | A | 1.153 | 0    |
| 6641 | A | 0.827 | 0.01 |
| 6642 | C | 0.203 | 0.01 |
| 6643 | U | 0.543 | 0.76 |
| 6644 | U | 0.285 | 0.82 |
| 6645 | G | 0.827 | 0.15 |
| 6646 | G | 0.258 | 0.29 |
| 6647 | U | 0.109 | 0.8  |
| 6648 | A | 0.366 | 0.77 |
| 6649 | C | 0.095 | 0.09 |
| 6650 | U | 0.149 | 0.16 |
| 6651 | C | 0     | 0.2  |
| 6652 | U | 0.366 | 0.08 |
| 6653 | G | 1.072 | 0    |
| 6654 | C | 0.42  | 0.3  |
| 6655 | A | 1.248 | 0.31 |
| 6656 | G | 1.18  | 0.13 |
| 6657 | A | 1.18  | 0.23 |
| 6658 | U | 0.461 | 0.21 |
| 6659 | U | 0.258 | 0.2  |
| 6660 | U | 0.19  | 0.43 |
| 6661 | G | 0.285 | 0.43 |
| 6662 | G | 0.244 | 0.07 |

|      |   |       |          |
|------|---|-------|----------|
| 6663 | U | 0.136 | 0.65     |
| 6664 | A | 0.637 | 0.65     |
| 6665 | U | 0.122 | 0.59     |
| 6666 | G | 0.353 | 0.64     |
| 6667 | U | 0.217 | 0.66     |
| 6668 | G | 0.665 | 0.54     |
| 6669 | A | 1.194 | 0.49     |
| 6670 | A | 1.058 | 0.49     |
| 6671 | C | 0.217 | 0        |
| 6672 | A | 0.732 | 7.25E-06 |
| 6673 | A | 0.651 | 9.96E-06 |
| 6674 | G | 0.543 | 8.86E-06 |
| 6675 | G | 0.339 | 1.81E-06 |
| 6676 | G | 0.692 | 4.72E-06 |
| 6677 | A | 0.637 | 4.64E-06 |
| 6678 | A | 1.017 | 1.87E-06 |
| 6679 | U | 0.57  | 6.95E-07 |
| 6680 | A | 0.977 | 7.33E-07 |
| 6681 | A | 0.827 | 1.82E-05 |
| 6682 | C | 0.258 | 0        |
| 6683 | A | 0.515 | 0        |
| 6684 | C | 0.014 | 8.91E-06 |
| 6685 | U | 0.122 | 5.89E-06 |
| 6686 | G | 0     | 0        |
| 6687 | G | 0.054 | 0        |
| 6688 | U | 0.109 | 0        |
| 6689 | A | 0.651 | 0        |
| 6690 | A | 0.637 | 1.04E-05 |
| 6691 | U | 0.461 | 7.44E-06 |
| 6692 | G | 1.438 | 2.89E-06 |
| 6693 | A | 1.519 | 9.65E-06 |
| 6694 | A | 1.912 | 0        |
| 6695 | A | 0.949 | 0        |
| 6696 | G | 0.637 | 0.01     |
| 6697 | U | 0.407 | 0.01     |
| 6698 | A | 0.827 | 0.01     |
| 6699 | G | 0.665 | 0.01     |
| 6700 | A | 1.641 | 0.67     |
| 6701 | U | 0.448 | 0.93     |
| 6702 | G | 0.136 | 0.41     |
| 6703 | U | 0.068 | 0.36     |
| 6704 | U | 0.081 | 0.28     |
| 6705 | A | 0.353 | 0.19     |

|      |   |       |      |
|------|---|-------|------|
| 6706 | C | 0.027 | 0.16 |
| 6707 | A | 0.448 | 0.64 |
| 6708 | U | 0.61  | 0.6  |
| 6709 | G | 1.166 | 0.08 |
| 6710 | A | 1.18  | 0.41 |
| 6711 | A | 1.044 | 0.41 |
| 6712 | C | 0.176 | 0.21 |
| 6713 | C | 0.19  | 0.19 |
| 6714 | A | 1.058 | 0.17 |
| 6715 | C | 0.203 | 0.17 |
| 6716 | U | 0.095 | 0.39 |
| 6717 | G | 0.122 | 0.58 |
| 6718 | U | 0.095 | 0.58 |
| 6719 | A | 0.407 | 0.58 |
| 6720 | A | 0.461 | 0.44 |
| 6721 | C | 0.258 | 0.64 |
| 6722 | A | 0.42  | 0.93 |
| 6723 | C | 0.095 | 0.94 |
| 6724 | U | 0.393 | 0.93 |
| 6725 | U | 0.488 | 0.85 |
| 6726 | C | 0.122 | 0.18 |
| 6727 | U | 0.434 | 0.16 |
| 6728 | G | 0.203 | 0.27 |
| 6729 | U | 0.244 | 0.33 |
| 6730 | U | 0.393 | 0.11 |
| 6731 | A | 0.841 | 0.53 |
| 6732 | U | 0.366 | 0.53 |
| 6733 | C | 0.19  | 0.13 |
| 6734 | C | 0.298 | 0.01 |
| 6735 | A | 0.637 | 0.01 |
| 6736 | A | 0.705 | 0.02 |
| 6737 | G | 0.882 | 0.12 |
| 6738 | A | 0.814 | 0.2  |
| 6739 | G | 0.38  | 0.62 |
| 6740 | U | 0.081 | 0.64 |
| 6741 | C | 0.054 | 0.14 |
| 6742 | U | 1.058 | 0.83 |
| 6743 | U | 0.461 | 0.95 |
| 6744 | G | 0.773 | 0.98 |
| 6745 | U | 0.339 | 0.99 |
| 6746 | G | 0.461 | 0.69 |
| 6747 | A | 0.787 | 0.47 |
| 6748 | C | 0.176 | 0.5  |

|      |   |       |      |
|------|---|-------|------|
| 6749 | A | 0.949 | 0.79 |
| 6750 | A | 0.963 | 0.84 |
| 6751 | A | 0.855 | 0.73 |
| 6752 | C | 0.095 | 0.39 |
| 6753 | A | 0.868 | 0.45 |
| 6754 | U | 0.543 | 0.33 |
| 6755 | U | 0.597 | 0.54 |
| 6756 | A | 1.411 | 0.5  |
| 6757 | U | 0.651 | 0.68 |
| 6758 | U | 0.637 | 0.74 |
| 6759 | G | 0.637 | 0.54 |
| 6760 | G | 0.434 | 0.12 |
| 6761 | G | 0.42  | 0.12 |
| 6762 | A | 0.868 | 0.15 |
| 6763 | U | 0.176 | 0.15 |
| 6764 | G | 0.163 | 0.13 |
| 6765 | C | 0.041 | 0.12 |
| 6766 | U | 0.475 | 0.14 |
| 6767 | A | 0.624 | 0.19 |
| 6768 | U | 0.448 | 0.55 |
| 6769 | U | 0.827 | 0.74 |
| 6770 | A | 0.99  | 0.48 |
| 6771 | G | 0.678 | 0.24 |
| 6772 | A | 0.705 | 0.33 |
| 6773 | U | 0.312 | 0.61 |
| 6774 | U | 0.665 | 0.69 |
| 6775 | U | 0.57  | 0.91 |
| 6776 | A | 1.18  | 0.86 |
| 6777 | G | 0.461 | 0.85 |
| 6778 | G | 0.583 | 0.88 |
| 6779 | U | 0.339 | 0.91 |
| 6780 | A | 0.597 | 0.43 |
| 6781 | U | 0.407 | 0.27 |
| 6782 | U | 0.448 | 0.65 |
| 6783 | G | 0.692 | 0.68 |
| 6784 | U | 0.298 | 0.57 |
| 6785 | G | 0.434 | 0.46 |
| 6786 | C | 0.149 | 0.3  |
| 6787 | A | 0.244 | 0.83 |
| 6788 | C | 0.041 | 0.77 |
| 6789 | C | 0.122 | 0.7  |
| 6790 | U | 0.57  | 0.01 |
| 6791 | C | 0.109 | 0.03 |

|      |   |       |      |
|------|---|-------|------|
| 6792 | C | 0.136 | 0.05 |
| 6793 | A | 0.366 | 0.09 |
| 6794 | G | 0.244 | 0.77 |
| 6795 | G | 0.231 | 0.79 |
| 6796 | U | 0.312 | 0.74 |
| 6797 | U | 0.665 | 0.24 |
| 6798 | A | 1.628 | 0.45 |
| 6799 | U | 0.99  | 0.47 |
| 6800 | G | 0.068 | 0.44 |
| 6801 | C | 0.136 | 0.39 |
| 6802 | U | 0.353 | 0.46 |
| 6803 | U | 0.271 | 0.84 |
| 6804 | U | 0.393 | 0.71 |
| 6805 | G | 0.095 | 0.15 |
| 6806 | C | 0.326 | 0.2  |
| 6807 | U | 1.153 | 0.44 |
| 6808 | U | 0.963 | 0.5  |
| 6809 | A | 0.502 | 0.46 |
| 6810 | G | 0.882 | 0.39 |
| 6811 | A | 0.203 | 0.27 |
| 6812 | U | 0.583 | 0.33 |
| 6813 | G | 0.339 | 0.48 |
| 6814 | U | 0.841 | 0.37 |
| 6815 | A | 0.977 | 0.39 |
| 6816 | A | 0.461 | 0.38 |
| 6817 | U | 0.814 | 0.66 |
| 6818 | G | 0.909 | 0.61 |
| 6819 | A | 0.217 | 0.36 |
| 6820 | C | 0.692 | 0.29 |
| 6821 | A | 0.38  | 0.28 |
| 6822 | C | 1.302 | 0.19 |
| 6823 | A | 0.841 | 0.45 |
| 6824 | A | 1.397 | 0.45 |
| 6825 | A | 1.316 | 0.23 |
| 6826 | U | 0.963 | 0.21 |
| 6827 | U | 1.031 | 0.36 |
| 6828 | A | 0.488 | 0.36 |
| 6829 | U | 0.705 | 0.26 |
| 6830 | U | 0.515 | 0.44 |
| 6831 | C | 0.543 | 0.5  |
| 6832 | A | 0.366 | 0.48 |
| 6833 | G | 0.054 | 0.27 |
| 6834 | G | 0     | 0.25 |

|      |   |       |      |
|------|---|-------|------|
| 6835 | C | 0.475 | 0.26 |
| 6836 | U | 1.085 | 0.38 |
| 6837 | U | 0.787 | 0.45 |
| 6838 | U | 0.895 | 0.33 |
| 6839 | A | 0.732 | 0.38 |
| 6840 | U | 0.217 | 0.33 |
| 6841 | G | 0     | 0.3  |
| 6842 | C |       | 0.42 |
| 6843 | C | 0.312 | 0.43 |
| 6844 | U | 1.289 | 0.41 |
| 6845 | A | 0.963 | 0.43 |
| 6846 | A | 0.936 | 0.43 |
| 6847 | A | 0.244 | 0.43 |
| 6848 | U | 0.353 | 0.46 |
| 6849 | G | 0     | 0.46 |
| 6850 | U | 0.176 | 0.44 |
| 6851 | U | 0.217 | 0.94 |
| 6852 | C | 0.76  | 0.94 |
| 6853 | U | 1.641 | 0.53 |
| 6854 | A | 2.211 | 0.58 |
| 6855 | A | 1.241 | 0.55 |
| 6856 | G | 0.78  | 0.51 |
| 6857 | G | 1.146 | 0.65 |
| 6858 | U | 0.454 | 0.69 |
| 6859 | G | 0.482 | 0.66 |
| 6860 | G | 2.285 | 0.65 |
| 6861 | U | 0.258 | 0.51 |
| 6862 | G | 0.522 | 0.34 |
| 6863 | G | 0.298 | 0.3  |
| 6864 | U | 0.203 | 0.2  |
| 6865 | C | 0.095 | 0.12 |
| 6866 | U | 0.115 | 0.18 |
| 6867 | C | 0.115 | 0.44 |
| 6868 | U | 0.339 | 0.47 |
| 6869 | U | 0.359 | 0.53 |
| 6870 | C | 0.339 | 0.55 |
| 6871 | A | 0.665 | 0.4  |
| 6872 | U | 0.4   | 0.52 |
| 6873 | G | 1.214 | 0.46 |
| 6874 | C | 0.163 | 0.24 |
| 6875 | A | 0.855 | 0.6  |
| 6876 | C | 0.129 | 0.84 |
| 6877 | A | 2.157 | 0.92 |



|      |   |       |      |
|------|---|-------|------|
| 6878 | A | 2.055 | 0.63 |
| 6879 | G | 0.834 | 0.28 |
| 6880 | G | 0.475 | 0.22 |
| 6881 | A | 0.285 | 0.53 |
| 6882 | U | 0.142 | 0.83 |
| 6883 | G | 0.149 | 0.82 |
| 6884 | A | 0.271 | 0.23 |
| 6885 | U | 0.244 | 0.81 |
| 6886 | G | 0.434 | 0.9  |
| 6887 | G | 0.326 | 0.64 |
| 6888 | A | 0.19  | 0.57 |
| 6889 | G | 0.298 | 0.06 |
| 6890 | A | 0.543 | 0.04 |
| 6891 | C | 0.014 | 0.17 |
| 6892 | A | 0.285 | 0.18 |
| 6893 | C | 0.149 | 0.21 |
| 6894 | A | 1.072 | 0.2  |
| 6895 | G | 0.732 | 0.07 |
| 6896 | A | 1.072 | 0.08 |
| 6897 | C | 0.326 | 0.1  |
| 6898 | U | 0.597 | 0.12 |
| 6899 | U | 0.326 | 0.69 |
| 6900 | C | 0.339 | 0.67 |
| 6901 | U | 0.366 | 0.53 |
| 6902 | A | 0.298 | 0.55 |
| 6903 | C | 0.054 | 0.93 |
| 6904 | U | 0.339 | 0.99 |
| 6905 | U | 0.543 | 0.95 |
| 6906 | G | 0.407 | 0.75 |
| 6907 | G | 0.461 | 0.77 |
| 6908 | U | 0.258 | 0.84 |
| 6909 | U | 0.258 | 0.59 |
| 6910 | U | 0.353 | 0.5  |
| 6911 | G | 0.461 | 0.37 |
| 6912 | G | 0.61  | 0.51 |
| 6913 | C | 0.068 | 0.48 |
| 6914 | U | 0.312 | 0.66 |
| 6915 | U | 0.624 | 0.58 |
| 6916 | U | 0.855 | 0.26 |
| 6917 | A | 0.705 | 0.14 |
| 6918 | A | 0.529 | 0.34 |
| 6919 | U | 0.326 | 0.59 |
| 6920 | G | 0.448 | 0.53 |

|      |   |       |      |
|------|---|-------|------|
| 6921 | G | 0.298 | 0.17 |
| 6922 | A | 0.393 | 0.16 |
| 6923 | A | 0.393 | 0.12 |
| 6924 | C | 0.163 | 0.08 |
| 6925 | U | 0.692 | 0.11 |
| 6926 | A | 1.004 | 0.17 |
| 6927 | G | 0.773 | 0.26 |
| 6928 | A | 0.529 | 0.37 |
| 6929 | G | 0.285 | 0.44 |
| 6930 | C | 0     | 0.7  |
| 6931 | A | 0.692 | 0.51 |
| 6932 | G | 0.407 | 0.26 |
| 6933 | A | 0.746 | 0.26 |
| 6934 | A | 0.529 | 0.23 |
| 6935 | A | 0.719 | 0.27 |
| 6936 | A | 0.624 | 0.47 |
| 6937 | U | 0.109 | 0.54 |
| 6938 | A | 0.651 | 0.55 |
| 6939 | G | 0.732 | 0.32 |
| 6940 | A | 0.76  | 0.35 |
| 6941 | A | 0.488 | 0.38 |
| 6942 | C | 0.231 | 0.36 |
| 6943 | U | 0.678 | 0.34 |
| 6944 | U | 0.231 | 0.38 |
| 6945 | A | 1.221 | 0.19 |
| 6946 | U | 0     | 0.48 |
| 6947 | A | 0.61  | 0.42 |
| 6948 | U | 0.19  | 0.6  |
| 6949 | U | 0.76  | 0.55 |
| 6950 | U | 0.624 | 0.86 |
| 6951 | A | 0.339 | 0.9  |
| 6952 | C | 0.136 | 0.93 |
| 6953 | U | 0.149 | 0.95 |
| 6954 | G | 0.041 | 0.93 |
| 6955 | G | 0.041 | 0.85 |
| 6956 | C | 0     | 0.43 |
| 6957 | A | 0.136 | 0.57 |
| 6958 | U | 0.081 | 0.82 |
| 6959 | G | 0.122 | 0.67 |
| 6960 | G | 0.095 | 0.42 |
| 6961 | U | 0.054 | 0.34 |
| 6962 | A | 0     | 0.41 |
| 6963 | G | 0.163 | 0.5  |

|      |   |       |      |
|------|---|-------|------|
| 6964 | G | 0.576 | 0.43 |
| 6965 | G | 0.488 | 0.35 |
| 6966 | A | 0.461 | 0.34 |
| 6967 | U | 0.197 | 0.65 |
| 6968 | A | 1.207 | 0.69 |
| 6969 | A | 0.888 | 0.75 |
| 6970 | U | 0.637 | 0.84 |
| 6971 | A | 1.743 | 0.73 |
| 6972 | G | 0.617 | 0.63 |
| 6973 | G | 0.305 | 0.58 |
| 6974 | A | 0.156 | 0.57 |
| 6975 | C | 0     | 0.58 |
| 6976 | U | 0.088 | 0.65 |
| 6977 | A | 0.353 | 0.7  |
| 6978 | U | 0.285 | 0.71 |
| 6979 | A | 1.18  | 0.62 |
| 6980 | A | 0.624 | 0.71 |
| 6981 | U | 0.488 | 0.71 |
| 6982 | U | 1.173 | 0.58 |
| 6983 | A | 0.692 | 0.61 |
| 6984 | G | 0.488 | 0.6  |
| 6985 | U | 0.115 | 0.65 |
| 6986 | U | 0.427 | 0.98 |
| 6987 | U | 1.173 | 0.98 |
| 6988 | A | 1.37  | 0.92 |
| 6989 | A | 0.841 | 0.51 |
| 6990 | A | 1.16  | 0.58 |
| 6991 | U | 0.543 | 0.56 |
| 6992 | A | 1.546 | 0.48 |
| 6993 | A | 0.753 | 0.39 |
| 6994 | G | 1.139 | 0.51 |
| 6995 | U | 0.332 | 0.77 |
| 6996 | A | 0.644 | 0.82 |
| 6997 | U | 0.136 | 0.65 |
| 6998 | U | 0.081 | 0.82 |
| 6999 | A | 0.563 | 0.58 |
| 7000 | U | 0.393 | 0.72 |
| 7001 | A | 0.922 | 0.3  |
| 7002 | A | 0.637 | 0.29 |
| 7003 | U | 0.115 | 0.26 |
| 7004 | C | 0.122 | 0.36 |
| 7005 | U | 0.434 | 0.42 |
| 7006 | A | 1.017 | 0.23 |

|      |   |       |      |
|------|---|-------|------|
| 7007 | A | 0.726 | 0.37 |
| 7008 | C | 0     | 0.39 |
| 7009 | A | 0.556 | 0.47 |
| 7010 | A | 0.841 | 0.82 |
| 7011 | U | 0.454 | 0.86 |
| 7012 | G | 1.112 | 0.86 |
| 7013 | A | 1.139 | 0.55 |
| 7014 | A | 1.092 | 0.46 |
| 7015 | A | 1.207 | 0.48 |
| 7016 | U | 0.346 | 0.78 |
| 7017 | G | 0.57  | 0.72 |
| 7018 | U | 0.007 | 0.81 |
| 7019 | A | 0.834 | 0.82 |
| 7020 | G | 0.61  | 0.84 |
| 7021 | A | 0.807 | 0.77 |
| 7022 | A | 0.949 | 0.78 |
| 7023 | G | 0.563 | 0.8  |
| 7024 | A | 0.488 | 0.8  |
| 7025 | C | 0.034 | 0.81 |
| 7026 | C | 0.061 | 0.89 |
| 7027 | A | 0.563 | 0.87 |
| 7028 | G | 0.427 | 0.87 |
| 7029 | G | 0.692 | 0.86 |
| 7030 | A | 0.678 | 0.86 |
| 7031 | A | 0.61  | 0.86 |
| 7032 | A | 0.902 | 0.88 |
| 7033 | U | 0.753 | 0.88 |
| 7034 | A | 1.492 | 0.88 |
| 7035 | A | 1.119 | 0.87 |
| 7036 | G | 0.821 | 0.87 |
| 7037 | A | 0.963 | 0.89 |
| 7038 | C | 0.346 | 0.9  |
| 7039 | A | 0.793 | 0.93 |
| 7040 | G | 0.685 | 0.92 |
| 7041 | U | 0.332 | 0.92 |
| 7042 | U | 0.448 | 0.92 |
| 7043 | U | 0.597 | 0.92 |
| 7044 | U | 0.624 | 0.93 |
| 7045 | A | 0.746 | 0.91 |
| 7046 | C | 0.095 | 0.89 |
| 7047 | C | 0.292 | 0.87 |
| 7048 | A | 0.604 | 0.9  |
| 7049 | G | 0.264 | 0.91 |

|      |   |       |      |
|------|---|-------|------|
| 7050 | U | 0.203 | 0.9  |
| 7051 | C | 0.149 | 0.74 |
| 7052 | A | 0.42  | 0.75 |
| 7053 | C | 0.061 | 0.78 |
| 7054 | C | 0.081 | 0.49 |
| 7055 | A | 0.393 | 0.1  |
| 7056 | U | 0.624 | 0.15 |
| 7057 | U | 0.644 | 0.33 |
| 7058 | A | 1.533 | 0.68 |
| 7059 | U | 0.488 | 0.85 |
| 7060 | G | 0.393 | 0.87 |
| 7061 | U | 0.149 | 0.83 |
| 7062 | C | 0.095 | 0.38 |
| 7063 | U | 0.271 | 0.46 |
| 7064 | G | 0.719 | 0.87 |
| 7065 | G | 0.332 | 0.87 |
| 7066 | A | 0.441 | 0.94 |
| 7067 | U | 0.305 | 0.98 |
| 7068 | U | 0.42  | 0.98 |
| 7069 | G | 0.217 | 0.98 |
| 7070 | G | 0.115 | 0.98 |
| 7071 | U | 0.041 | 0.99 |
| 7072 | U | 0.305 | 0.02 |
| 7073 | U | 0.766 | 0.97 |
| 7074 | U | 0.482 | 0.98 |
| 7075 | C | 0.109 | 0.98 |
| 7076 | C | 0.109 | 0.99 |
| 7077 | A | 0.549 | 0.99 |
| 7078 | C | 0.122 | 0.99 |
| 7079 | U | 0.624 | 0.99 |
| 7080 | C | 0.353 | 0.09 |
| 7081 | A | 0.78  | 0.08 |
| 7082 | C | 0.224 | 0.08 |
| 7083 | A | 0.42  | 0.24 |
| 7084 | A | 0.353 | 0.24 |
| 7085 | C | 0     | 0.09 |
| 7086 | C | 0.149 | 0.1  |
| 7087 | A | 0.305 | 0.58 |
| 7088 | A | 0.387 | 0.57 |
| 7089 | U | 0     | 0.18 |
| 7090 | C | 0.441 | 0.03 |
| 7091 | A | 1.757 | 0.1  |
| 7092 | A | 1.533 | 0.1  |

|      |   |       |      |
|------|---|-------|------|
| 7093 | U | 0.726 | 0.04 |
| 7094 | G | 0.875 | 0.06 |
| 7095 | A | 0.78  | 0.12 |
| 7096 | U | 0.78  | 0.16 |
| 7097 | A | 0.936 | 0.35 |
| 7098 | G | 0.454 | 0.6  |
| 7099 | G | 0.02  | 0.69 |
| 7100 | C | 0     | 0.63 |
| 7101 | C | 0.061 | 0.62 |
| 7102 | A | 0.637 | 0.18 |
| 7103 | A | 1.16  | 0.18 |
| 7104 | A | 1.024 | 0.36 |
| 7105 | G | 0.766 | 0.76 |
| 7106 | C | 0.251 | 0.81 |
| 7107 | A | 1.01  | 0.26 |
| 7108 | G | 0.258 | 0.09 |
| 7109 | G | 0.312 | 0.1  |
| 7110 | C | 0.142 | 0.09 |
| 7111 | A | 1.519 | 0.03 |
| 7112 | U | 1.004 | 0.1  |
| 7113 | G | 0.495 | 0.14 |
| 7114 | G | 0.237 | 0.56 |
| 7115 | U | 0.047 | 0.68 |
| 7116 | G | 0.041 | 0.26 |
| 7117 | U | 0.061 | 0.33 |
| 7118 | U | 0.156 | 0.35 |
| 7119 | G | 0.034 | 0.58 |
| 7120 | G | 0.034 | 0.7  |
| 7121 | U | 0.237 | 0.7  |
| 7122 | U | 0.38  | 0.5  |
| 7123 | U | 0.359 | 0.12 |
| 7124 | G | 0.068 | 0.02 |
| 7125 | G | 0.149 | 0.04 |
| 7126 | A | 0.176 | 0.94 |
| 7127 | G | 0.176 | 0.94 |
| 7128 | G | 0.271 | 0.09 |
| 7129 | A | 0.373 | 0.07 |
| 7130 | A | 0.4   | 0.01 |
| 7131 | A | 1.35  | 0.05 |
| 7132 | A | 1.085 | 0.99 |
| 7133 | U | 0.258 | 0.99 |
| 7134 | G | 0.387 | 0.09 |
| 7135 | G | 0.4   | 0.08 |

|      |   |       |      |
|------|---|-------|------|
| 7136 | A | 0.916 | 0.03 |
| 7137 | A | 1.119 | 0    |
| 7138 | G | 0.855 | 0.01 |
| 7139 | G | 0.8   | 0.01 |
| 7140 | A | 0.773 | 0.01 |
| 7141 | U | 0.244 | 0.02 |
| 7142 | G | 0.278 | 0.48 |
| 7143 | C | 1.506 | 0.97 |
| 7144 | A | 0.665 | 0.92 |
| 7145 | A | 1.017 | 0.03 |
| 7146 | U | 1.119 | 0.02 |
| 7147 | A | 1.831 | 0.01 |
| 7148 | A | 2.516 | 0.01 |
| 7149 | A | 0.671 | 0    |
| 7150 | A | 0.359 | 0.33 |
| 7151 | G | 0.17  | 0.34 |
| 7152 | A | 0.136 | 0.03 |
| 7153 | G | 0.061 | 0.65 |
| 7154 | G | 0.258 | 0.7  |
| 7155 | U | 0.014 | 0.53 |
| 7156 | G | 0.292 | 0    |
| 7157 | A | 0.326 | 0    |
| 7158 | A | 0.353 | 0    |
| 7159 | G | 0.312 | 0    |
| 7160 | C | 0.081 | 0    |
| 7161 | A | 0.041 | 0.16 |
| 7162 | G | 0.027 | 0.16 |
| 7163 | A | 0.068 | 0.07 |
| 7164 | C | 0.041 | 0.08 |
| 7165 | C | 0.081 | 0.07 |
| 7166 | A | 0.285 | 0.01 |
| 7167 | U | 0.027 | 0.18 |
| 7168 | U | 0.054 | 0.17 |
| 7169 | G | 0.027 | 0.01 |
| 7170 | U | 0.014 | 0.02 |
| 7171 | C | 0.149 | 0.16 |
| 7172 | A | 0.149 | 0.16 |
| 7173 | A | 0.244 | 0.18 |
| 7174 | A | 0.041 | 0.65 |
| 7175 | C | 0.163 | 0.6  |
| 7176 | A | 0.122 | 0.11 |
| 7177 | U | 0.054 | 0.2  |
| 7178 | C | 0     | 0.32 |

|      |   |       |          |
|------|---|-------|----------|
| 7179 | C | 0.041 | 0.65     |
| 7180 | C | 0.285 | 0.39     |
| 7181 | A | 0.054 | 0.01     |
| 7182 | G | 0     | 0.1      |
| 7183 | G | 0.8   | 0.13     |
| 7184 | U | 0.231 | 0.12     |
| 7185 | A | 0.922 | 0.01     |
| 7186 | U | 0.339 | 0.01     |
| 7187 | A | 0.719 | 0.01     |
| 7188 | C | 0.109 | 0.01     |
| 7189 | U | 0.393 | 0.05     |
| 7190 | G | 0.895 | 0.73     |
| 7191 | G | 0.692 | 0.75     |
| 7192 | A | 0.665 | 0.11     |
| 7193 | A | 0.61  | 0.02     |
| 7194 | C | 0.054 | 0.02     |
| 7195 | U | 0.76  | 0.02     |
| 7196 | A | 1.099 | 0.03     |
| 7197 | A | 0.651 | 0.64     |
| 7198 | C | 0     | 0.73     |
| 7199 | A | 0.393 | 0.1      |
| 7200 | A | 0.407 | 0        |
| 7201 | U | 0.163 | 0        |
| 7202 | A | 0.42  | 0        |
| 7203 | C | 0.081 | 0        |
| 7204 | U | 0.298 | 3.85E-05 |
| 7205 | G | 0.244 | 5.39E-06 |
| 7206 | A | 0.556 | 0        |
| 7207 | U | 0.57  | 0.01     |
| 7208 | A | 1.736 | 0.44     |
| 7209 | A | 1.234 | 0.83     |
| 7210 | A | 1.085 | 0.91     |
| 7211 | A | 0.922 | 0.15     |
| 7212 | U | 0.556 | 0        |
| 7213 | C | 0.475 | 0        |
| 7214 | A | 0.746 | 0.01     |
| 7215 | A | 0.909 | 0        |
| 7216 | U | 0.936 | 0        |
| 7217 | U | 0.922 | 0.94     |
| 7218 | U | 0.312 | 0.98     |
| 7219 | G | 0.244 | 0.4      |
| 7220 | A | 0.339 | 0        |
| 7221 | C | 0.109 | 3.80E-05 |



|      |   |       |          |
|------|---|-------|----------|
| 7222 | G | 0.109 | 1.04E-05 |
| 7223 | G | 0.054 | 5.21E-05 |
| 7224 | C | 0.027 | 0        |
| 7225 | U | 0.014 | 0.05     |
| 7226 | C | 0.014 | 0.14     |
| 7227 | C | 0.041 | 0.11     |
| 7228 | U | 0.231 | 0.01     |
| 7229 | G | 0.922 | 0.01     |
| 7230 | G | 0.882 | 0        |
| 7231 | A | 1.031 | 0        |
| 7232 | G | 0.366 | 0.15     |
| 7233 | G | 0.8   | 0.18     |
| 7234 | A | 0.732 | 0.14     |
| 7235 | G | 0.814 | 0.88     |
| 7236 | G | 0.841 | 0.84     |
| 7237 | A | 0.827 | 0.05     |
| 7238 | G | 1.058 | 0        |
| 7239 | A | 1.397 | 0.02     |
| 7240 | U | 0.285 | 0.03     |
| 7241 | C | 0.095 | 0.04     |
| 7242 | C | 0.068 | 0.03     |
| 7243 | G | 0.244 | 0.08     |
| 7244 | G | 0.407 | 0.85     |
| 7245 | A | 0.8   | 0.83     |
| 7246 | A | 0.787 | 0.06     |
| 7247 | G | 0.475 | 0.03     |
| 7248 | U | 0.529 | 0.03     |
| 7249 | U | 0.624 | 0        |
| 7250 | A | 0.99  | 0        |
| 7251 | C | 0.041 | 0        |
| 7252 | C | 0.014 | 0.75     |
| 7253 | U | 0.068 | 0.82     |
| 7254 | U | 0.231 | 0.33     |
| 7255 | C | 0.339 | 0.31     |
| 7256 | A | 0.448 | 0.31     |
| 7257 | U | 0.203 | 0.28     |
| 7258 | G | 0.271 | 0.57     |
| 7259 | U | 0.095 | 0.55     |
| 7260 | G | 0.149 | 0.27     |
| 7261 | G | 0.217 | 0.22     |
| 7262 | A | 0.705 | 0.15     |
| 7263 | C | 1.228 | 0.14     |
| 7264 | A | 1.017 | 0.23     |

|      |   |       |      |
|------|---|-------|------|
| 7265 | A | 0.712 | 0.25 |
| 7266 | A | 0.726 | 0.2  |
| 7267 | U | 0.515 | 0.25 |
| 7268 | U | 0.346 | 0.61 |
| 7269 | G | 0.244 | 0.64 |
| 7270 | C | 0.387 | 0.62 |
| 7271 | A | 0.787 | 0.85 |
| 7272 | G | 0.99  | 0.81 |
| 7273 | A | 1.139 | 0.87 |
| 7274 | G | 1.35  | 0.92 |
| 7275 | G | 0.556 | 0.91 |
| 7276 | A | 0.509 | 0.85 |
| 7277 | G | 1.316 | 0.06 |
| 7278 | A | 1.051 | 0.02 |
| 7279 | G | 0.488 | 0.06 |
| 7280 | U | 0.597 | 0.06 |
| 7281 | U | 0.156 | 0.8  |
| 7282 | C | 0.041 | 0.88 |
| 7283 | C | 0.075 | 0.92 |
| 7284 | U | 0.061 | 0.96 |
| 7285 | C | 0.081 | 0.67 |
| 7286 | U | 0.339 | 0.91 |
| 7287 | A | 0.454 | 0.76 |
| 7288 | C | 0.156 | 0.4  |
| 7289 | U | 0.156 | 0.63 |
| 7290 | G | 0.454 | 0.73 |
| 7291 | U | 0.305 | 0.7  |
| 7292 | A | 0.943 | 0.67 |
| 7293 | A | 0.807 | 0.37 |
| 7294 | A | 0.821 | 0.48 |
| 7295 | A | 0.861 | 0.57 |
| 7296 | U | 0.882 | 0.59 |
| 7297 | G | 1.336 | 0.55 |
| 7298 | A | 1.126 | 0.59 |
| 7299 | A | 1.282 | 0.58 |
| 7300 | U | 0.366 | 0.57 |
| 7301 | U | 0.034 | 0.69 |
| 7302 | G | 0.102 | 0.72 |
| 7303 | G | 0.041 | 0.79 |
| 7304 | U | 0.102 | 0.81 |
| 7305 | U | 0.115 | 0.84 |
| 7306 | U | 0.054 | 0.6  |
| 7307 | C | 0.631 | 0.56 |

|      |   |       |          |
|------|---|-------|----------|
| 7308 | U | 1.35  | 0.11     |
| 7309 | A | 1.076 | 0.07     |
| 7310 | A | 0.983 | 0.39     |
| 7311 | A | 1.038 | 0.39     |
| 7312 | U | 0.59  | 0.35     |
| 7313 | U | 0.373 | 0.37     |
| 7314 | G | 0.068 | 0.8      |
| 7315 | G | 0.102 | 0.72     |
| 7316 | G | 0.258 | 0.89     |
| 7317 | U | 0.115 | 0.78     |
| 7318 | A | 0.176 | 0.82     |
| 7319 | G | 0.285 | 0.81     |
| 7320 | A | 0.685 | 0.76     |
| 7321 | A | 0.57  | 0        |
| 7322 | G | 0.522 | 0        |
| 7323 | A | 0.787 | 0        |
| 7324 | U | 0.658 | 0        |
| 7325 | A | 0.624 | 0        |
| 7326 | G | 0.393 | 0        |
| 7327 | G | 0.8   | 3.36E-05 |
| 7328 | A | 0.766 | 2.88E-05 |
| 7329 | A | 0.821 | 2.20E-05 |
| 7330 | U | 0.563 | 1.00E-06 |
| 7331 | A | 0.597 | 0        |
| 7332 | C | 0.298 | 0        |
| 7333 | A | 0.637 | 0        |
| 7334 | G | 0.556 | 0        |
| 7335 | C | 0.034 | 0        |
| 7336 | U | 0.251 | 4.90E-05 |
| 7337 | A | 0.292 | 0        |
| 7338 | A | 0.197 | 0.01     |
| 7339 | C | 0.081 | 0.64     |
| 7340 | C | 0.855 | 0.85     |
| 7341 | A | 0.251 | 0.39     |
| 7342 | G | 0.353 | 0.05     |
| 7343 | A | 0.482 | 0.04     |
| 7344 | A | 0.292 | 0.05     |
| 7345 | G | 0.068 | 0.4      |
| 7346 | C | 0.068 | 0.41     |
| 7347 | C | 0.129 | 0.13     |
| 7348 | A | 0.258 | 0.04     |
| 7349 | A | 0.38  | 0.07     |
| 7350 | A | 0.827 | 0.23     |

|      |   |       |      |
|------|---|-------|------|
| 7351 | G | 0.712 | 0.3  |
| 7352 | G | 0.827 | 0.34 |
| 7353 | A | 0.821 | 0.32 |
| 7354 | A | 0.597 | 0.04 |
| 7355 | C | 0.631 | 0.07 |
| 7356 | A | 0.766 | 0.17 |
| 7357 | G | 0.448 | 0.3  |
| 7358 | C | 0.502 | 0.29 |
| 7359 | A | 1.343 | 0.22 |
| 7360 | U | 0.909 | 0.24 |
| 7361 | A | 1.472 | 0.2  |
| 7362 | A | 0.916 | 0.19 |
| 7363 | A | 1.092 | 0.19 |
| 7364 | A | 1.078 | 0.19 |
| 7365 | G | 0.868 | 0.62 |
| 7366 | G | 0.916 | 0.64 |
| 7367 | A | 0.909 | 0.89 |
| 7368 | A | 0.78  | 0.84 |
| 7369 | U | 0.549 | 0.87 |
| 7370 | U | 1.255 | 0.89 |
| 7371 | A | 1.16  | 0.65 |
| 7372 | C | 0.536 | 0.97 |
| 7373 | G | 0.359 | 0.98 |
| 7374 | U | 0.149 | 0.94 |
| 7375 | G | 0.068 | 0.86 |
| 7376 | C | 0.02  | 0.88 |
| 7377 | C | 0.156 | 0.88 |
| 7378 | A | 0.4   | 0.89 |
| 7379 | U | 0.203 | 0.99 |
| 7380 | G | 0.095 | 0.9  |
| 7381 | U | 0.122 | 0.14 |
| 7382 | C | 0.244 | 0.14 |
| 7383 | A | 1.051 | 0.41 |
| 7384 | U | 0.678 | 0.42 |
| 7385 | A | 0.888 | 0.48 |
| 7386 | U | 0.454 | 0.5  |
| 7387 | U | 0.97  | 0.12 |
| 7388 | A | 1.166 | 0.1  |
| 7389 | G | 0.678 | 0.04 |
| 7390 | A | 0.983 | 0.05 |
| 7391 | C | 0.515 | 0.04 |
| 7392 | A | 0.922 | 0.04 |
| 7393 | A | 0.787 | 0.02 |

|      |   |       |      |
|------|---|-------|------|
| 7394 | A | 2.285 | 0.29 |
| 7395 | U | 0.712 | 0.38 |
| 7396 | A | 0.753 | 0.19 |
| 7397 | A | 0.821 | 0.45 |
| 7398 | U | 0.604 | 0.52 |
| 7399 | C | 1.16  | 0.11 |
| 7400 | A | 0.753 | 0.05 |
| 7401 | A | 0.963 | 0.01 |
| 7402 | C | 0.827 | 0.63 |
| 7403 | A | 0.502 | 0.63 |
| 7404 | C | 0.237 | 0.13 |
| 7405 | U | 0.237 | 0.17 |
| 7406 | U | 0.237 | 0.84 |
| 7407 | G | 0.285 | 0.93 |
| 7408 | G | 0.278 | 0.93 |
| 7409 | C | 0.373 | 0.89 |
| 7410 | A | 0.522 | 0.92 |
| 7411 | U | 0.726 | 0.82 |
| 7412 | A | 1.811 | 0.82 |
| 7413 | A | 1.682 | 0.57 |
| 7414 | A | 1.309 | 0.81 |
| 7415 | G | 1.112 | 0.81 |
| 7416 | U | 1.662 | 0.84 |
| 7417 | A | 0.882 | 0.76 |
| 7418 | G | 0.332 | 0.17 |
| 7419 | G | 0.454 | 0.15 |
| 7420 | C | 0.57  | 0.02 |
| 7421 | A | 0.841 | 0.06 |
| 7422 | A | 0.678 | 0.1  |
| 7423 | A | 0.685 | 0.93 |
| 7424 | A | 1.207 | 0.94 |
| 7425 | A | 1.499 | 0.85 |
| 7426 | U | 1.112 | 0.72 |
| 7427 | G | 0.787 | 0    |
| 7428 | U | 0.482 | 0    |
| 7429 | U | 0.59  | 0    |
| 7430 | U | 1.017 | 0.02 |
| 7431 | A | 0.949 | 0.73 |
| 7432 | U | 0.251 | 0.92 |
| 7433 | U | 0.237 | 0.99 |
| 7434 | U | 0.285 | 0.93 |
| 7435 | G | 0.217 | 0.01 |
| 7436 | C | 0.075 | 0.12 |

|      |   |       |      |
|------|---|-------|------|
| 7437 | C | 0.156 | 0.17 |
| 7438 | U | 0.156 | 0.15 |
| 7439 | C | 0.712 | 0.22 |
| 7440 | C | 0.597 | 0.21 |
| 7441 | A | 1.166 | 0.14 |
| 7442 | A | 0.651 | 0.12 |
| 7443 | G | 0.888 | 0.05 |
| 7444 | A | 1.716 | 0.02 |
| 7445 | G | 0.712 | 0.06 |
| 7446 | A | 0.373 | 0.05 |
| 7447 | G | 0.488 | 0.29 |
| 7448 | G | 0.312 | 0.45 |
| 7449 | G | 0.448 | 0.21 |
| 7450 | A | 0.271 | 0.08 |
| 7451 | G | 0.271 | 0.07 |
| 7452 | A | 0.095 | 0.02 |
| 7453 | C | 0.027 | 0.02 |
| 7454 | C | 0.19  | 0.36 |
| 7455 | U | 0.57  | 0.44 |
| 7456 | C | 0.746 | 0.12 |
| 7457 | A | 0.326 | 0.01 |
| 7458 | C | 0.353 | 0.03 |
| 7459 | G | 0.231 | 0.66 |
| 7460 | U | 0.42  | 0.95 |
| 7461 | G | 0.76  | 0.88 |
| 7462 | U | 0.827 | 0.04 |
| 7463 | A | 0.543 | 0.01 |
| 7464 | A | 0.326 | 0.02 |
| 7465 | C | 0.163 | 0.02 |
| 7466 | U | 0.136 | 0.02 |
| 7467 | C | 0.027 | 0.09 |
| 7468 | C | 0.136 | 0.11 |
| 7469 | A | 0.231 | 0.06 |
| 7470 | C | 1.139 | 0.82 |
| 7471 | A | 1.072 | 0.92 |
| 7472 | G | 0.543 | 0.78 |
| 7473 | U | 0.597 | 0.17 |
| 7474 | G | 1.695 | 0.15 |
| 7475 | A | 0.041 | 0.13 |
| 7476 | C | 0.163 | 0    |
| 7477 | C | 0.217 | 0.01 |
| 7478 | A | 0.136 | 0.02 |
| 7479 | G | 0.054 | 0.15 |

|      |   |       |          |
|------|---|-------|----------|
| 7480 | U | 0.109 | 0.16     |
| 7481 | C | 0.312 | 0.15     |
| 7482 | U | 0.136 | 0.16     |
| 7483 | C | 0.488 | 0.15     |
| 7484 | A | 0.434 | 0.21     |
| 7485 | U | 1.289 | 0.21     |
| 7486 | A | 0.732 | 0.29     |
| 7487 | G | 0.529 | 0.28     |
| 7488 | C | 0.922 | 0.14     |
| 7489 | A | 1.37  | 0.01     |
| 7490 | A | 1.058 | 0.02     |
| 7491 | A | 0.678 | 0.01     |
| 7492 | C | 1.085 | 0.04     |
| 7493 | A | 0.787 | 0.1      |
| 7494 | U | 1.356 | 0.08     |
| 7495 | A | 1.085 | 0.02     |
| 7496 | G | 0.624 | 0.02     |
| 7497 | A | 0.217 | 0.02     |
| 7498 | U | 0.285 | 0.01     |
| 7499 | U | 0.203 | 1.10E-05 |
| 7500 | G | 0.149 | 0        |
| 7501 | G | 0.787 | 0        |
| 7502 | A | 0.692 | 0        |
| 7503 | U | 0.597 | 0        |
| 7504 | U | 0.882 | 0        |
| 7505 | G | 1.139 | 0        |
| 7506 | A | 0.434 | 9.76E-07 |
| 7507 | U | 0.814 | 9.71E-07 |
| 7508 | G | 0.787 | 3.50E-06 |
| 7509 | G | 1.37  | 0        |
| 7510 | A | 0.949 | 0        |
| 7511 | A | 0.692 | 0        |
| 7512 | A | 0.258 | 0        |
| 7513 | C | 0.353 | 0        |
| 7514 | C | 0.719 | 0.01     |
| 7515 | A | 0.963 | 0.45     |
| 7516 | A | 0.814 | 0.92     |
| 7517 | A | 0.285 | 0.84     |
| 7518 | C | 0.583 | 0.2      |
| 7519 | U | 0.936 | 0.19     |
| 7520 | A | 1.655 | 0.17     |
| 7521 | A | 1.207 | 0.03     |
| 7522 | U | 1.865 | 0.07     |

|      |   |       |      |
|------|---|-------|------|
| 7523 | A | 0.753 | 0.19 |
| 7524 | U | 0.977 | 0.18 |
| 7525 | C | 0.427 | 0.66 |
| 7526 | A | 0.142 | 0.73 |
| 7527 | C | 0.068 | 0.42 |
| 7528 | C | 0.061 | 0.36 |
| 7529 | A | 0.102 | 0.44 |
| 7530 | U | 0.203 | 0.74 |
| 7531 | G | 1.695 | 0.66 |
| 7532 | A | 0.054 | 0.53 |
| 7533 | G | 0.237 | 0.87 |
| 7534 | U | 0.176 | 0.91 |
| 7535 | G | 0.095 | 0.79 |
| 7536 | C | 0.115 | 0.92 |
| 7537 | A | 0.19  | 0.9  |
| 7538 | G | 0.142 | 0.7  |
| 7539 | A | 0.136 | 0.18 |
| 7540 | G | 0.027 | 0.26 |
| 7541 | G | 0.271 | 0.72 |
| 7542 | U | 0.095 | 0.88 |
| 7543 | G | 0.095 | 0.84 |
| 7544 | G | 0.305 | 0.72 |
| 7545 | C | 0.095 | 0.8  |
| 7546 | A | 0.176 | 0.8  |
| 7547 | G | 0.61  | 0.74 |
| 7548 | A | 0.529 | 0.58 |
| 7549 | A | 0.203 | 0.48 |
| 7550 | C | 0.19  | 0.76 |
| 7551 | U | 0.414 | 0.75 |
| 7552 | G | 0.529 | 0.47 |
| 7553 | U | 0.943 | 0.54 |
| 7554 | A | 0.617 | 0.48 |
| 7555 | U | 0.441 | 0.31 |
| 7556 | C | 0.59  | 0.31 |
| 7557 | G | 0.427 | 0.42 |
| 7558 | A | 0.312 | 0.41 |
| 7559 | U | 0.319 | 0.59 |
| 7560 | U | 0.631 | 0.71 |
| 7561 | G | 0.719 | 0.73 |
| 7562 | G | 0.719 | 0.58 |
| 7563 | A | 0.509 | 0.46 |
| 7564 | A | 0.543 | 0.57 |
| 7565 | U | 0.414 | 0.78 |



|      |   |       |      |
|------|---|-------|------|
| 7566 | U | 0.522 | 0.83 |
| 7567 | G | 0.468 | 0.81 |
| 7568 | G | 0.746 | 0.68 |
| 7569 | G | 0.719 | 0.7  |
| 7570 | A | 0.502 | 0.71 |
| 7571 | G | 0.448 | 0.65 |
| 7572 | A | 0.366 | 0.6  |
| 7573 | U | 0.827 | 0.62 |
| 7574 | U | 1.004 | 0.65 |
| 7575 | A | 0.631 | 0.64 |
| 7576 | U | 1.431 | 0.65 |
| 7577 | A | 1.004 | 0.64 |
| 7578 | A | 0.685 | 0.88 |
| 7579 | A | 0.536 | 0.89 |
| 7580 | U | 0.76  | 0.92 |
| 7581 | U | 1.207 | 0.9  |
| 7582 | A | 0.699 | 0.56 |
| 7583 | G | 0.509 | 0.35 |
| 7584 | U | 1.099 | 0.69 |
| 7585 | A | 1.092 | 0.49 |
| 7586 | G | 1.831 | 0.82 |
| 7587 | A | 0.658 | 0.26 |
| 7588 | G | 0.258 | 0.42 |
| 7589 | A | 0.387 | 0.29 |
| 7590 | U | 0.292 | 0.52 |
| 7591 | C | 0.224 | 0.48 |
| 7592 | A | 0.387 | 0.43 |
| 7593 | C | 0.149 | 0.34 |
| 7594 | U | 0.407 | 0.42 |
| 7595 | C | 0.258 | 0.64 |
| 7596 | C | 0.4   | 0.74 |
| 7597 | A | 0.461 | 0.85 |
| 7598 | A | 0.353 | 0.89 |
| 7599 | U | 0.529 | 0.95 |
| 7600 | U | 1.234 | 0.96 |
| 7601 | G | 0.163 | 0.81 |
| 7602 | G | 0.217 | 0.73 |
| 7603 | C | 0.149 | 0.77 |
| 7604 | U | 0.583 | 0.8  |
| 7605 | U | 1.112 | 0.69 |
| 7606 | G | 1.546 | 0.72 |
| 7607 | G | 0.136 | 0.73 |
| 7608 | C | 0.122 | 0.77 |

|      |   |       |      |
|------|---|-------|------|
| 7609 | C | 0.122 | 0.78 |
| 7610 | C | 0.136 | 0.77 |
| 7611 | C | 0.136 | 0.7  |
| 7612 | C | 0.19  | 0.66 |
| 7613 | A | 0.461 | 0.59 |
| 7614 | C | 0.841 | 0.78 |
| 7615 | A | 0.665 | 0.8  |
| 7616 | G | 0.597 | 0.75 |
| 7617 | A | 0.719 | 0.74 |
| 7618 | U | 0.936 | 0.99 |
| 7619 | G | 1.072 | 0.98 |
| 7620 | U | 1.383 | 0.32 |
| 7621 | G | 0.773 | 0.13 |
| 7622 | A | 0.8   | 0.47 |
| 7623 | A | 1.078 | 0.47 |
| 7624 | G | 0.156 | 0.02 |
| 7625 | A | 0.197 | 0.27 |
| 7626 | G | 0.129 | 0.27 |
| 7627 | G | 0.095 | 0.02 |
| 7628 | U | 0.156 | 0.6  |
| 7629 | A | 0.17  | 0.61 |
| 7630 | C | 0.115 | 0.82 |
| 7631 | A | 0.068 | 0.8  |
| 7632 | C | 0.136 | 0.11 |
| 7633 | U | 0.332 | 0.67 |
| 7634 | A | 0.895 | 0.77 |
| 7635 | C | 0.244 | 0.93 |
| 7636 | U | 0.495 | 0.91 |
| 7637 | G | 0.387 | 0.7  |
| 7638 | G | 0.244 | 0.7  |
| 7639 | U | 0.122 | 0.74 |
| 7640 | G | 0.068 | 0.75 |
| 7641 | G | 0.095 | 0.73 |
| 7642 | C | 0.217 | 0.72 |
| 7643 | A | 0.122 | 0.71 |
| 7644 | C | 0.244 | 0.71 |
| 7645 | C | 0.19  | 0.73 |
| 7646 | U | 0.109 | 0.73 |
| 7647 | C | 0.122 | 0.73 |
| 7648 | A | 0.651 | 0.88 |
| 7649 | A | 0.705 | 0.94 |
| 7650 | G | 0.57  | 0.9  |
| 7651 | A | 0.617 | 0.33 |

|      |   |       |      |
|------|---|-------|------|
| 7652 | A | 0.746 | 0.27 |
| 7653 | A | 1.112 | 0.58 |
| 7654 | U | 1.397 | 0.68 |
| 7655 | A | 1.051 | 0.56 |
| 7656 | A | 0.746 | 0.25 |
| 7657 | A | 0.726 | 0.19 |
| 7658 | A | 0.773 | 0.16 |
| 7659 | G | 0.529 | 0.2  |
| 7660 | A | 0.977 | 0.65 |
| 7661 | G | 0.115 | 0.76 |
| 7662 | G | 0.115 | 0.8  |
| 7663 | G | 0.17  | 0.88 |
| 7664 | G | 1.363 | 0.86 |
| 7665 | U | 0.203 | 0.86 |
| 7666 | C | 0.319 | 0.76 |
| 7667 | U | 1.16  | 0.75 |
| 7668 | U | 0.929 | 0.87 |
| 7669 | U | 0.387 | 0.92 |
| 7670 | G | 0.393 | 0.98 |
| 7671 | U | 0.326 | 0.99 |
| 7672 | G | 0.203 | 0.99 |
| 7673 | C | 0.115 | 0.94 |
| 7674 | U | 0.76  | 0.79 |
| 7675 | A | 1.275 | 0.77 |
| 7676 | G | 0.943 | 0.73 |
| 7677 | G | 0.19  | 0.86 |
| 7678 | G | 0.197 | 0.87 |
| 7679 | U | 0.109 | 0.94 |
| 7680 | U | 0.129 | 0.91 |
| 7681 | C | 0.136 | 0.9  |
| 7682 | U | 0.149 | 0.96 |
| 7683 | U | 1.044 | 0.97 |
| 7684 | G | 0.454 | 0.95 |
| 7685 | G | 0.176 | 0.97 |
| 7686 | G | 0.244 | 0.91 |
| 7687 | U | 0.102 | 0.69 |
| 7688 | U | 0.556 | 0.96 |
| 7689 | U | 0.285 | 0.99 |
| 7690 | U | 0.149 | 0.99 |
| 7691 | C | 0.19  | 1    |
| 7692 | U | 0.109 | 0.98 |
| 7693 | C | 0.305 | 0.82 |
| 7694 | G | 0.19  | 0.56 |

|      |   |       |          |
|------|---|-------|----------|
| 7695 | C | 1.343 | 0.1      |
| 7696 | A | 1.112 | 0.14     |
| 7697 | A | 0.665 | 0.74     |
| 7698 | C | 0.305 | 0.81     |
| 7699 | G | 0.644 | 1        |
| 7700 | G | 0.163 | 1        |
| 7701 | C | 0.251 | 1        |
| 7702 | A | 0.176 | 0.99     |
| 7703 | G | 0.197 | 0.87     |
| 7704 | G | 0.841 | 0.11     |
| 7705 | U | 0.522 | 0.11     |
| 7706 | U | 0.475 | 0.1      |
| 7707 | C | 0.183 | 0.95     |
| 7708 | U | 0.136 | 0.99     |
| 7709 | G | 0.414 | 0.99     |
| 7710 | C | 0.359 | 0.99     |
| 7711 | A | 0.821 | 0.9      |
| 7712 | A | 1.519 | 0.08     |
| 7713 | U | 0.536 | 0.85     |
| 7714 | G | 0.109 | 0.96     |
| 7715 | G | 0.129 | 0.95     |
| 7716 | G | 0.231 | 0.95     |
| 7717 | C | 0.285 | 0.83     |
| 7718 | G | 0.102 | 0.84     |
| 7719 | C | 0.081 | 0.98     |
| 7720 | G | 0.176 | 0.98     |
| 7721 | G | 0.264 | 0.97     |
| 7722 | C | 0.414 | 0.99     |
| 7723 | G | 0.793 | 0.98     |
| 7724 | U | 0.217 | 0.9      |
| 7725 | C | 1.519 | 0        |
| 7726 | G | 0.326 | 9.40E-05 |
| 7727 | U | 0.041 | 0        |
| 7728 | U | 0.868 | 0        |
| 7729 | G | 0.19  | 0        |
| 7730 | A | 0.041 | 0.9      |
| 7731 | C | 0.081 | 0.98     |
| 7732 | G | 0     | 0.99     |
| 7733 | C | 0.136 | 0.97     |
| 7734 | U | 0.109 | 0.98     |
| 7735 | G | 0.19  | 0.99     |
| 7736 | A | 1.207 | 0.84     |
| 7737 | C | 0.475 | 0.06     |

|      |   |       |      |
|------|---|-------|------|
| 7738 | C | 0.19  | 0.06 |
| 7739 | G | 0.149 | 0.83 |
| 7740 | C | 0.081 | 0.92 |
| 7741 | U | 0.163 | 0.93 |
| 7742 | C | 0.231 | 0.93 |
| 7743 | A | 0.719 | 0.84 |
| 7744 | G | 0.217 | 0.21 |
| 7745 | U | 0.353 | 0.87 |
| 7746 | C | 0.149 | 0.91 |
| 7747 | C | 0.109 | 0.91 |
| 7748 | C | 0.041 | 0.91 |
| 7749 | G | 0.637 | 0.85 |
| 7750 | A | 0.285 | 0.8  |
| 7751 | A | 0.217 | 0.39 |
| 7752 | C | 0.068 | 0.34 |
| 7753 | U | 0.61  | 0.11 |
| 7754 | U | 1.519 | 0.03 |
| 7755 | U | 0.529 | 0.05 |
| 7756 | A | 0.57  | 0.06 |
| 7757 | U | 1.153 | 0.18 |
| 7758 | U | 0.353 | 0.14 |
| 7759 | G | 0.326 | 0.31 |
| 7760 | G | 0.122 | 0.32 |
| 7761 | C | 0.081 | 0.74 |
| 7762 | U | 0.231 | 0.85 |
| 7763 | G | 0.217 | 0.89 |
| 7764 | G | 0.244 | 0.9  |
| 7765 | G | 0.176 | 0.91 |
| 7766 | A | 0.407 | 0.87 |
| 7767 | U | 0.461 | 0.19 |
| 7768 | A | 2.536 | 0.08 |
| 7769 | G | 1.397 | 0.07 |
| 7770 | U | 0.434 | 0.89 |
| 7771 | G | 0.149 | 0.99 |
| 7772 | C | 0.244 | 0.99 |
| 7773 | A | 0.529 | 0.98 |
| 7774 | G | 0.475 | 0.92 |
| 7775 | C | 0.081 | 0.87 |
| 7776 | A | 0.136 | 0.98 |
| 7777 | A | 0.163 | 1    |
| 7778 | C | 0.109 | 1    |
| 7779 | A | 0.122 | 1    |
| 7780 | G | 0.109 | 1    |

|      |   |       |      |
|------|---|-------|------|
| 7781 | C | 0.122 | 0.97 |
| 7782 | A | 0.61  | 0    |
| 7783 | A | 1.37  | 0    |
| 7784 | C | 0.732 | 0    |
| 7785 | A | 1.099 | 0    |
| 7786 | G | 0.081 | 0.97 |
| 7787 | C | 0.122 | 1    |
| 7788 | U | 0.109 | 1    |
| 7789 | G | 0.041 | 1    |
| 7790 | U | 0.258 | 1    |
| 7791 | U | 0.109 | 0.98 |
| 7792 | G | 0.136 | 0.86 |
| 7793 | G | 0.922 | 0.58 |
| 7794 | A | 0.665 | 0.64 |
| 7795 | C | 0     | 0.58 |
| 7796 | G | 1.668 | 0.13 |
| 7797 | U | 0.814 | 0.1  |
| 7798 | G | 0.163 | 0.48 |
| 7799 | G | 0.203 | 0.79 |
| 7800 | U | 0.298 | 0.97 |
| 7801 | C | 0.285 | 0.96 |
| 7802 | A | 0.407 | 0.46 |
| 7803 | A | 0.475 | 0.01 |
| 7804 | G | 0.407 | 0.01 |
| 7805 | A | 0.488 | 0.1  |
| 7806 | G | 0.556 | 0.28 |
| 7807 | A | 1.275 | 0.19 |
| 7808 | C | 0.041 | 0.97 |
| 7809 | A | 0.217 | 0.98 |
| 7810 | A | 0.231 | 0.99 |
| 7811 | C | 0.19  | 0.99 |
| 7812 | A | 0.556 | 0.87 |
| 7813 | A | 0.977 | 0    |
| 7814 | G | 1.492 | 0    |
| 7815 | A | 1.668 | 0    |
| 7816 | A | 1.655 | 0    |
| 7817 | U | 1.004 | 0    |
| 7818 | U | 0.448 | 0.87 |
| 7819 | G | 0.149 | 0.99 |
| 7820 | U | 0.149 | 1    |
| 7821 | U | 0.637 | 0.99 |
| 7822 | G | 0.149 | 0.93 |
| 7823 | C | 0.203 | 0.07 |

|      |   |       |          |
|------|---|-------|----------|
| 7824 | G | 0.38  | 0.27     |
| 7825 | A | 0.38  | 0.25     |
| 7826 | C | 0     | 0.34     |
| 7827 | U | 0.163 | 0.89     |
| 7828 | G | 0.163 | 0.93     |
| 7829 | A | 0.353 | 0.92     |
| 7830 | C | 0.136 | 0.87     |
| 7831 | C | 2.048 | 0.48     |
| 7832 | G | 0.109 | 0.88     |
| 7833 | U | 0.027 | 0.98     |
| 7834 | C | 0.298 | 1        |
| 7835 | U | 0.217 | 0.99     |
| 7836 | G | 0.095 | 0.99     |
| 7837 | G | 0.081 | 0.98     |
| 7838 | G | 0.068 | 0.95     |
| 7839 | G | 0.203 | 0.91     |
| 7840 | A | 1.058 | 0.02     |
| 7841 | A | 0.787 | 0        |
| 7842 | C | 0.556 | 0        |
| 7843 | A | 1.424 | 0        |
| 7844 | A | 2.007 | 7.80E-05 |
| 7845 | A | 1.139 | 8.50E-05 |
| 7846 | G | 0.868 | 5.70E-05 |
| 7847 | A | 0.922 | 0        |
| 7848 | A | 0.529 | 0.01     |
| 7849 | C | 0.339 | 0.59     |
| 7850 | C | 0.909 | 0.92     |
| 7851 | U | 0.176 | 0.39     |
| 7852 | C | 0.054 | 0.97     |
| 7853 | C | 0     | 0.99     |
| 7854 | A | 0.787 | 0.99     |
| 7855 | G | 1.465 | 0.99     |
| 7856 | A | 0.8   | 0.97     |
| 7857 | C | 0.434 | 0.84     |
| 7858 | U | 1.322 | 0.01     |
| 7859 | A | 3.35  | 0.02     |
| 7860 | G | 1.228 | 0.03     |
| 7861 | G | 1.295 | 0.08     |
| 7862 | G | 0.129 | 0.81     |
| 7863 | U | 0.041 | 0.93     |
| 7864 | C | 0.414 | 0.91     |
| 7865 | A | 0.217 | 0.32     |
| 7866 | C | 0.102 | 0.88     |

|      |   |       |      |
|------|---|-------|------|
| 7867 | U | 0.197 | 1    |
| 7868 | G | 0.054 | 1    |
| 7869 | C | 0.068 | 1    |
| 7870 | C | 0.142 | 1    |
| 7871 | A | 0.359 | 0.81 |
| 7872 | U | 0.393 | 0.74 |
| 7873 | C | 0.332 | 0.7  |
| 7874 | G | 0.346 | 0.92 |
| 7875 | A | 0.319 | 0.98 |
| 7876 | G | 0.292 | 1    |
| 7877 | A | 0.387 | 0.99 |
| 7878 | A | 0.407 | 0.99 |
| 7879 | G | 1.289 | 0.96 |
| 7880 | U | 0.387 | 0.37 |
| 7881 | A | 0.353 | 0.33 |
| 7882 | C | 0.122 | 0.91 |
| 7883 | U | 0.454 | 0.97 |
| 7884 | U | 0.739 | 0.95 |
| 7885 | A | 2.041 | 0.87 |
| 7886 | A | 0.637 | 0.82 |
| 7887 | A | 0.59  | 0.77 |
| 7888 | G | 0.556 | 0.89 |
| 7889 | G | 0.4   | 0.9  |
| 7890 | A | 0.271 | 0.93 |
| 7891 | C | 0.081 | 0.92 |
| 7892 | C | 0.068 | 0.86 |
| 7893 | A | 0.509 | 0.81 |
| 7894 | G | 0.339 | 0.82 |
| 7895 | G | 0.054 | 0.79 |
| 7896 | C | 0.244 | 0.99 |
| 7897 | G | 0.251 | 0.99 |
| 7898 | C | 0.264 | 0.98 |
| 7899 | A | 0.604 | 0.92 |
| 7900 | G | 0.509 | 0.86 |
| 7901 | C | 0.17  | 0.78 |
| 7902 | U | 0.414 | 0.91 |
| 7903 | G | 0.57  | 0.83 |
| 7904 | A | 0.59  | 0.68 |
| 7905 | A | 0.814 | 0.63 |
| 7906 | U | 0.631 | 0.63 |
| 7907 | G | 0.434 | 0.61 |
| 7908 | C | 0.122 | 0.84 |
| 7909 | U | 0.454 | 0.89 |



|      |   |       |      |
|------|---|-------|------|
| 7910 | U | 0.563 | 0.89 |
| 7911 | G | 0.529 | 0.66 |
| 7912 | G | 0.339 | 0.6  |
| 7913 | G | 0.298 | 0.17 |
| 7914 | G | 0.434 | 0.22 |
| 7915 | A | 0.637 | 0.53 |
| 7916 | U | 0.42  | 0.74 |
| 7917 | G | 0.746 | 0.72 |
| 7918 | U | 0.461 | 0.44 |
| 7919 | G | 0.549 | 0.4  |
| 7920 | C | 0.366 | 0.26 |
| 7921 | G | 0.543 | 0.3  |
| 7922 | U | 0.359 | 0.57 |
| 7923 | U | 0.631 | 0.59 |
| 7924 | U | 1.038 | 0.62 |
| 7925 | A | 1.899 | 0.85 |
| 7926 | G | 1.397 | 0.85 |
| 7927 | A | 0.671 | 0.73 |
| 7928 | C | 0.665 | 0.43 |
| 7929 | A | 0.732 | 0.44 |
| 7930 | A | 0.556 | 0.39 |
| 7931 | G | 0.597 | 0.46 |
| 7932 | U | 0.081 | 0.82 |
| 7933 | C | 0.02  | 0.9  |
| 7934 | U | 0.176 | 0.94 |
| 7935 | G | 0.007 | 0.84 |
| 7936 | C | 0.081 | 0.83 |
| 7937 | C | 0.027 | 0.89 |
| 7938 | A | 0.109 | 0.93 |
| 7939 | C | 0.231 | 0.88 |
| 7940 | A | 1.146 | 0.87 |
| 7941 | C | 0     | 0.09 |
| 7942 | U | 0.197 | 0.02 |
| 7943 | A | 2.394 | 0.02 |
| 7944 | C | 0.163 | 0.65 |
| 7945 | U | 0.17  | 0.89 |
| 7946 | G | 0.061 | 0.91 |
| 7947 | U | 0.102 | 0.84 |
| 7948 | A | 0.054 | 0.74 |
| 7949 | C | 0.014 | 0.83 |
| 7950 | C | 0.095 | 0.62 |
| 7951 | A | 0.075 | 0.62 |
| 7952 | U | 0.136 | 0.81 |

|      |   |       |      |
|------|---|-------|------|
| 7953 | G | 0.427 | 0.82 |
| 7954 | G | 1.648 | 0.65 |
| 7955 | C | 0.231 | 0.36 |
| 7956 | C | 0.529 | 0.5  |
| 7957 | A | 0.888 | 0.62 |
| 7958 | A | 0.793 | 0.67 |
| 7959 | A | 1.309 | 0.51 |
| 7960 | U | 0.807 | 0.42 |
| 7961 | G | 0.502 | 0.36 |
| 7962 | C | 0.454 | 0.34 |
| 7963 | A | 0.637 | 0.35 |
| 7964 | A | 0.909 | 0.38 |
| 7965 | G | 0.373 | 0.36 |
| 7966 | U | 0.285 | 0.05 |
| 7967 | C | 0.149 | 0.07 |
| 7968 | U | 0.8   | 0.07 |
| 7969 | A | 1.072 | 0.01 |
| 7970 | A | 0.909 | 0    |
| 7971 | C | 0.231 | 0    |
| 7972 | A | 0.583 | 0.02 |
| 7973 | C | 0.19  | 0.97 |
| 7974 | C | 0.746 | 0.98 |
| 7975 | A | 1.194 | 0.05 |
| 7976 | A | 1.058 | 0.01 |
| 7977 | A | 1.492 | 0.01 |
| 7978 | G | 0.529 | 0.03 |
| 7979 | U | 0.461 | 0.07 |
| 7980 | G | 0.434 | 0.52 |
| 7981 | G | 0.529 | 0.92 |
| 7982 | A | 0.922 | 0.49 |
| 7983 | A | 0.787 | 0.01 |
| 7984 | C | 0.76  | 0.03 |
| 7985 | A | 0.882 | 0.03 |
| 7986 | A | 0.475 | 0    |
| 7987 | U | 0.366 | 0.06 |
| 7988 | G | 0.312 | 0.06 |
| 7989 | A | 0.19  | 0.05 |
| 7990 | G | 0.054 | 0.03 |
| 7991 | A | 0.027 | 0    |
| 7992 | C | 0.109 | 0.05 |
| 7993 | U | 0.366 | 0.06 |
| 7994 | U | 0.543 | 0.1  |
| 7995 | G | 0.298 | 0.09 |

|      |   |       |          |
|------|---|-------|----------|
| 7996 | G | 0.271 | 0.05     |
| 7997 | C | 0.326 | 0.04     |
| 7998 | A | 0.8   | 0.04     |
| 7999 | A | 1.465 | 0        |
| 8000 | G | 1.587 | 0        |
| 8001 | A | 1.343 | 0        |
| 8002 | G | 0.339 | 0.03     |
| 8003 | U | 0.231 | 0.05     |
| 8004 | G | 0.231 | 0.04     |
| 8005 | G | 0.149 | 0.01     |
| 8006 | G | 0.149 | 0.01     |
| 8007 | A | 0.366 | 0        |
| 8008 | G | 0.136 | 1.28E-05 |
| 8009 | C | 0.176 | 4.48E-06 |
| 8010 | G | 0.353 | 7.98E-06 |
| 8011 | A | 0.732 | 5.13E-06 |
| 8012 | A | 0.76  | 5.51E-05 |
| 8013 | A | 0.488 | 5.81E-05 |
| 8014 | G | 0.231 | 5.65E-06 |
| 8015 | G | 0.136 | 4.52E-05 |
| 8016 | U | 0.122 | 0        |
| 8017 | U | 0.217 | 0        |
| 8018 | G | 0.461 | 0.01     |
| 8019 | A | 0.244 | 0.01     |
| 8020 | C | 0.041 | 0        |
| 8021 | U | 0.163 | 0.84     |
| 8022 | U | 0.054 | 0.86     |
| 8023 | C | 0.054 | 0.15     |
| 8024 | U | 0.176 | 0.24     |
| 8025 | U | 0.298 | 0.15     |
| 8026 | G | 0.339 | 0.05     |
| 8027 | G | 0.353 | 0.06     |
| 8028 | A | 0.529 | 0.08     |
| 8029 | A | 0.732 | 0.62     |
| 8030 | G | 0.637 | 0.6      |
| 8031 | A | 0.855 | 0.04     |
| 8032 | A | 0.678 | 0.03     |
| 8033 | A | 0.61  | 0.02     |
| 8034 | A | 0.773 | 0.01     |
| 8035 | U | 0.543 | 0.03     |
| 8036 | A | 1.343 | 0.06     |
| 8037 | U | 0.827 | 0.53     |
| 8038 | A | 1.044 | 0.54     |

|      |   |       |          |
|------|---|-------|----------|
| 8039 | A | 0.814 | 0.11     |
| 8040 | C | 0.841 | 0.11     |
| 8041 | A | 0.99  | 0.86     |
| 8042 | G | 0.366 | 0.84     |
| 8043 | C | 0.366 | 0        |
| 8044 | C | 0.027 | 2.57E-05 |
| 8045 | C | 0.041 | 6.23E-05 |
| 8046 | U | 0.041 | 0.8      |
| 8047 | C | 0.176 | 1        |
| 8048 | C | 2.509 | 0.97     |
| 8049 | U | 1.343 | 0.83     |
| 8050 | A | 1.044 | 0.07     |
| 8051 | G | 1.655 | 0.17     |
| 8052 | A | 0.149 | 0.11     |
| 8053 | G | 0.109 | 0        |
| 8054 | G | 0.176 | 0        |
| 8055 | A | 0.027 | 0.05     |
| 8056 | G | 0.136 | 0.08     |
| 8057 | G | 0.163 | 0.03     |
| 8058 | C | 0.773 | 0.06     |
| 8059 | A | 0.665 | 0.16     |
| 8060 | C | 1.099 | 0.11     |
| 8061 | A | 0.773 | 0.03     |
| 8062 | A | 0.556 | 0.75     |
| 8063 | A | 0.298 | 0.88     |
| 8064 | U | 0.271 | 1        |
| 8065 | U | 0.298 | 0.8      |
| 8066 | C | 0.42  | 0        |
| 8067 | A | 0.529 | 0        |
| 8068 | A | 0.393 | 0        |
| 8069 | C | 0.868 | 0.01     |
| 8070 | A | 1.017 | 0.01     |
| 8071 | A | 1.397 | 0.01     |
| 8072 | G | 1.18  | 0.01     |
| 8073 | A | 1.166 | 0.01     |
| 8074 | G | 1.248 | 0.01     |
| 8075 | A | 1.234 | 0.05     |
| 8076 | A | 1.275 | 0.07     |
| 8077 | G | 1.221 | 0.08     |
| 8078 | A | 1.004 | 0.07     |
| 8079 | A | 0.57  | 0.06     |
| 8080 | C | 1.017 | 0.07     |
| 8081 | A | 0.448 | 0.08     |

|      |   |       |      |
|------|---|-------|------|
| 8082 | U | 0.57  | 0.56 |
| 8083 | G | 0.353 | 0.77 |
| 8084 | U | 1.017 | 0.79 |
| 8085 | A | 0.583 | 0.69 |
| 8086 | U | 1.329 | 0.03 |
| 8087 | G | 0.963 | 0.02 |
| 8088 | A | 0.841 | 0.03 |
| 8089 | A | 0.597 | 0.04 |
| 8090 | U | 0.651 | 0.14 |
| 8091 | U | 1.221 | 0.82 |
| 8092 | A | 0.719 | 0.83 |
| 8093 | C | 3.54  | 0.77 |
| 8094 | A | 1.221 | 0.59 |
| 8095 | A | 1.316 | 0.13 |
| 8096 | A | 1.194 | 0.23 |
| 8097 | A | 0.407 | 0.28 |
| 8098 | G | 0.502 | 0.35 |
| 8099 | U | 0.529 | 0.64 |
| 8100 | U | 1.424 | 0.82 |
| 8101 | G | 0.868 | 0.82 |
| 8102 | A | 0.488 | 0.7  |
| 8103 | A | 0.488 | 0.66 |
| 8104 | U | 1.017 | 0.27 |
| 8105 | A | 1.004 | 0.26 |
| 8106 | G | 0.054 | 0.13 |
| 8107 | C | 0.054 | 0.1  |
| 8108 | U | 0.054 | 0.12 |
| 8109 | G | 0.041 | 0.1  |
| 8110 | G | 0.054 | 0.06 |
| 8111 | G | 0.244 | 0.06 |
| 8112 | A | 0.217 | 0.13 |
| 8113 | U | 0.8   | 0.34 |
| 8114 | G | 0.353 | 0.46 |
| 8115 | U | 0.461 | 0.34 |
| 8116 | G | 0.298 | 0.17 |
| 8117 | U | 0.109 | 0.72 |
| 8118 | U | 0.081 | 0.86 |
| 8119 | U | 0.041 | 0.86 |
| 8120 | G | 0.027 | 0.79 |
| 8121 | G | 0.122 | 0.58 |
| 8122 | C | 0.095 | 0.25 |
| 8123 | A | 0.149 | 0.25 |
| 8124 | A | 0.448 | 0.23 |

|      |   |       |      |
|------|---|-------|------|
| 8125 | U | 0.488 | 0.11 |
| 8126 | U | 0.068 | 0.26 |
| 8127 | G | 0.027 | 0.69 |
| 8128 | G | 0.041 | 0.7  |
| 8129 | U | 0.068 | 0.62 |
| 8130 | U | 0.122 | 0.46 |
| 8131 | U | 0.244 | 0.47 |
| 8132 | G | 1.411 | 0.32 |
| 8133 | A | 0.109 | 0.08 |
| 8134 | C | 0.068 | 0.11 |
| 8135 | C | 0.122 | 0.13 |
| 8136 | U | 0.176 | 0.11 |
| 8137 | U | 0.081 | 0.31 |
| 8138 | G | 0.027 | 0.63 |
| 8139 | C | 0.054 | 0.79 |
| 8140 | U | 0.054 | 0.77 |
| 8141 | U | 0.041 | 0.23 |
| 8142 | C | 0.231 | 0.24 |
| 8143 | U | 0.42  | 0.25 |
| 8144 | U | 0.855 | 0.26 |
| 8145 | G | 0.637 | 0.41 |
| 8146 | G | 1.004 | 0.42 |
| 8147 | A | 0.705 | 0.24 |
| 8148 | U | 1.031 | 0.24 |
| 8149 | A | 0.855 | 0.21 |
| 8150 | A | 0.8   | 0.21 |
| 8151 | A | 0.665 | 0.21 |
| 8152 | G | 0.366 | 0.26 |
| 8153 | U | 0.719 | 0.97 |
| 8154 | A | 0.326 | 0.96 |
| 8155 | U | 1.18  | 0.67 |
| 8156 | A | 0.448 | 0.51 |
| 8157 | U | 0.787 | 0.53 |
| 8158 | A | 0.515 | 0.22 |
| 8159 | C | 0.705 | 0.21 |
| 8160 | A | 0.787 | 0.05 |
| 8161 | A | 0.665 | 0.05 |
| 8162 | U | 1.18  | 0.1  |
| 8163 | A | 0.42  | 0.12 |
| 8164 | U | 0.787 | 0.23 |
| 8165 | G | 0.719 | 0.37 |
| 8166 | G | 0.502 | 0.38 |
| 8167 | A | 0.312 | 0.2  |

|      |   |       |      |
|------|---|-------|------|
| 8168 | G | 0.298 | 0.1  |
| 8169 | U | 0.42  | 0.33 |
| 8170 | U | 0.57  | 0.42 |
| 8171 | U | 0.936 | 0.33 |
| 8172 | A | 0.475 | 0.39 |
| 8173 | U | 0.977 | 0.44 |
| 8174 | A | 0.624 | 0.64 |
| 8175 | U | 0.882 | 0.73 |
| 8176 | A | 0.488 | 0.7  |
| 8177 | G | 0.366 | 0.29 |
| 8178 | U | 0.285 | 0.38 |
| 8179 | U | 0.393 | 0.37 |
| 8180 | G | 0.353 | 0.12 |
| 8181 | U | 0.597 | 0.1  |
| 8182 | A | 0.231 | 0.92 |
| 8183 | G | 0.841 | 0.97 |
| 8184 | G | 0.624 | 0.96 |
| 8185 | A | 0.556 | 0.93 |
| 8186 | G | 0.393 | 0.98 |
| 8187 | U | 0.597 | 0.8  |
| 8188 | A | 0.787 | 0.89 |
| 8189 | A | 0.57  | 0.79 |
| 8190 | U | 0.326 | 0.54 |
| 8191 | A | 0.095 | 0.53 |
| 8192 | C | 0.149 | 0.44 |
| 8193 | U | 0.326 | 0.41 |
| 8194 | G | 0.271 | 0.28 |
| 8195 | U | 0.556 | 0.96 |
| 8196 | U | 1.058 | 0.95 |
| 8197 | A | 0.943 | 0.81 |
| 8198 | A | 0.956 | 0.5  |
| 8199 | G | 0.753 | 0.36 |
| 8200 | A | 0.76  | 0.19 |
| 8201 | A | 0.631 | 0.6  |
| 8202 | U | 0.678 | 0.87 |
| 8203 | A | 0.651 | 0.86 |
| 8204 | G | 0.326 | 0.44 |
| 8205 | U | 0.224 | 0.34 |
| 8206 | G | 0.142 | 0.25 |
| 8207 | A | 0.427 | 0.23 |
| 8208 | U | 0.326 | 0.76 |
| 8209 | C | 0.203 | 0.66 |
| 8210 | U | 1.166 | 0.66 |

|      |   |       |      |
|------|---|-------|------|
| 8211 | A | 1.166 | 0.16 |
| 8212 | U | 0.461 | 0.07 |
| 8213 | A | 0.909 | 0.46 |
| 8214 | U | 0.027 | 0.66 |
| 8215 | A | 0.515 | 0.66 |
| 8216 | G | 0.637 | 0.57 |
| 8217 | U | 0.271 | 0.57 |
| 8218 | A | 0.922 | 0.56 |
| 8219 | C | 0.271 | 0.32 |
| 8220 | A | 0.936 | 0.2  |
| 8221 | A | 0.678 | 0.25 |
| 8222 | A | 1.004 | 0.34 |
| 8223 | U | 0.57  | 0.56 |
| 8224 | G | 0.258 | 0.55 |
| 8225 | C | 0.19  | 0.97 |
| 8226 | U | 0.312 | 0.96 |
| 8227 | A | 0.678 | 0.83 |
| 8228 | G | 0.312 | 0.28 |
| 8229 | C | 0.176 | 0.05 |
| 8230 | U | 0.42  | 0.11 |
| 8231 | A | 0.678 | 0.27 |
| 8232 | A | 0.814 | 0.22 |
| 8233 | G | 0.407 | 0.04 |
| 8234 | U | 0.298 | 0.51 |
| 8235 | U | 0.366 | 0.7  |
| 8236 | A | 0.746 | 0.87 |
| 8237 | A | 0.57  | 0.81 |
| 8238 | G | 0.393 | 0.7  |
| 8239 | G | 0.448 | 0.21 |
| 8240 | C | 0.176 | 0.24 |
| 8241 | A | 0.393 | 0.3  |
| 8242 | G | 0.271 | 0.27 |
| 8243 | G | 0.19  | 0.41 |
| 8244 | G | 0.122 | 0.51 |
| 8245 | G | 0.149 | 0.68 |
| 8246 | U | 0.163 | 0.64 |
| 8247 | A | 0.637 | 0.55 |
| 8248 | U | 0.475 | 0.66 |
| 8249 | A | 0.949 | 0.65 |
| 8250 | G | 0.353 | 0.49 |
| 8251 | G | 0.081 | 0.4  |
| 8252 | C | 0.027 | 0.25 |
| 8253 | C | 0.054 | 0.36 |



|      |   |       |      |
|------|---|-------|------|
| 8254 | A | 0.298 | 0.43 |
| 8255 | G | 0.922 | 0.39 |
| 8256 | U | 0.095 | 0.42 |
| 8257 | G | 0.244 | 0.91 |
| 8258 | U | 0.298 | 0.94 |
| 8259 | U | 0.203 | 0.93 |
| 8260 | C | 0.244 | 0.93 |
| 8261 | U | 0.488 | 0.93 |
| 8262 | C | 0.217 | 0.25 |
| 8263 | U | 0.163 | 0.26 |
| 8264 | U | 0.231 | 0.34 |
| 8265 | C | 0.163 | 0.27 |
| 8266 | C | 0.109 | 0.26 |
| 8267 | C | 0.122 | 0.14 |
| 8268 | C | 0.109 | 0.11 |
| 8269 | A | 0.149 | 0.1  |
| 8270 | C | 0.176 | 0.13 |
| 8271 | C | 0.122 | 0.29 |
| 8272 | C | 0     | 0.44 |
| 8273 | U | 0.163 | 0.45 |
| 8274 | C | 0.176 | 0.27 |
| 8275 | U | 0.122 | 0.87 |
| 8276 | U | 0.624 | 0.97 |
| 8277 | A | 2.279 | 0.98 |
| 8278 | U | 0.366 | 0.98 |
| 8279 | U | 0.366 | 0.98 |
| 8280 | U | 0.258 | 0.29 |
| 8281 | C | 0.027 | 0.12 |
| 8282 | C | 0.353 | 0.11 |
| 8283 | A | 0.665 | 0.6  |
| 8284 | G | 0.393 | 0.6  |
| 8285 | C | 0.38  | 0.16 |
| 8286 | A | 0.637 | 0.24 |
| 8287 | G | 0.61  | 0.76 |
| 8288 | A | 0.732 | 0.61 |
| 8289 | C | 0.068 | 0.84 |
| 8290 | C | 0.122 | 0.44 |
| 8291 | C | 0.488 | 0.42 |
| 8292 | A | 1.587 | 0.4  |
| 8293 | U | 0.895 | 0.38 |
| 8294 | A | 1.112 | 0.54 |
| 8295 | U | 0.502 | 0.63 |
| 8296 | C | 0.285 | 0.63 |

|      |   |       |      |
|------|---|-------|------|
| 8297 | C | 0.298 | 0.14 |
| 8298 | A | 0.76  | 0.1  |
| 8299 | A | 1.641 | 0.08 |
| 8300 | C | 0.502 | 0.42 |
| 8301 | A | 1.234 | 0.45 |
| 8302 | G | 0.203 | 0.51 |
| 8303 | G | 0.298 | 0.53 |
| 8304 | A | 0.298 | 0.44 |
| 8305 | C | 0.163 | 0.29 |
| 8306 | C | 0.217 | 0.41 |
| 8307 | C | 0.217 | 0.43 |
| 8308 | G | 0.393 | 0.89 |
| 8309 | G | 0.244 | 0.92 |
| 8310 | C | 0.298 | 0.48 |
| 8311 | A | 0.719 | 0.14 |
| 8312 | C | 0     | 0.19 |
| 8313 | U | 0.475 | 0.28 |
| 8314 | G | 0.217 | 0.53 |
| 8315 | C | 0.041 | 0.67 |
| 8316 | C | 0.163 | 0.67 |
| 8317 | A | 0.515 | 0.57 |
| 8318 | A | 1.614 | 0.56 |
| 8319 | C | 0.298 | 0.74 |
| 8320 | C | 0.231 | 0.76 |
| 8321 | A | 1.004 | 0.43 |
| 8322 | G | 1.397 | 0.28 |
| 8323 | A | 1.655 | 0.5  |
| 8324 | G | 1.126 | 0.47 |
| 8325 | A | 1.194 | 0.19 |
| 8326 | A | 1.397 | 0.17 |
| 8327 | G | 0.597 | 0.12 |
| 8328 | G | 0.393 | 0.08 |
| 8329 | C | 0.271 | 0.12 |
| 8330 | A | 1.234 | 0.08 |
| 8331 | A | 1.777 | 0.05 |
| 8332 | A | 1.126 | 0.06 |
| 8333 | G | 0.855 | 0.08 |
| 8334 | A | 1.004 | 0.1  |
| 8335 | A | 0.678 | 0.13 |
| 8336 | A | 0.963 | 0.17 |
| 8337 | G | 0.732 | 0.18 |
| 8338 | A | 0.434 | 0.29 |
| 8339 | G | 0.353 | 0.35 |

|      |   |       |      |
|------|---|-------|------|
| 8340 | A | 0.746 | 0.38 |
| 8341 | C | 0.42  | 0.61 |
| 8342 | G | 0.19  | 0.71 |
| 8343 | G | 0.176 | 0.54 |
| 8344 | U | 0.231 | 0.62 |
| 8345 | G | 0.231 | 0.77 |
| 8346 | G | 0.393 | 0.31 |
| 8347 | A | 0.339 | 0.18 |
| 8348 | G | 0.502 | 0.03 |
| 8349 | A | 0.61  | 0.03 |
| 8350 | A | 0.692 | 0.05 |
| 8351 | G | 0     | 0.05 |
| 8352 | G | 0.217 | 0.04 |
| 8353 | C | 0.353 | 0.07 |
| 8354 | G | 0.461 | 0.09 |
| 8355 | G | 0.895 | 0.09 |
| 8356 | U | 0.285 | 0.06 |
| 8357 | G | 0.366 | 0.11 |
| 8358 | G | 0.231 | 0.09 |
| 8359 | C | 0.095 | 0.04 |
| 8360 | A | 0.99  | 0.03 |
| 8361 | A | 1.221 | 0.04 |
| 8362 | C | 0.651 | 0.49 |
| 8363 | A | 1.234 | 0.51 |
| 8364 | G | 0.488 | 0.73 |
| 8365 | C | 0.109 | 0.89 |
| 8366 | U | 0.081 | 0.92 |
| 8367 | C | 0.136 | 0.94 |
| 8368 | C | 0.136 | 0.88 |
| 8369 | U | 0.122 | 0.52 |
| 8370 | G | 0     | 0.51 |
| 8371 | G | 0.882 | 0.84 |
| 8372 | C | 0.109 | 0.47 |
| 8373 | C | 0.122 | 0.04 |
| 8374 | U | 0.475 | 0.43 |
| 8375 | U | 0.407 | 0.49 |
| 8376 | G | 0.339 | 0.5  |
| 8377 | G | 0.203 | 0.9  |
| 8378 | C | 0.095 | 0.81 |
| 8379 | A | 0.692 | 0.46 |
| 8380 | G | 0.773 | 0.49 |
| 8381 | A | 1.166 | 0.54 |
| 8382 | U | 1.017 | 0.59 |

|      |   |       |      |
|------|---|-------|------|
| 8383 | A | 1.75  | 0.42 |
| 8384 | G | 1.275 | 0.39 |
| 8385 | A | 1.044 | 0.46 |
| 8386 | A | 1.397 | 0.99 |
| 8387 | U | 0.787 | 0.96 |
| 8388 | A | 2.116 | 0    |
| 8389 | U | 0.909 | 0    |
| 8390 | A | 1.885 | 0    |
| 8391 | U | 1.004 | 0    |
| 8392 | U | 1.221 | 0    |
| 8393 | C | 0.977 | 0.01 |
| 8394 | A | 1.099 | 0.96 |
| 8395 | U | 0.515 | 0.99 |
| 8396 | U | 0.366 | 0.47 |
| 8397 | U | 0.271 | 0.39 |
| 8398 | C | 0.217 | 0.14 |
| 8399 | C | 0.068 | 0.22 |
| 8400 | U | 0.448 | 0.27 |
| 8401 | G | 0.922 | 0.24 |
| 8402 | A | 0.746 | 0.12 |
| 8403 | U | 0.244 | 0.25 |
| 8404 | C | 0.136 | 0.23 |
| 8405 | C | 0.136 | 0.24 |
| 8406 | G | 0.298 | 0.1  |
| 8407 | C | 0.109 | 0.13 |
| 8408 | C | 0.244 | 0.17 |
| 8409 | A | 0.855 | 0.13 |
| 8410 | A | 1.072 | 0.01 |
| 8411 | C | 0.312 | 0    |
| 8412 | U | 0.719 | 0.01 |
| 8413 | G | 1.221 | 0.01 |
| 8414 | A | 1.289 | 0    |
| 8415 | U | 1.017 | 0    |
| 8416 | A | 1.017 | 0.01 |
| 8417 | C | 0.366 | 0.29 |
| 8418 | G | 0.461 | 0.3  |
| 8419 | C | 0.068 | 0.03 |
| 8420 | C | 0.081 | 0.5  |
| 8421 | U | 0.217 | 0.52 |
| 8422 | C | 0.258 | 0.07 |
| 8423 | U | 0.583 | 0.08 |
| 8424 | U | 0.936 | 0.03 |
| 8425 | G | 0.949 | 0.02 |

|      |   |       |      |
|------|---|-------|------|
| 8426 | A | 0.8   | 0.01 |
| 8427 | C | 0.258 | 0.01 |
| 8428 | U | 0.475 | 0.29 |
| 8429 | U | 0.868 | 0.77 |
| 8430 | G | 0.475 | 0.53 |
| 8431 | G | 0.014 | 0.09 |
| 8432 | C | 0.434 | 0.12 |
| 8433 | U | 1.248 | 0.12 |
| 8434 | A | 0.787 | 0.01 |
| 8435 | U | 0.76  | 0.01 |
| 8436 | U | 0.678 | 0.01 |
| 8437 | C | 0.936 | 0.15 |
| 8438 | A | 0.746 | 0.26 |
| 8439 | G | 0.746 | 0.11 |
| 8440 | C | 1.126 | 0.02 |
| 8441 | A | 0.936 | 0.02 |
| 8442 | A | 0.57  | 0.01 |
| 8443 | C | 0.488 | 0.09 |
| 8444 | U |       | 0.29 |
| 8445 | G | 0.353 | 0.21 |
| 8446 | C | 0.732 | 0    |
| 8447 | A | 0.529 | 0.11 |
| 8448 | G | 0.448 | 0.13 |
| 8449 | A | 0.515 | 0.03 |
| 8450 | A | 0.312 | 0.01 |
| 8451 | C | 0.068 | 0.02 |
| 8452 | C | 0.068 | 0.82 |
| 8453 | U | 0.258 | 0.87 |
| 8454 | U | 0.488 | 0.78 |
| 8455 | G | 0.271 | 0.02 |
| 8456 | C | 0     | 0.03 |
| 8457 | U | 0.407 | 0.07 |
| 8458 | A | 1.153 | 0.04 |
| 8459 | U | 0.556 | 0.03 |
| 8460 | C | 0.529 | 0.03 |
| 8461 | G | 1.044 | 0    |
| 8462 | A | 1.221 | 0.75 |
| 8463 | G | 0.99  | 0.94 |
| 8464 | A | 0.556 | 0.9  |
| 8465 | G | 0.909 | 0.02 |
| 8466 | U | 0.61  | 0    |
| 8467 | A | 1.695 | 0    |
| 8468 | U | 0.868 | 0.07 |

|      |   |       |          |
|------|---|-------|----------|
| 8469 | A |       | 0.07     |
| 8470 | C | 1.004 | 0        |
| 8471 | C | 0     | 0        |
| 8472 | A | 0.353 | 0        |
| 8473 | G | 0.8   | 0.03     |
| 8474 | A | 0.773 | 0.09     |
| 8475 | U | 0     | 0.09     |
| 8476 | C | 0     | 0        |
| 8477 | C | 0.014 | 0        |
| 8478 | U | 0.109 | 0        |
| 8479 | C | 0.041 | 7.10E-05 |
| 8480 | C | 0.041 | 0        |
| 8481 | A | 0.271 | 0.16     |
| 8482 | A | 0.298 | 0.16     |
| 8483 | C | 0.081 | 0.03     |
| 8484 | C | 0.312 | 0        |
| 8485 | A | 0.339 | 0        |
| 8486 | A | 0.57  | 0        |
| 8487 | U | 0.502 | 0.02     |
| 8488 | A | 0.583 | 0.03     |
| 8489 | C | 0.068 | 0.05     |
| 8490 | U | 0.787 | 0.15     |
| 8491 | C | 0.502 | 0.14     |
| 8492 | C | 0.461 | 0.06     |
| 8493 | A | 0.99  | 0.07     |
| 8494 | G | 0.732 | 0.22     |
| 8495 | A | 0.8   | 0.22     |
| 8496 | G | 0.624 | 0.16     |
| 8497 | G | 0.176 | 0.2      |
| 8498 | C | 0.014 | 0.17     |
| 8499 | U | 0.095 | 0.14     |
| 8500 | C | 0     | 0.06     |
| 8501 | U | 0.014 | 0.06     |
| 8502 | C | 0     | 0.1      |
| 8503 | U | 1.343 | 0.15     |
| 8504 | G | 0.461 | 0.39     |
| 8505 | C | 0.203 | 0.37     |
| 8506 | G | 0.393 | 0.12     |
| 8507 | A | 0.353 | 0.06     |
| 8508 | C | 0.122 | 0.02     |
| 8509 | C | 0     | 0.02     |
| 8510 | C | 0.095 | 0.39     |
| 8511 | U | 0.787 | 0.4      |

|      |   |       |          |
|------|---|-------|----------|
| 8512 | A | 1.072 | 0.07     |
| 8513 | C | 2.048 | 0.06     |
| 8514 | A | 1.329 | 0.07     |
| 8515 | G | 0.224 | 0.15     |
| 8516 | A | 0.692 | 0.15     |
| 8517 | G | 0.176 | 0.05     |
| 8518 | G | 0.217 | 0.1      |
| 8519 | A | 0.332 | 0.13     |
| 8520 | U | 0.482 | 0.26     |
| 8521 | U | 0     | 0.26     |
| 8522 | C | 0.814 | 0.3      |
| 8523 | G | 1.194 | 0.39     |
| 8524 | A | 0.99  | 0.12     |
| 8525 | G | 0.732 | 0.01     |
| 8526 | A | 1.234 | 0        |
| 8527 | A | 0.502 | 0.01     |
| 8528 | G | 0.081 | 0.07     |
| 8529 | U | 0.041 | 0.09     |
| 8530 | C | 0.014 | 0.1      |
| 8531 | C | 0.176 | 0.21     |
| 8532 | U | 0.339 | 0.21     |
| 8533 | C | 0.407 | 0        |
| 8534 | A | 1.099 | 0.01     |
| 8535 | G | 0.637 | 0        |
| 8536 | G | 0.651 | 0        |
| 8537 | A | 0.556 | 0        |
| 8538 | C | 0.095 | 0        |
| 8539 | U | 0.38  | 0        |
| 8540 | G | 0.529 | 1.10E-05 |
| 8541 | A | 0.773 | 9.90E-07 |
| 8542 | A | 0.841 | 2.99E-06 |
| 8543 | C | 0.122 | 9.85E-06 |
| 8544 | U | 0.339 | 0.1      |
| 8545 | G | 0.38  | 0.95     |
| 8546 | A | 0.61  | 0.94     |
| 8547 | C | 0.176 | 0.09     |
| 8548 | C | 0.068 | 0.02     |
| 8549 | U | 0.434 | 0.05     |
| 8550 | A | 0.583 | 0.04     |
| 8551 | C | 0.122 | 0.15     |
| 8552 | C | 0.366 | 0.95     |
| 8553 | U | 0.543 | 0.92     |
| 8554 | A | 0.8   | 0.21     |

|      |   |       |      |
|------|---|-------|------|
| 8555 | C | 0.285 | 0.23 |
| 8556 | A | 0.99  | 0.23 |
| 8557 | A | 0.949 | 0.22 |
| 8558 | U | 0.692 | 0.49 |
| 8559 | A | 1.37  | 0.5  |
| 8560 | U | 1.072 | 0.87 |
| 8561 | G | 0.57  | 0.84 |
| 8562 | G | 0.339 | 0.94 |
| 8563 | G | 0.231 | 0.87 |
| 8564 | U | 0.529 | 0.92 |
| 8565 | G | 0.366 | 0.88 |
| 8566 | G | 0.61  | 0.79 |
| 8567 | A | 0.868 | 0.67 |
| 8568 | G | 0.42  | 0.67 |
| 8569 | C | 0     | 0.68 |
| 8570 | U | 0.543 | 0.75 |
| 8571 | A | 0.529 | 0.75 |
| 8572 | U | 0.42  | 0.8  |
| 8573 | U | 0.326 | 0.8  |
| 8574 | U | 0.38  | 0.82 |
| 8575 | C | 0.149 | 0.97 |
| 8576 | C | 0     | 0.97 |
| 8577 | A | 1.112 | 0.83 |
| 8578 | U | 1.465 | 0.64 |
| 8579 | G | 2.279 | 0.61 |
| 8580 | A | 1.044 | 0.07 |
| 8581 | G | 0.081 | 0.06 |
| 8582 | G | 0.353 | 0.08 |
| 8583 | C | 0.176 | 0.11 |
| 8584 | G | 0.312 | 0.1  |
| 8585 | G | 0.312 | 0.31 |
| 8586 | U | 0.122 | 0.71 |
| 8587 | C | 0.57  | 0.84 |
| 8588 | C | 0.176 | 0.84 |
| 8589 | A | 1.017 | 0.79 |
| 8590 | G | 0.448 | 0.02 |
| 8591 | G | 0.353 | 0.02 |
| 8592 | C | 0.244 | 0.01 |
| 8593 | C | 0.366 | 0    |
| 8594 | G | 0.366 | 0    |
| 8595 | U | 0.217 | 0    |
| 8596 | C | 0.678 | 0    |
| 8597 | U | 0.515 | 0    |



|      |   |       |          |
|------|---|-------|----------|
| 8598 | G | 0.543 | 0        |
| 8599 | G | 0.61  | 0        |
| 8600 | A | 0.326 | 0.1      |
| 8601 | G | 0.407 | 0.1      |
| 8602 | A | 0.719 | 0.07     |
| 8603 | U | 0.312 | 0.02     |
| 8604 | C | 0.326 | 0.08     |
| 8605 | U | 0.936 | 0.08     |
| 8606 | G | 1.085 | 0        |
| 8607 | C | 0.366 | 0        |
| 8608 | G | 0.814 | 0.3      |
| 8609 | A | 0.882 | 0.31     |
| 8610 | C |       | 0.65     |
| 8611 | A | 1.506 | 0.96     |
| 8612 | G | 0.502 | 0.52     |
| 8613 | A | 0.977 | 0.02     |
| 8614 | G | 0.827 | 0.02     |
| 8615 | A | 1.533 | 0        |
| 8616 | C | 0.244 | 0        |
| 8617 | U | 0.556 | 0.43     |
| 8618 | C | 0.393 | 0.75     |
| 8619 | U | 0.76  | 0.9      |
| 8620 | U | 0.773 | 0.84     |
| 8621 | G | 0.855 | 0        |
| 8622 | C | 0.285 | 0        |
| 8623 | G | 0.271 | 8.23E-05 |
| 8624 | G | 0.19  | 4.86E-06 |
| 8625 | G | 0.353 | 9.24E-07 |
| 8626 | C | 0.963 | 1.60E-05 |
| 8627 | G | 0.637 | 1.60E-05 |
| 8628 | C | 0.271 | 5.85E-06 |
| 8629 | G | 0.475 | 1.63E-05 |
| 8630 | U | 0.597 | 2.92E-05 |
| 8631 | G | 0.326 | 2.10E-05 |
| 8632 | G | 0.081 | 1.91E-07 |
| 8633 | G | 0.271 | 0        |
| 8634 | G | 0.203 | 0        |
| 8635 | A | 0.963 | 2.59E-07 |
| 8636 | G | 1.478 | 2.39E-07 |
| 8637 | A | 0.99  | 2.26E-06 |
| 8638 | C | 0.285 | 0        |
| 8639 | U | 0.76  | 0.04     |
| 8640 | U | 0.99  | 0.04     |

|      |   |       |          |
|------|---|-------|----------|
| 8641 | A | 1.926 | 3.50E-06 |
| 8642 | U | 1.126 | 8.80E-06 |
| 8643 | G | 0.678 | 9.20E-06 |
| 8644 | G | 0.868 | 1.51E-05 |
| 8645 | G | 0.515 | 0.03     |
| 8646 | A | 0.719 | 0.04     |
| 8647 | G | 0.692 | 0.01     |
| 8648 | A | 0.787 | 0        |
| 8649 | C | 0.203 | 4.73E-06 |
| 8650 | U | 0.217 | 1.73E-06 |
| 8651 | C | 0.163 | 9.04E-07 |
| 8652 | U | 1.004 | 8.73E-07 |
| 8653 | U | 1.695 | 0        |
| 8654 | A | 1.845 | 0        |
| 8655 | G | 1.058 | 0        |
| 8656 | G | 1.085 | 2.83E-06 |
| 8657 | A | 0.719 | 2.08E-05 |
| 8658 | G | 1.017 | 0        |
| 8659 | A | 1.031 | 0        |
| 8660 | G | 0.678 | 0        |
| 8661 | G | 0.895 | 0        |
| 8662 | U | 0.61  | 0        |
| 8663 | G | 0.285 | 0.1      |
| 8664 | G | 0.556 | 0.14     |
| 8665 | A | 0.909 | 0.23     |
| 8666 | A | 1.044 | 0.25     |
| 8667 | G | 0.8   | 0.67     |
| 8668 | A | 1.383 | 0.61     |
| 8669 | U | 0.922 | 0.07     |
| 8670 | G | 0.895 | 0.04     |
| 8671 | G | 0.543 | 0.01     |
| 8672 | A | 1.438 | 0.14     |
| 8673 | U | 0.963 | 0.82     |
| 8674 | A | 1.058 | 0.85     |
| 8675 | C | 0.258 | 0.35     |
| 8676 | U | 0.583 | 0.27     |
| 8677 | C | 1.207 | 0.01     |
| 8678 | G | 0.76  | 0        |
| 8679 | C | 0     | 0        |
| 8680 | A | 0.529 | 0.05     |
| 8681 | A | 0.678 | 0.12     |
| 8682 | U | 0.312 | 0.12     |
| 8683 | C | 0.068 | 0.02     |

|      |   |       |      |
|------|---|-------|------|
| 8684 | C | 0.054 | 0.01 |
| 8685 | C | 0.122 | 0.01 |
| 8686 | C | 0.339 | 0    |
| 8687 | A | 0.949 | 0    |
| 8688 | G | 0.515 | 0.01 |
| 8689 | G | 0.705 | 0.01 |
| 8690 | A | 1.044 | 0    |
| 8691 | G | 0.61  | 0    |
| 8692 | G | 0.637 | 0    |
| 8693 | A | 0.719 | 0.01 |
| 8694 | U | 0.665 | 0.28 |
| 8695 | U | 1.356 | 0.28 |
| 8696 | A | 2.184 | 0.19 |
| 8697 | G | 1.763 | 0.03 |
| 8698 | A | 1.221 | 0.05 |
| 8699 | C | 0     | 0.15 |
| 8700 | A | 1.085 | 0.23 |
| 8701 | A | 1.316 | 0.27 |
| 8702 | G | 0.746 | 0.26 |
| 8703 | G | 0.597 | 0.19 |
| 8704 | G | 0.298 | 0.1  |
| 8705 | C | 0.19  | 0.2  |
| 8706 | U | 1.275 | 0.31 |
| 8707 | U | 0.773 | 0.37 |
| 8708 | G | 1.316 | 0.37 |
| 8709 | A | 1.058 | 0.07 |
| 8710 | G | 0.488 | 0.01 |
| 8711 | C | 0.136 | 0.06 |
| 8712 | U | 0.258 | 0.23 |
| 8713 | C | 0.109 | 0.21 |
| 8714 | A | 0.448 | 0.17 |
| 8715 | C | 0.027 | 0.31 |
| 8716 | U | 0.19  | 0.44 |
| 8717 | C | 0.176 | 0.5  |
| 8718 | U | 0.095 | 0.63 |
| 8719 | C | 0.136 | 0.67 |
| 8720 | U | 1.072 | 0.32 |
| 8721 | U | 0.529 | 0.29 |
| 8722 | G | 0.977 | 0.22 |
| 8723 | U | 0.61  | 0.39 |
| 8724 | G | 0.963 | 0.77 |
| 8725 | A | 1.234 | 0.73 |
| 8726 | G | 0.583 | 0.36 |

|      |   |       |      |
|------|---|-------|------|
| 8727 | G | 0.543 | 0.5  |
| 8728 | G | 0.8   | 0.48 |
| 8729 | A | 1.139 | 0.09 |
| 8730 | C | 0.149 | 0.33 |
| 8731 | A | 1.234 | 0.36 |
| 8732 | G | 1.302 | 0.27 |
| 8733 | A | 1.614 | 0.16 |
| 8734 | A | 1.302 | 0.03 |
| 8735 | A | 0.977 | 0.23 |
| 8736 | U | 0.719 | 0.52 |
| 8737 | A | 0.841 | 0.31 |
| 8738 | C | 0.136 | 0.12 |
| 8739 | A | 0.99  | 0.05 |
| 8740 | A | 1.153 | 0.01 |
| 8741 | U | 0.597 | 0.19 |
| 8742 | C | 0.203 | 0.31 |
| 8743 | A | 1.085 | 0.33 |
| 8744 | G | 0.665 | 0.26 |
| 8745 | G | 0.529 | 0.13 |
| 8746 | G | 0.502 | 0.15 |
| 8747 | A | 0.922 | 0.11 |
| 8748 | C | 0.176 | 0.09 |
| 8749 | A | 0.692 | 0.11 |
| 8750 | G | 0.665 | 0.07 |
| 8751 | U | 0.529 | 0.3  |
| 8752 | A | 1.031 | 0.3  |
| 8753 | U | 0.556 | 0.15 |
| 8754 | A | 2.089 | 0.16 |
| 8755 | U | 0.719 | 0.2  |
| 8756 | G | 1.506 | 0.17 |
| 8757 | A | 1.031 | 0.03 |
| 8758 | A | 1.275 | 0.02 |
| 8759 | U | 0.909 | 0.01 |
| 8760 | A | 0.773 | 0.01 |
| 8761 | C | 0.068 | 0.07 |
| 8762 | U | 0.041 | 0.08 |
| 8763 | C | 0.095 | 0.03 |
| 8764 | C | 0     | 0.15 |
| 8765 | A | 0.203 | 0.24 |
| 8766 | U | 0.258 | 0.78 |
| 8767 | G | 0.231 | 0.89 |
| 8768 | G | 0.285 | 0.77 |
| 8769 | A | 0.475 | 0.08 |

|      |   |       |          |
|------|---|-------|----------|
| 8770 | G | 0.502 | 0.07     |
| 8771 | A | 0.963 | 0.07     |
| 8772 | A | 0.76  | 0.02     |
| 8773 | A | 0.637 | 0.04     |
| 8774 | C | 0.149 | 0.07     |
| 8775 | C | 0.041 | 0.63     |
| 8776 | C | 0.109 | 0.63     |
| 8777 | A | 0.529 | 0.59     |
| 8778 | G | 0.448 | 0.07     |
| 8779 | C | 0.258 | 0.04     |
| 8780 | U | 0.461 | 0.03     |
| 8781 | G | 0.8   | 0        |
| 8782 | A | 0.502 | 0        |
| 8783 | A | 0.543 | 0        |
| 8784 | G | 0.38  | 0        |
| 8785 | A | 0.475 | 0        |
| 8786 | G | 0.637 | 0        |
| 8787 | A | 0.529 | 0        |
| 8788 | G | 0.624 | 0        |
| 8789 | A | 0.841 | 4.16E-05 |
| 8790 | G | 0.787 | 4.97E-05 |
| 8791 | A | 0.814 | 7.00E-05 |
| 8792 | A | 1.099 | 0        |
| 8793 | A | 0.787 | 0        |
| 8794 | A | 0.637 | 3.47E-05 |
| 8795 | A | 0.827 | 8.07E-06 |
| 8796 | U | 0.665 | 0        |
| 8797 | U | 0.651 | 0        |
| 8798 | A | 0.739 | 0.01     |
| 8799 | G | 0.448 | 0.02     |
| 8800 | C | 0.007 | 0.03     |
| 8801 | A | 0.515 | 0.24     |
| 8802 | U | 0.176 | 0.65     |
| 8803 | A | 0.685 | 0.47     |
| 8804 | C | 0     | 0.35     |
| 8805 | A | 0.692 | 0.33     |
| 8806 | G | 0.522 | 0.25     |
| 8807 | A | 0.61  | 0.08     |
| 8808 | A | 0.631 | 0.35     |
| 8809 | A | 0.346 | 0.35     |
| 8810 | A | 0.339 | 0.08     |
| 8811 | C | 0.373 | 0.32     |
| 8812 | A | 0.678 | 0.29     |

|      |   |       |      |
|------|---|-------|------|
| 8813 | A | 0.488 | 0    |
| 8814 | A | 0.326 | 0    |
| 8815 | A | 0.909 | 0.12 |
| 8816 | U | 0.054 | 0.2  |
| 8817 | A | 0.353 | 0.11 |
| 8818 | U | 0.312 | 0.06 |
| 8819 | G | 0.488 | 0.03 |
| 8820 | G | 0.515 | 0.04 |
| 8821 | A | 0.719 | 0.24 |
| 8822 | U | 0.488 | 0.82 |
| 8823 | G | 0.556 | 0.61 |
| 8824 | A | 1.763 | 0.2  |
| 8825 | U | 1.37  | 0.48 |
| 8826 | A | 1.316 | 0.32 |
| 8827 | U | 0.393 | 0.66 |
| 8828 | A | 0.868 | 0.69 |
| 8829 | G | 0.556 | 0.09 |
| 8830 | A | 0.61  | 0.86 |
| 8831 | U | 0.502 | 0.88 |
| 8832 | G | 0.637 | 0.04 |
| 8833 | A | 0.583 | 0.08 |
| 8834 | G | 0.556 | 0.15 |
| 8835 | U | 0.339 | 0.13 |
| 8836 | A | 0.637 | 0.05 |
| 8837 | A | 0.637 | 0.06 |
| 8838 | G | 0.38  | 0.01 |
| 8839 | A | 0.57  | 0.66 |
| 8840 | U | 0.38  | 0.74 |
| 8841 | G | 0.339 | 0.09 |
| 8842 | A | 0.692 | 0.09 |
| 8843 | U | 0.461 | 0.67 |
| 8844 | G | 0.583 | 0.61 |
| 8845 | A | 0.637 | 0.02 |
| 8846 | C | 0.231 | 0.04 |
| 8847 | U | 0.366 | 0.35 |
| 8848 | U | 0.298 | 0.77 |
| 8849 | G | 0.339 | 0.5  |
| 8850 | G | 0.353 | 0.39 |
| 8851 | U | 0.231 | 0.43 |
| 8852 | A | 0.719 | 0.24 |
| 8853 | G | 1.072 | 0.02 |
| 8854 | G | 0.461 | 0.02 |
| 8855 | G | 0.339 | 0    |

|      |   |       |      |
|------|---|-------|------|
| 8856 | G | 0.217 | 0.01 |
| 8857 | U | 0.136 | 0    |
| 8858 | A | 0.556 | 0    |
| 8859 | U | 0.366 | 0    |
| 8860 | C | 0.19  | 0.01 |
| 8861 | A | 0.76  | 1    |
| 8862 | G | 0.583 | 1    |
| 8863 | U | 0.353 | 0.71 |
| 8864 | G | 0.665 | 0.24 |
| 8865 | A | 0.597 | 0.14 |
| 8866 | G | 0.61  | 0.01 |
| 8867 | G | 0     | 0.02 |
| 8868 | C | 0     | 0.06 |
| 8869 | C | 0.054 | 0.59 |
| 8870 | A | 0.57  | 0.73 |
| 8871 | A | 0.461 | 0.59 |
| 8872 | A | 1.085 | 0.63 |
| 8873 | A | 0.746 | 0.81 |
| 8874 | G | 0.203 | 0.8  |
| 8875 | U | 0.176 | 0.29 |
| 8876 | U | 0     | 0.29 |
| 8877 | C | 0.054 | 0.28 |
| 8878 | C | 0.176 | 0.63 |
| 8879 | C | 0.217 | 0.68 |
| 8880 | C | 0.041 | 0.88 |
| 8881 | U | 0.42  | 0.89 |
| 8882 | A | 0.76  | 0.36 |
| 8883 | A | 0.895 | 0.02 |
| 8884 | G | 0.855 | 0.02 |
| 8885 | A | 1.044 | 0.02 |
| 8886 | A | 0.827 | 0.01 |
| 8887 | C | 0.38  | 0.32 |
| 8888 | A | 0.502 | 0.84 |
| 8889 | A | 0.665 | 0.87 |
| 8890 | U | 0.366 | 0.91 |
| 8891 | G | 0.773 | 0.8  |
| 8892 | A | 0.434 | 0.56 |
| 8893 | G | 0.624 | 0.79 |
| 8894 | U | 0.678 | 0.84 |
| 8895 | U | 0.746 | 0.12 |
| 8896 | A | 0.583 | 0.08 |
| 8897 | C | 0.298 | 0.08 |
| 8898 | A | 0.678 | 0.04 |

|      |   |       |      |
|------|---|-------|------|
| 8899 | A | 0.814 | 0.03 |
| 8900 | A | 1.194 | 0.16 |
| 8901 | U | 0.773 | 0.24 |
| 8902 | U | 0.665 | 0.36 |
| 8903 | G | 0.448 | 0.25 |
| 8904 | G | 0.393 | 0.08 |
| 8905 | C | 0.312 | 0.09 |
| 8906 | A | 0.8   | 0.07 |
| 8907 | A | 1.18  | 0.19 |
| 8908 | U | 0.855 | 0.92 |
| 8909 | A | 1.411 | 0.82 |
| 8910 | G | 0.76  | 0.52 |
| 8911 | A | 0.515 | 0.2  |
| 8912 | C | 0.163 | 0.1  |
| 8913 | A | 0.271 | 0.54 |
| 8914 | U | 0.19  | 0.62 |
| 8915 | G | 0.054 | 0.66 |
| 8916 | U | 0.122 | 0.79 |
| 8917 | C | 0     | 0.74 |
| 8918 | U | 0.027 | 0.36 |
| 8919 | C | 0.285 | 0.43 |
| 8920 | A | 0     | 0.37 |
| 8921 | U | 0     | 0.66 |
| 8922 | U | 0.353 | 0.95 |
| 8923 | U | 0.651 | 0.92 |
| 8924 | U | 0.922 | 0.82 |
| 8925 | A | 1.411 | 0.21 |
| 8926 | U | 0.787 | 0.2  |
| 8927 | A | 1.614 | 0.12 |
| 8928 | A | 1.044 | 0.13 |
| 8929 | A | 1.221 | 0.13 |
| 8930 | A | 1.506 | 0.19 |
| 8931 | G | 1.329 | 0.17 |
| 8932 | A | 1.451 | 0.39 |
| 8933 | A | 0.936 | 0.84 |
| 8934 | A | 1.478 | 0.81 |
| 8935 | A | 0.57  | 0.68 |
| 8936 | G | 0.393 | 0.24 |
| 8937 | G | 0.203 | 0.19 |
| 8938 | G | 0.109 | 0.06 |
| 8939 | G | 0.136 | 0.09 |
| 8940 | G | 0.054 | 0.09 |
| 8941 | G | 0.176 | 0.2  |



|      |   |       |      |
|------|---|-------|------|
| 8942 | A | 0.149 | 0.35 |
| 8943 | C | 0     | 0.63 |
| 8944 | U | 0     | 0.68 |
| 8945 | G | 0.651 | 0.39 |
| 8946 | G | 0.827 | 0.21 |
| 8947 | A | 0.977 | 0.23 |
| 8948 | A | 1.234 | 0.24 |
| 8949 | G | 0.543 | 0.17 |
| 8950 | G | 0.42  | 0.22 |
| 8951 | G | 0.556 | 0.31 |
| 8952 | A | 0.461 | 0.34 |
| 8953 | U | 0.339 | 0.48 |
| 8954 | U | 0.8   | 0.65 |
| 8955 | U | 0.556 | 0.82 |
| 8956 | A | 1.451 | 0.8  |
| 8957 | U | 0.732 | 0.71 |
| 8958 | U | 0.882 | 0.68 |
| 8959 | A | 1.248 | 0.44 |
| 8960 | C | 0.434 | 0.09 |
| 8961 | A | 0.936 | 0.3  |
| 8962 | G | 0.515 | 0.59 |
| 8963 | U | 0.176 | 0.73 |
| 8964 | G | 0.678 | 0.37 |
| 8965 | C | 0.19  | 0.31 |
| 8966 | A | 0.882 | 0.21 |
| 8967 | A | 1.465 | 0.15 |
| 8968 | G | 1.655 | 0.14 |
| 8969 | A | 1.289 | 0.22 |
| 8970 | A | 0.692 | 0.32 |
| 8971 | G | 0.488 | 0.43 |
| 8972 | A | 0.841 | 0.51 |
| 8973 | C | 0.081 | 0.42 |
| 8974 | A | 0.882 | 0.36 |
| 8975 | U | 0.61  | 0.49 |
| 8976 | A | 1.383 | 0.35 |
| 8977 | G | 1.058 | 0.33 |
| 8978 | A | 0.814 | 0.14 |
| 8979 | A | 0.637 | 0.2  |
| 8980 | U | 0.244 | 0.36 |
| 8981 | C | 0.19  | 0.27 |
| 8982 | U | 0.231 | 0.96 |
| 8983 | U | 0.637 | 0.94 |
| 8984 | A | 1.641 | 0.63 |

|      |   |       |      |
|------|---|-------|------|
| 8985 | G | 0.841 | 0.09 |
| 8986 | A | 0.739 | 0.11 |
| 8987 | C | 0.21  | 0.22 |
| 8988 | A | 0.936 | 0.51 |
| 8989 | U | 0.176 | 0.55 |
| 8990 | A | 1.533 | 0.55 |
| 8991 | U | 0.631 | 0.68 |
| 8992 | A | 0.875 | 0.61 |
| 8993 | C | 0.068 | 0.86 |
| 8994 | U | 0.339 | 0.93 |
| 8995 | U | 0.814 | 0.87 |
| 8996 | A | 1.818 | 0.26 |
| 8997 | G | 1.275 | 0.03 |
| 8998 | A | 1.343 | 0.04 |
| 8999 | A | 1.153 | 0.04 |
| 9000 | A | 0.882 | 0.03 |
| 9001 | A | 0.97  | 0.04 |
| 9002 | G | 0.699 | 0.05 |
| 9003 | G | 0.936 | 0.05 |
| 9004 | A | 1.01  | 0.08 |
| 9005 | A | 0.834 | 0.09 |
| 9006 | G | 0.902 | 0.08 |
| 9007 | A | 1.065 | 0.24 |
| 9008 | A | 0.821 | 0.77 |
| 9009 | G | 0.353 | 0.82 |
| 9010 | G | 0.237 | 0.79 |
| 9011 | C | 0.115 | 0.52 |
| 9012 | A | 0.448 | 0.59 |
| 9013 | U | 0.387 | 0.68 |
| 9014 | C | 0.373 | 0.45 |
| 9015 | A | 1.065 | 0.7  |
| 9016 | U | 0.57  | 0.72 |
| 9017 | A | 0.644 | 0.17 |
| 9018 | C | 0.136 | 0.36 |
| 9019 | C | 0.38  | 0.29 |
| 9020 | A | 0.699 | 0.14 |
| 9021 | G | 0.78  | 0.11 |
| 9022 | A | 0.902 | 0.53 |
| 9023 | U | 0.454 | 0.62 |
| 9024 | U | 0.305 | 0.48 |
| 9025 | G | 0.163 | 0.46 |
| 9026 | G | 0.271 | 0.34 |
| 9027 | C | 0.224 | 0.13 |

|      |   |       |      |
|------|---|-------|------|
| 9028 | A | 0.414 | 0.07 |
| 9029 | G | 0.298 | 0.11 |
| 9030 | G | 0.414 | 0.13 |
| 9031 | A | 0.556 | 0.13 |
| 9032 | U | 0.366 | 0.19 |
| 9033 | U | 0.875 | 0.21 |
| 9034 | A | 1.153 | 0.14 |
| 9035 | C | 0.407 | 0.15 |
| 9036 | A | 0.678 | 0.17 |
| 9037 | C | 0.102 | 0.29 |
| 9038 | C | 0.183 | 0.37 |
| 9039 | U | 0.217 | 0.17 |
| 9040 | C | 0.102 | 0.11 |
| 9041 | A | 0.97  | 0.73 |
| 9042 | G | 0.827 | 0.71 |
| 9043 | G | 0.61  | 0.11 |
| 9044 | A | 0.502 | 0.06 |
| 9045 | C | 0.197 | 0.16 |
| 9046 | C | 0.278 | 0.17 |
| 9047 | A | 0.604 | 0.23 |
| 9048 | G | 0.359 | 0.21 |
| 9049 | G | 0.651 | 0.17 |
| 9050 | A | 0.658 | 0.09 |
| 9051 | A | 0.861 | 0.12 |
| 9052 | U | 0.705 | 0.69 |
| 9053 | U | 0.949 | 0.79 |
| 9054 | A | 1.343 | 0.28 |
| 9055 | G | 0.509 | 0.27 |
| 9056 | A | 0.644 | 0.19 |
| 9057 | U | 0.61  | 0.22 |
| 9058 | A | 0.916 | 0.12 |
| 9059 | C | 0.102 | 0.08 |
| 9060 | C | 0.088 | 0.14 |
| 9061 | C | 0.068 | 0.15 |
| 9062 | A | 0.8   | 0.1  |
| 9063 | A | 0.773 | 0.08 |
| 9064 | A | 0.997 | 0.1  |
| 9065 | G | 0.726 | 0.13 |
| 9066 | A | 0.949 | 0.19 |
| 9067 | C | 0.556 | 0.15 |
| 9068 | A | 0.868 | 0.5  |
| 9069 | U | 0.387 | 0.91 |
| 9070 | U | 0.624 | 0.63 |

|      |   |       |      |
|------|---|-------|------|
| 9071 | U | 0.997 | 0.14 |
| 9072 | G | 0.4   | 0.14 |
| 9073 | G | 0.068 | 0.13 |
| 9074 | C | 0.21  | 0.07 |
| 9075 | U | 0.305 | 0.53 |
| 9076 | G | 0.21  | 0.74 |
| 9077 | G | 0.258 | 0.71 |
| 9078 | C | 0.556 | 0.25 |
| 9079 | U | 0.861 | 0.59 |
| 9080 | A | 0.739 | 0.52 |
| 9081 | U | 0.109 | 0.39 |
| 9082 | G | 0.57  | 0.28 |
| 9083 | G | 1.085 | 0.23 |
| 9084 | A | 1.275 | 0.03 |
| 9085 | A | 1.065 | 0.06 |
| 9086 | A | 1.377 | 0.05 |
| 9087 | U | 1.37  | 0.1  |
| 9088 | U | 1.105 | 0.39 |
| 9089 | A | 0.637 | 0.38 |
| 9090 | G | 0.115 | 0.3  |
| 9091 | U | 0.461 | 0.44 |
| 9092 | C | 0.57  | 0.43 |
| 9093 | C | 0.434 | 0.72 |
| 9094 | C | 0.475 | 0.75 |
| 9095 | U | 0.231 | 0.76 |
| 9096 | G | 0.787 | 0.23 |
| 9097 | U | 0.882 | 0.37 |
| 9098 | A | 2.13  | 0.52 |
| 9099 | A | 1.506 | 0.35 |
| 9100 | A | 1.166 | 0.18 |
| 9101 | U | 0.61  | 0.02 |
| 9102 | G | 0.57  | 0.03 |
| 9103 | U | 0.515 | 0.03 |
| 9104 | A | 0.773 | 0    |
| 9105 | U | 0.597 | 0.23 |
| 9106 | C | 0.773 | 0.24 |
| 9107 | A | 1.072 | 0.07 |
| 9108 | G | 1.289 | 0.04 |
| 9109 | A | 1.668 | 0.04 |
| 9110 | U | 0.868 | 0.04 |
| 9111 | G | 1.099 | 0.19 |
| 9112 | A | 0.8   | 0.18 |
| 9113 | G | 0.42  | 0.01 |

|      |   |       |      |
|------|---|-------|------|
| 9114 | G | 0.543 | 0    |
| 9115 | C | 0.515 | 0    |
| 9116 | A | 1.194 | 0.01 |
| 9117 | C | 0.705 | 0    |
| 9118 | A | 0.882 | 0    |
| 9119 | G | 0.543 | 0    |
| 9120 | G | 1.261 | 0    |
| 9121 | A | 0.827 | 0    |
| 9122 | G | 0.583 | 0.01 |
| 9123 | G | 0.787 | 0.01 |
| 9124 | A | 1.275 | 0    |
| 9125 | U | 1.004 | 0.01 |
| 9126 | G | 1.75  | 0.01 |
| 9127 | A | 1.94  | 0.01 |
| 9128 | G | 0.285 | 0.01 |
| 9129 | G | 0.285 | 0    |
| 9130 | A | 0.61  | 0    |
| 9131 | G | 0     | 0    |
| 9132 | C | 0     | 0.01 |
| 9133 | A | 0.407 | 0.01 |
| 9134 | U | 0.393 | 0.02 |
| 9135 | U | 1.153 | 0.02 |
| 9136 | A | 1.845 | 0    |
| 9137 | U | 0.583 | 0    |
| 9138 | U | 1.166 | 0.01 |
| 9139 | U | 1.397 | 0.01 |
| 9140 | A | 0.624 | 0    |
| 9141 | A | 0.312 | 0    |
| 9142 | U | 0.312 | 0.98 |
| 9143 | G | 0.163 | 0.98 |
| 9144 | C | 0.475 | 0.81 |
| 9145 | A | 1.695 | 0    |
| 9146 | U | 0.122 | 0    |
| 9147 | C | 0.109 | 0    |
| 9148 | C | 0.366 | 0.01 |
| 9149 | A | 0.895 | 0.01 |
| 9150 | G | 0.8   | 0.81 |
| 9151 | C | 0.312 | 0.94 |
| 9152 | U | 0.217 | 0.94 |
| 9153 | C | 0.231 | 0.04 |
| 9154 | A | 0.773 | 0.04 |
| 9155 | A | 0.773 | 0    |
| 9156 | A | 0.068 | 0    |

|      |   |       |          |
|------|---|-------|----------|
| 9157 | C | 0.271 | 0.01     |
| 9158 | U | 0.312 | 0.01     |
| 9159 | U | 0.163 | 0.01     |
| 9160 | C | 0.339 | 0        |
| 9161 | C | 0.38  | 0        |
| 9162 | C | 0.326 | 0        |
| 9163 | A | 0.665 | 0.03     |
| 9164 | G | 0.868 | 0.03     |
| 9165 | U | 0.529 | 0.01     |
| 9166 | G | 0.448 | 0.02     |
| 9167 | G | 0.163 | 0.81     |
| 9168 | G | 0.841 | 0.81     |
| 9169 | A | 1.153 | 0.03     |
| 9170 | U | 0.556 | 0.06     |
| 9171 | G | 0.827 | 0.06     |
| 9172 | A | 1.072 | 0.03     |
| 9173 | C | 0.122 | 0.7      |
| 9174 | C | 0.163 | 0.7      |
| 9175 | C | 0.136 | 0.18     |
| 9176 | U | 0.448 | 0.18     |
| 9177 | U | 0.583 | 0.04     |
| 9178 | G | 0.746 | 0.39     |
| 9179 | G | 0.57  | 0.44     |
| 9180 | G | 1.723 | 0.46     |
| 9181 | G | 0.448 | 0.08     |
| 9182 | A | 0.434 | 0.07     |
| 9183 | G | 2.238 | 0.06     |
| 9184 | A | 1.18  | 0.34     |
| 9185 | G | 0.475 | 0.35     |
| 9186 | G | 0.475 | 0.33     |
| 9187 | U | 0.203 | 0.68     |
| 9188 | U | 0.19  | 0.49     |
| 9189 | C | 0.244 | 0.72     |
| 9190 | U | 0.76  | 0.31     |
| 9191 | A | 0.597 | 0        |
| 9192 | G | 0.583 | 7.00E-04 |
| 9193 | C | 0.298 | 0        |
| 9194 | A | 1.75  | 0.08     |
| 9195 | U | 1.072 | 0.15     |
| 9196 | G | 0.732 | 0.2      |
| 9197 | G | 0.8   | 0.16     |
| 9198 | A | 1.316 | 0.36     |
| 9199 | A | 0.895 | 0.82     |

|      |   |       |      |
|------|---|-------|------|
| 9200 | G | 0.488 | 0.77 |
| 9201 | U | 0.312 | 0.38 |
| 9202 | U | 0.529 | 0.39 |
| 9203 | U | 0.475 | 0.38 |
| 9204 | G | 0.692 | 0.05 |
| 9205 | A | 0.895 | 0.04 |
| 9206 | U | 0.678 | 0.54 |
| 9207 | C | 0.326 | 0.6  |
| 9208 | C | 0.42  | 0.27 |
| 9209 | A | 0.42  | 0.24 |
| 9210 | A | 0.665 | 0.11 |
| 9211 | C | 0.095 | 0.04 |
| 9212 | U | 0.285 | 0.01 |
| 9213 | C | 0.271 | 0.13 |
| 9214 | U | 0.61  | 0.18 |
| 9215 | G | 0.827 | 0.1  |
| 9216 | G | 0.258 | 0.09 |
| 9217 | C | 0.095 | 0.04 |
| 9218 | C | 0.271 | 0.22 |
| 9219 | U | 0.217 | 0.25 |
| 9220 | A | 0.909 | 0.25 |
| 9221 | C | 0.475 | 0.17 |
| 9222 | A | 0.502 | 0.07 |
| 9223 | C | 0.176 | 0.06 |
| 9224 | U | 0.543 | 0.13 |
| 9225 | U | 1.024 | 0.14 |
| 9226 | A | 1.445 | 0.22 |
| 9227 | U | 0.583 | 0.2  |
| 9228 | G | 0.712 | 0.17 |
| 9229 | A | 0.373 | 0.17 |
| 9230 | G | 0.203 | 0.19 |
| 9231 | G | 0.183 | 0.21 |
| 9232 | C | 0.163 | 0.03 |
| 9233 | A | 0.78  | 0    |
| 9234 | U | 0.929 | 0    |
| 9235 | A | 1.424 | 0    |
| 9236 | U | 0.197 | 0.01 |
| 9237 | G | 0.576 | 0.01 |
| 9238 | U | 0.4   | 0    |
| 9239 | U | 0.536 | 0    |
| 9240 | A | 0.956 | 0    |
| 9241 | G | 0.59  | 0    |
| 9242 | A | 0.665 | 0    |

|      |   |       |      |
|------|---|-------|------|
| 9243 | U | 0.522 | 0.08 |
| 9244 | A | 0.549 | 0.11 |
| 9245 | C | 0.149 | 0.34 |
| 9246 | C | 0.21  | 0.99 |
| 9247 | C | 0.258 | 0.95 |
| 9248 | A | 1.004 | 0.83 |
| 9249 | G | 0.949 | 0.75 |
| 9250 | A | 1.085 | 0.71 |
| 9251 | A | 1.621 | 0.02 |
| 9252 | G | 0.631 | 0    |
| 9253 | A | 0.312 | 0    |
| 9254 | G | 0.231 | 0    |
| 9255 | U | 0.359 | 0.64 |
| 9256 | U | 0.57  | 0.77 |
| 9257 | U | 0.461 | 0.85 |
| 9258 | G | 1.004 | 0.9  |
| 9259 | G | 1.445 | 0.99 |
| 9260 | A | 0.651 | 0.44 |
| 9261 | A | 0.637 | 0.11 |
| 9262 | G | 0.366 | 0.07 |
| 9263 | C | 0.38  | 0.01 |
| 9264 | A | 0.543 | 0.01 |
| 9265 | A | 0.597 | 0.87 |
| 9266 | G | 0.176 | 0.93 |
| 9267 | U | 0.149 | 0.98 |
| 9268 | C | 0.285 | 0.06 |
| 9269 | A | 0.502 | 0.03 |
| 9270 | G | 0.407 | 0.04 |
| 9271 | G | 0.475 | 0.04 |
| 9272 | C | 0.095 | 0.92 |
| 9273 | C | 0.176 | 0.94 |
| 9274 | U | 0.163 | 0.88 |
| 9275 | G | 0.271 | 0.01 |
| 9276 | U | 0.312 | 0.18 |
| 9277 | C | 0.231 | 0.26 |
| 9278 | A | 0.556 | 0.22 |
| 9279 | G | 0.773 | 0.05 |
| 9280 | A | 0.705 | 0.05 |
| 9281 | G | 0.705 | 0.01 |
| 9282 | G | 0.692 | 0.01 |
| 9283 | A | 1.044 | 0.01 |
| 9284 | A | 0.42  | 0.02 |
| 9285 | G | 0.936 | 0.02 |



|      |   |       |      |
|------|---|-------|------|
| 9286 | A | 1.194 | 0.01 |
| 9287 | G | 0.488 | 0    |
| 9288 | G | 0.258 | 0.21 |
| 9289 | U | 0.258 | 0.22 |
| 9290 | U | 0.855 | 0.13 |
| 9291 | A | 1.316 | 0    |
| 9292 | G | 2.021 | 0    |
| 9293 | A | 0.963 | 0.01 |
| 9294 | A | 0.136 | 0.01 |
| 9295 | G | 0.176 | 0.01 |
| 9296 | A | 0.271 | 0.01 |
| 9297 | A | 0.122 | 0.01 |
| 9298 | G | 0.42  | 0.01 |
| 9299 | G | 0.027 | 0.01 |
| 9300 | C | 0.014 | 0.99 |
| 9301 | U | 0.298 | 0.99 |
| 9302 | A | 0.909 | 0.01 |
| 9303 | A | 0.665 | 0    |
| 9304 | C | 0.122 | 0    |
| 9305 | C | 0.271 | 0    |
| 9306 | G | 0.57  | 0    |
| 9307 | C | 0.502 | 0.01 |
| 9308 | A | 0.692 | 0.01 |
| 9309 | A | 0.529 | 0.56 |
| 9310 | G | 0.583 | 0.56 |
| 9311 | A | 0.651 | 0.41 |
| 9312 | G | 0.326 | 0.43 |
| 9313 | G | 0.149 | 0.06 |
| 9314 | C | 0.163 | 0    |
| 9315 | C | 0.298 | 0.18 |
| 9316 | U | 0.203 | 0.25 |
| 9317 | U | 0.109 | 0.08 |
| 9318 | C | 0.081 | 0.04 |
| 9319 | U | 0.203 | 0.18 |
| 9320 | U | 0.624 | 0.72 |
| 9321 | A | 1.37  | 0.65 |
| 9322 | A | 0.529 | 0.17 |
| 9323 | C | 0.515 | 0.03 |
| 9324 | A | 0.651 | 0.02 |
| 9325 | U | 0.61  | 0.14 |
| 9326 | G | 0.434 | 0.18 |
| 9327 | G | 0.231 | 0.07 |
| 9328 | C | 0.014 | 0.16 |

|      |   |       |          |
|------|---|-------|----------|
| 9329 | U | 0.217 | 0.64     |
| 9330 | G | 0.38  | 0.71     |
| 9331 | A | 0.393 | 0.19     |
| 9332 | C | 0.258 | 0.04     |
| 9333 | A | 0.814 | 0.03     |
| 9334 | A | 0.76  | 0.03     |
| 9335 | G | 0.855 | 0        |
| 9336 | A | 1.031 | 0        |
| 9337 | A | 1.004 | 0        |
| 9338 | G | 0.705 | 0        |
| 9339 | G | 0.746 | 0        |
| 9340 | A | 0.665 | 0        |
| 9341 | A | 0.529 | 4.61E-06 |
| 9342 | A | 0.38  | 4.98E-06 |
| 9343 | C | 0     | 2.02E-05 |
| 9344 | U | 0.203 | 2.63E-05 |
| 9345 | C | 0.136 | 1.67E-05 |
| 9346 | G | 0.258 | 0        |
| 9347 | C | 0.027 | 0.05     |
| 9348 | U | 0.326 | 0.05     |
| 9349 | G | 0.732 | 0.04     |
| 9350 | A | 1.112 | 0.14     |
| 9351 | A | 0.99  | 0.15     |
| 9352 | A | 0.746 | 0.07     |
| 9353 | C | 0.61  | 0.07     |
| 9354 | A | 0.475 | 0.07     |
| 9355 | G | 0.326 | 0.13     |
| 9356 | C | 0.203 | 0.85     |
| 9357 | A | 0.597 | 0.97     |
| 9358 | G | 0.136 | 1        |
| 9359 | G | 0.109 | 1        |
| 9360 | G | 0.19  | 1        |
| 9361 | A | 0.461 | 0.96     |
| 9362 | C | 0.081 | 0.84     |
| 9363 | U | 0.176 | 0.96     |
| 9364 | U | 0.217 | 1        |
| 9365 | U | 0.081 | 1        |
| 9366 | C | 0.041 | 0.99     |
| 9367 | C | 0.109 | 0.96     |
| 9368 | A | 0.502 | 0.28     |
| 9369 | C | 0.42  | 0.39     |
| 9370 | A | 0.855 | 0.56     |
| 9371 | A | 1.044 | 0.89     |

|      |   |       |      |
|------|---|-------|------|
| 9372 | G | 0.353 | 0.89 |
| 9373 | G | 0.122 | 0.46 |
| 9374 | G | 0.041 | 0.97 |
| 9375 | G | 0.19  | 0.96 |
| 9376 | A | 0.475 | 0.86 |
| 9377 | U | 0.312 | 0.73 |
| 9378 | G | 0.651 | 0.73 |
| 9379 | U | 0.461 | 0.55 |
| 9380 | U | 0.705 | 0.45 |
| 9381 | A | 0.882 | 0.59 |
| 9382 | C | 0.448 | 0.6  |
| 9383 | G | 0.298 | 0.32 |
| 9384 | G | 0.149 | 0.13 |
| 9385 | G | 0.081 | 0.12 |
| 9386 | G | 0.339 | 0.37 |
| 9387 | A | 0.597 | 0.41 |
| 9388 | G | 0.163 | 0.17 |
| 9389 | G | 0.231 | 0.22 |
| 9390 | U | 0.217 | 0.13 |
| 9391 | A | 0.556 | 0.1  |
| 9392 | C | 0.136 | 0.15 |
| 9393 | U | 0.163 | 0.25 |
| 9394 | G | 0.095 | 0.86 |
| 9395 | G | 0.027 | 0.91 |
| 9396 | G | 0.081 | 0.98 |
| 9397 | G | 0.624 | 0.98 |
| 9398 | A | 0.678 | 0.97 |
| 9399 | G | 0.949 | 0.9  |
| 9400 | G | 0.583 | 0.62 |
| 9401 | A | 0.637 | 0.15 |
| 9402 | G | 0.041 | 0.06 |
| 9403 | C | 0.203 | 0.05 |
| 9404 | C | 0.109 | 0.18 |
| 9405 | G | 0.529 | 0.85 |
| 9406 | G | 0.827 | 0.88 |
| 9407 | U | 0.407 | 0.85 |
| 9408 | C | 0.312 | 0.32 |
| 9409 | G | 0.298 | 0.76 |
| 9410 | G | 0.149 | 0.96 |
| 9411 | G | 0.366 | 0.96 |
| 9412 | A | 0.787 | 0.92 |
| 9413 | A | 0.882 | 0.93 |
| 9414 | C | 0.515 | 0.92 |

|      |   |       |      |
|------|---|-------|------|
| 9415 | G | 0.393 | 0.79 |
| 9416 | C | 0.054 | 0.9  |
| 9417 | C | 0.054 | 0.97 |
| 9418 | C | 0.163 | 0.87 |
| 9419 | A | 0.705 | 0.22 |
| 9420 | C | 0.041 | 0.02 |
| 9421 | U | 0.543 | 0.03 |
| 9422 | U | 0.515 | 0.15 |
| 9423 | U | 0.42  | 0.45 |
| 9424 | C | 0.203 | 0.42 |
| 9425 | U | 0.665 | 0.46 |
| 9426 | U | 0.665 | 0.32 |
| 9427 | G | 0.787 | 0.54 |
| 9428 | A | 0.895 | 0.83 |
| 9429 | U | 0.285 | 0.68 |
| 9430 | G | 0.882 | 0.8  |
| 9431 | U | 0.651 | 0.78 |
| 9432 | A | 1.506 | 0.84 |
| 9433 | U | 1.031 | 0.78 |
| 9434 | A | 1.777 | 0.7  |
| 9435 | A | 1.234 | 0.43 |
| 9436 | A | 1.397 | 0.29 |
| 9437 | U | 1.18  | 0.06 |
| 9438 | A | 1.316 | 0.29 |
| 9439 | U | 0.461 | 0.65 |
| 9440 | C | 0.597 | 0.7  |
| 9441 | A | 0.705 | 0.58 |
| 9442 | C | 0.122 | 0.31 |
| 9443 | U | 0.312 | 0.31 |
| 9444 | G | 0.339 | 0.62 |
| 9445 | C | 0.637 | 0.6  |
| 9446 | A | 1.031 | 0.34 |
| 9447 | U | 0.529 | 0.34 |
| 9448 | U | 0.692 | 0.01 |
| 9449 | U | 0.719 | 0.03 |
| 9450 | C | 0.461 | 0.03 |
| 9451 | G | 0.841 | 0.53 |
| 9452 | C | 0.136 | 0.85 |
| 9453 | U | 0.19  | 0.44 |
| 9454 | C | 0.149 | 0.28 |
| 9455 | U | 0.353 | 0.62 |
| 9456 | G | 0.882 | 0.81 |
| 9457 | U | 1.031 | 0.87 |

|      |   |       |          |
|------|---|-------|----------|
| 9458 | A | 1.519 | 0.83     |
| 9459 | U | 1.017 | 0.59     |
| 9460 | U | 1.885 | 0.21     |
| 9461 | C | 0.855 | 0.71     |
| 9462 | A | 0.461 | 1        |
| 9463 | G | 0.054 | 1        |
| 9464 | U | 0.068 | 0.87     |
| 9465 | C | 0.054 | 0.93     |
| 9466 | G | 0     | 1        |
| 9467 | C | 0     | 1        |
| 9468 | U | 0     | 1        |
| 9469 | C | 0     | 1        |
| 9470 | U | 0.014 | 1        |
| 9471 | G | 0     | 1        |
| 9472 | C | 0.217 | 0.98     |
| 9473 | G | 3.459 | 0.62     |
| 9474 | G | 0.109 | 0.98     |
| 9475 | A | 0.041 | 1        |
| 9476 | G | 0.068 | 1        |
| 9477 | A | 0.095 | 1        |
| 9478 | G | 0.258 | 0.98     |
| 9479 | G | 0.068 | 0.99     |
| 9480 | C | 0.014 | 1        |
| 9481 | U | 0.922 | 1        |
| 9482 | G | 0.068 | 1        |
| 9483 | G | 0.095 | 0.98     |
| 9484 | C | 0.909 | 0        |
| 9485 | A | 0.176 | 0.97     |
| 9486 | G | 0.122 | 1        |
| 9487 | A | 0.949 | 0.97     |
| 9488 | U | 2.17  | 3.10E-05 |
| 9489 | U | 0.814 | 7.00E-06 |
| 9490 | G | 0.203 | 0.98     |
| 9491 | A | 0.203 | 1        |
| 9492 | G | 0.027 | 0.98     |
| 9493 | C | 0.014 | 0.98     |
| 9494 | C | 0.014 | 0.98     |
| 9495 | C | 0.244 | 0.03     |
| 9496 | U | 1.506 | 0        |
| 9497 | G | 2.143 | 0        |
| 9498 | G | 1.438 | 0        |
| 9499 | G | 0.787 | 0        |
| 9500 | A | 3.676 | 0        |

|      |   |       |      |
|------|---|-------|------|
| 9501 | G | 0.136 | 0.99 |
| 9502 | G | 0.054 | 1    |
| 9503 | U | 0.109 | 0.98 |
| 9504 | U | 0.054 | 1    |
| 9505 | C | 0.054 | 0.98 |
| 9506 | U | 0.041 | 0.97 |
| 9507 | C | 0.027 | 1    |
| 9508 | U | 0     | 0.97 |
| 9509 | C | 0.014 | 0.99 |
| 9510 | C | 0.095 | 1    |
| 9511 | A | 0.041 | 1    |
| 9512 | G | 0     | 1    |
| 9513 | C | 0.326 | 0.98 |
| 9514 | A | 2.523 | 0.03 |
| 9515 | C | 0.149 | 0.97 |
| 9516 | U | 0.163 | 0.99 |
| 9517 | A | 0.19  | 1    |
| 9518 | G | 0.041 | 1    |
| 9519 | C | 0.095 | 1    |
| 9520 | A | 0.149 | 1    |
| 9521 | G | 0.054 | 1    |
| 9522 | G | 0.339 | 0.98 |
| 9523 | U | 1.343 | 0    |
| 9524 | A | 1.18  | 0    |
| 9525 | G | 0.271 | 0.95 |
| 9526 | A | 0.285 | 0.97 |
| 9527 | G | 0.122 | 0.96 |
| 9528 | C | 0.081 | 0.97 |
| 9529 | C | 0.326 | 0.03 |
| 9530 | U | 1.234 | 0.02 |
| 9531 | G | 2.116 | 0.03 |
| 9532 | G | 1.546 | 0.03 |
| 9533 | G | 0.583 | 0.05 |
| 9534 | U | 0.583 | 0.02 |
| 9535 | G | 0.068 | 0.93 |
| 9536 | U | 0.081 | 0.95 |
| 9537 | U | 0.054 | 0.97 |
| 9538 | C | 0.054 | 0.98 |
| 9539 | C | 0.041 | 0.98 |
| 9540 | C | 1.329 | 1    |
| 9541 | U | 0.149 | 0.99 |
| 9542 | G | 0.014 | 1    |
| 9543 | C | 0.095 | 1    |

|      |   |       |          |
|------|---|-------|----------|
| 9544 | U | 0.081 | 1        |
| 9545 | A | 0.217 | 1        |
| 9546 | G | 0.231 | 0.98     |
| 9547 | A | 0.312 | 0.03     |
| 9548 | C | 0.068 | 0.98     |
| 9549 | U | 0.014 | 1        |
| 9550 | C | 0.014 | 1        |
| 9551 | U | 0.014 | 1        |
| 9552 | C | 0.014 | 0.98     |
| 9553 | A | 0.149 | 0.05     |
| 9554 | C | 0.217 | 0.98     |
| 9555 | C | 0.041 | 1        |
| 9556 | A | 0.095 | 1        |
| 9557 | G | 0.054 | 1        |
| 9558 | C | 0.054 | 1        |
| 9559 | A | 0.014 | 1        |
| 9560 | C | 0.76  | 0.99     |
| 9561 | U | 1.804 | 0.59     |
| 9562 | U | 0.475 | 0        |
| 9563 | G | 0.448 | 0        |
| 9564 | G | 0.163 | 0        |
| 9565 | C | 0.176 | 0        |
| 9566 | C | 0.081 | 1.00E-06 |
| 9567 | G | 0.027 | 0.59     |
| 9568 | G | 0.014 | 0.99     |
| 9569 | U | 0.014 | 1        |
| 9570 | G | 0.014 | 1        |
| 9571 | C | 0.122 | 1        |
| 9572 | U | 0.353 | 1        |
| 9573 | G | 1.099 | 1        |
| 9574 | G | 0.122 | 0.98     |
| 9575 | G | 0.095 | 0.98     |
| 9576 | C | 0.122 | 1        |
| 9577 | A | 0.014 | 1        |
| 9578 | G | 0.136 | 1        |
| 9579 | A | 0.027 | 1        |
| 9580 | G | 0.095 | 1        |
| 9581 | U | 0.136 | 1        |
| 9582 | G | 0.068 | 1        |
| 9583 | A | 0.285 | 0.99     |
| 9584 | C | 0.502 | 0.98     |
| 9585 | U | 0.502 | 0.85     |
| 9586 | C | 0.61  | 0.01     |

|      |   |       |      |
|------|---|-------|------|
| 9587 | C | 1.058 | 0.77 |
| 9588 | A | 0.515 | 0.99 |
| 9589 | C | 0.61  | 0.98 |
| 9590 | G | 0.258 | 0.97 |
| 9591 | C | 0.61  | 0.99 |
| 9592 | U | 0.583 | 1    |
| 9593 | U | 0.353 | 0.99 |
| 9594 | G | 0.122 | 0.99 |
| 9595 | C | 0.339 | 1    |
| 9596 | U | 0.814 | 1    |
| 9597 | U | 0.027 | 1    |
| 9598 | G | 0.42  | 0.99 |
| 9599 | C | 0.99  | 0.99 |
| 9600 | U | 1.492 | 1    |
| 9601 | U | 1.194 | 0.96 |
| 9602 | A | 1.044 | 0.1  |
| 9603 | A | 0.149 | 0.1  |
| 9604 | A | 0     | 0.05 |
| 9605 | G | 0.095 | 0.02 |
| 9606 | C | 0.054 | 0    |
| 9607 | C | 0.014 | 0    |
| 9608 | C | 0.095 | 0.11 |
| 9609 | U | 0.475 | 0.11 |
| 9610 | C | 0.597 | 0.06 |
| 9611 | U | 0.515 | 0.59 |
| 9612 | U | 1.112 | 0.8  |
| 9613 | C | 1.451 | 0.8  |
| 9614 | A | 0.868 | 0.79 |
| 9615 | A | 1.424 | 0.77 |
| 9616 | U | 1.044 | 0.76 |
| 9617 | A | 1.112 | 0.34 |
| 9618 | A | 0.529 | 0.22 |
| 9619 | A | 0.977 | 0.19 |
| 9620 | G | 0.732 | 0.03 |
| 9621 | C |       | 0.04 |
| 9622 | U |       | 0.13 |
| 9623 | G |       | 0.13 |
| 9624 | C |       | 0    |
| 9625 | C |       | 0    |
| 9626 | A |       | 0.07 |
| 9627 | U |       | 0.51 |
| 9628 | U |       | 0.94 |
| 9629 | U |       | 0.95 |



|      |   |      |
|------|---|------|
| 9630 | U | 0.95 |
| 9631 | A | 0.97 |
| 9632 | G | 0.72 |
| 9633 | A | 0.92 |
| 9634 | A | 0.97 |
| 9635 | G | 1    |
| 9636 | U | 1    |
| 9637 | A | 1    |
| 9638 | A | 1    |
| 9639 | A | 1    |
| 9640 | A | 0.98 |
| 9641 | A | 0.98 |
| 9642 | A | 0.99 |
| 9643 | A | 0.98 |
| 9644 | A | 0.96 |
| 9645 | A | 0.98 |
| 9646 | A | 0.86 |
| 9647 | A | 0.97 |
