# Supplementary material for: Comparison of SIV and HIV-1 Genomic RNA Structures Reveals Impact of Sequence Evolution on Conserved and Non-Conserved Structural Motifs
Source: PubMed Central journal article supplement (PMC3616985; doi:10.1371/journal.ppat.1003294), 2013-04-04
Supplement: ppat.1003294.s007.pdf [file ppat.1003294.s007.pdf]

**DATASET S3** Helix file for the HIV-1NL4-3 RNA genome structure model folded with parameters  $m = 1.9$  and  $b = -0.7$ .

| First nucleotide in helix | Last nucleotide in helix | Number of base pairs in helix |
|---------------------------|--------------------------|-------------------------------|
| 1                         | 57                       | 3                             |
| 5                         | 54                       | 11                            |
| 17                        | 43                       | 5                             |
| 25                        | 38                       | 4                             |
| 58                        | 104                      | 8                             |
| 67                        | 94                       | 3                             |
| 70                        | 90                       | 4                             |
| 105                       | 344                      | 10                            |
| 125                       | 223                      | 7                             |
| 134                       | 178                      | 8                             |
| 143                       | 167                      | 2                             |
| 146                       | 164                      | 2                             |
| 148                       | 160                      | 3                             |
| 206                       | 213                      | 2                             |
| 228                       | 334                      | 6                             |
| 236                       | 282                      | 3                             |
| 243                       | 277                      | 4                             |
| 248                       | 270                      | 7                             |
| 283                       | 299                      | 3                             |
| 286                       | 295                      | 3                             |
| 312                       | 325                      | 5                             |
| 346                       | 749                      | 3                             |
| 350                       | 746                      | 2                             |
| 352                       | 743                      | 1                             |
| 354                       | 741                      | 6                             |
| 363                       | 734                      | 4                             |
| 382                       | 537                      | 4                             |
| 394                       | 532                      | 4                             |
| 399                       | 484                      | 9                             |
| 501                       | 526                      | 6                             |
| 510                       | 518                      | 2                             |
| 547                       | 565                      | 4                             |
| 582                       | 657                      | 2                             |
| 586                       | 652                      | 9                             |
| 595                       | 625                      | 4                             |
| 599                       | 616                      | 5                             |
| 627                       | 637                      | 4                             |
| 678                       | 691                      | 2                             |
| 693                       | 722                      | 6                             |

|      |      |   |
|------|------|---|
| 702  | 714  | 2 |
| 752  | 1172 | 5 |
| 759  | 775  | 5 |
| 795  | 849  | 9 |
| 821  | 831  | 4 |
| 855  | 994  | 2 |
| 871  | 913  | 2 |
| 874  | 911  | 6 |
| 915  | 970  | 3 |
| 921  | 964  | 5 |
| 926  | 935  | 3 |
| 946  | 957  | 2 |
| 979  | 991  | 5 |
| 997  | 1014 | 5 |
| 1026 | 1068 | 2 |
| 1028 | 1064 | 5 |
| 1035 | 1055 | 4 |
| 1076 | 1100 | 3 |
| 1080 | 1097 | 5 |
| 1102 | 1142 | 5 |
| 1110 | 1137 | 3 |
| 1116 | 1132 | 6 |
| 1174 | 1764 | 2 |
| 1177 | 1761 | 2 |
| 1180 | 1759 | 6 |
| 1193 | 1299 | 6 |
| 1200 | 1206 | 2 |
| 1211 | 1251 | 3 |
| 1214 | 1247 | 5 |
| 1223 | 1239 | 6 |
| 1252 | 1283 | 4 |
| 1260 | 1273 | 5 |
| 1301 | 1351 | 5 |
| 1308 | 1345 | 5 |
| 1319 | 1335 | 4 |
| 1360 | 1394 | 4 |
| 1375 | 1387 | 5 |
| 1396 | 1558 | 4 |
| 1401 | 1554 | 3 |
| 1405 | 1414 | 2 |
| 1418 | 1457 | 3 |
| 1421 | 1443 | 7 |
| 1459 | 1522 | 6 |

|      |      |    |
|------|------|----|
| 1465 | 1515 | 3  |
| 1469 | 1511 | 3  |
| 1476 | 1505 | 4  |
| 1481 | 1500 | 4  |
| 1531 | 1541 | 3  |
| 1568 | 1707 | 10 |
| 1583 | 1694 | 3  |
| 1593 | 1599 | 2  |
| 1604 | 1636 | 8  |
| 1615 | 1625 | 3  |
| 1638 | 1682 | 7  |
| 1645 | 1672 | 12 |
| 1709 | 1728 | 3  |
| 1713 | 1724 | 4  |
| 1731 | 1752 | 5  |
| 1767 | 1779 | 2  |
| 1781 | 1973 | 5  |
| 1788 | 1953 | 7  |
| 1796 | 1946 | 7  |
| 1805 | 1938 | 4  |
| 1810 | 1918 | 2  |
| 1813 | 1916 | 7  |
| 1823 | 1849 | 6  |
| 1829 | 1842 | 3  |
| 1862 | 1881 | 5  |
| 1922 | 1930 | 3  |
| 1991 | 2326 | 9  |
| 2015 | 2121 | 8  |
| 2024 | 2112 | 10 |
| 2042 | 2070 | 7  |
| 2051 | 2062 | 3  |
| 2072 | 2082 | 3  |
| 2135 | 2144 | 3  |
| 2145 | 2171 | 6  |
| 2192 | 2199 | 2  |
| 2201 | 2238 | 7  |
| 2245 | 2260 | 4  |
| 2268 | 2310 | 5  |
| 2273 | 2301 | 4  |
| 2278 | 2297 | 2  |
| 2330 | 2366 | 6  |
| 2340 | 2357 | 5  |
| 2378 | 2429 | 8  |

|      |      |    |
|------|------|----|
| 2392 | 2415 | 3  |
| 2398 | 2412 | 2  |
| 2401 | 2409 | 2  |
| 2430 | 2958 | 2  |
| 2434 | 2954 | 2  |
| 2447 | 2952 | 8  |
| 2468 | 2944 | 7  |
| 2476 | 2532 | 5  |
| 2482 | 2527 | 2  |
| 2492 | 2517 | 3  |
| 2496 | 2513 | 2  |
| 2537 | 2586 | 5  |
| 2544 | 2580 | 3  |
| 2548 | 2576 | 6  |
| 2558 | 2565 | 2  |
| 2602 | 2927 | 5  |
| 2619 | 2916 | 4  |
| 2625 | 2657 | 3  |
| 2629 | 2654 | 10 |
| 2659 | 2911 | 4  |
| 2663 | 2906 | 11 |
| 2683 | 2895 | 2  |
| 2702 | 2771 | 4  |
| 2708 | 2761 | 4  |
| 2721 | 2750 | 4  |
| 2727 | 2745 | 4  |
| 2731 | 2740 | 2  |
| 2772 | 2887 | 2  |
| 2774 | 2882 | 5  |
| 2781 | 2802 | 7  |
| 2810 | 2836 | 3  |
| 2814 | 2833 | 6  |
| 2843 | 2857 | 5  |
| 2959 | 2970 | 3  |
| 2972 | 3303 | 2  |
| 2975 | 3301 | 6  |
| 2995 | 3294 | 3  |
| 3001 | 3036 | 5  |
| 3014 | 3024 | 4  |
| 3041 | 3255 | 5  |
| 3055 | 3245 | 5  |
| 3074 | 3089 | 2  |
| 3092 | 3176 | 4  |

|      |      |    |
|------|------|----|
| 3099 | 3172 | 3  |
| 3103 | 3131 | 4  |
| 3139 | 3150 | 4  |
| 3178 | 3190 | 3  |
| 3205 | 3223 | 3  |
| 3269 | 3290 | 5  |
| 3307 | 3351 | 12 |
| 3319 | 3336 | 3  |
| 3323 | 3332 | 3  |
| 3353 | 3726 | 5  |
| 3367 | 3710 | 2  |
| 3371 | 3706 | 7  |
| 3392 | 3427 | 5  |
| 3398 | 3418 | 7  |
| 3429 | 3699 | 2  |
| 3431 | 3696 | 4  |
| 3438 | 3692 | 2  |
| 3443 | 3687 | 3  |
| 3458 | 3468 | 3  |
| 3470 | 3668 | 4  |
| 3491 | 3510 | 1  |
| 3493 | 3509 | 5  |
| 3525 | 3563 | 7  |
| 3536 | 3554 | 4  |
| 3582 | 3650 | 4  |
| 3587 | 3645 | 5  |
| 3593 | 3604 | 4  |
| 3606 | 3639 | 2  |
| 3609 | 3636 | 6  |
| 3652 | 3663 | 2  |
| 3745 | 4058 | 3  |
| 3749 | 4053 | 3  |
| 3754 | 4048 | 9  |
| 3773 | 3791 | 7  |
| 3796 | 3922 | 3  |
| 3799 | 3917 | 2  |
| 3811 | 3906 | 3  |
| 3818 | 3899 | 9  |
| 3830 | 3838 | 2  |
| 3840 | 3890 | 6  |
| 3847 | 3883 | 2  |
| 3850 | 3880 | 3  |
| 3857 | 3872 | 4  |

|      |      |    |
|------|------|----|
| 3924 | 4012 | 7  |
| 3939 | 4005 | 5  |
| 3945 | 3999 | 1  |
| 3947 | 3998 | 6  |
| 3956 | 3992 | 4  |
| 3962 | 3980 | 5  |
| 3968 | 3975 | 2  |
| 4014 | 4020 | 2  |
| 4031 | 4038 | 2  |
| 4068 | 4098 | 3  |
| 4072 | 4095 | 6  |
| 4078 | 4088 | 2  |
| 4099 | 4129 | 4  |
| 4131 | 4518 | 2  |
| 4135 | 4514 | 7  |
| 4143 | 4357 | 4  |
| 4158 | 4175 | 6  |
| 4183 | 4195 | 2  |
| 4199 | 4353 | 4  |
| 4204 | 4349 | 8  |
| 4215 | 4265 | 3  |
| 4280 | 4299 | 4  |
| 4301 | 4316 | 4  |
| 4321 | 4341 | 2  |
| 4362 | 4503 | 7  |
| 4447 | 4488 | 5  |
| 4453 | 4482 | 1  |
| 4456 | 4479 | 3  |
| 4459 | 4473 | 3  |
| 4490 | 4496 | 2  |
| 4551 | 5036 | 10 |
| 4573 | 4586 | 4  |
| 4588 | 4934 | 10 |
| 4601 | 4914 | 8  |
| 4614 | 4902 | 2  |
| 4617 | 4692 | 4  |
| 4633 | 4682 | 5  |
| 4642 | 4674 | 3  |
| 4646 | 4670 | 4  |
| 4694 | 4732 | 3  |
| 4698 | 4728 | 4  |
| 4702 | 4721 | 7  |
| 4741 | 4752 | 2  |

|      |      |    |
|------|------|----|
| 4754 | 4770 | 6  |
| 4797 | 4899 | 7  |
| 4807 | 4822 | 3  |
| 4829 | 4891 | 9  |
| 4840 | 4856 | 7  |
| 4938 | 4999 | 6  |
| 4951 | 4985 | 5  |
| 4960 | 4980 | 6  |
| 5010 | 5022 | 5  |
| 5079 | 5435 | 3  |
| 5083 | 5431 | 5  |
| 5091 | 5426 | 5  |
| 5099 | 5208 | 3  |
| 5103 | 5205 | 5  |
| 5114 | 5132 | 4  |
| 5139 | 5163 | 2  |
| 5144 | 5158 | 4  |
| 5166 | 5194 | 6  |
| 5209 | 5394 | 5  |
| 5216 | 5384 | 9  |
| 5234 | 5265 | 3  |
| 5239 | 5261 | 5  |
| 5245 | 5255 | 2  |
| 5267 | 5297 | 6  |
| 5273 | 5283 | 4  |
| 5303 | 5343 | 4  |
| 5307 | 5337 | 4  |
| 5311 | 5331 | 6  |
| 5349 | 5370 | 2  |
| 5352 | 5367 | 1  |
| 5355 | 5364 | 3  |
| 5404 | 5419 | 6  |
| 5436 | 5791 | 3  |
| 5440 | 5787 | 4  |
| 5444 | 5455 | 4  |
| 5467 | 5774 | 13 |
| 5482 | 5755 | 7  |
| 5499 | 5519 | 3  |
| 5503 | 5515 | 4  |
| 5530 | 5581 | 5  |
| 5536 | 5576 | 3  |
| 5542 | 5571 | 2  |
| 5545 | 5568 | 3  |

|      |      |   |
|------|------|---|
| 5549 | 5565 | 2 |
| 5588 | 5659 | 2 |
| 5599 | 5645 | 3 |
| 5605 | 5639 | 6 |
| 5612 | 5632 | 1 |
| 5614 | 5631 | 4 |
| 5664 | 5691 | 3 |
| 5668 | 5687 | 6 |
| 5725 | 5740 | 4 |
| 5793 | 6013 | 7 |
| 5803 | 6004 | 5 |
| 5816 | 5830 | 6 |
| 5846 | 5861 | 6 |
| 5866 | 5998 | 8 |
| 5874 | 5989 | 4 |
| 5889 | 5985 | 4 |
| 5895 | 5981 | 7 |
| 5904 | 5913 | 2 |
| 5915 | 5973 | 3 |
| 5927 | 5962 | 4 |
| 5931 | 5952 | 4 |
| 5936 | 5947 | 4 |
| 6020 | 6318 | 8 |
| 6029 | 6050 | 4 |
| 6051 | 6134 | 2 |
| 6062 | 6123 | 7 |
| 6070 | 6098 | 4 |
| 6075 | 6093 | 3 |
| 6101 | 6113 | 3 |
| 6135 | 6201 | 3 |
| 6139 | 6197 | 2 |
| 6141 | 6194 | 3 |
| 6144 | 6190 | 4 |
| 6149 | 6185 | 2 |
| 6155 | 6180 | 4 |
| 6159 | 6175 | 2 |
| 6207 | 6249 | 4 |
| 6212 | 6244 | 3 |
| 6219 | 6241 | 5 |
| 6224 | 6235 | 2 |
| 6251 | 6258 | 2 |
| 6270 | 6290 | 6 |
| 6328 | 6798 | 5 |



|      |      |    |
|------|------|----|
| 6334 | 6355 | 4  |
| 6358 | 6371 | 3  |
| 6372 | 6792 | 4  |
| 6381 | 6780 | 4  |
| 6385 | 6775 | 3  |
| 6390 | 6770 | 1  |
| 6393 | 6767 | 2  |
| 6398 | 6704 | 5  |
| 6404 | 6415 | 3  |
| 6416 | 6695 | 4  |
| 6422 | 6690 | 4  |
| 6429 | 6685 | 3  |
| 6432 | 6681 | 3  |
| 6436 | 6677 | 2  |
| 6456 | 6467 | 4  |
| 6469 | 6657 | 2  |
| 6475 | 6651 | 7  |
| 6483 | 6628 | 2  |
| 6485 | 6625 | 5  |
| 6499 | 6620 | 5  |
| 6506 | 6611 | 4  |
| 6515 | 6603 | 3  |
| 6518 | 6537 | 4  |
| 6522 | 6531 | 3  |
| 6538 | 6595 | 4  |
| 6543 | 6590 | 3  |
| 6546 | 6586 | 6  |
| 6552 | 6579 | 4  |
| 6706 | 6762 | 2  |
| 6711 | 6757 | 9  |
| 6801 | 6820 | 6  |
| 6839 | 7188 | 4  |
| 6846 | 7179 | 2  |
| 6850 | 7176 | 5  |
| 6855 | 7170 | 3  |
| 6861 | 7155 | 7  |
| 6869 | 6887 | 7  |
| 6893 | 7074 | 1  |
| 6895 | 7073 | 7  |
| 6904 | 7056 | 10 |
| 6923 | 7040 | 4  |
| 6929 | 7036 | 5  |
| 6937 | 6957 | 6  |

|      |      |    |
|------|------|----|
| 6959 | 7009 | 5  |
| 6965 | 6989 | 2  |
| 6971 | 6984 | 3  |
| 6992 | 7004 | 4  |
| 7076 | 7112 | 5  |
| 7081 | 7097 | 5  |
| 7113 | 7137 | 9  |
| 7235 | 7778 | 5  |
| 7245 | 7599 | 1  |
| 7247 | 7597 | 5  |
| 7256 | 7590 | 8  |
| 7272 | 7578 | 11 |
| 7283 | 7566 | 3  |
| 7291 | 7557 | 7  |
| 7298 | 7547 | 4  |
| 7304 | 7539 | 8  |
| 7312 | 7530 | 3  |
| 7316 | 7526 | 5  |
| 7321 | 7520 | 4  |
| 7325 | 7515 | 4  |
| 7333 | 7508 | 5  |
| 7338 | 7502 | 4  |
| 7343 | 7408 | 6  |
| 7350 | 7378 | 1  |
| 7353 | 7375 | 3  |
| 7356 | 7371 | 2  |
| 7358 | 7368 | 4  |
| 7383 | 7399 | 7  |
| 7411 | 7428 | 7  |
| 7437 | 7465 | 4  |
| 7443 | 7459 | 7  |
| 7468 | 7493 | 9  |
| 7601 | 7616 | 4  |
| 7621 | 7643 | 3  |
| 7627 | 7636 | 2  |
| 7647 | 7692 | 6  |
| 7658 | 7682 | 3  |
| 7705 | 7770 | 6  |
| 7712 | 7764 | 2  |
| 7716 | 7760 | 2  |
| 7732 | 7743 | 3  |
| 7792 | 8218 | 12 |
| 7825 | 8161 | 8  |

|      |      |    |
|------|------|----|
| 7852 | 7894 | 9  |
| 7863 | 7883 | 3  |
| 7866 | 7877 | 3  |
| 7896 | 8152 | 7  |
| 7916 | 8131 | 9  |
| 7928 | 8118 | 4  |
| 7933 | 8114 | 5  |
| 7940 | 8107 | 3  |
| 7944 | 8049 | 5  |
| 7949 | 8043 | 3  |
| 7954 | 8039 | 3  |
| 7965 | 8029 | 3  |
| 7968 | 8025 | 5  |
| 7975 | 8018 | 3  |
| 7991 | 8015 | 5  |
| 7997 | 8009 | 4  |
| 8052 | 8100 | 4  |
| 8059 | 8071 | 3  |
| 8073 | 8087 | 5  |
| 8169 | 8205 | 4  |
| 8173 | 8194 | 3  |
| 8178 | 8190 | 4  |
| 8224 | 8555 | 3  |
| 8228 | 8551 | 6  |
| 8235 | 8247 | 3  |
| 8262 | 8280 | 2  |
| 8265 | 8277 | 4  |
| 8282 | 8348 | 5  |
| 8288 | 8339 | 6  |
| 8302 | 8327 | 2  |
| 8305 | 8325 | 5  |
| 8310 | 8319 | 3  |
| 8359 | 8545 | 10 |
| 8370 | 8534 | 8  |
| 8399 | 8412 | 4  |
| 8418 | 8442 | 4  |
| 8422 | 8435 | 4  |
| 8461 | 8498 | 11 |
| 8499 | 8519 | 3  |
| 8502 | 8513 | 1  |
| 8503 | 8511 | 3  |
| 8578 | 9139 | 5  |
| 8591 | 8624 | 2  |

|      |      |    |
|------|------|----|
| 8596 | 8619 | 2  |
| 8599 | 8616 | 5  |
| 8626 | 9036 | 6  |
| 8635 | 9028 | 8  |
| 8649 | 8666 | 2  |
| 8651 | 8663 | 4  |
| 8667 | 8681 | 5  |
| 8686 | 9009 | 7  |
| 8694 | 8999 | 5  |
| 8700 | 8803 | 6  |
| 8710 | 8792 | 4  |
| 8721 | 8781 | 3  |
| 8724 | 8750 | 10 |
| 8753 | 8773 | 8  |
| 8807 | 8994 | 6  |
| 8817 | 8985 | 5  |
| 8830 | 8973 | 4  |
| 8837 | 8966 | 3  |
| 8842 | 8961 | 2  |
| 8845 | 8932 | 4  |
| 8851 | 8859 | 2  |
| 8867 | 8906 | 10 |
| 8878 | 8896 | 4  |
| 8884 | 8890 | 2  |
| 8912 | 8927 | 5  |
| 8934 | 8951 | 4  |
| 9010 | 9019 | 2  |
| 9042 | 9057 | 5  |
| 9059 | 9067 | 2  |
| 9074 | 9134 | 5  |
| 9080 | 9129 | 11 |
| 9092 | 9118 | 5  |
| 9100 | 9113 | 4  |
| 9141 | 9170 | 4  |
| 9145 | 9165 | 5  |
