# Supplementary material for: Comparison of SIV and HIV-1 Genomic RNA Structures Reveals Impact of Sequence Evolution on Conserved and Non-Conserved Structural Motifs
Source: PLOS journal article supplement (doi:10.1371/journal.ppat.1003294), 2013-04-04
Supplement: S10 (10.1371/journal.ppat.1003294.s010) [file journal.ppat.1003294.s010]

**Table S2** Start and end points corresponding to regions in the 75-nt moving window of median SIVmac239 SHAPE reactivities with values lower than 0.3 (from Figure 2B).

| Region    | Start | End  | Nucleotides in Structure | GC | AU | GU |
|-----------|-------|------|--------------------------|----|----|----|
| 1*        | 1     | 488  | 1-539                    | 99 | 60 | 16 |
| 2         | 720   | 804  |                          |    |    |    |
| 3#        | 2091  | 2193 | 2098-2187                | 11 | 14 | 4  |
| 4#        | 2434  | 2548 | 2462-2497                | 9  | 7  | 0  |
| 5#        | 2616  | 2871 | 2641-2895                | 32 | 33 | 10 |
| 6#        | 2969  | 3044 | 2996-3038                | 6  | 3  | 1  |
| 7#        | 3254  | 3361 | 3285-3323                | 5  | 5  | 0  |
| 8#        | 4679  | 4756 | 4679-4726                | 8  | 3  | 4  |
| 9#        | 4819  | 4914 | 4862-4907                | 5  | 6  | 1  |
| 10#       | 4926  | 5000 | 4976-4988;<br>5220-5232  | 7  | 4  | 2  |
| 11#       | 5409  | 5522 | 5392-5527                | 54 | 35 | 8  |
| 12#       | 5818  | 5987 | 5786-5946                |    |    |    |
| 13#       | 7095  | 7236 | 7166-7223                | 6  | 8  | 2  |
| 14#       | 8200  | 8332 | 8233-8359                | 28 | 14 | 7  |
| 15        | 9433  | 9655 |                          |    |    |    |
| G-P-P FS* | 1793  | 1974 | 1793-1879                | 17 | 6  | 1  |
| RRE*      | 7617  | 7853 | 7601-7909                | 47 | 25 | 13 |

GC: G-C base pair; AU: A-U base pair; GU: G-U base pair; G-P-P FS: Gag-Pro-Pol frameshift; RRE: Rev response element. Asterisks (\*) indicate structures of known function and pound signs (#) indicate structures of unknown function used for GC versus AU/GU and G versus A comparisons. For the GC versus AU/GU analysis, the valley at position 10, which corresponds to the 5' side of the longest continuous helix, was included along with the paired nucleotides on the 3' side. Nucleotides corresponding to valleys 11 and 12 were also taken together since they spanned both sides of the resultant stems. In all cases, we included 37 nucleotides before and after each region to include all of the nucleotides that are included in the 75-nt window.
